# Supplementary material for: Construction and experimental validation of a B cell-related gene signature to predict the prognosis and immunotherapeutic sensitivity in bladder cancer
Source: Aging (Albany NY). 2023 Jun 27;15(12):5355–80. doi: 10.18632/aging.204753 (PMC10333061; doi:10.18632/aging.204753)
Supplement: Supplementary Table 3 [file aging-15-204753-s003.xlsx]

## Sheet: Sheet1
Supplementary Table 3. The B cell infiltration levels evaluated by various algorithms in TCGA-BLCA cohort.
ID	B cell_TIMER	B cell_QUANTISEQ	B cell_MCPCOUNTER	B cell_XCELL	B cell_EPIC
TCGA-KQ-A41S-01	0.0451201	0.00432265	0.574	0	0.00105
TCGA-E7-A7DV-01	0	0.00671536	0.72	0.0329	4.17e-06
TCGA-H4-A2HO-01	0.0224288	0.00708394	0.879	5.48e-20	0.00339
TCGA-K4-A6FZ-01	0.0607537	0.00498477	1.63	0.0107	0.00215
TCGA-CU-A5W6-01	0.0357294	0.00145728	1.05	0.0016	0.00152
TCGA-S5-A6DX-01	0.0417049	0.00813113	4.5	0.107	0.00801
TCGA-XF-A8HH-01	0.0540349	0.00293616	0.951	8.54e-19	2.8e-07
TCGA-C4-A0F0-01	0.0578754	0.00179981	0.16	0.00236	0.000727
TCGA-C4-A0F7-01	0.0723864	0.00870244	0.429	0	0.000613
TCGA-GD-A3OP-01	0.0762658	0.0090005	2.62	4.88e-19	0.0033
TCGA-XF-A9T6-01	0.0752116	0.00434576	0.228	0.00638	1.75e-07
TCGA-DK-A1A5-01	0.00703362	0.00228379	0.393	0.00448	1.14e-05
TCGA-GD-A6C6-01	0.0661124	0.00172131	0.112	0.0148	0.000439
TCGA-E7-A4XJ-01	0.0324972	0.00470824	0.32	5.34e-21	8.27e-08
TCGA-XF-A9T3-01	0.0831942	0.00713454	4.49	0.0104	0.00658
TCGA-FD-A6TF-01	0.0558875	0.00553932	4.45	0.027	0.00562
TCGA-5N-A9KI-01	0.088106	0.00595176	1.74	0.0271	0.00033
TCGA-BL-A13J-01	0.0489146	0.00420389	0.462	9.18e-23	3.19e-07
TCGA-FD-A62N-01	0.0406444	0.0208804	12.9	0.27	0.0252
TCGA-K4-A4AB-01	0.106881	0.003692	1.66	0	0.00124
TCGA-ZF-AA4N-01	0	0.0111723	0.0931	0.00162	0.00319
TCGA-C4-A0F1-01	0.0322421	0.00241656	1	0.00606	0.00062
TCGA-XF-AAMT-01	0.078966	0.00814294	1.35	0.0234	0.00118
TCGA-UY-A8OC-01	0.031575	0.000665026	3.36	0.00162	0.00478
TCGA-FD-A6TG-01	0.125936	0.00686272	4.17	0.04	0.00477
TCGA-GD-A3OQ-01	0.0582783	0.00195881	0.523	3.47e-19	0.000739
TCGA-XF-A9SJ-01	0.0848416	0.00873076	2.4	0.0247	0.00345
TCGA-FT-A3EE-01	0.0286678	0.010939	1.53	0.0195	0.00276
TCGA-K4-A3WU-01	0.169984	0.0553957	26.6	0.304	0.0423
TCGA-ZF-A9RE-01	0.0970387	0.00401505	0.298	0.00774	0.000919
TCGA-FD-A43X-01	0.049255	0.000478249	0.156	6.73e-19	0.000204
TCGA-UY-A9PF-01	0.0726606	0.00770062	3.33	0.0269	0.00244
TCGA-XF-AAN8-01	0	0.0113525	5.09	0.0213	3.14e-08
TCGA-FD-A3B7-01	0.10329	0.00907803	7.62	0.0849	0.0109
TCGA-XF-A9ST-01	0.0145634	0.000467911	0.328	0.00414	0.000802
TCGA-E7-A6MD-01	0.154912	0.0222709	11.2	0.155	0.0166
TCGA-FD-A6TH-01	0.0300178	0.00398351	3.34	0.0223	7.96e-05
TCGA-BT-A3PH-01	0.031534	0.00054648	0.126	0	3.59e-07
TCGA-GU-A767-01	0.0605726	0.000333702	0.335	0	0.000744
TCGA-DK-A3IK-01	0.0394093	0.00805828	3.35	0.0439	0.00438
TCGA-CU-A0YO-01	0.0681445	0.0102326	1.61	0.00171	0.00311
TCGA-BT-A20R-01	0.0318407	0.0071107	1.23	7.28e-20	1.17e-05
TCGA-BT-A20V-01	0.122663	0.0144681	0.428	0.0367	0.000186
TCGA-CU-A3QU-01	0.0730082	0.00279756	2.38	0.0389	0.001
TCGA-E7-A3Y1-01	0.0672073	0.00412447	0.497	0	8.57e-09
TCGA-FD-A5BV-01	0.0758153	0.00418809	0.999	0	0.000802
TCGA-FD-A3SO-01	0.0239508	0.00518823	0.916	0.03	0.0016
TCGA-ZF-AA5N-01	0.0116389	0.00216487	0.474	0.0112	3.47e-05
TCGA-FD-A5BX-01	0	0.000771544	0.51	0	0.000609
TCGA-XF-A9SU-01	0.0575905	0.00372259	2.34	0.0214	0.00396
TCGA-FD-A6TC-01	0.0463964	0.000893719	0.731	0	8.46e-08
TCGA-UY-A9PE-01	0.0376829	0.00574951	2.29	0.0256	0.00328
TCGA-FD-A62P-01	0.0496479	0.00580233	0.807	0.00348	3.87e-06
TCGA-BT-A0S7-01	0.0671015	0.012171	1.07	0.0328	0.0022
TCGA-XF-A8HC-01	0.0418944	0.000778697	0.331	0	0.000254
TCGA-BL-A3JM-01	0.0826206	0.00581716	0.663	0.000292	0.00102
TCGA-XF-AAMX-01	0.0670216	0.00708623	2.19	0	0.00101
TCGA-G2-AA3C-01	0.00424078	0	0.0629	0.0346	1.68e-06
TCGA-GU-AATQ-01	0.0723533	0.00311409	0.306	0.00205	0.000987
TCGA-FD-A62O-01	0	0.00251322	0.733	0	3.72e-05
TCGA-G2-A3IB-01	0.0221101	0	0.854	0.0028	0.00102
TCGA-BL-A13I-01	0	0.00330975	0.17	0.0575	0.000503
TCGA-GD-A76B-01	0.10346	0.0102361	4.24	0.0966	0.00932
TCGA-GU-A762-01	0.183058	0.00545623	1.71	0.0771	0.003
TCGA-XF-AAML-01	0.216686	0.0302394	0.656	0.0501	0.000993
TCGA-DK-A2I2-01	0	0.0035656	0.339	0.0315	5.85e-07
TCGA-E7-A97Q-01	0.03136	0.00451367	1.88	0	0.000287
TCGA-DK-A3IM-01	0.040043	0.00462779	1.29	5.27e-21	0.000895
TCGA-DK-A3IN-01	0.057188	0.00953559	1.52	0.0268	0.00313
TCGA-BT-A20X-01	0.0640211	0.00354485	1.28	0.0154	0.00249
TCGA-FD-A5BY-01	0.0604202	0.00653452	0.34	0.00791	3.45e-05
TCGA-XF-AAMW-01	0.0379156	0.00402482	1.11	0.0151	0.00176
TCGA-2F-A9KW-01	0.00379409	0.00746685	0.335	1.25e-18	0.00083
TCGA-BT-A20W-01	0.0676271	0.0111951	3.16	0.03	0.00597
TCGA-GV-A3QH-01	0.0841391	0.00400035	0.558	0.00671	0.00113
TCGA-ZF-AA56-01	0.114895	0.0138199	6.73	0.0922	0.0102
TCGA-GV-A40E-01	0.0359901	0.0115049	0.192	4.4e-20	3.6e-08
TCGA-ZF-AA4U-01	0.0893996	8.23e-05	0.0988	4.97e-19	1.63e-08
TCGA-FD-A3B5-01	0.0523543	0.00431881	0.595	0.00152	0.000194
TCGA-FJ-A871-01	0	0.0032697	0.067	0	0.000137
TCGA-GC-A6I1-01	0.0995719	0.00652471	13	0.198	0.0265
TCGA-C4-A0EZ-01	0.014261	0.00593468	0.256	0	0.00209
TCGA-HQ-A5ND-01	0.127743	0.00209968	0.738	0	0.000165
TCGA-K4-A5RH-01	0.407772	0.00330338	0.841	0.0527	0.00145
TCGA-K4-A4AC-01	0.0159036	0.00322705	0.142	0.00763	0.000477
TCGA-YC-A8S6-01	0.0536899	0.00449931	0.366	0	0.00142
TCGA-DK-A3IV-01	0.169563	0.0201806	9.83	0.211	0.0141
TCGA-FD-A6TI-01	0.0442888	0.0067119	0.584	1.16e-18	1.14e-05
TCGA-BT-A3PK-01	0.0425353	0.00363483	0.467	2.57e-19	9.41e-05
TCGA-4Z-AA86-01	0.0507131	0.00876209	2.83	0.0709	0.004
TCGA-DK-A3WX-01	0.000157658	0	0.749	0.0047	0.000605
TCGA-FJ-A3ZE-01	0.0555527	0	0.748	0	1.33e-06
TCGA-GU-AATO-01	0.0798782	0.00772713	4.09	0.103	0.00691
TCGA-FD-A5BT-01	0.0427447	0.012579	2.99	0.155	0.00414
TCGA-FD-A6TK-01	0.047145	0.00337917	1.69	0.0344	0.00114
TCGA-GU-A42P-01	0.0748732	0.00452328	0.434	0	0.000748
TCGA-CF-A47S-01	0.0788378	0.00471817	0.291	0.00344	0.000526
TCGA-FT-A61P-01	0.0111923	0.00781338	0.752	0.00962	0.000951
TCGA-DK-AA75-01	0.0324733	0.0019842	0.146	0	0.000788
TCGA-GU-A42Q-01	0.0838808	0.00320854	0.139	0.00608	8.15e-08
TCGA-XF-AAMH-01	0	0	0.0875	2.76e-18	1.13e-08
TCGA-CF-A8HX-01	0.0410205	0.00440873	0.139	0.00427	2.87e-08
TCGA-CF-A8HY-01	0.0600798	0.000801651	0.134	1.05e-18	0.000173
TCGA-K4-A5RI-01	0.0838666	0.00215818	0.366	0	0.000285
TCGA-K4-AAQO-01	0.0762247	0.0106822	5.51	0.0321	0.0101
TCGA-CF-A9FF-01	0.072196	0.0178584	7.48	0.139	0.0151
TCGA-XF-A9SW-01	0.0649529	0.0164982	5.15	0	0.00886
TCGA-2F-A9KP-01	0.069467	0.00823737	1.61	0.00542	0.0014
TCGA-YF-AA3L-01	0.0450617	0.00178005	0.577	0	0.000297
TCGA-CF-A5UA-01	0.0597534	0.00469366	0.173	0	6.75e-09
TCGA-DK-AA76-01	0.0854305	0.00103885	0.274	1.27e-19	0.000241
TCGA-CF-A47W-01	0.0799273	0.00384178	0.161	1.46e-18	0.000675
TCGA-CF-A7I0-01	0.0466197	0.00342391	0.628	6.58e-18	0.00121
TCGA-CF-A3MG-01	0.0935998	0.00293315	0.392	0	0.000159
TCGA-BT-A20O-01	0.41504	0.0279365	16.9	0.309	0.0289
TCGA-CF-A3MI-01	0.0347495	0.000602297	0.115	6.61e-19	3.29e-07
TCGA-HQ-A5NE-01	0.0539896	0.0049597	0.777	6.91e-20	0.000793
TCGA-PQ-A6FI-01	0.0803315	0.000274365	0.33	0.0186	0.000591
TCGA-ZF-AA5P-01	0.10109	0.027779	10.4	0.0677	0.0192
TCGA-CF-A47Y-01	0.0486978	0.00163525	0.172	0	0.000109
TCGA-FD-A6TE-01	0.156404	0.00701902	3.75	0.0137	0.00248
TCGA-BL-A5ZZ-01	0	0.00429138	0.294	2.74e-18	5.12e-07
TCGA-CF-A47V-01	0.0702227	0.00519162	0.548	0	0.00168
TCGA-CF-A1HS-01	0.111034	0.00211405	0.578	0.0292	0.000974
TCGA-CF-A3MF-01	0.0407329	0.00241746	0.0689	0	1.92e-07
TCGA-CF-A47X-01	0.0869595	0.00484214	0.488	0.0158	0.00101
TCGA-FD-A3B8-01	0.140984	0.0338759	17.8	0.206	0.0226
TCGA-CF-A47T-01	0.0537472	0.00175837	0.127	1.13e-18	9.67e-05
TCGA-FJ-A3Z9-01	0.0374071	0.00175465	0.157	0	9.31e-05
TCGA-FD-A6TD-01	0.123975	0.00654819	3.21	0.0787	0.00584
TCGA-XF-A9SV-01	0.0303396	0.00167806	0.89	2.66e-19	0.000197
TCGA-CF-A1HR-01	0.0750665	0.00548772	1.77	0.0152	0.00377
TCGA-FD-A3SS-01	0.0512499	0.00492097	1.02	1.52e-19	1.33e-07
TCGA-CU-A0YN-01	0.0106797	0.00359168	2.28	0.0536	0.0037
TCGA-E7-A85H-01	0.0679471	0.00350856	1.06	0.0413	0.00159
TCGA-CF-A3MH-01	0.0898136	0.00304537	0.479	0.000106	5.92e-08
TCGA-CF-A9FM-01	0.0790932	0.00511021	0.745	0.00389	0.00157
TCGA-CF-A5U8-01	0.0677236	0.00145496	0.359	2.47e-19	0.000618
TCGA-BT-A0YX-01	0.0757253	0.00811914	1.06	0.0528	0.00447
TCGA-FD-A62S-01	0.104826	0.00997836	4.78	0.048	0.00611
TCGA-ZF-A9RD-01	0.104551	0.0211047	10.3	0.278	0.0166
TCGA-MV-A51V-01	0.00704657	0.00404397	0.647	0	0.00063
TCGA-CU-A72E-01	0.0423184	0.0015949	0.335	0	0.000351
TCGA-DK-A3IL-01	0.0568188	0.00819799	5.02	0.0749	0.00571
TCGA-DK-AA6Q-01	0.0367926	0.0129358	0.243	0.0262	0.00182
TCGA-DK-AA6W-01	0.0943325	0.00808854	0.838	0.0324	0.0027
TCGA-DK-AA71-01	0.0443876	0.000863831	0.375	0	5.36e-06
TCGA-YF-AA3M-01	0.0818874	0.00236976	0.229	1.25e-18	0.00119
TCGA-E7-A7PW-01	0.0370611	0.00675037	0.338	0.00881	0.000329
TCGA-XF-A9T8-01	0.0144115	0.00318005	0.368	0.0494	0.000348
TCGA-GC-A6I3-01	0.147144	0.00523542	3.28	0.137	0.00906
TCGA-CF-A27C-01	0.0935028	0.00200923	0.315	0.00867	8.47e-10
TCGA-E7-A7XN-01	0	0	0.273	0.0495	1.81e-08
TCGA-GC-A3RD-01	0.0729128	0.00189667	0.294	0.00232	7.95e-05
TCGA-R3-A69X-01	0.154751	0.0128634	6.54	0.0463	0.0104
TCGA-GV-A3JV-01	0.0743989	0.00651928	3.01	0.00838	0.00437
TCGA-E7-A97P-01	0	0	0.527	0.0276	4.44e-06
TCGA-BT-A20T-01	0.0939944	0.00398331	0.742	0	0.000155
TCGA-XF-A9SP-01	0.0598453	0.00853341	3.52	3.91e-19	0.00505
TCGA-BT-A20U-01	0.0815303	0.00821564	0.399	0.000858	0.00453
TCGA-FD-A43S-01	0.244263	0.0710993	32.6	0.499	0.0639
TCGA-DK-AA6P-01	0.0790607	0.0054591	0.712	0	0.00108
TCGA-4Z-AA84-01	0.0226193	0.0088076	0.771	0.0224	0.00139
TCGA-CU-A0YR-01	0.00981479	0.00407477	1.46	0.0515	0.00307
TCGA-E7-A8O7-01	0.139979	0.0102261	2.42	0.0311	0.00504
TCGA-LC-A66R-01	0.119025	0.0134478	6.41	0.117	0.0127
TCGA-DK-AA6X-01	0.165697	0.0176728	4.13	0.0729	0.00539
TCGA-E5-A4TZ-01	0.0474719	0.00535467	0.78	0.0396	0.00072
TCGA-XF-A8HG-01	0.029252	0.00683379	0.851	0.00274	0.00042
TCGA-K4-A6MB-01	0.0367002	0.00226025	0.489	1.52e-18	2.25e-06
TCGA-FD-A43Y-01	0.00612019	0.000776467	0.176	0.00895	2.91e-09
TCGA-LT-A5Z6-01	0.0525342	0.00460145	1.45	0.035	0.00248
TCGA-DK-A1AG-01	0.064582	0.00304273	0.389	2.81e-20	0.000736
TCGA-DK-A6B2-01	0.138576	0.00722245	2.66	0.0268	0.00257
TCGA-GU-A766-01	0	0.00189901	1.01	0.0773	0.0021
TCGA-GC-A3OO-01	0.0682315	0.00524949	3.03	0	0.00339
TCGA-GC-A3RC-01	0.000391941	0	0.665	0.0211	0.00073
TCGA-G2-A2EK-01	0.0941108	0.0123878	6.83	0.0774	0.0115
TCGA-XF-A9SK-01	0.150088	0.00899041	1.29	0.0287	0.000544
TCGA-DK-A1AE-01	0.0777354	0.022401	0.424	0.00387	0.00896
TCGA-BT-A2LB-01	0.0338432	0.00529671	2.22	0.0301	0.00264
TCGA-4Z-AA7M-01	0.0169017	0.0023558	0.956	0.0353	0.000962
TCGA-K4-A83P-01	0.527017	0.141907	77.2	0.71	0.143
TCGA-XF-A9T4-01	0.0459203	0.00250313	1	0.00194	0.000818
TCGA-S5-AA26-01	0.0463467	0.00328699	0.143	3.18e-21	8.75e-08
TCGA-PQ-A6FN-01	0.099686	0.00698617	4.07	0.101	0.00662
TCGA-DK-A1AB-01	0.0746827	0.0129097	1.47	0.0252	1.62e-07
TCGA-E7-A519-01	0.153766	0.00225762	0.749	0.0786	0.00262
TCGA-4Z-AA7Q-01	0.133957	0.00779414	4	0.104	0.00682
TCGA-FD-A3B4-01	0.125767	0.0248257	18.2	0.237	0.0217
TCGA-4Z-AA7O-01	0.0964297	0.00180305	3.02	0.0211	0.00469
TCGA-4Z-AA7R-01	0.0790917	0.00784594	0.766	0.00726	0.0019
TCGA-BT-A2LA-01	0.0634154	0.0123849	0.814	0	0.00169
TCGA-FJ-A3ZF-01	0.0509928	0.00995438	0.102	0.00642	0.000928
TCGA-5N-A9KM-01	0.113086	0.0109514	1.49	0.0335	0.00255
TCGA-DK-A1AF-01	0.0736765	0.00990959	3.38	0	0.00443
TCGA-G2-A3VY-01	0.0723673	0.0060466	1.22	0.0178	0.000943
TCGA-UY-A78K-01	0.239778	0.0368329	23.1	0.412	0.0419
TCGA-DK-A3IQ-01	0.0286223	0.00266735	0.347	0	7e-07
TCGA-K4-A5RJ-01	0.126052	0	0.568	0.0802	1.29e-05
TCGA-GC-A3WC-01	0.085606	0.06241	10.8	0.185	0.0366
TCGA-UY-A9PD-01	0.0127986	0.00353138	3.17	0.0356	0.00667
TCGA-BT-A20P-01	0.0616928	0.00265185	0.235	0.00386	1.34e-07
TCGA-XF-A8HI-01	0.0904473	0.00474118	0.958	0.00823	0.00154
TCGA-DK-A2I1-01	0.0833642	0.00684282	4.97	0.0859	0.00976
TCGA-DK-A3X2-01	0.0597169	0.00399333	0.342	0	4.72e-08
TCGA-FD-A3SM-01	0.060031	0.00361987	1.1	0	0.00129
TCGA-FD-A5C0-01	0.0517559	0.00374647	1.15	0.00371	0.00114
TCGA-DK-A1A7-01	0.0704662	0.0121108	3.52	0.135	0.00927
TCGA-CU-A3KJ-01	0.00886057	0.000519137	0.247	0.0256	0.00059
TCGA-CF-A9FL-01	0.0735533	0.00291793	1.27	0	0.00171
TCGA-XF-AAN7-01	0.0582185	0.00337059	1.95	3.47e-18	0.00167
TCGA-DK-AA6T-01	1.6627	0.469587	262	1.53	0.633
TCGA-FD-A6TB-01	0.293001	0.0662293	36.3	0.394	0.0543
TCGA-YC-A89H-01	0.0448442	0.00317963	0.753	0.0158	0.000824
TCGA-XF-A9T2-01	0	0	0.31	1.53e-19	0.000154
TCGA-GU-A42R-01	0.0855688	0.00271164	0.343	2.28e-19	4.09e-06
TCGA-DK-A1AA-01	0.0719067	0.00281668	0.612	5.16e-19	0.00127
TCGA-DK-AA6U-01	0.0741237	0.0029463	0.562	0.0212	0.00341
TCGA-BT-A20J-01	0.370522	0.0747924	4.83	0.195	0.00803
TCGA-GV-A40G-01	0.0462823	0.00198226	0.423	0	0.000288
TCGA-GV-A3JX-01	0.0917244	0.00693751	2.33	0.00554	0.00227
TCGA-GC-A3RB-01	0.102219	0.0111072	0.837	0	0.00132
TCGA-FD-A5BU-01	0.0954253	0.0115145	6.68	0.104	0.0102
TCGA-H4-A2HQ-01	0.150865	0.00272614	0.639	0.00741	0.000346
TCGA-ZF-AA54-01	0.100414	0.00656102	0.32	0.0464	0.00051
TCGA-BT-A20Q-01	0.109584	0.00711469	5.46	0.0493	0.00998
TCGA-ZF-AA4T-01	0.0692562	0.00550775	0.704	0.0101	0.000996
TCGA-FD-A3SR-01	0.0644279	0.0186049	2.53	0.0473	0.000465
TCGA-GV-A3JZ-01	0.0800167	0.00502228	0.994	2.57e-20	0.00154
TCGA-GU-A764-01	0.101736	0.00907968	5.77	0.0586	0.0115
TCGA-G2-A3IE-01	0.054828	0.00154984	1.08	0.0126	0.00205
TCGA-ZF-A9RN-01	0.198346	0.0382631	0.76	0.116	4.61e-09
TCGA-GV-A3QF-01	0.0928157	0.00425773	0.522	1.9e-18	0.000987
TCGA-DK-AA77-01	0.122073	0.00327966	0.495	0.00852	0.000727
TCGA-BT-A2LD-01	0.0735749	0	1.6	0.0174	0.00118
TCGA-GC-A3I6-01	0.0437363	0.00364766	0.317	0.0209	1.01e-07
TCGA-DK-A3WW-01	0.0578549	0.00067818	0.407	0.0965	0.000499
TCGA-FD-A43U-01	0.0397833	0.00752167	4.86	0.0837	0.0129
TCGA-GD-A3OS-01	0.0261709	0.00745986	0.746	0.0275	0.0034
TCGA-XF-A9SY-01	0	0.00874478	7.47	0.137	0.0133
TCGA-LT-A8JT-01	0.0684404	0.00417754	1.39	0.0182	0.00228
TCGA-ZF-A9R2-01	0.0939261	0.0022456	0.496	0.00208	0.000629
TCGA-K4-A3WV-01	0.09343	0.00593106	0.0661	0.00501	0.000568
TCGA-DK-A3IT-01	0.0914068	0.00813475	6.6	0.0631	0.00945
TCGA-GV-A3JW-01	0.0897158	0.00473936	2.11	0	0.00117
TCGA-GC-A3BM-01	0.0716191	0.00339372	0.558	0.00537	0.00226
TCGA-DK-A1A3-01	0.100476	0.00704113	2.04	0.0257	0.00121
TCGA-ZF-A9R7-01	0.105053	0.0192831	6.25	0.193	0.00856
TCGA-E7-A4IJ-01	0.0571005	0	0.799	0.0183	0.000707
TCGA-ZF-A9R0-01	0.0315912	0.0067392	0.838	0.0116	5.16e-05
TCGA-FD-A3N5-01	0.025156	0.00196486	0.152	0	3.43e-05
TCGA-UY-A78M-01	0.0721621	0.000803421	0.324	0	0.000348
TCGA-GV-A6ZA-01	0.088226	0.00405811	0.835	0.0164	0.000632
TCGA-G2-A2EC-01	0.0773223	0.00768737	4.36	0.0222	0.00903
TCGA-FD-A43N-01	0.0241442	0.00425662	1.41	0	0.0018
TCGA-C4-A0F6-01	0.0218967	0.00374411	2.09	0	0.00331
TCGA-DK-A3IU-01	0.258925	0.0795746	46	0.542	0.0703
TCGA-FD-A3SL-01	0.0128761	0.00680911	2.15	0	0.00335
TCGA-XF-A9SX-01	0.177826	0.00464359	1.88	0.0686	0.00336
TCGA-E7-A6ME-01	0.257041	0.00875749	1.63	0.054	0.00246
TCGA-2F-A9KO-01	0.14054	0.0142129	3.95	0.0904	0.00456
TCGA-FD-A3SJ-01	0.0737814	0.0116139	3.32	0.0493	0.00421
TCGA-E7-A6MF-01	0.0413472	0.00686466	0.307	0.0167	0.00299
TCGA-GC-A3YS-01	0.0285424	0.0032849	0.38	0.0134	5.03e-07
TCGA-K4-A3WS-01	0.0424346	0.0123891	5.22	0.0343	0.0063
TCGA-ZF-A9R1-01	0.137915	0.00607139	5.31	0.0658	0.00521
TCGA-E7-A541-01	0.0872533	0.00398235	1.55	0.0312	0.00203
TCGA-FD-A3SP-01	0.0534393	0.00664399	1.77	0.0533	0.0016
TCGA-BT-A3PJ-01	0.120267	0	1.28	0.0207	0.000834
TCGA-BT-A20N-01	0.0593584	0.00413681	0.343	0.00508	4.66e-05
TCGA-E7-A678-01	0.0844521	0.00244051	1.42	0.0275	0.0021
TCGA-XF-A9T0-01	0.0511534	0.00426697	2.72	0.0528	0.00511
TCGA-GD-A2C5-01	0.0595413	0.00560684	0.796	0	0.00167
TCGA-FD-A5BR-01	0.120883	0.0215248	13.5	0.125	0.0234
TCGA-G2-A2EL-01	0.0770824	0.00399349	0.857	0.0158	0.00139
TCGA-E7-A677-01	0.0501531	0.00614829	0.979	0.0177	0.00258
TCGA-XF-AAN4-01	0.0401503	0.00790554	3.81	0.00468	0.00736
TCGA-FD-A43P-01	0.118156	0.0157505	7.17	0.189	0.0106
TCGA-GV-A3QK-01	0.0672524	0.00491764	1.48	0.0348	0.00156
TCGA-FD-A5BZ-01	0.0228824	0.00589384	2.82	1.22e-18	0.00286
TCGA-4Z-AA7W-01	0.244507	0.000901692	3.73	0.144	0.00361
TCGA-K4-A54R-01	0.0122839	0	0.853	0.0137	1.98e-06
TCGA-FD-A3N6-01	0.0466411	0.00253934	0.412	0.0149	0.000875
TCGA-XF-A9SZ-01	0.124834	0.00334277	0.672	0.016	8.03e-08
TCGA-BT-A42F-01	0.0505253	0.00940488	6.33	0.159	0.0124
TCGA-ZF-A9R9-01	0.0247971	0.00589962	1.71	0.00375	0.00384
TCGA-BT-A42C-01	0.0813313	0.00550123	1.12	0.00483	0.00116
TCGA-FD-A3SN-01	0.0224798	0.00209594	1.07	0.0152	1.82e-07
TCGA-G2-AA3F-01	0.0578566	0.00274744	0.538	0.00375	0.00126
TCGA-ZF-AA5H-01	0.00208372	0.00452492	2.81	0.0529	0.00387
TCGA-UY-A9PB-01	0.0914488	0.0110129	6.72	0.0956	0.0121
TCGA-E7-A3X6-01	0.0592731	0.00128878	0.815	0.0153	0.00182
TCGA-CU-A3YL-01	0.0915343	0.00260769	0.74	0	0.0015
TCGA-ZF-A9R4-01	0.117048	0.00875941	0.527	0.0162	0.00199
TCGA-XF-AAN1-01	0.0714452	0.00336537	0.339	3.56e-05	0.000857
TCGA-FJ-A3Z7-01	0.018695	0.000529263	0.694	0	0.00121
TCGA-ZF-A9R3-01	0.0761372	0.0101314	2.54	0.0272	0.00476
TCGA-FD-A3B3-01	0.0606308	0.0131177	6.59	0.107	0.0111
TCGA-GU-A763-01	0.0642959	0.00182031	0.231	0.0069	5.94e-05
TCGA-GU-AATP-01	0.124649	0.00341229	1.08	0.0292	0.000291
TCGA-G2-A2ES-01	0.0351272	0.00433775	0.303	0.011	0.000635
TCGA-FD-A3B6-01	0.10132	0.0155848	0.941	0.0672	0.00132
TCGA-SY-A9G0-01	0.110719	0.0209486	14.2	0.0644	0.0167
TCGA-4Z-AA89-01	0.0769174	0.00211226	0.288	0.0073	0.00022
TCGA-ZF-AA4R-01	0.0535689	0.00649196	0.742	4.8e-19	6.83e-05
TCGA-XF-A9SM-01	0.231856	0.00871557	1.38	0.0989	0.00155
TCGA-4Z-AA7S-01	0.0821835	0.00224156	1.66	0.00157	0.00203
TCGA-UY-A9PA-01	0.0831726	0.00626548	0.874	0.00581	0.000876
TCGA-ZF-AA52-01	0.0502253	0.00346511	1.36	1.28e-19	0.000304
TCGA-ZF-A9R5-01	0.0817088	0.00627348	1.55	0.0192	0.00189
TCGA-KQ-A41P-01	0.0546278	0.0062034	0.845	1.11e-18	0.00088
TCGA-BT-A42E-01	0.0786826	0.00307063	0.409	0.0455	0.000123
TCGA-GV-A3QI-01	0.103815	0.010978	1.41	2.33e-18	0.00184
TCGA-DK-A6B6-01	0.0848768	0.0108026	2.97	0.0568	0.00583
TCGA-UY-A78L-01	0.0219768	0.00160113	0.165	0.00916	0.000477
TCGA-DK-AA6L-01	0.090985	0.00239029	0.378	0.0265	1.06e-07
TCGA-HQ-A2OE-01	0.0202108	0.00403115	0.859	0.0188	0.0015
TCGA-E5-A4U1-01	0.0553913	0.00212905	0.0975	0.00214	4.14e-06
TCGA-SY-A9G5-01	0	0.000657443	1.17	0.0428	2.03e-06
TCGA-BL-A0C8-01	0.0547059	0.00255109	0.53	0	0.00181
TCGA-4Z-AA81-01	0.0237712	0.0131967	0.849	0.0282	0.000821
TCGA-E5-A2PC-01	0.0542448	0.000552612	0.259	0.00783	4.91e-08
TCGA-XF-AAMZ-01	0.103585	0.00975312	7.24	0.134	0.012
TCGA-KQ-A41R-01	0.0439982	0.0031614	0.29	0	0.000479
TCGA-4Z-AA7N-01	0.705187	0.174449	118	0.89	0.171
TCGA-XF-A8HB-01	0.052797	0.00202094	0.308	0.00816	1.55e-05
TCGA-DK-A2HX-01	0.0161655	0.00261804	1.38	5.19e-18	0.000775
TCGA-FD-A3SQ-01	0.09605	0.0178471	7.51	0.0291	0.0109
TCGA-KQ-A41Q-01	0.0213971	0.00594271	0.291	0.0217	0.00101
TCGA-4Z-AA87-01	0.0200434	0.00306387	1.92	0.0375	0.00386
TCGA-ZF-A9RM-01	0.0936244	0.00512613	0.756	0.00707	0.00159
TCGA-G2-A2EJ-01	0	0.000342418	0.238	0.0166	3.08e-08
TCGA-4Z-AA7Y-01	0.0982111	0.00532032	0.711	0	0.00172
TCGA-DK-A3IS-01	0.105574	0.000378238	0.155	2.06e-19	0.000433
TCGA-KQ-A41O-01	0.0511128	0.000699043	0.269	0.000475	1.75e-06
TCGA-DK-A6B5-01	0.0575577	0.00379857	0.674	0.0128	0.000249
TCGA-4Z-AA82-01	0.0480697	0.00684401	1.48	0.00838	0.000454
TCGA-UY-A9PH-01	0.12105	0.00811266	4.33	0.0943	0.00855
TCGA-DK-AA6M-01	0.0906466	0.00560689	0.645	0.0159	0.000749
TCGA-KQ-A41N-01	0.0379018	0.00177996	0.194	0	1.22e-05
TCGA-DK-A6AW-01	0.0759646	0	0.31	4.27e-19	6.44e-09
TCGA-FD-A5BS-01	0.422738	0.0849026	41.3	0.452	0.108
TCGA-ZF-AA58-01	0.0369973	0.00709037	1.68	0.0903	0.00296
TCGA-XF-AAMJ-01	0.0359468	0.00828799	2.6	2.67e-19	0.00315
TCGA-DK-AA74-01	0.0856286	0.00343436	0.959	0.0272	0.000893
TCGA-ZF-AA51-01	0.0549594	0.00416496	3.33	0.044	0.00602
TCGA-XF-AAN0-01	0.0521004	0.00747792	2.27	0.0521	0.00417
TCGA-ZF-AA53-01	0	0.00172906	0.774	0.0405	0.00108
TCGA-FD-A5C1-01	0.182698	0.00169205	1.77	0.0791	0.0029
TCGA-G2-A2EO-01	0.068267	0.00444537	3.52	0.05	0.00525
TCGA-ZF-AA4V-01	0.111216	0.00457299	0.55	0.0285	0.000181
TCGA-ZF-AA4W-01	0.0604339	0.000542913	0.495	0.0137	0.000395
TCGA-FD-A3NA-01	0.0391461	0.0022416	0.504	0.0179	0.000125
TCGA-XF-AAN2-01	0.0647247	0.00619259	0.435	0.0221	0.000783
TCGA-G2-A2EF-01	0	0.0059769	0.792	0.0548	0.0013
TCGA-FD-A6TA-01	0.137533	0.0154612	7.52	0.136	0.0128
TCGA-HQ-A2OF-01	0.172011	0.00259388	0.388	0.00522	0.00109
TCGA-ZF-A9RF-01	0.176226	0.00707629	0.478	0.0609	8.97e-05
TCGA-DK-A6AV-01	0.0695008	0.0051231	2.54	0.0484	0.00463
TCGA-XF-A9SH-01	0.0650683	0.00456835	0.782	0	0.003
TCGA-G2-AA3B-01	0.0801031	0.00364426	1.62	0.026	0.00176
TCGA-DK-A3X1-01	0.0741859	0.000825398	0.205	0	0.000347
TCGA-DK-A1A6-01	0	0.000731419	0.164	0.0313	6.13e-07
TCGA-XF-A9SL-01	0.215463	0.0627956	23.8	0.278	0.0421
TCGA-4Z-AA83-01	0.0502029	0.00233856	0.231	0	2.75e-05
TCGA-XF-A9T5-01	0.478378	0.0231027	3.59	0.144	0.0069
TCGA-ZF-AA4X-01	0.0722	0.00776408	1.78	0.0142	0.00169
TCGA-DK-A6B1-01	0.0792389	0.00500704	1.07	3.43e-22	0.00238
TCGA-UY-A8OB-01	0.225669	0.00276583	0.077	0.0226	0.000294
TCGA-G2-AA3D-01	0.134972	0.0114181	3.04	0.0431	0.00339
TCGA-XF-AAMQ-01	0.0454706	0.00700511	2.56	0.0548	0.00489
TCGA-XF-AAN5-01	0.0472176	0.00459943	0.811	0.046	0.000672
TCGA-UY-A78O-01	0.0496261	0.00391294	1.72	0.0237	0.00279
TCGA-DK-A6B0-01	0.0764221	0.00401228	0.176	0	0.00112
TCGA-UY-A78P-01	0.0734822	0.00239255	1.97	0.0495	0.00282
TCGA-XF-A9SI-01	0.341446	0.162143	30	0.473	0.0522
TCGA-XF-AAN3-01	0.104419	0.00835439	0.221	0.0135	0.0016
TCGA-UY-A78N-01	0.0410783	0.00564244	0.119	7.87e-19	0.000627
TCGA-DK-A2I6-01	0.127357	0.0279806	0.101	0.000541	0.000334
TCGA-ZF-A9RL-01	0.0444414	0.00446836	1.35	0.0105	0.00253
TCGA-XF-AAMR-01	0.129219	0.0118175	1.25	8.65e-18	0.00186
TCGA-XF-AAME-01	0.149362	0.0457989	21.2	0.206	0.0366
TCGA-ZF-A9RC-01	0.0969267	0.00468829	0.406	2.49e-21	0.000349
TCGA-2F-A9KQ-01	0.0805521	0.00228567	0.114	0	1.4e-07
TCGA-XF-A8HF-01	0.0508257	0.00268341	1.02	1.78e-20	0.000624
TCGA-XF-A8HD-01	0.118448	0.0126277	1.37	0.0476	0.000497
TCGA-XF-AAMY-01	0.0379695	0.00685843	1.31	0	1.7e-07
TCGA-2F-A9KR-01	0.0917628	0.00161952	0.488	0.00724	3.24e-06
TCGA-2F-A9KT-01	0.0531748	0.000843082	0.0661	5.03e-21	8.29e-06
TCGA-XF-AAMG-01	0.0481328	0.00808859	0.455	0.00891	0.000735
TCGA-DK-A1AD-01	0.0115978	0.00323421	1.19	0.00236	0.00219
TCGA-UY-A8OD-01	0.0595975	0.0097666	3.04	0.0401	0.00547
TCGA-XF-A8HE-01	0.0504043	0.00131975	0.785	0.0354	0.000979
TCGA-DK-A1AC-01	0.0172193	0.000650734	1.38	0.0916	0.00288
TCGA-DK-A2I4-01	0.0350013	0.0134345	4.88	0.0912	0.00692
TCGA-DK-A3WY-01	2.08683	0.600047	346	1.43	0.514
TCGA-DK-AA6R-01	0	0.00201004	0.421	0	1.95e-09
TCGA-DK-AA6S-01	0.0301687	0.00756318	0.422	0.011	6.07e-05
