# Supplementary material for: Construction and experimental validation of a B cell-related gene signature to predict the prognosis and immunotherapeutic sensitivity in bladder cancer
Source: Aging (Albany NY). 2023 Jun 27;15(12):5355–80. doi: 10.18632/aging.204753 (PMC10333061; doi:10.18632/aging.204753)
Supplement: Supplementary Table 4 [file aging-15-204753-s004.xlsx]

## Sheet: Sheet1
Supplementary Table 4. The cell marker genes of the cells in the tumor microenvironment of BLCA.
gene	Cell_type	p_val	avg_log2FC	pct.1	pct.2	p_val_adj
CD3D	T_cells	5.08347e-302	3.41164	0.811	0.03	7.2353e-298
CD2	T_cells	2.21436e-268	3.24175	0.757	0.035	3.15171e-264
CD3E	T_cells	1.54953e-261	3.08765	0.673	0.012	2.20545e-257
TRAC	T_cells	1.24516e-226	3.38207	0.884	0.171	1.77224e-222
IL32	T_cells	3.90808e-195	2.68403	0.943	0.382	5.56237e-191
GZMA	T_cells	1.94752e-190	3.1331	0.562	0.025	2.7719e-186
TRBC1	T_cells	5.41619e-188	3.09416	0.565	0.027	7.70886e-184
PTPRC	T_cells	8.07893e-186	2.47699	0.832	0.183	1.14987e-181
CD52	T_cells	1.13581e-185	2.63185	0.822	0.157	1.6166e-181
LCK	T_cells	1.25204e-183	2.67091	0.549	0.025	1.78203e-179
CORO1A	T_cells	1.22799e-168	2.3829	0.83	0.213	1.7478e-164
CXCR4	T_cells	1.04696e-166	2.62036	0.819	0.197	1.49015e-162
B2M	T_cells	1.93225e-166	0.754133	1	1	2.75017e-162
CCL5	T_cells	1.1003e-164	3.2634	0.619	0.07	1.56606e-160
HLA-C	T_cells	1.08548e-163	0.83273	0.997	0.988	1.54496e-159
CD7	T_cells	3.01341e-163	2.61411	0.489	0.021	4.28899e-159
TMSB4X	T_cells	4.22256e-160	0.720492	1	1	6.00997e-156
HLA-A	T_cells	7.76366e-160	0.907593	0.984	0.989	1.105e-155
RPL28	T_cells	3.50855e-158	0.773733	0.997	0.996	4.99371e-154
RPS27	T_cells	1.01617e-156	0.899802	0.992	0.998	1.44632e-152
HLA-B	T_cells	3.67115e-156	0.818617	0.995	0.989	5.22515e-152
RPS15A	T_cells	4.07253e-155	0.876614	0.992	0.99	5.79644e-151
MALAT1	T_cells	4.00841e-154	0.796142	1	0.99	5.70517e-150
RPS29	T_cells	5.27682e-154	1.00804	0.984	0.984	7.5105e-150
RPL13A	T_cells	2.93972e-153	0.743211	1	0.999	4.1841e-149
CD3G	T_cells	7.08911e-153	2.38702	0.427	0.01	1.00899e-148
BTG1	T_cells	1.20006e-152	1.40294	0.965	0.886	1.70805e-148
GZMK	T_cells	3.75766e-151	2.98321	0.457	0.019	5.34827e-147
RPL10	T_cells	1.17095e-147	0.712766	1	0.999	1.66661e-143
EEF1A1	T_cells	4.34896e-146	0.670067	1	0.999	6.18988e-142
RPS3	T_cells	6.90597e-146	0.775835	0.992	0.996	9.82927e-142
RPLP2	T_cells	5.4822e-145	0.800158	0.995	0.998	7.80281e-141
RPL13	T_cells	1.55701e-144	0.752348	0.995	1	2.21609e-140
RPL23A	T_cells	3.62863e-144	0.805307	0.995	0.995	5.16463e-140
HSP90AA1	T_cells	5.78523e-144	1.00641	0.986	0.982	8.23412e-140
RPS2	T_cells	1.42615e-143	0.712607	0.995	0.997	2.02984e-139
RPS19	T_cells	8.88517e-143	0.696921	0.995	0.998	1.26463e-138
RPLP1	T_cells	3.10885e-142	0.660663	0.995	0.999	4.42482e-138
RPL27A	T_cells	6.27081e-141	0.78361	0.995	0.996	8.92524e-137
RPL21	T_cells	6.47154e-141	0.768211	0.995	0.998	9.21095e-137
RPS15	T_cells	1.87986e-140	0.691806	0.992	0.996	2.6756e-136
RPS27A	T_cells	3.07863e-140	0.74984	0.992	0.999	4.38181e-136
RPL41	T_cells	4.03966e-138	0.688643	0.995	0.999	5.74965e-134
RPS16	T_cells	3.81478e-137	0.738542	0.989	0.989	5.42958e-133
RPS26	T_cells	2.18446e-136	0.848201	0.965	0.971	3.10914e-132
RPL30	T_cells	2.94171e-136	0.817595	0.989	0.994	4.18693e-132
GSN	T_cells	3.79159e-135	-2.27798	0.035	0.859	5.39657e-131
RPL19	T_cells	5.0595e-135	0.681139	0.995	0.997	7.20118e-131
RPS12	T_cells	8.09869e-135	0.754065	0.997	0.994	1.15269e-130
RPL34	T_cells	3.80206e-134	0.745218	0.997	0.998	5.41148e-130
EIF1	T_cells	5.74043e-134	0.739354	0.981	0.992	8.17035e-130
RPS25	T_cells	5.89925e-134	0.79404	0.984	0.994	8.3964e-130
RPS7	T_cells	3.13787e-133	0.736688	0.984	0.986	4.46613e-129
RPL15	T_cells	6.54928e-132	0.612611	0.995	0.995	9.32159e-128
LTB	T_cells	1.32397e-131	2.45056	0.641	0.113	1.88441e-127
RPL11	T_cells	5.62045e-131	0.682173	0.995	0.997	7.99958e-127
RPS20	T_cells	1.08271e-130	0.730848	0.986	0.994	1.54102e-126
RPL18A	T_cells	5.4837e-130	0.692879	0.992	0.996	7.80496e-126
RPS14	T_cells	4.2855e-129	0.700902	0.984	0.998	6.09956e-125
HSPA8	T_cells	4.7295e-128	1.04035	0.938	0.943	6.7315e-124
RPS18	T_cells	5.42485e-128	0.698391	0.997	0.997	7.72119e-124
RPS6	T_cells	5.83378e-128	0.710145	0.992	0.996	8.30322e-124
RPL39	T_cells	5.16458e-127	0.758103	0.981	0.991	7.35075e-123
RPL14	T_cells	3.36679e-126	0.75938	0.978	0.988	4.79195e-122
RPSA	T_cells	6.16941e-126	0.794724	0.965	0.964	8.78092e-122
RPL18	T_cells	1.28759e-125	0.688261	0.984	0.988	1.83263e-121
RPL32	T_cells	6.25288e-125	0.66599	0.986	0.998	8.89972e-121
UBB	T_cells	7.17463e-125	0.761985	0.965	0.982	1.02117e-120
RPL35A	T_cells	1.26996e-124	0.684798	0.989	0.996	1.80754e-120
RPS4X	T_cells	1.69174e-124	0.67292	0.984	0.996	2.40786e-120
ACTB	T_cells	3.59772e-123	0.51649	1	1	5.12064e-119
RPS3A	T_cells	9.73043e-123	0.680978	0.989	0.996	1.38493e-118
CD48	T_cells	1.89612e-122	2.2807	0.576	0.094	2.69875e-118
RPL9	T_cells	2.87466e-122	0.681864	0.981	0.993	4.0915e-118
HCST	T_cells	4.3006e-122	2.26241	0.657	0.155	6.12104e-118
RPL3	T_cells	8.51587e-122	0.680098	0.986	0.996	1.21206e-117
RPL26	T_cells	1.75284e-121	0.672222	0.986	0.994	2.49482e-117
CST7	T_cells	2.0515e-121	2.55348	0.57	0.099	2.9199e-117
RPL31	T_cells	2.82081e-121	0.768294	0.976	0.989	4.01486e-117
TPT1	T_cells	1.10598e-119	0.610723	0.986	0.994	1.57414e-115
KLRB1	T_cells	1.17367e-119	2.50529	0.341	0.008	1.67048e-115
RPL6	T_cells	2.61358e-119	0.683695	0.978	0.99	3.71991e-115
RPS24	T_cells	4.4998e-118	0.620112	0.984	0.996	6.40456e-114
FAU	T_cells	4.97519e-118	0.689553	0.976	0.991	7.08119e-114
RPS28	T_cells	2.31698e-117	0.675702	0.978	0.991	3.29775e-113
DNAJB1	T_cells	2.40409e-117	1.47971	0.911	0.802	3.42174e-113
MT-CO1	T_cells	1.46935e-116	0.571038	0.995	0.974	2.09133e-112
PTMA	T_cells	3.20004e-116	0.563537	0.997	0.998	4.55461e-112
CD27	T_cells	1.20086e-114	2.23267	0.384	0.022	1.70918e-110
CST3	T_cells	7.93424e-114	-1.7597	0.227	0.955	1.12928e-109
RAB13	T_cells	1.06348e-113	-1.97973	0.019	0.758	1.51366e-109
IFITM3	T_cells	5.75695e-112	-1.75822	0.224	0.955	8.19387e-108
GRN	T_cells	9.77758e-112	-1.92375	0.059	0.818	1.39164e-107
RPS8	T_cells	2.66323e-111	0.641923	0.989	0.992	3.79058e-107
H3F3B	T_cells	2.69295e-111	0.699328	0.965	0.984	3.83288e-107
CD69	T_cells	2.69733e-111	2.28952	0.603	0.12	3.83911e-107
RPS23	T_cells	1.16915e-110	0.634624	0.986	0.995	1.66406e-106
RPS17	T_cells	4.50722e-109	0.608669	0.973	0.989	6.41512e-105
RPL10A	T_cells	5.65273e-109	0.665946	0.97	0.989	8.04553e-105
RPS13	T_cells	2.64424e-107	0.641167	0.984	0.996	3.76355e-103
RPL12	T_cells	4.65831e-107	0.61544	0.976	0.995	6.63017e-103
RPL7	T_cells	5.26434e-107	0.611299	0.981	0.995	7.49274e-103
NKG7	T_cells	6.90818e-107	2.83272	0.422	0.043	9.83242e-103
RPS9	T_cells	9.04647e-107	0.587347	0.981	0.997	1.28758e-102
UBC	T_cells	8.24737e-106	0.705007	0.959	0.985	1.17385e-101
SRGN	T_cells	1.18632e-105	1.38055	0.908	0.645	1.68849e-101
APP	T_cells	3.84699e-105	-1.82597	0.035	0.758	5.47542e-101
CYTIP	T_cells	5.72384e-105	2.26544	0.565	0.119	8.14674e-101
IL2RG	T_cells	1.15439e-104	2.23542	0.549	0.111	1.64304e-100
RPL29	T_cells	3.46185e-104	0.581833	0.981	0.994	4.92725e-100
PFN1	T_cells	6.70915e-103	0.647222	0.941	0.965	9.54914e-99
DDX5	T_cells	8.06926e-103	0.81795	0.93	0.957	1.1485e-98
RPL8	T_cells	5.05877e-102	0.55883	0.97	0.996	7.20015e-98
RPS11	T_cells	1.12305e-101	0.633026	0.962	0.982	1.59844e-97
IGFBP4	T_cells	2.35779e-101	-1.92374	0.054	0.768	3.35584e-97
ARHGDIB	T_cells	3.57696e-101	1.50742	0.851	0.615	5.09108e-97
CD59	T_cells	8.68628e-101	-1.74482	0.135	0.881	1.23632e-96
SPOCK2	T_cells	1.15236e-100	2.02294	0.354	0.024	1.64016e-96
RPS5	T_cells	2.28425e-100	0.602587	0.973	0.988	3.25117e-96
GNB2L1	T_cells	6.36313e-100	0.597458	0.957	0.988	9.05665e-96
HSP90AB1	T_cells	7.74844e-100	0.770769	0.938	0.982	1.10284e-95
RPL24	T_cells	4.02562e-99	0.599354	0.954	0.984	5.72966e-95
RPL35	T_cells	1.92519e-98	0.586851	0.949	0.988	2.74012e-94
ACAP1	T_cells	2.37581e-98	2.29268	0.524	0.106	3.38149e-94
WBP5	T_cells	3.30976e-98	-1.81613	0.03	0.718	4.71079e-94
CD247	T_cells	2.18819e-97	1.91159	0.289	0.009	3.11446e-93
RPL5	T_cells	6.53548e-97	0.626319	0.959	0.979	9.30195e-93
UBA52	T_cells	1.02335e-96	0.619294	0.943	0.977	1.45654e-92
IFNG	T_cells	4.65328e-95	2.40118	0.3	0.013	6.62301e-91
IGFBP7	T_cells	1.09513e-94	-1.7888	0.238	0.877	1.5587e-90
DNAJA1	T_cells	1.7495e-94	1.1728	0.878	0.886	2.49006e-90
ACTN1	T_cells	3.69264e-94	-1.74709	0.038	0.715	5.25574e-90
EEF1D	T_cells	7.64464e-94	0.702167	0.919	0.964	1.08806e-89
RPL37	T_cells	8.00185e-94	0.670914	0.941	0.981	1.1389e-89
RPL27	T_cells	1.29597e-93	0.645259	0.949	0.981	1.84456e-89
SH2D1A	T_cells	7.46902e-93	1.83632	0.268	0.006	1.06307e-88
PPIC	T_cells	2.27759e-92	-1.80797	0.014	0.662	3.2417e-88
HSPA1A	T_cells	3.71521e-92	1.05604	0.889	0.941	5.28786e-88
CALD1	T_cells	4.43955e-92	-2.08117	0.054	0.717	6.31882e-88
TRBC2	T_cells	5.47581e-92	2.48543	0.654	0.259	7.79372e-88
RPL7A	T_cells	5.97225e-92	0.556872	0.959	0.985	8.50031e-88
RPL4	T_cells	9.32036e-92	0.69613	0.903	0.954	1.32657e-87
S100A4	T_cells	1.20418e-90	1.37101	0.862	0.64	1.71391e-86
MT-ND2	T_cells	1.54426e-90	0.572388	0.976	0.968	2.19795e-86
FCGRT	T_cells	3.08077e-90	-1.82441	0.03	0.682	4.38486e-86
TNFRSF1A	T_cells	3.64704e-90	-1.45569	0.049	0.725	5.19084e-86
DOK2	T_cells	4.2139e-90	2.09883	0.546	0.138	5.99764e-86
CD151	T_cells	7.45508e-89	-1.5966	0.116	0.832	1.06108e-84
RPL23	T_cells	3.22749e-88	0.619055	0.927	0.977	4.59368e-84
PDLIM1	T_cells	4.04785e-88	-1.79255	0.046	0.698	5.76131e-84
IL7R	T_cells	1.81947e-87	2.36127	0.527	0.131	2.58965e-83
CD9	T_cells	1.5991e-86	-1.65309	0.095	0.777	2.276e-82
EVL	T_cells	2.57092e-86	2.19095	0.608	0.211	3.65919e-82
RPL36	T_cells	8.10765e-86	0.59553	0.935	0.988	1.15396e-81
SPARC	T_cells	1.11288e-85	-1.85936	0.086	0.735	1.58396e-81
PMP22	T_cells	2.77796e-85	-1.62233	0.024	0.653	3.95388e-81
MARCKS	T_cells	3.75508e-85	-1.73157	0.022	0.646	5.3446e-81
PTRF	T_cells	3.85074e-85	-1.77277	0.024	0.652	5.48076e-81
NNMT	T_cells	5.21413e-84	-1.92013	0.035	0.657	7.42127e-80
TSC22D1	T_cells	6.6396e-84	-1.5954	0.086	0.754	9.45015e-80
CD96	T_cells	1.08538e-83	1.88341	0.289	0.018	1.54483e-79
TCEAL4	T_cells	5.68807e-83	-1.37206	0.046	0.686	8.09583e-79
TIGIT	T_cells	8.68566e-83	1.85227	0.265	0.012	1.23623e-78
RPLP0	T_cells	7.39792e-82	0.544187	0.932	0.978	1.05295e-77
GNG11	T_cells	8.32423e-82	-1.88474	0.032	0.647	1.18479e-77
PRKCDBP	T_cells	1.26912e-81	-1.86426	0.024	0.632	1.80634e-77
NACA	T_cells	6.3095e-81	0.510789	0.93	0.985	8.98032e-77
SERPINB6	T_cells	1.27923e-80	-1.29699	0.043	0.67	1.82073e-76
RGS1	T_cells	1.49815e-80	1.98424	0.584	0.171	2.13232e-76
NGFRAP1	T_cells	2.84432e-80	-1.43129	0.076	0.734	4.04833e-76
CD37	T_cells	3.02455e-80	1.74866	0.603	0.187	4.30485e-76
ADIRF	T_cells	3.77158e-80	-2.09962	0.041	0.644	5.36809e-76
CFL1	T_cells	1.85787e-79	0.501929	0.924	0.961	2.6443e-75
CNN3	T_cells	5.99131e-79	-1.71703	0.03	0.628	8.52743e-75
YBX3	T_cells	1.38494e-78	-1.39682	0.068	0.703	1.97119e-74
TAX1BP3	T_cells	2.58748e-78	-1.50098	0.051	0.677	3.68276e-74
HLA-E	T_cells	3.88598e-78	0.885306	0.886	0.92	5.53091e-74
ASPH	T_cells	6.68526e-78	-1.46098	0.016	0.601	9.51513e-74
EMP1	T_cells	8.38307e-78	-1.61156	0.022	0.613	1.19316e-73
CYB5R3	T_cells	1.15199e-77	-1.30194	0.068	0.704	1.63963e-73
CAV1	T_cells	1.43644e-77	-1.85865	0.024	0.612	2.04448e-73
RCN1	T_cells	3.53562e-77	-1.49696	0.03	0.624	5.03225e-73
BRI3	T_cells	9.13437e-77	-1.34676	0.035	0.634	1.30009e-72
MGST2	T_cells	3.89623e-76	-1.43245	0.032	0.628	5.54551e-72
TSPAN4	T_cells	9.88605e-76	-1.55108	0.011	0.581	1.40708e-71
LEPROT	T_cells	1.11949e-75	-1.1247	0.089	0.74	1.59337e-71
CTSL	T_cells	1.28502e-75	-1.39158	0.035	0.629	1.82897e-71
RHOH	T_cells	1.29955e-75	1.88341	0.376	0.055	1.84965e-71
CYR61	T_cells	2.27283e-75	-2.0881	0.011	0.575	3.23492e-71
EMP2	T_cells	2.97941e-75	-1.44068	0.016	0.589	4.24059e-71
CTSB	T_cells	5.68188e-75	-1.45431	0.146	0.801	8.08702e-71
RPL38	T_cells	1.58563e-74	0.667257	0.881	0.965	2.25682e-70
MYL9	T_cells	5.76199e-74	-1.86451	0.043	0.624	8.20104e-70
LAPTM4A	T_cells	1.62408e-73	-1.29448	0.219	0.912	2.31156e-69
HNRNPA1	T_cells	2.78304e-73	0.631666	0.873	0.952	3.96111e-69
NPC2	T_cells	1.95878e-72	-1.312	0.203	0.869	2.78793e-68
PRF1	T_cells	1.30869e-71	1.91005	0.254	0.016	1.86266e-67
SH3BGRL3	T_cells	2.0968e-71	0.727737	0.865	0.882	2.98438e-67
DUSP2	T_cells	2.22433e-71	2.03904	0.605	0.245	3.16589e-67
HSPE1	T_cells	6.18751e-71	1.09071	0.824	0.861	8.80668e-67
TIMP3	T_cells	1.0897e-70	-1.83558	0.019	0.567	1.55097e-66
RRBP1	T_cells	1.10671e-70	-1.29306	0.051	0.64	1.57518e-66
PLD3	T_cells	2.78764e-70	-1.34205	0.043	0.616	3.96765e-66
TPM1	T_cells	3.0641e-70	-1.61598	0.068	0.65	4.36114e-66
PDLIM7	T_cells	1.41071e-69	-1.48016	0.03	0.587	2.00787e-65
PVRL2	T_cells	1.78454e-69	-1.43197	0.016	0.558	2.53993e-65
RAB34	T_cells	3.4483e-69	-1.32946	0.027	0.582	4.90796e-65
PRDX4	T_cells	3.56667e-69	-1.28262	0.065	0.655	5.07645e-65
CTNNA1	T_cells	3.90624e-69	-1.17772	0.041	0.609	5.55975e-65
DUSP1	T_cells	5.79652e-69	0.895938	0.895	0.876	8.25019e-65
CD53	T_cells	9.38405e-69	1.68819	0.543	0.179	1.33563e-64
TCF4	T_cells	5.28386e-68	-1.70732	0.008	0.534	7.52051e-64
S100A13	T_cells	5.65858e-68	-1.44491	0.092	0.69	8.05386e-64
SARAF	T_cells	6.43344e-68	1.22702	0.786	0.794	9.15671e-64
OAZ2	T_cells	3.05315e-67	-1.04903	0.065	0.645	4.34555e-63
TGFBI	T_cells	3.76709e-67	-1.65542	0.076	0.646	5.3617e-63
S100A16	T_cells	7.98158e-67	-1.52333	0.078	0.656	1.13602e-62
MDK	T_cells	1.14188e-66	-1.59934	0.038	0.581	1.62523e-62
SERPING1	T_cells	3.21166e-66	-1.92045	0.016	0.54	4.57115e-62
SAMSN1	T_cells	5.81645e-66	1.80608	0.454	0.113	8.27856e-62
BIRC3	T_cells	7.26059e-66	2.00338	0.511	0.162	1.0334e-61
PTTG1IP	T_cells	8.34692e-66	-1.11339	0.089	0.689	1.18802e-61
GAS6	T_cells	1.15689e-65	-1.41318	0.016	0.539	1.6466e-61
CLU	T_cells	7.03527e-65	-1.72963	0.065	0.609	1.00133e-60
CD81	T_cells	9.22108e-65	-1.06933	0.062	0.628	1.31244e-60
APLP2	T_cells	1.61704e-64	-1.22309	0.1	0.702	2.30154e-60
PTMS	T_cells	1.8127e-64	-1.12525	0.159	0.816	2.58001e-60
HES1	T_cells	5.91158e-64	-1.59531	0.022	0.54	8.41395e-60
CD40	T_cells	3.63529e-63	-1.23536	0.024	0.543	5.17411e-59
PGRMC1	T_cells	4.1595e-63	-1.11814	0.032	0.56	5.92021e-59
RGCC	T_cells	1.64318e-62	2.06618	0.597	0.282	2.33874e-58
CRIP2	T_cells	1.97857e-62	-1.42935	0.049	0.582	2.8161e-58
CALM1	T_cells	3.16945e-62	0.695107	0.816	0.908	4.51107e-58
IFI27	T_cells	7.93774e-62	-1.53709	0.116	0.666	1.12978e-57
TIMP2	T_cells	9.06892e-62	-1.37803	0.008	0.503	1.29078e-57
PKIG	T_cells	1.12665e-61	-1.3495	0.011	0.505	1.60356e-57
PPFIBP1	T_cells	2.7493e-61	-1.32013	0.011	0.506	3.91308e-57
PLS3	T_cells	2.82164e-61	-1.27062	0.016	0.517	4.01605e-57
ID3	T_cells	3.09219e-61	-1.12406	0.17	0.782	4.40111e-57
CSRP1	T_cells	9.99234e-61	-1.1612	0.057	0.592	1.42221e-56
KLF6	T_cells	1.72943e-60	1.1342	0.795	0.785	2.46149e-56
LAT	T_cells	1.9468e-60	1.70383	0.297	0.041	2.77088e-56
CALU	T_cells	2.02147e-60	-1.18628	0.068	0.613	2.87716e-56
TUBB6	T_cells	3.24241e-60	-1.27644	0.019	0.515	4.61492e-56
MMP14	T_cells	3.69221e-60	-1.39792	0.014	0.506	5.25513e-56
ATOX1	T_cells	5.61215e-60	-0.940013	0.114	0.706	7.98777e-56
HSBP1	T_cells	5.7812e-60	-0.94905	0.141	0.763	8.22839e-56
DST	T_cells	1.04502e-59	-1.33731	0.005	0.486	1.48738e-55
HTRA1	T_cells	1.49779e-59	-1.45673	0.019	0.51	2.1318e-55
IFNGR2	T_cells	1.53651e-59	-1.12783	0.022	0.516	2.18691e-55
ENG	T_cells	1.69269e-59	-1.50523	0.022	0.514	2.40921e-55
PRSS23	T_cells	4.07228e-59	-1.36424	0.038	0.545	5.79608e-55
CAV2	T_cells	4.4237e-59	-1.42187	0.016	0.501	6.29626e-55
PSMB5	T_cells	4.89051e-59	-0.963052	0.132	0.742	6.96066e-55
CTSZ	T_cells	7.44393e-59	-1.19738	0.062	0.592	1.05949e-54
SKAP1	T_cells	9.64209e-59	1.82478	0.292	0.042	1.37236e-54
RPL22	T_cells	1.24069e-58	0.513622	0.868	0.971	1.76587e-54
PFDN5	T_cells	1.29182e-58	0.516006	0.876	0.973	1.83865e-54
TINAGL1	T_cells	1.37981e-58	-1.6089	0.038	0.54	1.96388e-54
DSTN	T_cells	1.85257e-58	-1.15911	0.211	0.845	2.63676e-54
FSCN1	T_cells	8.21479e-58	-1.50327	0.032	0.526	1.16921e-53
FAM213A	T_cells	9.3911e-58	-1.25762	0.008	0.48	1.33664e-53
PRCP	T_cells	1.42336e-57	-1.36317	0.035	0.528	2.02586e-53
MYL12A	T_cells	1.52671e-57	0.516145	0.843	0.953	2.17296e-53
CYBA	T_cells	1.57722e-57	0.723918	0.849	0.829	2.24486e-53
COL4A1	T_cells	1.5854e-57	-1.47094	0.005	0.473	2.2565e-53
MGP	T_cells	2.69386e-57	-1.88219	0.062	0.549	3.83417e-53
IER3	T_cells	2.90299e-57	-1.1832	0.07	0.596	4.13183e-53
CFH	T_cells	3.9302e-57	-1.34534	0.005	0.471	5.59385e-53
PON2	T_cells	4.00327e-57	-1.16584	0.027	0.513	5.69786e-53
SPTSSA	T_cells	6.6192e-57	-0.941805	0.032	0.527	9.42111e-53
KDELR1	T_cells	9.0019e-57	-0.921522	0.114	0.69	1.28124e-52
PEA15	T_cells	1.01668e-56	-1.02737	0.03	0.52	1.44704e-52
CLEC2D	T_cells	1.19052e-56	2.03313	0.422	0.123	1.69446e-52
FKBP2	T_cells	1.82645e-56	-0.801547	0.138	0.74	2.59958e-52
SOX4	T_cells	1.92729e-56	-1.05295	0.076	0.602	2.74311e-52
SLC39A1	T_cells	2.68988e-56	-0.823549	0.084	0.626	3.82851e-52
TM4SF1	T_cells	3.04033e-56	-1.81251	0.027	0.5	4.32731e-52
UQCRB	T_cells	3.35415e-56	0.638267	0.824	0.93	4.77397e-52
TRIP6	T_cells	3.59027e-56	-1.0984	0.016	0.487	5.11003e-52
RPS10	T_cells	3.75e-56	0.695201	0.811	0.923	5.33737e-52
SCPEP1	T_cells	4.80583e-56	-1.04961	0.038	0.529	6.84014e-52
VCAN	T_cells	5.45174e-56	-1.63992	0.008	0.466	7.75946e-52
HSD17B12	T_cells	6.29296e-56	-0.939334	0.041	0.536	8.95677e-52
GLUL	T_cells	8.7717e-56	-1.08255	0.084	0.613	1.24848e-51
EI24	T_cells	9.79365e-56	-0.888296	0.054	0.565	1.39393e-51
CPE	T_cells	1.13417e-55	-1.43104	0.019	0.486	1.61427e-51
CTSH	T_cells	2.13639e-55	-1.1612	0.078	0.602	3.04073e-51
AP2S1	T_cells	3.54806e-55	-0.964701	0.17	0.788	5.04995e-51
TBC1D10C	T_cells	3.62423e-55	1.68521	0.284	0.042	5.15837e-51
PTPN7	T_cells	6.65279e-55	1.80809	0.327	0.063	9.46891e-51
FYB	T_cells	8.42885e-55	1.82017	0.451	0.15	1.19968e-50
OS9	T_cells	8.43949e-55	-0.839799	0.127	0.707	1.20119e-50
HYAL2	T_cells	8.63906e-55	-1.36509	0.008	0.46	1.2296e-50
LGALS3BP	T_cells	8.77885e-55	-1.14835	0.1	0.643	1.24949e-50
VKORC1	T_cells	9.07117e-55	-0.821945	0.127	0.709	1.2911e-50
EPHX1	T_cells	1.16794e-54	-1.26164	0.005	0.455	1.66233e-50
NPM1	T_cells	1.45643e-54	0.544258	0.819	0.935	2.07294e-50
SCARB2	T_cells	1.91274e-54	-0.943214	0.035	0.515	2.7224e-50
COL4A2	T_cells	2.96078e-54	-1.31363	0.019	0.479	4.21407e-50
SPARCL1	T_cells	3.62455e-54	-2.24728	0.022	0.473	5.15883e-50
TRAF3IP3	T_cells	4.04071e-54	1.71859	0.3	0.051	5.75114e-50
RAB31	T_cells	5.40414e-54	-1.30718	0.003	0.446	7.69172e-50
GNAI2	T_cells	5.49186e-54	-0.869099	0.1	0.644	7.81656e-50
DUSP23	T_cells	7.1493e-54	-1.00537	0.086	0.611	1.01756e-49
CREG1	T_cells	8.75912e-54	-1.07517	0.032	0.504	1.24669e-49
TGM2	T_cells	1.11588e-53	-1.43357	0.027	0.491	1.58824e-49
FAM114A1	T_cells	1.16973e-53	-1.18872	0.008	0.455	1.66487e-49
A2M	T_cells	1.57679e-53	-1.74144	0.024	0.483	2.24425e-49
IL13RA1	T_cells	1.82323e-53	-1.06461	0.005	0.449	2.595e-49
HDLBP	T_cells	3.77137e-53	-0.827996	0.057	0.552	5.3678e-49
FSTL1	T_cells	3.95014e-53	-1.34318	0.008	0.45	5.62223e-49
LSP1	T_cells	3.97921e-53	1.57043	0.516	0.204	5.6636e-49
CTHRC1	T_cells	7.09963e-53	-1.58927	0.059	0.542	1.01049e-48
MTCH1	T_cells	7.3525e-53	-0.785578	0.127	0.698	1.04648e-48
NUCB1	T_cells	1.24103e-52	-0.782878	0.162	0.766	1.76636e-48
HEBP1	T_cells	1.43028e-52	-0.874915	0.038	0.51	2.03571e-48
ASAH1	T_cells	1.60224e-52	-0.980536	0.073	0.575	2.28046e-48
RAB32	T_cells	1.79166e-52	-1.17653	0.008	0.449	2.55007e-48
CACYBP	T_cells	1.87986e-52	1.42411	0.711	0.649	2.67561e-48
C1R	T_cells	2.34084e-52	-1.68712	0.022	0.47	3.33172e-48
PDLIM4	T_cells	2.96794e-52	-1.33154	0.016	0.462	4.22428e-48
CAPNS1	T_cells	4.22e-52	-0.902788	0.062	0.557	6.00632e-48
AXL	T_cells	4.41123e-52	-1.1824	0.014	0.458	6.27851e-48
ZFYVE21	T_cells	4.87864e-52	-0.958073	0.024	0.479	6.94376e-48
COPRS	T_cells	5.74383e-52	-0.96044	0.014	0.457	8.17519e-48
FLOT1	T_cells	6.19608e-52	-0.751476	0.097	0.631	8.81888e-48
RDX	T_cells	8.35722e-52	-0.867495	0.092	0.612	1.18948e-47
CD63	T_cells	8.93141e-52	-0.922545	0.446	0.975	1.27121e-47
UACA	T_cells	1.04707e-51	-1.1879	0.005	0.438	1.49029e-47
LAPTM5	T_cells	1.53086e-51	1.20582	0.724	0.477	2.17887e-47
PSAP	T_cells	1.99535e-51	-0.979053	0.268	0.895	2.83999e-47
CLTA	T_cells	2.02921e-51	-0.89102	0.192	0.814	2.88818e-47
ATP6AP1	T_cells	2.3889e-51	-0.730242	0.073	0.578	3.40012e-47
NRP2	T_cells	2.72408e-51	-1.18244	0.005	0.433	3.87718e-47
LTBR	T_cells	3.85837e-51	-0.990501	0.014	0.452	5.49162e-47
SYPL1	T_cells	4.54758e-51	-0.768704	0.114	0.657	6.47257e-47
KLF4	T_cells	5.15822e-51	-1.37276	0.019	0.46	7.3417e-47
JUNB	T_cells	5.59894e-51	0.735626	0.857	0.942	7.96898e-47
CTTN	T_cells	6.15865e-51	-1.04244	0.003	0.428	8.76561e-47
TMEM14C	T_cells	7.68869e-51	-0.745623	0.162	0.758	1.09433e-46
MYLK	T_cells	8.11845e-51	-1.3275	0.003	0.427	1.1555e-46
YWHAE	T_cells	8.84084e-51	-0.914388	0.195	0.815	1.25832e-46
VAMP3	T_cells	1.019e-50	-0.851974	0.043	0.511	1.45035e-46
TIMP1	T_cells	1.11604e-50	-0.945231	0.43	0.926	1.58845e-46
CYSTM1	T_cells	1.38797e-50	-0.853429	0.07	0.566	1.9755e-46
GOLIM4	T_cells	1.48044e-50	-0.964245	0.022	0.466	2.10711e-46
NRP1	T_cells	1.53222e-50	-1.15606	0.008	0.437	2.18081e-46
ARL2	T_cells	1.5964e-50	-0.730935	0.116	0.657	2.27216e-46
FHL2	T_cells	1.84389e-50	-1.28319	0.022	0.465	2.62441e-46
IKBIP	T_cells	2.28364e-50	-0.96714	0.038	0.496	3.2503e-46
NBL1	T_cells	2.49687e-50	-1.21077	0.046	0.507	3.5538e-46
COL1A2	T_cells	2.62569e-50	-1.65267	0.046	0.496	3.73714e-46
ARL1	T_cells	3.43348e-50	-0.771468	0.07	0.563	4.88687e-46
ESD	T_cells	3.92366e-50	-0.728923	0.138	0.703	5.58454e-46
COMT	T_cells	4.30886e-50	-0.811842	0.132	0.687	6.1328e-46
TIMM13	T_cells	4.67475e-50	-0.780388	0.116	0.655	6.65357e-46
AKR1A1	T_cells	5.85115e-50	-0.79462	0.095	0.609	8.32794e-46
LAMTOR2	T_cells	7.73718e-50	-0.763491	0.119	0.658	1.10123e-45
ARPC1A	T_cells	8.1279e-50	-0.972304	0.086	0.589	1.15684e-45
H2AFJ	T_cells	8.29007e-50	-0.77984	0.097	0.614	1.17993e-45
PLSCR1	T_cells	1.29432e-49	-0.82691	0.092	0.603	1.8422e-45
FAM127A	T_cells	2.12854e-49	-0.878397	0.038	0.492	3.02955e-45
NFIC	T_cells	2.62935e-49	-0.866043	0.054	0.523	3.74236e-45
NUCKS1	T_cells	2.90378e-49	-0.741133	0.159	0.74	4.13295e-45
CKAP4	T_cells	3.06781e-49	-1.09901	0.011	0.435	4.36641e-45
PLOD1	T_cells	3.42458e-49	-1.11545	0.008	0.429	4.8742e-45
LIMA1	T_cells	4.57377e-49	-0.842058	0.084	0.582	6.50984e-45
FAM127B	T_cells	5.73084e-49	-0.964933	0.014	0.438	8.1567e-45
MVB12A	T_cells	9.03798e-49	-0.800717	0.038	0.489	1.28638e-44
CHMP4B	T_cells	9.82069e-49	-0.776163	0.073	0.559	1.39778e-44
VGLL4	T_cells	1.11258e-48	-0.821181	0.049	0.51	1.58353e-44
BACE2	T_cells	1.18845e-48	-1.15172	0.005	0.418	1.69151e-44
QSOX1	T_cells	1.27984e-48	-0.813962	0.051	0.513	1.8216e-44
PALLD	T_cells	1.36207e-48	-1.23034	0	0.408	1.93864e-44
TMED3	T_cells	1.37079e-48	-0.772509	0.081	0.575	1.95104e-44
CTGF	T_cells	1.66817e-48	-1.53128	0.027	0.457	2.3743e-44
PHLDA3	T_cells	2.18852e-48	-1.08403	0.008	0.423	3.11492e-44
MXRA8	T_cells	2.53462e-48	-1.42523	0.016	0.439	3.60753e-44
MAP1B	T_cells	3.10948e-48	-1.30349	0.011	0.425	4.42572e-44
MFGE8	T_cells	3.43312e-48	-1.24668	0.095	0.579	4.88635e-44
TJP1	T_cells	3.57505e-48	-1.03052	0.008	0.42	5.08837e-44
NENF	T_cells	3.79287e-48	-0.724026	0.13	0.669	5.39839e-44
ANXA4	T_cells	4.72822e-48	-0.773051	0.065	0.537	6.72967e-44
WWTR1	T_cells	4.82163e-48	-1.05967	0.014	0.431	6.86263e-44
PLAU	T_cells	5.20667e-48	-1.24461	0.108	0.594	7.41066e-44
CDK4	T_cells	5.55977e-48	-0.755669	0.057	0.523	7.91323e-44
TSPAN3	T_cells	5.64014e-48	-0.846812	0.027	0.459	8.02762e-44
CLIC4	T_cells	8.05883e-48	-1.05413	0.008	0.42	1.14701e-43
SERPINH1	T_cells	8.60736e-48	-0.883045	0.17	0.723	1.22508e-43
ARL3	T_cells	9.45713e-48	-0.806043	0.049	0.504	1.34603e-43
RAC2	T_cells	9.88774e-48	1.67174	0.603	0.387	1.40732e-43
EGR1	T_cells	1.08901e-47	-0.914327	0.135	0.662	1.54998e-43
CD276	T_cells	1.3149e-47	-1.01338	0.005	0.413	1.87149e-43
NET1	T_cells	1.32409e-47	-1.07083	0.022	0.446	1.88458e-43
TNFAIP3	T_cells	1.43987e-47	1.85898	0.484	0.205	2.04937e-43
SLC16A3	T_cells	1.78726e-47	-1.14095	0.073	0.547	2.54381e-43
RPL36AL	T_cells	1.88684e-47	0.717027	0.776	0.897	2.68554e-43
COL1A1	T_cells	2.21516e-47	-1.56708	0.062	0.505	3.15284e-43
TPM4	T_cells	2.35799e-47	-0.937044	0.259	0.88	3.35612e-43
GPNMB	T_cells	2.61808e-47	-1.35413	0	0.399	3.72631e-43
BLVRB	T_cells	2.84318e-47	-0.832204	0.046	0.495	4.04669e-43
GNB2	T_cells	3.74358e-47	-0.750233	0.165	0.741	5.32824e-43
LAMP1	T_cells	4.3586e-47	-0.704537	0.17	0.745	6.2036e-43
CAMTA1	T_cells	4.58368e-47	-0.635628	0.119	0.643	6.52395e-43
COA3	T_cells	4.65171e-47	-0.653515	0.076	0.557	6.62078e-43
MMP2	T_cells	4.69598e-47	-1.34365	0.008	0.414	6.68379e-43
NUPR1	T_cells	5.20077e-47	-1.61973	0.014	0.421	7.40226e-43
SERPINA1	T_cells	5.75357e-47	-1.53073	0.027	0.448	8.18905e-43
TPBG	T_cells	6.90002e-47	-0.934967	0.008	0.414	9.82079e-43
GJA1	T_cells	7.30239e-47	-1.14043	0.005	0.406	1.03935e-42
A4GALT	T_cells	8.36035e-47	-1.05342	0.005	0.408	1.18993e-42
PLAUR	T_cells	9.74454e-47	-1.11011	0.086	0.569	1.38694e-42
LAMB1	T_cells	1.22528e-46	-1.04178	0.008	0.412	1.74394e-42
SMIM14	T_cells	1.30769e-46	-0.88025	0.041	0.477	1.86124e-42
ISOC2	T_cells	1.44878e-46	-0.800166	0.049	0.497	2.06205e-42
TAGAP	T_cells	1.63446e-46	1.78019	0.346	0.091	2.32633e-42
BAD	T_cells	1.68729e-46	-0.747379	0.07	0.541	2.40152e-42
NAA20	T_cells	1.75168e-46	-0.668259	0.103	0.607	2.49316e-42
ACADVL	T_cells	1.82711e-46	-0.713955	0.141	0.682	2.60053e-42
SEPT10	T_cells	2.06328e-46	-0.960226	0.003	0.399	2.93666e-42
MLEC	T_cells	2.09665e-46	-0.683812	0.089	0.579	2.98416e-42
YIF1A	T_cells	2.51657e-46	-0.711295	0.084	0.565	3.58184e-42
JAG1	T_cells	2.59272e-46	-1.14258	0.008	0.41	3.69021e-42
TGFB1I1	T_cells	3.0132e-46	-1.12317	0.014	0.419	4.28869e-42
HDAC2	T_cells	3.45676e-46	-0.654058	0.081	0.563	4.92001e-42
AGPAT2	T_cells	3.60808e-46	-0.778617	0.057	0.511	5.13537e-42
MRPL15	T_cells	5.69033e-46	-0.848361	0.019	0.429	8.09905e-42
CSRP2	T_cells	5.83342e-46	-1.12834	0.022	0.435	8.30271e-42
ETS2	T_cells	6.17823e-46	-1.10475	0.046	0.483	8.79348e-42
LHFP	T_cells	6.38863e-46	-1.42059	0.005	0.399	9.09294e-42
ILK	T_cells	7.05744e-46	-0.680773	0.1	0.597	1.00449e-41
ID1	T_cells	7.37509e-46	-1.10354	0.116	0.608	1.0497e-41
CANX	T_cells	7.46519e-46	-0.605115	0.151	0.704	1.06252e-41
FAM3C	T_cells	7.47497e-46	-1.01272	0.095	0.578	1.06391e-41
TFPI	T_cells	8.69306e-46	-1.26481	0.003	0.394	1.23728e-41
IGFBP5	T_cells	9.42146e-46	-1.63786	0.016	0.417	1.34096e-41
DYNC1I2	T_cells	1.17525e-45	-0.608756	0.122	0.64	1.67274e-41
CCL4	T_cells	1.23458e-45	2.17278	0.378	0.113	1.75718e-41
SDC2	T_cells	1.35927e-45	-1.253	0	0.388	1.93465e-41
CRTAP	T_cells	1.46506e-45	-0.769298	0.043	0.478	2.08522e-41
CHID1	T_cells	1.65901e-45	-0.680403	0.051	0.496	2.36127e-41
POLR2I	T_cells	1.92513e-45	-0.71699	0.078	0.55	2.74003e-41
RHOB	T_cells	2.0547e-45	-0.758963	0.151	0.684	2.92446e-41
DAB2	T_cells	2.18034e-45	-1.07077	0.016	0.419	3.10328e-41
PLTP	T_cells	2.22193e-45	-1.07623	0.014	0.415	3.16247e-41
RBP1	T_cells	2.26433e-45	-1.08944	0.03	0.449	3.22283e-41
SEPP1	T_cells	2.42411e-45	-1.47009	0.005	0.395	3.45024e-41
BIN2	T_cells	2.55869e-45	1.70883	0.311	0.073	3.64179e-41
PFDN1	T_cells	2.96602e-45	-0.706642	0.062	0.516	4.22153e-41
PPP2R1A	T_cells	3.09208e-45	-0.671956	0.114	0.624	4.40096e-41
TMEM205	T_cells	3.13882e-45	-0.661356	0.086	0.564	4.46748e-41
TPM2	T_cells	3.898e-45	-1.66704	0.016	0.415	5.54803e-41
SEPT2	T_cells	5.25974e-45	-0.606981	0.162	0.722	7.48619e-41
ZFP36L2	T_cells	5.49583e-45	1.29534	0.714	0.713	7.82222e-41
GINM1	T_cells	6.82607e-45	-0.728055	0.057	0.5	9.71555e-41
PFN2	T_cells	7.02071e-45	-0.999972	0	0.384	9.99258e-41
GOLM1	T_cells	7.40899e-45	-0.975815	0.008	0.399	1.05452e-40
YIPF3	T_cells	7.82265e-45	-0.701406	0.1	0.593	1.1134e-40
TUSC3	T_cells	7.97405e-45	-1.01055	0.008	0.401	1.13495e-40
CNIH4	T_cells	8.57464e-45	-0.70382	0.097	0.586	1.22043e-40
MRPL32	T_cells	8.8836e-45	-0.6351	0.076	0.54	1.2644e-40
NME1	T_cells	1.09668e-44	-0.806014	0.105	0.596	1.5609e-40
C1orf122	T_cells	1.31227e-44	-0.732486	0.065	0.518	1.86776e-40
MGAT1	T_cells	1.36443e-44	-0.610498	0.095	0.575	1.94199e-40
LINC00998	T_cells	1.37525e-44	-0.654096	0.07	0.529	1.9574e-40
COL6A1	T_cells	1.48371e-44	-1.41997	0.014	0.406	2.11176e-40
HEXB	T_cells	1.59451e-44	-0.645388	0.105	0.598	2.26946e-40
DYNC1LI2	T_cells	1.80275e-44	-0.762913	0.032	0.449	2.56585e-40
TXN2	T_cells	1.86741e-44	-0.600901	0.1	0.589	2.65788e-40
SERINC2	T_cells	2.06339e-44	-1.26336	0.019	0.418	2.93683e-40
CCND1	T_cells	2.11e-44	-1.28913	0.016	0.415	3.00316e-40
AKAP12	T_cells	3.76384e-44	-1.21924	0.016	0.412	5.35708e-40
TMA7	T_cells	3.77485e-44	0.612618	0.765	0.887	5.37275e-40
MANBAL	T_cells	4.22081e-44	-0.777231	0.019	0.419	6.00748e-40
MEF2A	T_cells	4.94516e-44	-0.861417	0.024	0.429	7.03844e-40
EPS8	T_cells	5.97678e-44	-1.02835	0.008	0.394	8.50675e-40
HNMT	T_cells	6.15036e-44	-1.01526	0.005	0.389	8.75381e-40
MPZL1	T_cells	6.20369e-44	-0.892066	0.011	0.399	8.82972e-40
SEC61A1	T_cells	6.27425e-44	-0.76232	0.051	0.484	8.93014e-40
C1orf123	T_cells	8.3591e-44	-0.710338	0.038	0.456	1.18975e-39
SLC9A3R2	T_cells	8.55055e-44	-1.25965	0.008	0.392	1.217e-39
NDUFC1	T_cells	8.68395e-44	-0.640871	0.105	0.593	1.23599e-39
MGLL	T_cells	9.30765e-44	-1.09425	0.008	0.392	1.32476e-39
REXO2	T_cells	1.06762e-43	-0.678264	0.132	0.646	1.51954e-39
PHLDA2	T_cells	1.0812e-43	-1.05172	0.046	0.47	1.53887e-39
AIG1	T_cells	1.21313e-43	-0.879806	0.03	0.438	1.72665e-39
FKBP9	T_cells	1.40344e-43	-0.921537	0.005	0.387	1.99751e-39
LAMP2	T_cells	1.41459e-43	-0.630607	0.097	0.576	2.01339e-39
WDR61	T_cells	1.65842e-43	-0.62428	0.054	0.488	2.36043e-39
AK1	T_cells	1.82124e-43	-0.823789	0.03	0.436	2.59217e-39
GPAA1	T_cells	1.91004e-43	-0.720617	0.062	0.501	2.71856e-39
SELM	T_cells	2.12461e-43	-1.02863	0.124	0.605	3.02396e-39
SEPT11	T_cells	2.22762e-43	-0.744679	0.046	0.47	3.17056e-39
TPD52L2	T_cells	2.33076e-43	-0.724273	0.051	0.48	3.31738e-39
DDRGK1	T_cells	2.51986e-43	-0.619086	0.095	0.57	3.58652e-39
INHBA	T_cells	2.57373e-43	-1.29816	0.003	0.379	3.66318e-39
TP53I3	T_cells	2.94043e-43	-0.832388	0.011	0.396	4.18512e-39
YIPF2	T_cells	3.42351e-43	-0.723692	0.038	0.45	4.87268e-39
GPR183	T_cells	3.78576e-43	1.69416	0.419	0.147	5.38827e-39
CLTC	T_cells	4.07534e-43	-0.74248	0.043	0.46	5.80043e-39
HSPG2	T_cells	4.9396e-43	-1.24205	0.019	0.408	7.03053e-39
MCFD2	T_cells	5.31987e-43	-0.775942	0.03	0.433	7.57178e-39
SOD1	T_cells	6.12178e-43	0.861633	0.732	0.853	8.71313e-39
FEZ2	T_cells	7.38042e-43	-0.704093	0.054	0.482	1.05046e-38
SNCG	T_cells	7.49525e-43	-1.17497	0.035	0.439	1.0668e-38
CTNNB1	T_cells	7.57312e-43	-0.634939	0.089	0.551	1.07788e-38
HMG20B	T_cells	7.61815e-43	-0.62309	0.059	0.493	1.08429e-38
CCDC50	T_cells	8.10161e-43	-0.75816	0.054	0.48	1.1531e-38
ITM2A	T_cells	8.24146e-43	1.55788	0.457	0.189	1.17301e-38
DKK3	T_cells	1.14441e-42	-0.999537	0.024	0.42	1.62884e-38
GRINA	T_cells	1.21553e-42	-0.7856	0.038	0.448	1.73007e-38
RHOBTB3	T_cells	1.33958e-42	-0.94464	0	0.368	1.90662e-38
CCDC80	T_cells	1.33958e-42	-1.32492	0	0.368	1.90662e-38
MYL6B	T_cells	1.48653e-42	-0.806277	0.024	0.419	2.11578e-38
TCEAL8	T_cells	1.65534e-42	-0.657646	0.105	0.584	2.35604e-38
NDUFS4	T_cells	1.66109e-42	-0.589835	0.138	0.651	2.36423e-38
C9orf3	T_cells	2.24813e-42	-1.09548	0.003	0.371	3.19977e-38
SLIRP	T_cells	2.93562e-42	-0.636614	0.124	0.623	4.17827e-38
PDLIM5	T_cells	2.93776e-42	-0.795779	0.038	0.446	4.18132e-38
RPS21	T_cells	3.07179e-42	0.605413	0.77	0.919	4.37208e-38
SERPINF1	T_cells	3.23012e-42	-1.63063	0.016	0.395	4.59743e-38
MAP4	T_cells	3.30236e-42	-0.617254	0.076	0.524	4.70025e-38
RAI14	T_cells	3.37874e-42	-0.973231	0.008	0.382	4.80896e-38
TMEM9	T_cells	4.16517e-42	-0.695896	0.032	0.432	5.92828e-38
P4HA2	T_cells	4.18671e-42	-0.88661	0.008	0.382	5.95895e-38
KRT18	T_cells	4.45538e-42	-1.29749	0.051	0.463	6.34134e-38
UROD	T_cells	4.58826e-42	-0.729488	0.046	0.461	6.53047e-38
RARRES3	T_cells	4.96222e-42	1.62167	0.551	0.331	7.06273e-38
SNX7	T_cells	5.04152e-42	-0.912749	0.005	0.376	7.17559e-38
MSRB2	T_cells	5.13914e-42	-0.75755	0.027	0.421	7.31453e-38
CISD1	T_cells	5.9859e-42	-0.683638	0.059	0.488	8.51973e-38
GPX3	T_cells	6.47214e-42	-1.1255	0.005	0.375	9.21179e-38
ITGAV	T_cells	6.5443e-42	-0.775345	0.019	0.404	9.3145e-38
ECHS1	T_cells	7.90315e-42	-0.530015	0.111	0.595	1.12486e-37
SRPX	T_cells	8.71393e-42	-1.21697	0.008	0.38	1.24025e-37
CARHSP1	T_cells	1.0076e-41	-0.638189	0.114	0.595	1.43412e-37
PLIN3	T_cells	1.24572e-41	-0.75473	0.089	0.545	1.77304e-37
FNDC3B	T_cells	1.43086e-41	-0.765325	0.022	0.407	2.03654e-37
MYDGF	T_cells	1.6072e-41	-0.77268	0.186	0.745	2.28753e-37
H1F0	T_cells	1.66465e-41	-0.93015	0.014	0.388	2.3693e-37
CTNND1	T_cells	1.78501e-41	-0.862028	0.008	0.377	2.5406e-37
C10orf10	T_cells	1.99554e-41	-1.24055	0.022	0.402	2.84025e-37
MLF2	T_cells	2.12257e-41	-0.601227	0.127	0.628	3.02106e-37
RTN3	T_cells	2.12628e-41	-0.537502	0.086	0.538	3.02633e-37
MRPL27	T_cells	2.23308e-41	-0.607393	0.092	0.548	3.17834e-37
DPM2	T_cells	2.53281e-41	-0.68149	0.046	0.454	3.60495e-37
EPAS1	T_cells	2.54826e-41	-1.29021	0.019	0.395	3.62694e-37
GLTSCR2	T_cells	2.75637e-41	0.78384	0.762	0.877	3.92314e-37
TXNDC17	T_cells	2.98028e-41	-0.864338	0.149	0.649	4.24183e-37
GPX1	T_cells	3.06767e-41	-0.913172	0.297	0.875	4.36621e-37
RNF130	T_cells	3.32764e-41	-1.08631	0.014	0.387	4.73623e-37
PDIA4	T_cells	4.25171e-41	-0.501853	0.122	0.612	6.05145e-37
EMC10	T_cells	4.54784e-41	-0.553245	0.114	0.596	6.47294e-37
TMEM30A	T_cells	4.5938e-41	-0.704355	0.051	0.466	6.53836e-37
ERI3	T_cells	5.42649e-41	-0.657991	0.03	0.421	7.72353e-37
PSMC3	T_cells	5.4337e-41	-0.561597	0.138	0.643	7.73378e-37
SYNGR2	T_cells	6.47566e-41	-0.765776	0.122	0.598	9.21681e-37
TMEM147	T_cells	6.49171e-41	-0.53786	0.165	0.701	9.23965e-37
NREP	T_cells	6.70317e-41	-0.984645	0.005	0.368	9.54063e-37
GLT8D1	T_cells	6.76878e-41	-0.662724	0.027	0.414	9.634e-37
SVIL	T_cells	7.3814e-41	-0.836668	0.019	0.396	1.05059e-36
SMIM7	T_cells	7.67577e-41	-0.52645	0.105	0.575	1.09249e-36
NAGK	T_cells	7.68864e-41	-0.617196	0.073	0.509	1.09432e-36
SMARCB1	T_cells	7.73746e-41	-0.571756	0.086	0.534	1.10127e-36
FBLN1	T_cells	7.75656e-41	-1.39288	0.022	0.397	1.10399e-36
CETN2	T_cells	8.75769e-41	-0.582815	0.065	0.492	1.24648e-36
CD68	T_cells	1.25399e-40	-1.31053	0.016	0.386	1.78481e-36
EHD2	T_cells	1.42699e-40	-0.933788	0.005	0.366	2.03104e-36
AAMDC	T_cells	1.55375e-40	-0.746946	0.03	0.416	2.21146e-36
ALDH2	T_cells	1.59804e-40	-1.3009	0.008	0.371	2.27449e-36
NAA38	T_cells	1.61268e-40	-0.644105	0.141	0.642	2.29533e-36
TPST1	T_cells	2.23581e-40	-0.914991	0.003	0.359	3.18222e-36
CCDC88A	T_cells	2.26452e-40	-0.853291	0.011	0.376	3.22309e-36
PARVA	T_cells	2.73481e-40	-0.890704	0.003	0.357	3.89246e-36
DAP	T_cells	3.11801e-40	-0.689559	0.051	0.457	4.43787e-36
ADI1	T_cells	3.24817e-40	-0.547649	0.116	0.594	4.62313e-36
PALMD	T_cells	3.55028e-40	-1.23521	0.003	0.356	5.05311e-36
RAB14	T_cells	3.85156e-40	-0.530694	0.092	0.541	5.48192e-36
AAMP	T_cells	3.94412e-40	-0.509175	0.078	0.516	5.61366e-36
TOP1	T_cells	4.86457e-40	-0.522611	0.103	0.564	6.92374e-36
ELOVL1	T_cells	4.91468e-40	-0.654134	0.046	0.445	6.99506e-36
KDELR2	T_cells	4.92461e-40	-0.761951	0.2	0.759	7.0092e-36
LINC01420	T_cells	5.43498e-40	-0.507855	0.151	0.666	7.73561e-36
LAMC1	T_cells	6.44055e-40	-0.892305	0.003	0.355	9.16683e-36
SPTBN1	T_cells	6.65139e-40	-0.781063	0.059	0.47	9.46692e-36
G6PC3	T_cells	7.17144e-40	-0.798321	0.008	0.365	1.02071e-35
LMAN1	T_cells	7.31052e-40	-0.680395	0.119	0.595	1.04051e-35
MRPL40	T_cells	7.49114e-40	-0.610105	0.065	0.485	1.06621e-35
TOMM7	T_cells	7.59517e-40	0.705448	0.749	0.896	1.08102e-35
DNTTIP1	T_cells	7.60167e-40	-0.791621	0.03	0.412	1.08195e-35
GGCT	T_cells	7.89596e-40	-0.649782	0.059	0.473	1.12383e-35
RPN1	T_cells	8.32233e-40	-0.571551	0.07	0.496	1.18452e-35
AP1S1	T_cells	8.59665e-40	-0.647746	0.073	0.502	1.22356e-35
MGST3	T_cells	9.50883e-40	-0.70341	0.243	0.837	1.35339e-35
KDELR3	T_cells	1.02813e-39	-0.992736	0.005	0.36	1.46333e-35
MEF2C	T_cells	1.13514e-39	-1.2926	0.005	0.36	1.61565e-35
GPX8	T_cells	1.28756e-39	-0.901737	0	0.348	1.83259e-35
GRHPR	T_cells	1.3123e-39	-0.505236	0.084	0.523	1.86779e-35
DNASE2	T_cells	1.33507e-39	-0.647201	0.062	0.474	1.90021e-35
DDAH2	T_cells	1.42814e-39	-0.753482	0.068	0.487	2.03267e-35
TRIM47	T_cells	1.56127e-39	-0.847947	0.014	0.376	2.22216e-35
SPG21	T_cells	1.81161e-39	-0.503651	0.111	0.575	2.57847e-35
SPHK1	T_cells	1.81213e-39	-0.945489	0.019	0.387	2.5792e-35
BCKDK	T_cells	2.09568e-39	-0.72502	0.027	0.402	2.98279e-35
TMED9	T_cells	2.17952e-39	-0.730518	0.23	0.816	3.10211e-35
BLVRA	T_cells	2.2798e-39	-0.622448	0.057	0.463	3.24484e-35
WDR13	T_cells	2.39671e-39	-0.563953	0.041	0.432	3.41124e-35
HMGN3	T_cells	2.57605e-39	-0.524515	0.173	0.701	3.6665e-35
RND3	T_cells	2.74287e-39	-1.01794	0.003	0.351	3.90393e-35
PGLS	T_cells	2.8182e-39	-0.561924	0.132	0.619	4.01114e-35
PTPN12	T_cells	2.90245e-39	-0.719871	0.022	0.389	4.13105e-35
LTBP1	T_cells	3.86731e-39	-1.02318	0.003	0.348	5.50434e-35
SRSF7	T_cells	4.13679e-39	1.03289	0.722	0.806	5.8879e-35
SEC13	T_cells	4.83147e-39	-0.590176	0.095	0.542	6.87664e-35
FAM32A	T_cells	4.91509e-39	-0.544255	0.078	0.507	6.99564e-35
TM9SF3	T_cells	5.31949e-39	-0.514795	0.051	0.452	7.57123e-35
IGFBP6	T_cells	6.20312e-39	-1.08796	0.046	0.435	8.8289e-35
LRRC59	T_cells	6.43521e-39	-0.656513	0.062	0.47	9.15924e-35
BNIP3L	T_cells	7.03249e-39	-0.594098	0.084	0.516	1.00093e-34
SLC29A1	T_cells	7.90337e-39	-1.06189	0.003	0.348	1.12489e-34
C5orf15	T_cells	8.97808e-39	-0.601779	0.043	0.433	1.27785e-34
SCOC	T_cells	9.20802e-39	-0.581968	0.046	0.438	1.31058e-34
RORA	T_cells	1.06336e-38	1.77376	0.365	0.127	1.51348e-34
PROCR	T_cells	1.49642e-38	-0.888423	0.008	0.356	2.12986e-34
FXYD5	T_cells	1.55014e-38	0.849536	0.714	0.762	2.20632e-34
TAGLN	T_cells	1.56484e-38	-1.6108	0.076	0.456	2.22724e-34
RNPEP	T_cells	1.64952e-38	-0.601402	0.038	0.42	2.34776e-34
CDKN1A	T_cells	1.83773e-38	-0.694823	0.116	0.568	2.61564e-34
EIF4EBP1	T_cells	1.9228e-38	-0.607134	0.057	0.459	2.73673e-34
TACSTD2	T_cells	2.06674e-38	-1.22985	0.016	0.371	2.94159e-34
GAA	T_cells	2.07331e-38	-0.7872	0.019	0.379	2.95095e-34
MDFI	T_cells	2.13337e-38	-0.830084	0.008	0.355	3.03643e-34
GSTM3	T_cells	2.16327e-38	-0.797657	0.03	0.402	3.07899e-34
KXD1	T_cells	2.21457e-38	-0.516971	0.078	0.503	3.15199e-34
NME4	T_cells	2.51804e-38	-0.726107	0.038	0.418	3.58393e-34
CRK	T_cells	2.55827e-38	-0.687641	0.027	0.396	3.64119e-34
TM2D2	T_cells	2.70775e-38	-0.570323	0.046	0.433	3.85394e-34
CCDC90B	T_cells	3.0707e-38	-0.5012	0.068	0.479	4.37053e-34
PTN	T_cells	3.27065e-38	-1.332	0.022	0.381	4.65512e-34
LGMN	T_cells	3.34102e-38	-1.12837	0.016	0.371	4.75528e-34
EIF6	T_cells	3.62694e-38	-0.643011	0.162	0.673	5.16222e-34
COL12A1	T_cells	3.75155e-38	-1.09555	0.011	0.36	5.33958e-34
PLAT	T_cells	3.83152e-38	-1.18913	0.014	0.363	5.45341e-34
PMEPA1	T_cells	3.89056e-38	-1.18938	0.062	0.452	5.53744e-34
FBN1	T_cells	4.47067e-38	-0.911216	0.008	0.354	6.3631e-34
MTCH2	T_cells	4.88899e-38	-0.509361	0.078	0.5	6.9585e-34
MAGED1	T_cells	5.02813e-38	-0.755257	0.024	0.388	7.15653e-34
MALL	T_cells	5.13381e-38	-0.969922	0.008	0.353	7.30695e-34
FAM210B	T_cells	5.31434e-38	-0.7546	0.035	0.408	7.5639e-34
TSPAN13	T_cells	5.43915e-38	-0.8818	0.022	0.382	7.74155e-34
SPATS2L	T_cells	5.64847e-38	-0.601794	0.124	0.595	8.03947e-34
TMEM45A	T_cells	5.77788e-38	-0.859977	0.005	0.348	8.22365e-34
LAP3	T_cells	5.96246e-38	-0.646463	0.122	0.58	8.48636e-34
PHPT1	T_cells	6.11215e-38	-0.705725	0.189	0.723	8.69942e-34
TMEM208	T_cells	6.27664e-38	-0.532797	0.097	0.536	8.93355e-34
CDC42EP1	T_cells	6.41309e-38	-0.837873	0.008	0.353	9.12776e-34
DEGS1	T_cells	7.45316e-38	-0.540731	0.095	0.53	1.06081e-33
MFSD1	T_cells	8.08438e-38	-0.657293	0.046	0.431	1.15065e-33
NFIB	T_cells	8.24689e-38	-1.12669	0.003	0.339	1.17378e-33
ALCAM	T_cells	8.28299e-38	-0.896266	0.005	0.347	1.17892e-33
VWA1	T_cells	8.8588e-38	-1.02944	0.008	0.351	1.26087e-33
SDC1	T_cells	1.04455e-37	-1.14066	0.03	0.396	1.48671e-33
CLPTM1	T_cells	1.15473e-37	-0.560454	0.054	0.448	1.64352e-33
TM2D1	T_cells	1.34646e-37	-0.553505	0.057	0.45	1.91642e-33
PINK1	T_cells	1.49799e-37	-0.8159	0.003	0.339	2.13208e-33
PLOD3	T_cells	1.5238e-37	-0.636704	0.035	0.408	2.16882e-33
CD109	T_cells	1.54415e-37	-0.977171	0.005	0.343	2.19779e-33
TGFBR2	T_cells	1.57749e-37	-0.76607	0.041	0.417	2.24524e-33
TIMMDC1	T_cells	1.71016e-37	-0.519853	0.084	0.507	2.43408e-33
MRPL36	T_cells	1.81899e-37	-0.504687	0.073	0.483	2.58897e-33
TMEM176B	T_cells	1.87002e-37	-1.64845	0.008	0.347	2.6616e-33
CERCAM	T_cells	1.89271e-37	-0.931835	0.003	0.337	2.69389e-33
COPS7A	T_cells	2.02035e-37	-0.666525	0.032	0.399	2.87557e-33
TBX3	T_cells	2.20942e-37	-0.880509	0	0.332	3.14467e-33
LARP6	T_cells	2.95644e-37	-0.84962	0.005	0.341	4.2079e-33
CRYAB	T_cells	3.22559e-37	-1.1402	0.016	0.364	4.59099e-33
KRT8	T_cells	3.44711e-37	-1.30991	0.038	0.404	4.90627e-33
CTNNBIP1	T_cells	3.82585e-37	-0.650136	0.024	0.382	5.44533e-33
PLXNB2	T_cells	3.83606e-37	-0.704155	0.005	0.342	5.45987e-33
JUP	T_cells	3.86179e-37	-0.885317	0.003	0.336	5.49649e-33
RBPMS	T_cells	3.882e-37	-0.98984	0	0.33	5.52525e-33
SCCPDH	T_cells	4.45647e-37	-0.676428	0.043	0.421	6.34289e-33
COL8A1	T_cells	4.48037e-37	-1.09058	0.005	0.341	6.3769e-33
ADAM9	T_cells	4.59958e-37	-0.741081	0.005	0.341	6.54658e-33
PFKL	T_cells	4.98747e-37	-0.543942	0.059	0.453	7.09866e-33
LAMTOR1	T_cells	5.07248e-37	-0.567731	0.2	0.744	7.21966e-33
TM9SF2	T_cells	5.31717e-37	-0.501229	0.092	0.52	7.56793e-33
TUBA1C	T_cells	5.67861e-37	-0.731756	0.127	0.585	8.08237e-33
MYO1C	T_cells	5.85619e-37	-0.698752	0.014	0.358	8.33511e-33
COL6A2	T_cells	5.91695e-37	-1.58918	0.014	0.353	8.42159e-33
CYFIP1	T_cells	6.26778e-37	-0.715017	0.011	0.352	8.92093e-33
ITGB5	T_cells	6.69144e-37	-0.780566	0.005	0.34	9.52393e-33
FUCA1	T_cells	7.11582e-37	-0.676601	0.03	0.391	1.01279e-32
PSME1	T_cells	7.27669e-37	0.802055	0.722	0.839	1.03569e-32
FAM129B	T_cells	7.9002e-37	-0.778562	0.008	0.345	1.12444e-32
EEF1B2	T_cells	8.03237e-37	0.549538	0.776	0.933	1.14325e-32
COQ4	T_cells	8.29659e-37	-0.545723	0.041	0.413	1.18085e-32
AHCYL1	T_cells	8.53477e-37	-0.646575	0.032	0.395	1.21475e-32
VPS25	T_cells	8.93236e-37	-0.555262	0.07	0.472	1.27134e-32
RALB	T_cells	9.21727e-37	-0.685028	0.051	0.432	1.31189e-32
DAPK3	T_cells	1.00705e-36	-0.600607	0.019	0.368	1.43333e-32
UBE2E1	T_cells	1.28353e-36	-0.557995	0.057	0.444	1.82684e-32
COMMD4	T_cells	1.43718e-36	-0.559004	0.081	0.491	2.04554e-32
GBAS	T_cells	1.64976e-36	-0.555828	0.041	0.409	2.34811e-32
YIF1B	T_cells	1.6882e-36	-0.624243	0.032	0.392	2.40282e-32
MKKS	T_cells	1.86475e-36	-0.545991	0.084	0.497	2.6541e-32
SLC39A7	T_cells	1.95616e-36	-0.541232	0.049	0.425	2.78421e-32
EEA1	T_cells	2.44058e-36	-0.547164	0.054	0.436	3.47368e-32
IFNAR1	T_cells	2.62367e-36	-0.664456	0.035	0.396	3.73426e-32
ACTN4	T_cells	3.04456e-36	-0.625274	0.146	0.62	4.33332e-32
CYB5R1	T_cells	3.19297e-36	-0.714253	0.022	0.37	4.54455e-32
GANAB	T_cells	3.25906e-36	-0.610132	0.035	0.398	4.63863e-32
SLC44A1	T_cells	3.2647e-36	-0.668301	0.022	0.37	4.64665e-32
NCKAP1	T_cells	3.2961e-36	-0.754305	0.005	0.334	4.69133e-32
NAPRT	T_cells	3.86498e-36	-0.652803	0.03	0.386	5.50103e-32
C20orf27	T_cells	4.17304e-36	-0.620912	0.032	0.391	5.93949e-32
TFG	T_cells	4.27298e-36	-0.502899	0.127	0.584	6.08173e-32
GIPC1	T_cells	4.44987e-36	-0.549005	0.049	0.425	6.3335e-32
SMIM3	T_cells	4.9121e-36	-0.741826	0.032	0.391	6.9914e-32
STMN1	T_cells	5.09723e-36	-0.733737	0.097	0.518	7.25489e-32
GSTO1	T_cells	5.13667e-36	-0.702455	0.227	0.778	7.31103e-32
GNB4	T_cells	5.23053e-36	-0.827986	0.003	0.328	7.44461e-32
MRC2	T_cells	5.26294e-36	-0.868752	0.003	0.328	7.49074e-32
GNG12	T_cells	6.28473e-36	-0.803634	0.003	0.327	8.94506e-32
IFNGR1	T_cells	6.38288e-36	-0.525992	0.103	0.531	9.08476e-32
LINC01116	T_cells	6.95798e-36	-0.73283	0.011	0.344	9.90329e-32
TMEM54	T_cells	7.03703e-36	-0.822433	0.005	0.332	1.00158e-31
MRPL24	T_cells	7.97332e-36	-0.518615	0.062	0.451	1.13484e-31
RBFOX2	T_cells	8.49927e-36	-0.660785	0.011	0.344	1.2097e-31
UBE2E3	T_cells	8.83502e-36	-0.538882	0.114	0.557	1.25749e-31
PLOD2	T_cells	9.07531e-36	-0.800698	0.005	0.332	1.29169e-31
ENAH	T_cells	9.13883e-36	-0.860093	0.003	0.326	1.30073e-31
NQO2	T_cells	1.01621e-35	-0.514219	0.057	0.439	1.44637e-31
SPATS2	T_cells	1.12574e-35	-0.688508	0.014	0.348	1.60227e-31
HOXB7	T_cells	1.17054e-35	-0.771048	0.014	0.348	1.66604e-31
SWAP70	T_cells	1.17864e-35	-0.874028	0.022	0.364	1.67756e-31
UBXN6	T_cells	1.24784e-35	-0.614701	0.038	0.398	1.77605e-31
KANK2	T_cells	1.32831e-35	-0.840774	0	0.319	1.89058e-31
CREM	T_cells	1.42043e-35	1.64695	0.573	0.413	2.0217e-31
ADM	T_cells	1.43001e-35	-1.04721	0.016	0.352	2.03534e-31
LPP	T_cells	1.70128e-35	-0.50697	0.089	0.501	2.42143e-31
GLT8D2	T_cells	1.79188e-35	-0.880099	0.005	0.329	2.55038e-31
YWHAH	T_cells	1.86204e-35	-0.598524	0.189	0.689	2.65024e-31
EPN1	T_cells	1.99456e-35	-0.58039	0.035	0.391	2.83885e-31
DYNLT1	T_cells	2.12003e-35	-0.567525	0.178	0.69	3.01744e-31
RTN4	T_cells	2.13219e-35	-0.733964	0.265	0.861	3.03475e-31
CEBPD	T_cells	2.33391e-35	-0.764542	0.124	0.555	3.32186e-31
GCSH	T_cells	2.40553e-35	-0.595644	0.024	0.369	3.4238e-31
RAMP1	T_cells	2.46371e-35	-0.953716	0.005	0.328	3.5066e-31
BLCAP	T_cells	2.6023e-35	-0.558951	0.054	0.43	3.70386e-31
FERMT2	T_cells	2.77206e-35	-0.963915	0	0.317	3.94548e-31
HEBP2	T_cells	2.86701e-35	-0.59703	0.062	0.448	4.08061e-31
C1orf54	T_cells	2.94253e-35	-1.20295	0.005	0.328	4.18811e-31
AGTRAP	T_cells	2.97907e-35	-0.515686	0.089	0.503	4.24011e-31
CAMK2N1	T_cells	3.06414e-35	-0.846877	0.022	0.362	4.36119e-31
C4orf48	T_cells	3.30839e-35	-0.534494	0.119	0.562	4.70884e-31
PTK2	T_cells	3.33035e-35	-0.918504	0	0.316	4.74009e-31
SHC1	T_cells	3.39934e-35	-0.696536	0.024	0.367	4.83828e-31
SLC14A1	T_cells	3.51687e-35	-1.29327	0.024	0.365	5.00556e-31
CREB3	T_cells	4.34151e-35	-0.502572	0.057	0.435	6.17927e-31
DCBLD2	T_cells	4.46922e-35	-1.19964	0.014	0.341	6.36104e-31
ABHD12	T_cells	4.65012e-35	-0.634189	0.032	0.382	6.61852e-31
OGFOD3	T_cells	4.69032e-35	-0.611698	0.019	0.355	6.67574e-31
PSMD1	T_cells	4.98888e-35	-0.511476	0.068	0.456	7.10068e-31
BCAR1	T_cells	5.07003e-35	-0.829211	0.005	0.325	7.21618e-31
GPRC5C	T_cells	5.4294e-35	-0.886891	0.005	0.326	7.72767e-31
THBS1	T_cells	5.89411e-35	-0.878945	0.014	0.343	8.38909e-31
NEK6	T_cells	6.40722e-35	-0.666439	0.011	0.337	9.11939e-31
ARHGAP29	T_cells	7.37475e-35	-1.24659	0.005	0.324	1.04965e-30
DTYMK	T_cells	7.51665e-35	-0.675124	0.032	0.38	1.06985e-30
CDC42BPA	T_cells	7.57813e-35	-0.80849	0.003	0.318	1.0786e-30
TCEAL3	T_cells	7.62132e-35	-0.545377	0.038	0.392	1.08474e-30
MPDU1	T_cells	8.16366e-35	-0.506849	0.065	0.446	1.16193e-30
LRP1	T_cells	8.29395e-35	-0.785602	0.003	0.319	1.18048e-30
HRAS	T_cells	1.03095e-34	-0.762343	0.049	0.415	1.46734e-30
GLMP	T_cells	1.0553e-34	-0.674053	0.014	0.341	1.50201e-30
CBR1	T_cells	1.11667e-34	-0.531364	0.078	0.474	1.58935e-30
KLHDC3	T_cells	1.16127e-34	-0.535827	0.038	0.392	1.65284e-30
ABL2	T_cells	1.35223e-34	-0.803275	0.016	0.346	1.92463e-30
RP11-382A20.3	T_cells	1.37594e-34	-0.740159	0.005	0.323	1.95837e-30
DUSP6	T_cells	1.52646e-34	-0.916929	0.076	0.463	2.17261e-30
TCEAL1	T_cells	1.69465e-34	-0.736542	0.014	0.34	2.412e-30
TMEM98	T_cells	1.82215e-34	-0.825174	0.011	0.334	2.59347e-30
ALG3	T_cells	1.98513e-34	-0.553234	0.049	0.412	2.82544e-30
FAP	T_cells	2.00434e-34	-0.959162	0.005	0.322	2.85278e-30
SIL1	T_cells	2.04199e-34	-0.579032	0.019	0.351	2.90637e-30
SLC31A2	T_cells	2.048e-34	-0.687587	0.019	0.351	2.91492e-30
GPC1	T_cells	2.46968e-34	-0.775407	0.003	0.316	3.51509e-30
NT5C3B	T_cells	2.49639e-34	-0.703348	0.014	0.338	3.55311e-30
QKI	T_cells	2.59911e-34	-0.627909	0.016	0.344	3.69932e-30
MAFB	T_cells	2.64303e-34	-1.24557	0.011	0.331	3.76183e-30
MPZL2	T_cells	2.89861e-34	-0.93921	0.003	0.315	4.12558e-30
RRAS	T_cells	3.17173e-34	-0.687692	0.014	0.338	4.51432e-30
TMEM115	T_cells	4.11474e-34	-0.552943	0.022	0.354	5.85651e-30
FAM198B	T_cells	4.23208e-34	-0.827751	0.008	0.324	6.02352e-30
SGCB	T_cells	4.45041e-34	-0.683079	0.014	0.337	6.33427e-30
EDNRA	T_cells	5.07605e-34	-0.808854	0.003	0.313	7.22474e-30
UBTD1	T_cells	5.11469e-34	-0.710716	0	0.307	7.27974e-30
RPS4Y1	T_cells	5.35067e-34	0.569155	0.743	0.898	7.61561e-30
LUM	T_cells	5.42987e-34	-1.41529	0.057	0.401	7.72834e-30
CORO1C	T_cells	5.56512e-34	-0.689958	0.022	0.351	7.92083e-30
ANXA5	T_cells	5.98957e-34	-0.634285	0.265	0.824	8.52496e-30
C1S	T_cells	6.17648e-34	-1.58471	0.014	0.33	8.79098e-30
PTK7	T_cells	7.34059e-34	-0.776618	0	0.306	1.04479e-29
OSBPL1A	T_cells	7.34059e-34	-0.777402	0	0.306	1.04479e-29
CFI	T_cells	7.49224e-34	-1.16734	0.003	0.31	1.06637e-29
CLDN4	T_cells	8.11196e-34	-1.23794	0.011	0.328	1.15458e-29
SLC39A13	T_cells	8.1344e-34	-0.639972	0.014	0.335	1.15777e-29
PLEC	T_cells	8.16024e-34	-0.565412	0.076	0.461	1.16145e-29
DPYSL2	T_cells	8.20942e-34	-0.851791	0.005	0.317	1.16845e-29
RIN2	T_cells	8.68137e-34	-0.727513	0.005	0.317	1.23562e-29
RHOC	T_cells	1.16942e-33	-0.705592	0.262	0.819	1.66443e-29
BMPR2	T_cells	1.20395e-33	-0.685605	0.027	0.361	1.71358e-29
ABHD2	T_cells	1.30255e-33	-0.676528	0.03	0.365	1.85391e-29
DHRSX	T_cells	1.31852e-33	-0.577545	0.016	0.339	1.87666e-29
COL6A3	T_cells	1.38872e-33	-1.1996	0.003	0.31	1.97657e-29
ATP2A2	T_cells	1.70124e-33	-0.525069	0.041	0.389	2.42137e-29
SLC35B2	T_cells	1.71342e-33	-0.517212	0.043	0.395	2.43872e-29
CTSD	T_cells	1.73106e-33	-0.702638	0.251	0.778	2.46382e-29
RGS12	T_cells	1.79247e-33	-0.673582	0.005	0.315	2.55122e-29
SNAI2	T_cells	2.00035e-33	-0.762465	0.008	0.32	2.8471e-29
CRLS1	T_cells	2.04663e-33	-0.532329	0.049	0.404	2.91297e-29
BGN	T_cells	2.15474e-33	-1.61045	0.024	0.341	3.06685e-29
SIRPA	T_cells	2.56447e-33	-0.793847	0.003	0.308	3.65e-29
TNFRSF12A	T_cells	2.56966e-33	-0.912307	0.108	0.504	3.6574e-29
PTPRK	T_cells	2.95561e-33	-0.689881	0.008	0.319	4.20672e-29
AIDA	T_cells	3.222e-33	-0.540176	0.041	0.387	4.58587e-29
HCFC1R1	T_cells	3.25479e-33	-0.565827	0.078	0.462	4.63255e-29
CRELD1	T_cells	3.29976e-33	-0.586819	0.027	0.357	4.69655e-29
CTDNEP1	T_cells	3.32344e-33	-0.543253	0.027	0.357	4.73026e-29
NFE2L1	T_cells	3.60807e-33	-0.610547	0.019	0.341	5.13536e-29
ST5	T_cells	4.42448e-33	-0.681887	0	0.3	6.29736e-29
KCTD12	T_cells	4.42448e-33	-0.974562	0	0.3	6.29736e-29
PABPC1	T_cells	4.73168e-33	0.623784	0.749	0.908	6.73461e-29
FKBP1A	T_cells	5.01902e-33	-0.809783	0.343	0.894	7.14357e-29
THY1	T_cells	5.02638e-33	-1.29676	0.019	0.336	7.15404e-29
LXN	T_cells	5.20741e-33	-0.772401	0.03	0.361	7.41171e-29
WARS	T_cells	5.59815e-33	-0.768977	0.027	0.355	7.96785e-29
COL5A2	T_cells	5.99735e-33	-0.998227	0.005	0.311	8.53602e-29
HAPLN3	T_cells	6.24653e-33	-0.5777	0.073	0.45	8.89068e-29
WDR18	T_cells	6.71475e-33	-0.514218	0.024	0.351	9.5571e-29
TMEM11	T_cells	7.0304e-33	-0.548482	0.032	0.367	1.00064e-28
PLEK2	T_cells	7.16499e-33	-0.926879	0.008	0.316	1.01979e-28
WDR34	T_cells	7.25408e-33	-0.646846	0.019	0.339	1.03247e-28
HM13	T_cells	7.26567e-33	-0.513663	0.154	0.62	1.03412e-28
TPD52L1	T_cells	7.56907e-33	-0.78947	0.003	0.304	1.07731e-28
GAS2L1	T_cells	8.73908e-33	-0.659444	0.011	0.32	1.24383e-28
SAE1	T_cells	8.75547e-33	-0.517089	0.054	0.41	1.24617e-28
SNX1	T_cells	9.79753e-33	-0.582529	0.03	0.359	1.39448e-28
HBEGF	T_cells	1.01488e-32	-0.956722	0.019	0.336	1.44448e-28
BMP1	T_cells	1.02564e-32	-0.749085	0.005	0.309	1.45979e-28
PDGFC	T_cells	1.07121e-32	-0.720603	0.005	0.309	1.52465e-28
UBA1	T_cells	1.26398e-32	-0.520228	0.043	0.388	1.79902e-28
LAMB3	T_cells	1.27987e-32	-1.06632	0.003	0.303	1.82164e-28
BHLHE41	T_cells	1.28949e-32	-0.741394	0	0.297	1.83534e-28
RHOD	T_cells	1.4339e-32	-0.715713	0.022	0.343	2.04088e-28
BAIAP2	T_cells	1.46756e-32	-0.693371	0.008	0.314	2.08878e-28
LTBP4	T_cells	1.50241e-32	-0.635359	0.027	0.352	2.13838e-28
LOXL2	T_cells	1.53351e-32	-0.790846	0.003	0.302	2.18264e-28
MYO6	T_cells	1.60275e-32	-0.556269	0.032	0.365	2.28119e-28
STX7	T_cells	1.78084e-32	-0.627346	0.03	0.357	2.53466e-28
KNOP1	T_cells	1.83756e-32	-0.67918	0.014	0.323	2.61541e-28
SPINT2	T_cells	1.85702e-32	-0.9592	0.097	0.485	2.64309e-28
SERPINE2	T_cells	2.01249e-32	-1.0668	0.043	0.378	2.86437e-28
DCTPP1	T_cells	2.22316e-32	-0.543085	0.049	0.396	3.16422e-28
PGM1	T_cells	2.30825e-32	-0.514739	0.027	0.352	3.28534e-28
AC013461.1	T_cells	2.66009e-32	-0.668195	0.016	0.329	3.7861e-28
SPINT1	T_cells	2.93347e-32	-0.752996	0.022	0.34	4.17521e-28
KCNJ15	T_cells	3.07651e-32	-0.814582	0.005	0.306	4.3788e-28
SULF2	T_cells	3.23762e-32	-0.584593	0.049	0.394	4.6081e-28
LIMD2	T_cells	3.87931e-32	1.68728	0.432	0.219	5.52142e-28
ACTA2	T_cells	3.98653e-32	-1.34088	0.076	0.415	5.67403e-28
TWF1	T_cells	4.10314e-32	-0.609888	0.038	0.371	5.83999e-28
MAGEF1	T_cells	4.30941e-32	-0.577466	0.019	0.333	6.13358e-28
VCL	T_cells	4.56115e-32	-0.641491	0.016	0.327	6.49189e-28
CHPF	T_cells	4.63179e-32	-0.632793	0.03	0.354	6.59242e-28
HSPD1	T_cells	4.68745e-32	0.967742	0.7	0.805	6.67165e-28
TSPAN9	T_cells	6.06185e-32	-0.67209	0.008	0.309	8.62783e-28
ITGA2	T_cells	6.1154e-32	-0.892146	0.014	0.319	8.70405e-28
VAT1	T_cells	6.35516e-32	-0.731601	0.011	0.313	9.0453e-28
ERGIC1	T_cells	6.60286e-32	-0.615694	0.014	0.32	9.39784e-28
CXXC5	T_cells	6.93867e-32	-0.721867	0.008	0.308	9.87581e-28
ANXA2	T_cells	7.15596e-32	-0.753323	0.443	0.924	1.01851e-27
KRT19	T_cells	7.37391e-32	-1.10716	0.116	0.477	1.04953e-27
SLA	T_cells	7.77773e-32	1.57	0.273	0.079	1.107e-27
ST3GAL4	T_cells	7.96391e-32	-0.608173	0.019	0.33	1.1335e-27
MSRA	T_cells	8.38802e-32	-0.557467	0.027	0.348	1.19387e-27
DSP	T_cells	9.04428e-32	-0.836398	0.003	0.296	1.28727e-27
CSTA	T_cells	9.06818e-32	-0.797936	0.014	0.319	1.29067e-27
UNC93B1	T_cells	9.75965e-32	-0.666026	0.011	0.313	1.38909e-27
NT5E	T_cells	9.87416e-32	-1.05947	0.027	0.347	1.40539e-27
LRRC41	T_cells	9.88576e-32	-0.515872	0.022	0.336	1.40704e-27
EFEMP1	T_cells	1.00819e-31	-0.839447	0.014	0.318	1.43496e-27
SPOCK1	T_cells	1.07196e-31	-0.832894	0.003	0.296	1.52571e-27
CBY1	T_cells	1.12496e-31	-0.617118	0.014	0.317	1.60115e-27
LTBP3	T_cells	1.49171e-31	-0.552326	0.038	0.368	2.12315e-27
NT5DC2	T_cells	1.50852e-31	-0.687714	0.005	0.3	2.14708e-27
MYO10	T_cells	1.52833e-31	-0.719382	0	0.289	2.17528e-27
GPX7	T_cells	1.54494e-31	-0.570244	0.027	0.344	2.19891e-27
ELK3	T_cells	1.55919e-31	-0.524816	0.057	0.406	2.2192e-27
STRA6	T_cells	1.82905e-31	-0.778796	0.003	0.294	2.60329e-27
COL18A1	T_cells	1.89174e-31	-1.10361	0.014	0.314	2.69251e-27
ITGA6	T_cells	1.90671e-31	-0.818309	0.051	0.393	2.71382e-27
C8orf4	T_cells	2.09961e-31	-1.19314	0.022	0.329	2.98837e-27
SSPN	T_cells	2.10774e-31	-0.797768	0.005	0.299	2.99994e-27
SH3GL1	T_cells	2.11732e-31	-0.527083	0.027	0.345	3.01358e-27
ARHGEF12	T_cells	2.40999e-31	-0.58775	0.024	0.337	3.43013e-27
NFIA	T_cells	2.41727e-31	-0.754131	0.011	0.31	3.4405e-27
FILIP1L	T_cells	2.45301e-31	-1.16069	0.003	0.293	3.49137e-27
CAPS	T_cells	2.50277e-31	-1.03401	0.024	0.338	3.56219e-27
TMEM176A	T_cells	2.61574e-31	-1.33306	0.003	0.292	3.72298e-27
SCG5	T_cells	3.05433e-31	-0.898973	0.005	0.298	4.34722e-27
NR2F2	T_cells	3.25414e-31	-1.00399	0.008	0.301	4.63162e-27
CKS1B	T_cells	3.28996e-31	-0.620926	0.057	0.402	4.6826e-27
ITGB4	T_cells	3.54814e-31	-0.886552	0.027	0.34	5.05007e-27
MBOAT7	T_cells	3.8416e-31	-0.560057	0.043	0.375	5.46776e-27
CUX1	T_cells	4.1205e-31	-0.581751	0.011	0.309	5.8647e-27
UBE2E2	T_cells	4.36614e-31	-0.761648	0	0.285	6.21433e-27
H2AFY	T_cells	5.59595e-31	-0.638262	0.214	0.714	7.96472e-27
FN1	T_cells	6.17979e-31	-0.779153	0.357	0.792	8.7957e-27
PLBD1	T_cells	6.18897e-31	-0.800576	0.003	0.29	8.80876e-27
DPYSL3	T_cells	6.19821e-31	-0.702164	0.003	0.29	8.82191e-27
SCYL1	T_cells	6.34262e-31	-0.571486	0.027	0.34	9.02745e-27
LOXL1	T_cells	6.64969e-31	-0.819657	0.008	0.301	9.46451e-27
BOD1	T_cells	6.95803e-31	-0.5187	0.022	0.33	9.90336e-27
CEP170	T_cells	9.9108e-31	-0.567756	0.019	0.323	1.4106e-26
NUDT3	T_cells	9.91122e-31	-0.558793	0.043	0.371	1.41066e-26
MORN2	T_cells	1.07326e-30	-0.542976	0.016	0.317	1.52756e-26
GNAQ	T_cells	1.09755e-30	-0.591879	0.035	0.355	1.56214e-26
AGRN	T_cells	1.21447e-30	-0.68139	0.008	0.299	1.72856e-26
MAST4	T_cells	1.23375e-30	-0.565997	0.043	0.371	1.75599e-26
SERTAD4-AS1	T_cells	1.23886e-30	-0.762434	0.003	0.287	1.76328e-26
EVA1A	T_cells	1.24441e-30	-0.74391	0.003	0.287	1.77117e-26
EVI5	T_cells	1.36705e-30	-0.616702	0.011	0.304	1.94572e-26
MLPH	T_cells	1.37103e-30	-0.777492	0.011	0.304	1.95139e-26
ILVBL	T_cells	1.43316e-30	-0.525843	0.024	0.333	2.03982e-26
EPB41L2	T_cells	1.44087e-30	-0.741623	0.005	0.293	2.05079e-26
MAP4K4	T_cells	1.53269e-30	-0.52543	0.032	0.35	2.18148e-26
ACP2	T_cells	1.61185e-30	-0.572067	0.014	0.31	2.29415e-26
BCAM	T_cells	1.88997e-30	-1.42985	0.003	0.284	2.68999e-26
EVI2B	T_cells	1.8984e-30	1.51951	0.378	0.164	2.70199e-26
MXRA7	T_cells	1.98983e-30	-0.535116	0.022	0.326	2.83212e-26
TSPAN6	T_cells	2.01815e-30	-0.667781	0.005	0.29	2.87243e-26
NINJ1	T_cells	2.08898e-30	-0.531867	0.076	0.434	2.97325e-26
SFN	T_cells	2.17417e-30	-1.15963	0.03	0.34	3.0945e-26
LGALS3	T_cells	2.23525e-30	-0.664245	0.286	0.836	3.18143e-26
SMUG1	T_cells	2.34682e-30	-0.501793	0.027	0.337	3.34023e-26
PAWR	T_cells	2.42887e-30	-0.609696	0.008	0.297	3.45701e-26
PLXDC2	T_cells	2.47852e-30	-0.830687	0	0.279	3.52768e-26
ITGA3	T_cells	2.68491e-30	-0.98455	0.027	0.336	3.82144e-26
SMTN	T_cells	3.26634e-30	-0.671221	0.011	0.301	4.64898e-26
PNRC1	T_cells	3.38814e-30	0.969801	0.686	0.738	4.82234e-26
CPQ	T_cells	3.88954e-30	-0.608096	0.035	0.351	5.53599e-26
LRRC8A	T_cells	4.06585e-30	-0.600968	0.008	0.295	5.78692e-26
TSC22D3	T_cells	4.13141e-30	1.29253	0.641	0.609	5.88023e-26
FBLIM1	T_cells	4.13952e-30	-0.793149	0.003	0.283	5.89177e-26
ANTXR1	T_cells	4.15949e-30	-0.770839	0	0.277	5.9202e-26
PPP1R13L	T_cells	5.13462e-30	-0.642682	0.008	0.293	7.30811e-26
PLPP1	T_cells	5.33815e-30	-0.758779	0.038	0.354	7.59778e-26
BDH2	T_cells	5.93432e-30	-0.501295	0.043	0.367	8.44632e-26
GMFG	T_cells	6.08754e-30	1.24487	0.592	0.496	8.6644e-26
SERPINE1	T_cells	7.61077e-30	-0.913921	0.024	0.326	1.08324e-25
WLS	T_cells	7.78982e-30	-0.698591	0.005	0.286	1.10873e-25
ECE1	T_cells	7.93255e-30	-0.565484	0.043	0.364	1.12904e-25
SH3PXD2A	T_cells	8.26008e-30	-0.621573	0.014	0.303	1.17566e-25
HYI	T_cells	8.64677e-30	-0.588399	0.014	0.304	1.23069e-25
FLNB	T_cells	8.66677e-30	-0.579116	0.019	0.314	1.23354e-25
NPDC1	T_cells	8.75507e-30	-1.12859	0.043	0.354	1.24611e-25
TNFSF10	T_cells	8.98628e-30	-0.529519	0.181	0.633	1.27902e-25
LAMA4	T_cells	1.09296e-29	-0.841414	0.008	0.29	1.55561e-25
SMIM4	T_cells	1.15852e-29	-0.501357	0.032	0.343	1.64893e-25
CDCP1	T_cells	1.16665e-29	-0.654007	0.005	0.286	1.66049e-25
CHP1	T_cells	1.26073e-29	-0.51291	0.041	0.358	1.7944e-25
SSFA2	T_cells	1.39688e-29	-0.564493	0.016	0.308	1.98818e-25
ANGPTL4	T_cells	1.45694e-29	-1.02034	0.011	0.295	2.07367e-25
TCEA2	T_cells	1.64429e-29	-0.523269	0.024	0.323	2.34032e-25
HOMER3	T_cells	1.6454e-29	-0.609279	0.003	0.279	2.34189e-25
CAPG	T_cells	1.90716e-29	-0.6825	0.165	0.578	2.71446e-25
FKBP7	T_cells	2.02494e-29	-0.717386	0.008	0.289	2.8821e-25
C19orf33	T_cells	2.09816e-29	-0.915346	0.019	0.312	2.98631e-25
LPCAT2	T_cells	2.19787e-29	-0.680004	0.005	0.283	3.12822e-25
G0S2	T_cells	2.57061e-29	-1.09966	0.014	0.298	3.65875e-25
SPECC1	T_cells	2.58064e-29	-0.536411	0.011	0.294	3.67303e-25
COL7A1	T_cells	2.67332e-29	-0.943629	0.019	0.311	3.80493e-25
SPG20	T_cells	2.9015e-29	-0.51394	0.032	0.339	4.1297e-25
RAC1	T_cells	2.90354e-29	-0.750739	0.349	0.923	4.13261e-25
KRT5	T_cells	3.0096e-29	-1.12259	0.022	0.316	4.28356e-25
TSPAN7	T_cells	3.13373e-29	-1.12144	0.008	0.286	4.46024e-25
TRIOBP	T_cells	3.13407e-29	-0.612477	0.011	0.293	4.46072e-25
AKR1C3	T_cells	3.23588e-29	-0.643995	0.03	0.331	4.60562e-25
DCBLD1	T_cells	3.32125e-29	-0.608203	0.016	0.305	4.72713e-25
PXN	T_cells	3.35434e-29	-0.572678	0.016	0.305	4.77423e-25
RNASE1	T_cells	3.55939e-29	-1.53404	0.027	0.318	5.06607e-25
DPCD	T_cells	3.6293e-29	-0.509303	0.011	0.293	5.16559e-25
GNS	T_cells	4.45616e-29	-0.677378	0.014	0.298	6.34245e-25
NUAK1	T_cells	5.1719e-29	-0.700541	0.005	0.28	7.36117e-25
NDRG2	T_cells	5.37363e-29	-1.0164	0.003	0.274	7.64828e-25
UCHL3	T_cells	5.39379e-29	-0.51532	0.078	0.43	7.67699e-25
AHNAK2	T_cells	5.4213e-29	-0.712066	0.003	0.274	7.71614e-25
CXCL14	T_cells	5.68066e-29	-1.16685	0.019	0.306	8.08529e-25
DDX52	T_cells	5.87436e-29	-0.529496	0.022	0.314	8.36098e-25
ZNF503	T_cells	6.20732e-29	-0.809025	0.005	0.28	8.83488e-25
EIF2AK4	T_cells	6.76226e-29	-0.508207	0.035	0.34	9.62473e-25
STK4	T_cells	6.88408e-29	1.67974	0.484	0.308	9.79811e-25
F11R	T_cells	7.28077e-29	-0.610968	0.008	0.285	1.03627e-24
CRNDE	T_cells	8.62679e-29	-0.62851	0.008	0.284	1.22785e-24
CYB5A	T_cells	8.80774e-29	-0.67023	0.084	0.432	1.25361e-24
DHRS2	T_cells	8.81943e-29	-1.00731	0.008	0.284	1.25527e-24
HMGB3	T_cells	8.85681e-29	-0.618009	0.005	0.279	1.26059e-24
CTBP2	T_cells	1.01514e-28	-0.722887	0.005	0.277	1.44484e-24
ZFHX3	T_cells	1.0362e-28	-0.714717	0.003	0.272	1.47482e-24
TNKS1BP1	T_cells	1.06764e-28	-0.642625	0	0.266	1.51957e-24
PSD3	T_cells	1.26839e-28	-0.545905	0.005	0.277	1.8053e-24
CTSA	T_cells	1.31409e-28	-0.566399	0.214	0.694	1.87034e-24
EVA1B	T_cells	1.34561e-28	-0.583796	0.014	0.293	1.9152e-24
ADAM15	T_cells	1.37968e-28	-0.847192	0.016	0.298	1.96371e-24
SLPI	T_cells	1.39088e-28	-0.939194	0.008	0.283	1.97964e-24
LMCD1	T_cells	1.4062e-28	-0.888627	0.03	0.324	2.00144e-24
FKBP10	T_cells	1.569e-28	-1.01942	0.011	0.286	2.23315e-24
MSRB3	T_cells	1.77283e-28	-0.867438	0	0.265	2.52326e-24
DFFA	T_cells	2.04017e-28	-0.530101	0.019	0.303	2.90377e-24
FEZ1	T_cells	2.04351e-28	-0.570949	0.016	0.297	2.90853e-24
MYOF	T_cells	2.09866e-28	-0.660442	0	0.264	2.98702e-24
TNC	T_cells	2.1074e-28	-0.85699	0.003	0.27	2.99946e-24
TCF12	T_cells	2.19541e-28	-0.586655	0.014	0.293	3.12472e-24
ALDH7A1	T_cells	2.48355e-28	-0.624572	0.003	0.269	3.53484e-24
ASAP2	T_cells	2.48399e-28	-0.632301	0	0.263	3.53546e-24
SGCE	T_cells	2.48399e-28	-0.689975	0	0.263	3.53546e-24
HMGA2	T_cells	2.48399e-28	-0.987671	0	0.263	3.53546e-24
GJB2	T_cells	2.78825e-28	-0.902115	0.014	0.291	3.96852e-24
IGF2	T_cells	3.29744e-28	-0.860615	0.016	0.296	4.69325e-24
ACOT7	T_cells	3.39979e-28	-0.591921	0.032	0.33	4.83892e-24
APOL1	T_cells	3.70651e-28	-0.704344	0.024	0.311	5.27548e-24
SRGAP1	T_cells	3.98232e-28	-0.559366	0.008	0.279	5.66803e-24
NPTN	T_cells	4.04578e-28	-0.533388	0.008	0.279	5.75836e-24
TRIP10	T_cells	4.12804e-28	-0.655559	0.005	0.272	5.87544e-24
P4HB	T_cells	4.6467e-28	-0.659865	0.276	0.803	6.61366e-24
IGFBP2	T_cells	4.73909e-28	-1.21511	0.014	0.289	6.74515e-24
DIXDC1	T_cells	4.86732e-28	-0.645516	0	0.261	6.92766e-24
COL3A1	T_cells	5.44793e-28	-1.45524	0.03	0.311	7.75404e-24
RCAN1	T_cells	6.62397e-28	-1.04028	0.011	0.28	9.42789e-24
SDC4	T_cells	6.74084e-28	-0.783875	0.046	0.355	9.59423e-24
ID4	T_cells	6.8069e-28	-0.934752	0	0.26	9.68826e-24
PTGR1	T_cells	7.4059e-28	-0.649267	0.011	0.283	1.05408e-23
MXRA5	T_cells	8.04779e-28	-0.638009	0	0.259	1.14544e-23
PLK2	T_cells	8.10536e-28	-0.533822	0.062	0.387	1.15364e-23
LDOC1	T_cells	1.024e-27	-0.509443	0.014	0.287	1.45746e-23
GALE	T_cells	1.03382e-27	-0.569551	0.022	0.304	1.47143e-23
EIF4A2	T_cells	1.18624e-27	0.644432	0.705	0.872	1.68837e-23
AQP1	T_cells	1.41101e-27	-1.49257	0.014	0.283	2.00829e-23
TFPI2	T_cells	1.44767e-27	-0.990686	0.022	0.302	2.06047e-23
WASL	T_cells	1.68442e-27	-0.536837	0.014	0.286	2.39743e-23
GNPDA1	T_cells	1.76431e-27	-0.522336	0.019	0.296	2.51114e-23
ECM1	T_cells	1.85477e-27	-0.80695	0	0.256	2.63989e-23
SHISA4	T_cells	1.86397e-27	-0.567284	0.003	0.262	2.65299e-23
EFEMP2	T_cells	2.15816e-27	-1.00013	0.005	0.267	3.07171e-23
YAP1	T_cells	2.19083e-27	-0.566752	0	0.256	3.1182e-23
SPRED1	T_cells	2.58737e-27	-0.628555	0	0.255	3.6826e-23
ATP1B1	T_cells	2.72979e-27	-0.530089	0.032	0.323	3.88531e-23
CSE1L	T_cells	2.99312e-27	-0.505832	0.019	0.295	4.2601e-23
LINC00973	T_cells	3.05521e-27	-0.870605	0	0.255	4.34849e-23
ATP6V0B	T_cells	3.31459e-27	-0.548406	0.265	0.782	4.71765e-23
DFNA5	T_cells	3.60709e-27	-0.554362	0	0.254	5.13397e-23
MMAB	T_cells	3.71084e-27	-0.506805	0.016	0.289	5.28164e-23
ISG20	T_cells	3.78744e-27	1.7143	0.468	0.303	5.39066e-23
CPVL	T_cells	4.06353e-27	-1.01161	0.011	0.274	5.78363e-23
LAMB2	T_cells	4.17597e-27	-0.729643	0.003	0.259	5.94366e-23
PIGS	T_cells	4.18517e-27	-0.503497	0.008	0.271	5.95676e-23
PTGFRN	T_cells	4.25799e-27	-0.55105	0	0.253	6.06039e-23
MT1E	T_cells	4.73141e-27	-0.564235	0.07	0.394	6.73422e-23
SNRNP25	T_cells	5.19654e-27	-0.511275	0.022	0.299	7.39623e-23
FAM26F	T_cells	5.61187e-27	-0.900604	0.011	0.275	7.98738e-23
CRIM1	T_cells	5.90217e-27	-0.752401	0.003	0.258	8.40056e-23
CTTNBP2NL	T_cells	6.49024e-27	-0.647156	0.008	0.269	9.23756e-23
SLC2A1	T_cells	6.50427e-27	-0.597142	0.03	0.313	9.25753e-23
ORAI3	T_cells	6.63378e-27	-0.519965	0.019	0.291	9.44186e-23
LIPA	T_cells	6.77738e-27	-0.650964	0.049	0.35	9.64625e-23
SIGLEC15	T_cells	7.003e-27	-0.798515	0.005	0.263	9.96737e-23
ROCK2	T_cells	7.33604e-27	-0.503898	0.022	0.296	1.04414e-22
RNH1	T_cells	7.56715e-27	-0.526975	0.262	0.797	1.07703e-22
SLC20A1	T_cells	8.92266e-27	-0.563762	0.097	0.448	1.26996e-22
SEMA3C	T_cells	9.78828e-27	-0.662589	0.005	0.262	1.39317e-22
NDRG1	T_cells	1.01479e-26	-0.53149	0.076	0.401	1.44435e-22
PEMT	T_cells	1.27942e-26	-0.519686	0.011	0.273	1.821e-22
SMCO4	T_cells	1.46704e-26	-0.643668	0.022	0.293	2.08804e-22
PKP3	T_cells	1.53414e-26	-0.74033	0.011	0.272	2.18355e-22
MET	T_cells	1.61021e-26	-0.583611	0.003	0.255	2.29182e-22
CD44	T_cells	1.77628e-26	0.7976	0.635	0.575	2.52817e-22
PDLIM3	T_cells	1.77754e-26	-1.05009	0.011	0.269	2.52997e-22
IGF2BP2	T_cells	2.23418e-26	-0.53416	0.003	0.253	3.17991e-22
ITGB2	T_cells	2.35714e-26	1.18367	0.414	0.2	3.35492e-22
PERP	T_cells	2.47689e-26	-0.882608	0.135	0.485	3.52536e-22
FERMT1	T_cells	2.86286e-26	-0.705357	0.014	0.276	4.07471e-22
MYO1B	T_cells	3.07576e-26	-0.629946	0.003	0.252	4.37773e-22
TWSG1	T_cells	3.63941e-26	-0.570179	0.003	0.252	5.17998e-22
TNFAIP1	T_cells	4.18376e-26	-0.601694	0.005	0.257	5.95475e-22
DUSP3	T_cells	4.24999e-26	-0.578216	0.005	0.257	6.04901e-22
SERPINB5	T_cells	5.05589e-26	-0.694073	0.005	0.256	7.19604e-22
PCOLCE	T_cells	5.12646e-26	-1.24268	0.022	0.283	7.2965e-22
PAX8	T_cells	5.51551e-26	-0.636087	0.014	0.273	7.85022e-22
ZNF385A	T_cells	5.89484e-26	-0.618689	0.003	0.25	8.39012e-22
FNDC4	T_cells	6.97042e-26	-0.56237	0.005	0.255	9.921e-22
ACER3	T_cells	7.0427e-26	-0.551094	0.014	0.272	1.00239e-21
FOS	T_cells	9.48041e-26	0.598557	0.784	0.873	1.34935e-21
PBX1	T_cells	1.07608e-25	-0.735942	0.005	0.252	1.53158e-21
HSBP1L1	T_cells	1.11155e-25	-0.529461	0.011	0.264	1.58206e-21
ARF4	T_cells	1.13285e-25	-0.603357	0.246	0.732	1.61239e-21
SLC26A2	T_cells	1.13717e-25	-0.503147	0.03	0.304	1.61853e-21
FADS3	T_cells	1.27366e-25	-0.521745	0.019	0.282	1.81279e-21
RGL2	T_cells	1.34817e-25	-0.535831	0.016	0.276	1.91885e-21
TCF7L2	T_cells	1.37292e-25	-0.574323	0.005	0.252	1.95408e-21
HSPA1B	T_cells	1.60714e-25	1.22713	0.624	0.656	2.28744e-21
CD24	T_cells	1.7089e-25	-0.806847	0.008	0.257	2.43228e-21
MTUS1	T_cells	1.73921e-25	-1.02608	0.005	0.25	2.47542e-21
LAMA3	T_cells	1.75029e-25	-0.817839	0.008	0.257	2.49118e-21
WNT5A	T_cells	1.86187e-25	-0.547057	0.005	0.252	2.64999e-21
GSTP1	T_cells	1.98571e-25	-0.675749	0.349	0.907	2.82627e-21
SMAD5	T_cells	2.14068e-25	-0.552704	0.005	0.251	3.04683e-21
CDH13	T_cells	2.3694e-25	-0.532762	0.014	0.268	3.37236e-21
C11orf96	T_cells	2.52168e-25	-1.11985	0.016	0.27	3.58911e-21
PECAM1	T_cells	2.73716e-25	-1.27466	0.019	0.275	3.8958e-21
AEBP1	T_cells	2.89876e-25	-1.19324	0.011	0.259	4.12581e-21
P3H4	T_cells	2.97692e-25	-0.576516	0.005	0.25	4.23705e-21
PDIA5	T_cells	3.00662e-25	-0.519724	0.005	0.25	4.27932e-21
LAPTM4B	T_cells	3.25753e-25	-0.625384	0.032	0.304	4.63645e-21
UGCG	T_cells	4.11539e-25	-0.549613	0.059	0.355	5.85743e-21
KRT17	T_cells	4.65824e-25	-0.948114	0.138	0.463	6.63008e-21
TNFRSF11B	T_cells	5.2172e-25	-1.0543	0.032	0.299	7.42564e-21
POSTN	T_cells	5.36549e-25	-1.26894	0.024	0.281	7.6367e-21
RARRES2	T_cells	5.52878e-25	-1.35748	0.008	0.252	7.86911e-21
KIF1BP	T_cells	5.90698e-25	-0.50559	0.014	0.265	8.4074e-21
CLEC11A	T_cells	5.99392e-25	-1.01361	0.016	0.269	8.53114e-21
FABP5	T_cells	6.79402e-25	-0.619092	0.211	0.63	9.66993e-21
DCN	T_cells	9.9172e-25	-1.51478	0.03	0.282	1.41151e-20
KRT7	T_cells	1.05168e-24	-0.88141	0.124	0.446	1.49686e-20
C16orf45	T_cells	1.06064e-24	-0.566812	0.008	0.251	1.50962e-20
CXCL16	T_cells	1.15485e-24	-0.726024	0.016	0.267	1.6437e-20
HSD17B4	T_cells	1.68838e-24	-0.55096	0.016	0.266	2.40307e-20
PGD	T_cells	1.79204e-24	-0.542104	0.019	0.272	2.55061e-20
HSPH1	T_cells	2.44325e-24	1.0623	0.635	0.683	3.47748e-20
PARVB	T_cells	2.44511e-24	-0.633437	0.022	0.274	3.48013e-20
STK17A	T_cells	2.97403e-24	1.38709	0.532	0.449	4.23293e-20
PGF	T_cells	3.00357e-24	-0.713061	0.011	0.252	4.27499e-20
EPCAM	T_cells	3.22247e-24	-0.646109	0.011	0.253	4.58654e-20
YES1	T_cells	3.60149e-24	-0.500064	0.011	0.252	5.126e-20
TSPAN1	T_cells	3.82513e-24	-0.681598	0.024	0.279	5.44431e-20
SPRY1	T_cells	4.32305e-24	-1.24484	0.041	0.3	6.15299e-20
BST2	T_cells	4.47348e-24	-0.527932	0.281	0.764	6.3671e-20
APOE	T_cells	4.61259e-24	-1.19002	0.059	0.332	6.56511e-20
SORBS3	T_cells	6.25849e-24	-0.542144	0.016	0.262	8.90771e-20
LY96	T_cells	6.30068e-24	-0.832337	0.041	0.307	8.96776e-20
CYHR1	T_cells	6.63014e-24	-0.509337	0.014	0.256	9.43668e-20
SEPT1	T_cells	8.23029e-24	1.52414	0.278	0.107	1.17142e-19
SLC38A5	T_cells	1.09594e-23	-0.520683	0.014	0.254	1.55985e-19
MT1X	T_cells	1.16492e-23	-0.643246	0.138	0.483	1.65803e-19
DBN1	T_cells	3.24296e-23	-0.513673	0.014	0.25	4.6157e-19
LAMC2	T_cells	3.59456e-23	-0.87731	0.068	0.348	5.11613e-19
C15orf48	T_cells	6.46317e-23	-0.862494	0.024	0.266	9.19903e-19
CRLF1	T_cells	8.81349e-23	-0.751701	0.019	0.257	1.25442e-18
APBB1IP	T_cells	9.9347e-23	1.29535	0.257	0.093	1.41401e-18
BATF	T_cells	1.19461e-22	1.59118	0.268	0.103	1.70029e-18
IGFBP3	T_cells	1.28687e-22	-0.99077	0.027	0.268	1.8316e-18
NCOA7	T_cells	1.40386e-22	-0.614751	0.092	0.387	1.99811e-18
APOD	T_cells	1.38821e-21	-0.870964	0.027	0.259	1.97584e-17
IRF1	T_cells	3.21755e-21	1.25264	0.554	0.514	4.57953e-17
ICAM3	T_cells	4.28513e-20	1.62189	0.395	0.249	6.09902e-16
ARHGAP15	T_cells	8.90282e-20	1.25887	0.251	0.099	1.26714e-15
CLK1	T_cells	1.73002e-19	1.19431	0.565	0.574	2.46234e-15
SUB1	T_cells	7.56707e-19	0.573411	0.649	0.837	1.07702e-14
ID2	T_cells	2.38362e-18	1.00288	0.603	0.663	3.3926e-14
PKM	T_cells	4.44297e-18	-0.558067	0.416	0.87	6.32368e-14
LEPROTL1	T_cells	5.53677e-18	1.45774	0.508	0.47	7.88049e-14
TSPYL2	T_cells	1.44772e-17	1.44935	0.357	0.216	2.06053e-13
GPSM3	T_cells	2.34943e-17	1.23613	0.427	0.304	3.34394e-13
PTGER4	T_cells	2.40142e-17	1.38674	0.257	0.114	3.41794e-13
HSP90B1	T_cells	3.22409e-17	-0.502604	0.368	0.874	4.58885e-13
ELF1	T_cells	6.85836e-17	1.26637	0.524	0.505	9.76151e-13
RP11-138A9.1	T_cells	8.15513e-17	1.39623	0.305	0.163	1.16072e-12
HLA-DMB	T_cells	1.01623e-16	-0.786253	0.065	0.28	1.4464e-12
PPP1R15A	T_cells	1.16714e-16	0.652847	0.662	0.779	1.6612e-12
HCLS1	T_cells	3.17938e-16	1.21452	0.322	0.182	4.52522e-12
BTG2	T_cells	3.34188e-16	1.04127	0.554	0.54	4.75649e-12
FCER1G	T_cells	3.80481e-16	-1.04476	0.062	0.26	5.41539e-12
RGS2	T_cells	1.91995e-15	1.05676	0.541	0.5	2.73266e-11
STK17B	T_cells	4.89865e-15	1.51765	0.378	0.265	6.97225e-11
LCP1	T_cells	6.31278e-15	1.24253	0.441	0.352	8.98499e-11
LDHB	T_cells	1.67231e-14	0.595158	0.622	0.818	2.3802e-10
ZNF331	T_cells	3.52091e-14	1.28607	0.365	0.242	5.01132e-10
TUBA4A	T_cells	4.40256e-14	1.51696	0.414	0.337	6.26616e-10
WIPF1	T_cells	5.56907e-14	1.40253	0.357	0.246	7.92646e-10
EMP3	T_cells	8.05865e-14	0.515268	0.605	0.689	1.14699e-09
HLA-DRA	T_cells	8.70474e-14	-0.516613	0.414	0.691	1.23895e-09
DUSP4	T_cells	2.56818e-13	1.62086	0.341	0.233	3.65529e-09
SRSF5	T_cells	3.2082e-13	0.804238	0.6	0.767	4.56623e-09
CDC42SE2	T_cells	3.94379e-13	1.44823	0.319	0.205	5.6132e-09
HMGB2	T_cells	4.31189e-13	1.11378	0.481	0.455	6.13711e-09
UBE2D3	T_cells	9.61942e-13	0.566911	0.614	0.834	1.36913e-08
ANXA1	T_cells	1.6076e-12	0.654993	0.624	0.852	2.2881e-08
HNRNPDL	T_cells	3.92287e-11	0.580446	0.6	0.818	5.58342e-07
PPP2R5C	T_cells	5.99474e-11	1.45292	0.378	0.311	8.53232e-07
FYN	T_cells	9.15744e-11	1.38766	0.297	0.199	1.30338e-06
ALOX5AP	T_cells	1.50001e-10	0.84061	0.397	0.268	2.13497e-06
NFKBIA	T_cells	1.97512e-10	0.640907	0.619	0.709	2.81119e-06
GIMAP7	T_cells	2.58367e-10	0.984288	0.322	0.219	3.67733e-06
SOCS1	T_cells	5.27487e-10	1.28874	0.251	0.151	7.50772e-06
PSMB9	T_cells	9.48979e-10	0.837342	0.524	0.621	1.35068e-05
COTL1	T_cells	2.09769e-09	0.808288	0.541	0.624	2.98564e-05
DEDD2	T_cells	2.52796e-09	1.38818	0.37	0.318	3.59805e-05
RHOF	T_cells	4.61792e-09	1.38198	0.251	0.162	6.57268e-05
FOSB	T_cells	1.04702e-08	0.557485	0.592	0.7	0.000149022
FUS	T_cells	1.20603e-08	0.706056	0.57	0.791	0.000171654
GYPC	T_cells	1.40071e-08	1.06089	0.338	0.272	0.000199363
SEPT6	T_cells	3.25058e-08	1.09695	0.281	0.199	0.000462654
EIF3F	T_cells	3.38886e-08	0.504246	0.578	0.824	0.000482336
PPP1R2	T_cells	3.88929e-08	1.26812	0.454	0.501	0.000553563
PBXIP1	T_cells	6.20701e-08	1.27274	0.335	0.283	0.000883443
TNFAIP8	T_cells	8.2876e-08	1.21295	0.292	0.219	0.00117957
ZFP36	T_cells	1.09848e-07	0.541104	0.624	0.731	0.00156347
GPBP1	T_cells	1.19766e-07	1.00999	0.492	0.596	0.00170462
CYCS	T_cells	1.54121e-07	0.7031	0.546	0.735	0.00219361
CIB1	T_cells	2.08155e-07	0.537161	0.538	0.719	0.00296268
APOBEC3G	T_cells	2.30736e-07	1.22692	0.37	0.35	0.00328407
HERPUD1	T_cells	6.51863e-07	0.766802	0.541	0.717	0.00927797
HSPA6	T_cells	6.5623e-07	1.30783	0.4	0.385	0.00934012
CLEC2B	T_cells	7.53176e-07	0.880059	0.497	0.609	0.01072
PIK3IP1	T_cells	1.09122e-06	1.24359	0.289	0.232	0.0155313
YPEL5	T_cells	1.15386e-06	1.08616	0.473	0.563	0.0164229
REL	T_cells	1.60754e-06	1.08861	0.4	0.399	0.0228801
GIMAP4	T_cells	1.65636e-06	0.947396	0.286	0.225	0.023575
SYNE2	T_cells	3.36741e-06	1.00499	0.389	0.39	0.0479283
SFN	Epithelial_cells	0	2.35127	0.954	0.059	0
KRT8	Epithelial_cells	0	2.32597	0.996	0.116	0
CLDN4	Epithelial_cells	0	2.28103	0.95	0.042	0
KRT5	Epithelial_cells	0	2.27852	0.885	0.053	0
CAPS	Epithelial_cells	0	2.11532	0.945	0.058	0
C19orf33	Epithelial_cells	0	1.97334	0.914	0.039	0
HMGA2	Epithelial_cells	0	1.94634	0.807	0.017	0
PKP3	Epithelial_cells	0	1.79236	0.859	0.012	0
FERMT1	Epithelial_cells	0	1.76194	0.859	0.016	0
SERPINB5	Epithelial_cells	0	1.62187	0.807	0.01	0
PAX8	Epithelial_cells	0	1.5727	0.836	0.021	0
GPR87	Epithelial_cells	0	1.45038	0.782	0.005	0
LAMB3	Epithelial_cells	3.83723e-307	1.93201	0.861	0.043	5.46153e-303
SIGLEC15	Epithelial_cells	1.08251e-306	1.7191	0.807	0.018	1.54074e-302
SERINC2	Epithelial_cells	5.52766e-304	2.01152	0.983	0.132	7.86752e-300
TSPAN1	Epithelial_cells	9.87221e-304	1.77448	0.838	0.029	1.40511e-299
SLITRK6	Epithelial_cells	1.47588e-303	1.68486	0.779	0.011	2.10061e-299
SDC4	Epithelial_cells	1.02396e-299	1.89762	0.945	0.083	1.4574e-295
DHRS2	Epithelial_cells	2.00804e-297	2.01766	0.83	0.034	2.85805e-293
PPP1R14C	Epithelial_cells	2.40691e-296	1.3677	0.75	0.006	3.42576e-292
LINC00973	Epithelial_cells	4.96542e-292	1.70214	0.777	0.017	7.06728e-288
SLC14A1	Epithelial_cells	1.39872e-289	2.23557	0.92	0.097	1.9908e-285
MLPH	Epithelial_cells	1.42422e-289	1.48048	0.861	0.046	2.02709e-285
SLPI	Epithelial_cells	3.35239e-289	1.88254	0.823	0.035	4.77145e-285
KCNN4	Epithelial_cells	1.43412e-286	1.58055	0.863	0.047	2.04119e-282
AGR2	Epithelial_cells	7.41504e-285	1.79869	0.739	0.012	1.05538e-280
KRT19	Epithelial_cells	1.25285e-283	2.40797	0.996	0.216	1.78319e-279
ITGA3	Epithelial_cells	5.97809e-282	1.97377	0.884	0.077	8.50862e-278
KRT7	Epithelial_cells	5.44741e-279	2.34869	0.987	0.186	7.75329e-275
KCNJ15	Epithelial_cells	1.16417e-274	1.45556	0.849	0.05	1.65697e-270
EPCAM	Epithelial_cells	2.31807e-274	1.54583	0.76	0.024	3.29931e-270
DSP	Epithelial_cells	8.73505e-274	1.47551	0.834	0.044	1.24326e-269
LAMC2	Epithelial_cells	9.78177e-274	2.24648	0.889	0.098	1.39224e-269
ITGB6	Epithelial_cells	3.83041e-273	1.428	0.729	0.014	5.45182e-269
SLC2A1	Epithelial_cells	3.98494e-273	1.42711	0.865	0.059	5.67176e-269
KRT17	Epithelial_cells	1.68166e-271	2.27693	0.985	0.209	2.39351e-267
LAD1	Epithelial_cells	1.55568e-268	1.21059	0.695	0.006	2.2142e-264
EPS8L2	Epithelial_cells	4.31024e-268	1.31494	0.798	0.036	6.13476e-264
PERP	Epithelial_cells	1.24541e-265	2.03171	0.998	0.228	1.77259e-261
ITGA2	Epithelial_cells	3.87254e-265	1.64038	0.851	0.066	5.51178e-261
SDC1	Epithelial_cells	6.33063e-264	1.76013	0.971	0.114	9.01039e-260
KRT18	Epithelial_cells	1.18227e-263	1.98579	0.99	0.186	1.68272e-259
CDCP1	Epithelial_cells	3.61174e-262	1.33025	0.8	0.045	5.14059e-258
TACSTD2	Epithelial_cells	9.79034e-261	1.87462	0.92	0.101	1.39346e-256
CRLF1	Epithelial_cells	1.08923e-260	1.83191	0.752	0.034	1.5503e-256
TNS4	Epithelial_cells	2.69263e-257	1.06036	0.664	0.005	3.83242e-253
PLEK2	Epithelial_cells	9.3267e-254	1.52912	0.836	0.067	1.32747e-249
IRF6	Epithelial_cells	2.85127e-253	1.03247	0.664	0.007	4.05822e-249
COL17A1	Epithelial_cells	3.13814e-253	1.35485	0.7	0.017	4.46651e-249
NT5E	Epithelial_cells	3.55008e-251	1.90817	0.853	0.099	5.05283e-247
SPINT1	Epithelial_cells	1.75568e-250	1.48203	0.872	0.084	2.49885e-246
SYTL1	Epithelial_cells	2.74388e-248	1.07924	0.826	0.051	3.90536e-244
WNT7A	Epithelial_cells	7.39731e-246	1.34119	0.634	0.004	1.05286e-241
LAMA3	Epithelial_cells	2.11009e-245	1.66781	0.737	0.036	3.00329e-241
WFDC2	Epithelial_cells	2.7345e-245	1.6183	0.691	0.021	3.89202e-241
TFPI2	Epithelial_cells	7.51533e-245	1.97906	0.798	0.068	1.06966e-240
RNF128	Epithelial_cells	9.87455e-240	0.972085	0.641	0.009	1.40544e-235
DCBLD2	Epithelial_cells	2.07922e-239	1.93187	0.817	0.103	2.95936e-235
ULBP2	Epithelial_cells	4.73136e-239	1.21454	0.758	0.042	6.73414e-235
TNNT1	Epithelial_cells	7.93699e-239	1.17421	0.651	0.013	1.12967e-234
EVA1A	Epithelial_cells	3.3733e-238	1.33134	0.773	0.055	4.80122e-234
COL7A1	Epithelial_cells	2.07159e-237	1.7783	0.798	0.077	2.94849e-233
MFI2	Epithelial_cells	3.36584e-236	1.15268	0.66	0.017	4.79061e-232
FAM83A	Epithelial_cells	1.0024e-234	0.984549	0.601	0.002	1.42672e-230
JUP	Epithelial_cells	6.48644e-234	1.30287	0.849	0.083	9.23215e-230
PTPRU	Epithelial_cells	3.90644e-232	1.04181	0.651	0.016	5.56004e-228
STX1A	Epithelial_cells	1.36345e-231	1.04748	0.67	0.022	1.94059e-227
LYPD3	Epithelial_cells	1.42387e-230	1.28249	0.721	0.037	2.0266e-226
TNFRSF11B	Epithelial_cells	4.11463e-230	2.08721	0.775	0.075	5.85636e-226
PPP1R13L	Epithelial_cells	2.09122e-228	1.13629	0.781	0.06	2.97643e-224
SOX9	Epithelial_cells	3.10884e-227	1.06463	0.635	0.014	4.42482e-223
CD24	Epithelial_cells	1.76009e-225	1.4791	0.718	0.043	2.50513e-221
CAMK2N1	Epithelial_cells	1.95852e-224	1.42535	0.866	0.111	2.78756e-220
SEMA3C	Epithelial_cells	3.10251e-224	1.27678	0.725	0.044	4.4158e-220
SPINT2	Epithelial_cells	5.87658e-223	1.66803	0.99	0.222	8.36414e-219
ERICH3	Epithelial_cells	9.10753e-222	1.14329	0.574	0.003	1.29628e-217
RP11-277P12.20	Epithelial_cells	1.29269e-221	0.984551	0.584	0.005	1.83988e-217
DSG2	Epithelial_cells	3.66129e-221	1.06992	0.698	0.037	5.21111e-217
CCND1	Epithelial_cells	7.74447e-221	1.6849	0.899	0.156	1.10227e-216
FXYD3	Epithelial_cells	2.30442e-220	1.76735	0.632	0.021	3.27989e-216
BIK	Epithelial_cells	2.3254e-220	1.073	0.639	0.019	3.30974e-216
BCAS4	Epithelial_cells	2.30256e-219	0.882093	0.7	0.035	3.27723e-215
HRAS	Epithelial_cells	3.07374e-219	1.54742	0.893	0.166	4.37485e-215
MYEOV	Epithelial_cells	6.70923e-218	1.03576	0.58	0.006	9.54925e-214
ANXA8L1	Epithelial_cells	5.77045e-216	0.872343	0.569	0.004	8.21308e-212
GJB3	Epithelial_cells	4.69259e-215	0.963305	0.574	0.006	6.67897e-211
SLC38A5	Epithelial_cells	4.75731e-215	1.21488	0.702	0.045	6.77108e-211
LINC00958	Epithelial_cells	1.06507e-214	0.868076	0.559	0.003	1.51592e-210
PMEPA1	Epithelial_cells	1.18668e-214	1.85634	0.893	0.21	1.689e-210
SPOCK1	Epithelial_cells	1.27902e-214	1.34157	0.754	0.071	1.82042e-210
TUSC3	Epithelial_cells	1.09425e-212	1.30167	0.905	0.137	1.55745e-208
RP11-357H14.17	Epithelial_cells	1.42201e-212	0.832876	0.569	0.006	2.02395e-208
DDR1	Epithelial_cells	8.09909e-212	0.888201	0.634	0.022	1.15274e-207
RASSF7	Epithelial_cells	9.57289e-212	1.12102	0.777	0.07	1.36251e-207
CRTC1	Epithelial_cells	3.9407e-211	1.15016	0.685	0.041	5.6088e-207
PTPRF	Epithelial_cells	4.12434e-210	0.957948	0.672	0.035	5.87018e-206
TRIM29	Epithelial_cells	9.70729e-210	0.818615	0.548	0.003	1.38164e-205
ITGB4	Epithelial_cells	4.46672e-209	1.40293	0.834	0.099	6.35748e-205
ANXA3	Epithelial_cells	7.72568e-209	1.25045	0.62	0.023	1.0996e-204
SEMA4B	Epithelial_cells	3.16281e-204	1.00357	0.683	0.041	4.50163e-200
MAMDC2	Epithelial_cells	4.53843e-203	0.836691	0.582	0.014	6.45955e-199
CST4	Epithelial_cells	6.12274e-203	1.47025	0.595	0.019	8.71449e-199
PTN	Epithelial_cells	6.44442e-203	1.77858	0.84	0.141	9.17234e-199
HOXB6	Epithelial_cells	1.06233e-202	0.955786	0.714	0.053	1.51202e-198
PTGES	Epithelial_cells	1.46284e-202	1.27299	0.668	0.041	2.08207e-198
CSPG4	Epithelial_cells	9.82681e-202	1.06066	0.634	0.028	1.39865e-197
HOXB7	Epithelial_cells	3.68554e-201	1.02013	0.851	0.099	5.24563e-197
HLA-B	Epithelial_cells	2.39909e-200	-0.992852	0.998	0.987	3.41462e-196
AGRN	Epithelial_cells	2.8642e-200	1.164	0.754	0.076	4.07662e-196
B2M	Epithelial_cells	3.11301e-200	-0.707638	1	1	4.43074e-196
BAIAP2L1	Epithelial_cells	3.6187e-200	0.890951	0.666	0.039	5.1505e-196
DAPL1	Epithelial_cells	6.51412e-200	1.47636	0.651	0.04	9.27154e-196
GPRC5C	Epithelial_cells	7.22008e-199	1.07199	0.813	0.085	1.02763e-194
STRA6	Epithelial_cells	2.97182e-198	1.16097	0.748	0.071	4.22979e-194
RHOD	Epithelial_cells	1.32024e-197	1.20582	0.809	0.108	1.87909e-193
MALAT1	Epithelial_cells	1.13719e-196	-0.91133	0.981	0.995	1.61856e-192
SERPINE1	Epithelial_cells	1.388e-196	1.44214	0.79	0.097	1.97554e-192
GALE	Epithelial_cells	4.92712e-196	1.088	0.767	0.081	7.01277e-192
TNFRSF12A	Epithelial_cells	6.39772e-196	1.66556	0.943	0.262	9.10588e-192
HLA-C	Epithelial_cells	3.12259e-195	-0.862154	0.992	0.988	4.44439e-191
SEMA7A	Epithelial_cells	1.84246e-194	0.970214	0.611	0.028	2.62237e-190
ANXA8	Epithelial_cells	7.49972e-194	0.748315	0.51	0.002	1.06743e-189
TNC	Epithelial_cells	1.28995e-193	1.33014	0.7	0.061	1.83598e-189
HLA-A	Epithelial_cells	1.5265e-193	-1.01474	0.998	0.985	2.17267e-189
SEC14L2	Epithelial_cells	1.90479e-193	0.867953	0.58	0.02	2.71108e-189
DSC3	Epithelial_cells	3.01327e-193	0.773176	0.519	0.005	4.28878e-189
GPC1	Epithelial_cells	6.04901e-193	1.08705	0.773	0.086	8.60956e-189
LSR	Epithelial_cells	9.26149e-193	1.06941	0.817	0.093	1.31819e-188
PDLIM4	Epithelial_cells	1.44049e-190	1.45885	0.899	0.208	2.05025e-186
KLF5	Epithelial_cells	4.65432e-189	1.04497	0.574	0.021	6.6245e-185
ALG1L	Epithelial_cells	3.4712e-188	0.714383	0.502	0.003	4.94056e-184
NDFIP2	Epithelial_cells	7.20701e-188	0.974563	0.84	0.114	1.02577e-183
LINC00704	Epithelial_cells	4.29708e-187	0.830915	0.498	0.003	6.11604e-183
RP5-907D15.4	Epithelial_cells	4.82456e-187	0.814889	0.515	0.007	6.8668e-183
KIZ	Epithelial_cells	4.5948e-186	1.05099	0.742	0.079	6.53978e-182
CDH13	Epithelial_cells	1.19538e-185	0.991836	0.702	0.061	1.70139e-181
CDH2	Epithelial_cells	1.42121e-185	0.857583	0.561	0.02	2.02281e-181
LARP6	Epithelial_cells	2.70765e-185	1.09382	0.8	0.106	3.8538e-181
AC003092.1	Epithelial_cells	3.36798e-185	0.837756	0.494	0.003	4.79365e-181
EREG	Epithelial_cells	3.02375e-184	1.07456	0.624	0.037	4.30371e-180
EPHA2	Epithelial_cells	1.28772e-183	0.978316	0.66	0.051	1.83281e-179
ANGPTL4	Epithelial_cells	2.42154e-183	1.54303	0.719	0.084	3.44658e-179
RPL10	Epithelial_cells	7.15208e-183	-0.684964	1	0.999	1.01796e-178
CH17-360D5.2	Epithelial_cells	1.53559e-182	0.696892	0.477	0.001	2.18561e-178
S100A2	Epithelial_cells	2.5283e-182	1.32062	0.996	0.729	3.59854e-178
HMGA1	Epithelial_cells	3.0674e-182	1.51343	0.914	0.215	4.36582e-178
SERPINE2	Epithelial_cells	8.23081e-182	1.67877	0.807	0.153	1.17149e-177
PORCN	Epithelial_cells	8.87583e-182	1.11939	0.628	0.044	1.2633e-177
RPS23	Epithelial_cells	1.65632e-181	-0.737686	0.998	0.992	2.35744e-177
FAM210B	Epithelial_cells	2.04518e-181	1.19089	0.876	0.161	2.91091e-177
GALNT3	Epithelial_cells	3.70383e-181	0.689297	0.546	0.017	5.27166e-177
PLXNA1	Epithelial_cells	5.1239e-181	0.850728	0.609	0.037	7.29285e-177
MCF2	Epithelial_cells	2.19257e-180	0.729194	0.475	0.001	3.12068e-176
SLC26A2	Epithelial_cells	4.6974e-179	1.11892	0.74	0.092	6.68581e-175
ARL4D	Epithelial_cells	1.07245e-178	0.919048	0.744	0.081	1.52642e-174
FHL2	Epithelial_cells	2.18679e-178	1.2773	0.941	0.198	3.11246e-174
GJB5	Epithelial_cells	5.38182e-178	0.706421	0.469	0.001	7.65994e-174
RGS12	Epithelial_cells	6.36949e-177	0.918784	0.761	0.09	9.06569e-173
ST6GALNAC2	Epithelial_cells	7.5464e-176	0.740598	0.513	0.012	1.07408e-171
S100A14	Epithelial_cells	1.16856e-174	1.1595	0.51	0.014	1.66321e-170
PTMA	Epithelial_cells	1.44496e-174	-0.629115	1	0.997	2.05661e-170
TBX3	Epithelial_cells	5.80633e-174	0.912702	0.786	0.099	8.26415e-170
CDH3	Epithelial_cells	6.61117e-174	0.787436	0.487	0.008	9.40968e-170
EEF1A1	Epithelial_cells	8.85361e-174	-0.641148	1	0.999	1.26013e-169
RP11-350J20.12	Epithelial_cells	1.23813e-173	0.679673	0.473	0.005	1.76224e-169
GPC4	Epithelial_cells	1.49677e-173	0.828946	0.595	0.037	2.13035e-169
RP11-532F12.5	Epithelial_cells	2.91974e-172	0.758025	0.513	0.015	4.15567e-168
RPL13	Epithelial_cells	8.4208e-172	-0.71099	1	0.999	1.19853e-167
VEGFC	Epithelial_cells	1.55746e-171	0.837945	0.626	0.045	2.21673e-167
AMTN	Epithelial_cells	1.92459e-171	1.3171	0.531	0.022	2.73927e-167
SLC38A1	Epithelial_cells	2.8475e-171	0.802874	0.826	0.112	4.05285e-167
EPHB2	Epithelial_cells	1.14136e-170	0.810848	0.542	0.023	1.6245e-166
SLC35F2	Epithelial_cells	2.25766e-170	0.72399	0.599	0.039	3.21333e-166
BCAR3	Epithelial_cells	2.33419e-170	0.86471	0.626	0.049	3.32225e-166
CDK6	Epithelial_cells	7.94499e-170	1.07956	0.723	0.092	1.13081e-165
NKILA	Epithelial_cells	1.10153e-169	0.745057	0.498	0.013	1.56781e-165
RPS2	Epithelial_cells	2.37523e-169	-0.690656	1	0.995	3.38066e-165
RP11-44F21.5	Epithelial_cells	2.73748e-169	0.704741	0.443	0	3.89626e-165
CLIC3	Epithelial_cells	9.54713e-168	1.33987	0.746	0.103	1.35884e-163
PYGB	Epithelial_cells	2.64564e-167	0.875366	0.708	0.08	3.76554e-163
SH2D4A	Epithelial_cells	3.09956e-167	0.77355	0.546	0.028	4.4116e-163
DFNA5	Epithelial_cells	3.49881e-167	0.839854	0.649	0.06	4.97985e-163
ADGRG1	Epithelial_cells	6.01231e-167	0.823119	0.765	0.093	8.55732e-163
MET	Epithelial_cells	6.05294e-167	0.781971	0.66	0.057	8.61515e-163
SHC4	Epithelial_cells	7.14561e-167	0.711513	0.481	0.01	1.01703e-162
AHNAK2	Epithelial_cells	1.48548e-166	0.978945	0.681	0.072	2.11429e-162
RPS9	Epithelial_cells	2.57703e-166	-0.653756	0.998	0.993	3.66789e-162
UNC13D	Epithelial_cells	1.2108e-165	0.698316	0.702	0.075	1.72334e-161
RTTN	Epithelial_cells	8.0131e-165	0.679743	0.496	0.015	1.14051e-160
RPS6	Epithelial_cells	1.00484e-163	-0.80682	1	0.994	1.4302e-159
RPS24	Epithelial_cells	1.36793e-163	-0.707226	0.996	0.994	1.94697e-159
RPS27	Epithelial_cells	1.36801e-163	-0.777401	1	0.995	1.94708e-159
HSD17B1	Epithelial_cells	1.43111e-163	0.663267	0.464	0.008	2.0369e-159
TCTEX1D2	Epithelial_cells	1.58112e-163	0.71357	0.639	0.056	2.2504e-159
PTK6	Epithelial_cells	1.72052e-163	0.602563	0.441	0.003	2.44882e-159
KRT14	Epithelial_cells	1.76487e-163	1.03045	0.448	0.005	2.51194e-159
SEL1L3	Epithelial_cells	4.00513e-163	0.74405	0.649	0.058	5.7005e-159
TMEM92	Epithelial_cells	6.72148e-163	0.650159	0.521	0.022	9.56668e-159
PTHLH	Epithelial_cells	1.28837e-162	1.01535	0.563	0.037	1.83374e-158
TGFA	Epithelial_cells	1.42686e-162	0.680343	0.481	0.012	2.03085e-158
ENTPD3	Epithelial_cells	1.46823e-162	0.727905	0.498	0.017	2.08974e-158
SLC20A1	Epithelial_cells	4.90877e-162	1.32278	0.876	0.219	6.98665e-158
ABHD2	Epithelial_cells	1.43035e-161	1.08297	0.802	0.138	2.03582e-157
DVL1	Epithelial_cells	2.87458e-161	0.673896	0.532	0.026	4.09139e-157
HOXD1	Epithelial_cells	5.33599e-161	0.763031	0.529	0.026	7.59471e-157
WDR72	Epithelial_cells	5.34418e-161	0.605063	0.426	0.001	7.60638e-157
CD109	Epithelial_cells	1.75437e-160	1.10053	0.765	0.119	2.497e-156
SERPINA1	Epithelial_cells	4.50868e-160	1.53219	0.866	0.206	6.41721e-156
ATP1B1	Epithelial_cells	5.15043e-160	0.953937	0.754	0.108	7.33061e-156
RPL34	Epithelial_cells	8.12018e-160	-0.758279	1	0.997	1.15575e-155
COL9A2	Epithelial_cells	8.90168e-160	0.770594	0.538	0.03	1.26698e-155
KCNK1	Epithelial_cells	1.22813e-159	0.653066	0.504	0.021	1.748e-155
ETV4	Epithelial_cells	1.26378e-159	0.627935	0.466	0.01	1.79874e-155
ABHD11	Epithelial_cells	3.28909e-159	0.757753	0.664	0.07	4.68137e-155
NGEF	Epithelial_cells	3.70709e-159	0.566148	0.437	0.004	5.2763e-155
TOX2	Epithelial_cells	4.5934e-159	0.643801	0.542	0.03	6.53778e-155
PFKFB4	Epithelial_cells	5.82201e-159	0.678416	0.46	0.01	8.28647e-155
ZBED2	Epithelial_cells	5.99825e-159	0.772417	0.45	0.007	8.5373e-155
SERTAD4-AS1	Epithelial_cells	2.00733e-158	0.867867	0.698	0.081	2.85703e-154
S100A1	Epithelial_cells	3.74295e-158	0.925849	0.454	0.009	5.32734e-154
RP5-875H18.9	Epithelial_cells	5.56206e-158	0.643947	0.422	0.001	7.91647e-154
RPL21	Epithelial_cells	2.51293e-157	-0.688368	1	0.996	3.57665e-153
MAL2	Epithelial_cells	4.0392e-157	0.65408	0.431	0.004	5.749e-153
RPS18	Epithelial_cells	9.74289e-157	-0.681125	1	0.996	1.38671e-152
APCDD1L	Epithelial_cells	1.00954e-156	0.606985	0.433	0.005	1.43688e-152
IGF2BP2	Epithelial_cells	1.53226e-156	0.81014	0.635	0.064	2.18087e-152
CITED4	Epithelial_cells	1.97945e-156	0.76009	0.561	0.037	2.81735e-152
HEBP2	Epithelial_cells	2.02913e-156	1.09523	0.893	0.205	2.88807e-152
RPS13	Epithelial_cells	2.20085e-156	-0.691732	1	0.992	3.13248e-152
TXNDC17	Epithelial_cells	2.28275e-156	1.22829	0.979	0.418	3.24904e-152
TP63	Epithelial_cells	2.80761e-156	0.627809	0.424	0.003	3.99607e-152
RTKN	Epithelial_cells	5.50375e-156	0.735517	0.578	0.044	7.83349e-152
MIA	Epithelial_cells	7.19943e-156	0.863333	0.468	0.014	1.0247e-151
ASAP2	Epithelial_cells	8.35633e-156	0.71579	0.658	0.067	1.18936e-151
CD163L1	Epithelial_cells	8.87509e-156	0.648075	0.479	0.015	1.26319e-151
CD58	Epithelial_cells	3.77924e-155	1.18343	0.887	0.211	5.37899e-151
RPS15A	Epithelial_cells	5.76135e-155	-0.741288	0.998	0.988	8.20012e-151
GCLM	Epithelial_cells	1.2053e-154	1.00704	0.725	0.106	1.7155e-150
RPS3A	Epithelial_cells	2.39401e-154	-0.673676	1	0.993	3.4074e-150
BLCAP	Epithelial_cells	4.49592e-154	0.969734	0.885	0.187	6.39904e-150
LRIG3	Epithelial_cells	1.25712e-153	0.778781	0.611	0.056	1.78926e-149
AC093673.5	Epithelial_cells	2.43254e-153	0.785294	0.706	0.09	3.46223e-149
PTTG1	Epithelial_cells	5.08226e-153	1.16188	0.775	0.127	7.23359e-149
PHLDA3	Epithelial_cells	9.0707e-153	1.03089	0.876	0.172	1.29103e-148
PVRL4	Epithelial_cells	1.01386e-152	0.758833	0.448	0.01	1.44302e-148
FAM3C	Epithelial_cells	2.06613e-152	1.27024	0.937	0.342	2.94072e-148
ITPR3	Epithelial_cells	2.36298e-152	0.593982	0.492	0.021	3.36323e-148
TSTD1	Epithelial_cells	3.15742e-152	0.661713	0.803	0.122	4.49395e-148
FTL	Epithelial_cells	3.86276e-152	-0.813284	1	0.982	5.49787e-148
S100A16	Epithelial_cells	4.13551e-152	1.26797	0.977	0.41	5.88608e-148
RPS25	Epithelial_cells	1.63644e-151	-0.71647	1	0.99	2.32914e-147
PSD3	Epithelial_cells	1.76506e-151	0.789353	0.672	0.079	2.51221e-147
TSPAN13	Epithelial_cells	1.84159e-151	0.823151	0.847	0.139	2.62114e-147
RPL19	Epithelial_cells	1.94519e-151	-0.603457	1	0.995	2.76859e-147
PAFAH1B3	Epithelial_cells	3.69365e-151	0.916609	0.855	0.17	5.25717e-147
MRC2	Epithelial_cells	3.84772e-151	1.07617	0.729	0.115	5.47646e-147
RPL13A	Epithelial_cells	4.14569e-151	-0.612793	1	0.999	5.90056e-147
CHMP4C	Epithelial_cells	4.87306e-151	0.578867	0.481	0.019	6.93583e-147
PKIA	Epithelial_cells	7.32913e-151	0.595579	0.466	0.015	1.04316e-146
C6orf141	Epithelial_cells	6.49177e-150	0.705777	0.464	0.015	9.23974e-146
CD3EAP	Epithelial_cells	6.51737e-150	0.811511	0.59	0.055	9.27617e-146
EIF1	Epithelial_cells	6.63349e-150	-0.662574	0.998	0.988	9.44145e-146
STAP2	Epithelial_cells	2.65398e-149	0.747281	0.567	0.046	3.77742e-145
CD82	Epithelial_cells	9.2595e-149	0.999149	0.92	0.224	1.3179e-144
SCG5	Epithelial_cells	9.99189e-149	1.24312	0.672	0.102	1.42215e-144
TWF1	Epithelial_cells	1.1061e-148	1.03361	0.79	0.15	1.57432e-144
FAT2	Epithelial_cells	1.48347e-148	0.603866	0.405	0.003	2.11143e-144
RPL30	Epithelial_cells	1.88981e-148	-0.732227	0.998	0.991	2.68977e-144
BBOX1-AS1	Epithelial_cells	5.37889e-148	0.556883	0.412	0.005	7.65577e-144
STEAP3	Epithelial_cells	5.51502e-148	0.653398	0.525	0.034	7.84953e-144
F11R	Epithelial_cells	1.08631e-147	0.713593	0.685	0.084	1.54615e-143
FZD6	Epithelial_cells	1.20762e-147	0.686349	0.641	0.068	1.7188e-143
SLC17A9	Epithelial_cells	2.04706e-147	0.714697	0.536	0.039	2.91358e-143
BAIAP2	Epithelial_cells	4.34452e-147	0.810095	0.719	0.104	6.18356e-143
KLC3	Epithelial_cells	4.59916e-147	0.602082	0.389	0	6.54599e-143
HOXB8	Epithelial_cells	5.84869e-147	0.659782	0.45	0.014	8.32444e-143
LRP11	Epithelial_cells	1.23657e-146	0.669671	0.544	0.041	1.76001e-142
CRNDE	Epithelial_cells	3.24467e-146	0.705108	0.681	0.084	4.61814e-142
CYSRT1	Epithelial_cells	6.72778e-146	0.648242	0.395	0.002	9.57566e-142
MSMO1	Epithelial_cells	9.55114e-146	0.712485	0.666	0.081	1.35941e-141
LINC01116	Epithelial_cells	1.12587e-145	0.845762	0.761	0.124	1.60246e-141
MST1R	Epithelial_cells	1.54828e-145	0.51337	0.401	0.003	2.20367e-141
SYNDIG1	Epithelial_cells	1.8124e-145	0.687877	0.506	0.03	2.57959e-141
GSTO2	Epithelial_cells	1.88778e-145	0.546348	0.559	0.043	2.68688e-141
C3orf52	Epithelial_cells	2.77431e-145	0.547532	0.414	0.006	3.94867e-141
CRYZ	Epithelial_cells	3.96325e-145	0.662971	0.603	0.06	5.64089e-141
S100A13	Epithelial_cells	4.9811e-145	1.2564	0.945	0.462	7.0896e-141
ELF3	Epithelial_cells	5.4582e-145	1.39232	0.45	0.017	7.76865e-141
RPS27A	Epithelial_cells	7.6429e-145	-0.628601	1	0.997	1.08781e-140
C1orf106	Epithelial_cells	1.02711e-144	0.584905	0.399	0.003	1.46188e-140
CCDC74A	Epithelial_cells	1.22673e-144	0.665633	0.536	0.04	1.74601e-140
RPL3	Epithelial_cells	3.17726e-144	-0.657347	1	0.993	4.5222e-140
EPHX4	Epithelial_cells	6.54272e-144	0.57139	0.487	0.025	9.31226e-140
PTPRK	Epithelial_cells	6.97263e-144	0.758129	0.731	0.106	9.92414e-140
TOMM34	Epithelial_cells	9.33051e-144	0.803279	0.689	0.096	1.32801e-139
DUSP6	Epithelial_cells	1.57877e-142	1.22454	0.889	0.226	2.24706e-138
A4GALT	Epithelial_cells	2.03999e-142	0.889326	0.851	0.162	2.90352e-138
THOC3	Epithelial_cells	2.53658e-142	0.725292	0.702	0.099	3.61031e-138
FAM129B	Epithelial_cells	3.17514e-142	0.87693	0.756	0.126	4.51917e-138
CNIH3	Epithelial_cells	4.91763e-142	0.71942	0.574	0.054	6.99927e-138
RPLP2	Epithelial_cells	6.0223e-142	-0.617884	1	0.996	8.57154e-138
RPL7	Epithelial_cells	7.87025e-142	-0.645818	1	0.99	1.12017e-137
CDCA4	Epithelial_cells	1.23789e-141	0.709688	0.655	0.082	1.76188e-137
RPL12	Epithelial_cells	1.25636e-141	-0.646843	0.998	0.989	1.78818e-137
RPL27A	Epithelial_cells	1.57147e-141	-0.628637	1	0.995	2.23667e-137
RPS20	Epithelial_cells	2.32897e-141	-0.647207	0.998	0.991	3.31483e-137
FSCN1	Epithelial_cells	2.35482e-141	1.26561	0.882	0.288	3.35162e-137
ITGA6	Epithelial_cells	3.43886e-141	1.10222	0.832	0.163	4.89452e-137
TMEM54	Epithelial_cells	5.06671e-141	0.792308	0.74	0.116	7.21144e-137
PFN2	Epithelial_cells	6.33905e-141	0.924243	0.811	0.148	9.02237e-137
FURIN	Epithelial_cells	7.91098e-141	0.66837	0.651	0.079	1.12597e-136
IL11	Epithelial_cells	8.82904e-141	0.627946	0.416	0.01	1.25664e-136
RPL9	Epithelial_cells	1.79219e-140	-0.617706	1	0.988	2.55082e-136
RPS14	Epithelial_cells	3.55167e-140	-0.618221	1	0.994	5.0551e-136
OCIAD2	Epithelial_cells	3.90861e-140	1.21166	0.981	0.342	5.56312e-136
ENPP1	Epithelial_cells	4.81481e-140	1.11746	0.521	0.043	6.85292e-136
TMSB4X	Epithelial_cells	5.35592e-140	-0.578772	1	1	7.62308e-136
PHLDA2	Epithelial_cells	5.92084e-140	1.01069	0.908	0.221	8.42713e-136
TMEM40	Epithelial_cells	1.38248e-139	0.712313	0.389	0.004	1.96768e-135
LINC00511	Epithelial_cells	1.59807e-139	0.565573	0.414	0.01	2.27453e-135
MECOM	Epithelial_cells	1.94094e-139	0.60322	0.613	0.064	2.76254e-135
LTBP2	Epithelial_cells	1.95744e-139	0.678382	0.563	0.052	2.78603e-135
MYO10	Epithelial_cells	1.9959e-139	0.731765	0.676	0.089	2.84077e-135
NSG1	Epithelial_cells	4.68128e-139	0.611651	0.448	0.018	6.66287e-135
SNX7	Epithelial_cells	5.2121e-139	0.864226	0.794	0.146	7.41838e-135
ACOT7	Epithelial_cells	7.95806e-139	0.873998	0.731	0.124	1.13267e-134
WNT5B	Epithelial_cells	1.79986e-138	0.595368	0.41	0.01	2.56174e-134
AIG1	Epithelial_cells	2.77267e-138	0.941788	0.863	0.197	3.94634e-134
TPT1	Epithelial_cells	3.55164e-138	-0.555189	1	0.99	5.05505e-134
GPR153	Epithelial_cells	3.98495e-138	0.559454	0.439	0.017	5.67177e-134
RPL11	Epithelial_cells	5.26201e-138	-0.579731	1	0.995	7.48942e-134
PLCD3	Epithelial_cells	5.29037e-138	0.594665	0.466	0.024	7.52978e-134
TGM2	Epithelial_cells	5.4369e-138	1.34268	0.847	0.26	7.73834e-134
AQP3	Epithelial_cells	2.41436e-137	1.08927	0.733	0.124	3.43635e-133
LRRC8A	Epithelial_cells	2.77156e-137	0.699813	0.683	0.095	3.94476e-133
UCHL3	Epithelial_cells	3.11644e-137	0.978917	0.853	0.204	4.43563e-133
RPL15	Epithelial_cells	6.09533e-137	-0.523902	1	0.994	8.67548e-133
PLXNB2	Epithelial_cells	6.29778e-137	0.751374	0.748	0.124	8.96363e-133
RPL8	Epithelial_cells	8.49712e-137	-0.560118	1	0.989	1.2094e-132
MEDAG	Epithelial_cells	7.42284e-136	0.620968	0.502	0.035	1.05649e-131
IGFBP6	Epithelial_cells	8.00516e-136	1.18788	0.84	0.206	1.13937e-131
AKR1C2	Epithelial_cells	8.17754e-136	0.893729	0.403	0.01	1.16391e-131
PLAU	Epithelial_cells	8.31248e-136	1.39762	0.908	0.372	1.18312e-131
CD70	Epithelial_cells	1.12668e-135	0.848257	0.567	0.06	1.6036e-131
FUCA1	Epithelial_cells	2.07528e-135	0.769892	0.823	0.159	2.95375e-131
PPL	Epithelial_cells	3.55128e-135	0.60466	0.435	0.017	5.05453e-131
RPLP1	Epithelial_cells	3.99759e-135	-0.515791	1	0.998	5.68978e-131
PVRL1	Epithelial_cells	1.77772e-134	0.593536	0.447	0.021	2.53023e-130
EGFR	Epithelial_cells	3.90035e-134	0.651825	0.538	0.048	5.55137e-130
KRT16	Epithelial_cells	5.04864e-134	0.772926	0.389	0.007	7.18573e-130
CA12	Epithelial_cells	2.54646e-133	0.828176	0.406	0.012	3.62438e-129
FAT1	Epithelial_cells	2.72983e-133	0.635154	0.595	0.066	3.88537e-129
HOMER2	Epithelial_cells	2.99356e-133	0.521176	0.429	0.017	4.26074e-129
STON2	Epithelial_cells	3.53357e-133	0.542971	0.389	0.008	5.02933e-129
FHOD3	Epithelial_cells	4.25217e-133	0.548738	0.431	0.018	6.05212e-129
KDELR3	Epithelial_cells	6.0729e-133	1.03031	0.748	0.144	8.64356e-129
RPL26	Epithelial_cells	6.89604e-133	-0.629169	1	0.99	9.81514e-129
TMEM189	Epithelial_cells	1.56619e-132	0.753972	0.794	0.155	2.22916e-128
DTD1	Epithelial_cells	1.68224e-132	0.929114	0.844	0.204	2.39433e-128
DRAXIN	Epithelial_cells	2.12701e-132	0.55261	0.374	0.005	3.02737e-128
CST1	Epithelial_cells	3.56819e-132	1.14631	0.498	0.04	5.0786e-128
RPS29	Epithelial_cells	4.19776e-132	-0.782255	0.994	0.98	5.97467e-128
ZNF185	Epithelial_cells	5.55637e-132	0.550913	0.418	0.015	7.90838e-128
PDGFC	Epithelial_cells	1.32274e-131	0.842272	0.687	0.109	1.88266e-127
FAU	Epithelial_cells	1.80526e-131	-0.596843	1	0.985	2.56942e-127
RAET1G	Epithelial_cells	2.42457e-131	0.541078	0.397	0.01	3.45089e-127
RPS12	Epithelial_cells	3.62308e-131	-0.603546	1	0.992	5.15674e-127
KRT6A	Epithelial_cells	6.6657e-131	1.27156	0.45	0.028	9.4873e-127
ARHGAP22	Epithelial_cells	1.06477e-130	0.630077	0.51	0.043	1.51549e-126
ITGB5	Epithelial_cells	1.18885e-130	0.83131	0.731	0.128	1.69209e-126
RPL10A	Epithelial_cells	2.23223e-130	-0.626902	1	0.981	3.17714e-126
RP11-60L3.1	Epithelial_cells	2.72382e-130	0.536568	0.363	0.003	3.87681e-126
MTHFS	Epithelial_cells	5.73079e-130	0.615601	0.698	0.109	8.15664e-126
RPL23A	Epithelial_cells	6.3314e-130	-0.619244	1	0.993	9.01149e-126
DSC2	Epithelial_cells	9.51223e-130	0.709473	0.54	0.054	1.35388e-125
PAWR	Epithelial_cells	1.50674e-129	0.6651	0.677	0.099	2.14454e-125
MAPKAPK3	Epithelial_cells	1.98235e-129	0.708651	0.733	0.125	2.82147e-125
HLA-E	Epithelial_cells	2.6462e-129	-1.33395	0.941	0.905	3.76633e-125
HOXB3	Epithelial_cells	7.18929e-129	0.541393	0.485	0.035	1.02325e-124
RPS8	Epithelial_cells	1.04328e-128	-0.604094	1	0.989	1.4849e-124
RNF126	Epithelial_cells	1.04733e-128	0.727706	0.838	0.185	1.49067e-124
RPL41	Epithelial_cells	1.08688e-128	-0.548307	1	0.998	1.54695e-124
TM7SF3	Epithelial_cells	3.59407e-128	0.808764	0.802	0.169	5.11543e-124
ARHGEF35	Epithelial_cells	3.71004e-128	0.510014	0.424	0.019	5.2805e-124
HMGB3	Epithelial_cells	3.86475e-128	0.746583	0.637	0.092	5.5007e-124
NPTN	Epithelial_cells	3.89714e-128	0.64648	0.647	0.09	5.54679e-124
TMEM117	Epithelial_cells	6.03372e-128	0.657348	0.41	0.017	8.58779e-124
MTSS1	Epithelial_cells	2.13549e-127	0.540708	0.531	0.05	3.03944e-123
F3	Epithelial_cells	3.05112e-127	0.810976	0.54	0.057	4.34266e-123
CST6	Epithelial_cells	4.56134e-127	0.828712	0.412	0.018	6.49216e-123
TMX4	Epithelial_cells	5.07365e-127	0.967918	0.872	0.232	7.22132e-123
YTHDF1	Epithelial_cells	5.173e-127	0.522749	0.536	0.052	7.36273e-123
DNTTIP1	Epithelial_cells	1.12113e-126	0.897421	0.807	0.188	1.5957e-122
WDR34	Epithelial_cells	1.1429e-126	0.742642	0.731	0.13	1.6267e-122
PRKCA	Epithelial_cells	1.55543e-126	0.598178	0.632	0.087	2.21385e-122
RPL31	Epithelial_cells	1.83866e-126	-0.684136	1	0.983	2.61696e-122
P4HA2	Epithelial_cells	1.9154e-126	0.830325	0.782	0.158	2.72619e-122
PRSS3	Epithelial_cells	3.1887e-126	0.527202	0.359	0.005	4.53848e-122
TNKS1BP1	Epithelial_cells	4.1453e-126	0.635986	0.62	0.083	5.9e-122
SRPX	Epithelial_cells	5.86145e-126	1.07979	0.761	0.162	8.3426e-122
RPL18A	Epithelial_cells	6.18988e-126	-0.562564	1	0.994	8.81006e-122
FAH	Epithelial_cells	8.80673e-126	0.567663	0.55	0.058	1.25346e-121
ADAM8	Epithelial_cells	1.05801e-125	0.761053	0.695	0.112	1.50586e-121
COL12A1	Epithelial_cells	1.6703e-125	1.08774	0.739	0.149	2.37733e-121
APEH	Epithelial_cells	8.31656e-125	0.61721	0.687	0.112	1.1837e-120
TBC1D2	Epithelial_cells	1.36223e-124	0.630018	0.569	0.068	1.93887e-120
WEE1	Epithelial_cells	1.43648e-124	0.569188	0.54	0.056	2.04455e-120
RPS3	Epithelial_cells	1.61185e-124	-0.576281	1	0.994	2.29415e-120
SRGAP1	Epithelial_cells	1.68953e-124	0.650245	0.639	0.093	2.40471e-120
CHPF	Epithelial_cells	1.75634e-124	0.759159	0.763	0.138	2.49979e-120
RAB22A	Epithelial_cells	1.79439e-124	0.661416	0.71	0.122	2.55396e-120
IFT22	Epithelial_cells	3.36056e-124	0.717834	0.75	0.139	4.78308e-120
HOMER3	Epithelial_cells	5.85347e-124	0.682263	0.634	0.093	8.33124e-120
GIPC1	Epithelial_cells	8.49476e-124	0.841653	0.834	0.197	1.20906e-119
POMGNT1	Epithelial_cells	1.05526e-123	0.598243	0.664	0.101	1.50195e-119
SCNN1A	Epithelial_cells	2.93642e-123	0.50822	0.357	0.006	4.17941e-119
STK24	Epithelial_cells	3.94183e-123	0.53322	0.693	0.108	5.61041e-119
ETHE1	Epithelial_cells	1.04119e-122	0.997948	0.931	0.323	1.48193e-118
GAS2L1	Epithelial_cells	1.08367e-122	0.804409	0.685	0.123	1.54238e-118
SNCG	Epithelial_cells	1.34739e-122	0.985833	0.87	0.197	1.91775e-118
NETO2	Epithelial_cells	1.93141e-122	0.542173	0.466	0.035	2.74898e-118
LRWD1	Epithelial_cells	2.0047e-122	0.565901	0.555	0.064	2.8533e-118
CPOX	Epithelial_cells	4.02527e-122	0.556666	0.475	0.039	5.72916e-118
HSPA1A	Epithelial_cells	6.98389e-122	-1.14425	0.952	0.925	9.94016e-118
CLCA2	Epithelial_cells	9.78805e-122	0.700061	0.336	0.002	1.39313e-117
SPRY2	Epithelial_cells	2.11175e-121	0.505948	0.468	0.036	3.00565e-117
RPS11	Epithelial_cells	3.7627e-121	-0.575994	0.992	0.974	5.35545e-117
FN1	Epithelial_cells	7.79685e-121	1.09953	0.956	0.632	1.10973e-116
DCBLD1	Epithelial_cells	1.36343e-120	0.80933	0.664	0.115	1.94058e-116
PPP1R14B	Epithelial_cells	1.79293e-120	0.832154	0.828	0.21	2.55188e-116
ADAM19	Epithelial_cells	1.88044e-120	0.705825	0.613	0.091	2.67643e-116
C12orf75	Epithelial_cells	1.9521e-120	1.06949	0.855	0.23	2.77842e-116
FTH1	Epithelial_cells	1.9691e-120	-0.605341	1	0.987	2.80262e-116
TLDC1	Epithelial_cells	2.02592e-120	0.537604	0.527	0.056	2.8835e-116
CCNA1	Epithelial_cells	3.50042e-120	0.641939	0.334	0.003	4.98215e-116
PLOD1	Epithelial_cells	6.68081e-120	1.00006	0.792	0.206	9.5088e-116
DMKN	Epithelial_cells	1.87991e-119	0.726312	0.45	0.035	2.67568e-115
SMIM4	Epithelial_cells	2.22255e-119	0.740254	0.721	0.141	3.16336e-115
RPL32	Epithelial_cells	2.2668e-119	-0.549703	1	0.994	3.22634e-115
BPGM	Epithelial_cells	2.38396e-119	0.651982	0.739	0.141	3.39308e-115
MTURN	Epithelial_cells	4.66219e-119	0.544588	0.439	0.03	6.6357e-115
UBB	Epithelial_cells	1.82122e-118	-0.59927	1	0.972	2.59215e-114
SLC31A2	Epithelial_cells	3.22456e-118	0.785981	0.723	0.146	4.58952e-114
CD276	Epithelial_cells	4.1646e-118	0.867168	0.8	0.185	5.92747e-114
LYPLA2	Epithelial_cells	1.02277e-117	0.750687	0.842	0.202	1.45571e-113
RPS16	Epithelial_cells	1.37293e-117	-0.534924	1	0.985	1.95408e-113
BHLHE41	Epithelial_cells	1.38157e-117	0.797607	0.641	0.11	1.96639e-113
MANBAL	Epithelial_cells	1.45742e-117	0.754231	0.828	0.185	2.07435e-113
UHRF2	Epithelial_cells	1.62266e-117	0.547111	0.609	0.086	2.30954e-113
FEZ1	Epithelial_cells	1.71403e-117	0.700975	0.655	0.11	2.43958e-113
MT-CO3	Epithelial_cells	2.02723e-117	-0.555103	0.958	0.981	2.88536e-113
WNT9A	Epithelial_cells	2.19592e-117	0.511692	0.324	0.002	3.12545e-113
PRKCI	Epithelial_cells	4.02738e-117	0.545993	0.578	0.076	5.73218e-113
SLC35B2	Epithelial_cells	4.60106e-117	0.739659	0.796	0.175	6.54868e-113
MT1X	Epithelial_cells	9.56216e-117	1.23996	0.849	0.277	1.36098e-112
ALCAM	Epithelial_cells	9.6115e-117	0.720009	0.731	0.135	1.36801e-112
SMYD2	Epithelial_cells	1.54527e-116	0.542891	0.63	0.096	2.19938e-112
DUSP7	Epithelial_cells	3.24646e-116	0.513476	0.435	0.031	4.62068e-112
AP1S1	Epithelial_cells	3.58157e-116	0.870784	0.893	0.268	5.09764e-112
DST	Epithelial_cells	6.25648e-116	0.921675	0.876	0.239	8.90484e-112
FSTL3	Epithelial_cells	9.40777e-116	0.932466	0.55	0.077	1.33901e-111
HN1L	Epithelial_cells	9.7305e-116	0.564716	0.586	0.081	1.38494e-111
ID1	Epithelial_cells	1.02707e-115	1.13943	0.983	0.364	1.46182e-111
MGAT4B	Epithelial_cells	1.1928e-115	0.505172	0.538	0.063	1.69771e-111
HGS	Epithelial_cells	1.19676e-115	0.557437	0.643	0.103	1.70335e-111
ANKRD65	Epithelial_cells	1.77658e-115	0.592224	0.597	0.085	2.52861e-111
UBA1	Epithelial_cells	2.12289e-115	0.739107	0.777	0.174	3.02152e-111
MALSU1	Epithelial_cells	2.47805e-115	0.720199	0.826	0.194	3.52701e-111
BCL2L1	Epithelial_cells	3.15584e-115	0.651193	0.729	0.139	4.4917e-111
COQ4	Epithelial_cells	3.31358e-115	0.683056	0.821	0.187	4.71622e-111
PLEKHA5	Epithelial_cells	4.24485e-115	0.580299	0.683	0.117	6.0417e-111
UBC	Epithelial_cells	5.02875e-115	-0.638662	0.994	0.976	7.15742e-111
NEDD4L	Epithelial_cells	1.29033e-114	0.52632	0.391	0.019	1.83653e-110
RPS19	Epithelial_cells	2.23047e-114	-0.518458	1	0.997	3.17462e-110
RPS4X	Epithelial_cells	2.24322e-114	-0.545841	1	0.992	3.19278e-110
CDK5	Epithelial_cells	2.32484e-114	0.579252	0.578	0.081	3.30894e-110
WNT5A	Epithelial_cells	3.61107e-114	0.696031	0.578	0.083	5.13963e-110
IMPDH1	Epithelial_cells	5.24211e-114	0.671949	0.691	0.13	7.46109e-110
ANTXR2	Epithelial_cells	6.18212e-114	0.780989	0.719	0.149	8.799e-110
JAG1	Epithelial_cells	9.72722e-114	0.842412	0.792	0.185	1.38447e-109
GNB2L1	Epithelial_cells	1.22958e-113	-0.523263	1	0.976	1.75007e-109
LINC01503	Epithelial_cells	2.60694e-113	0.653791	0.534	0.067	3.71046e-109
PAK4	Epithelial_cells	2.69727e-113	0.513797	0.534	0.064	3.83902e-109
DUSP1	Epithelial_cells	2.7897e-113	-1.40385	0.845	0.89	3.97059e-109
MYO6	Epithelial_cells	5.12342e-113	0.66714	0.756	0.153	7.29217e-109
NT5DC2	Epithelial_cells	5.91075e-113	0.705743	0.649	0.112	8.41277e-109
DNAJB2	Epithelial_cells	6.20779e-113	0.578233	0.742	0.145	8.83555e-109
HOOK2	Epithelial_cells	6.51952e-113	0.563384	0.691	0.126	9.27923e-109
TMPRSS4	Epithelial_cells	8.88863e-113	0.591627	0.313	0.002	1.26512e-108
GALNT10	Epithelial_cells	9.45825e-113	0.557673	0.555	0.074	1.34619e-108
DDB2	Epithelial_cells	1.29812e-112	0.633889	0.685	0.126	1.84762e-108
APOO	Epithelial_cells	2.28823e-112	0.514722	0.571	0.079	3.25683e-108
ACOT8	Epithelial_cells	2.55684e-112	0.590294	0.645	0.108	3.63915e-108
ASL	Epithelial_cells	4.25492e-112	0.683041	0.748	0.158	6.05603e-108
PSMG4	Epithelial_cells	5.19932e-112	0.606007	0.725	0.136	7.40019e-108
SLC2A4RG	Epithelial_cells	5.98915e-112	0.575483	0.595	0.091	8.52436e-108
DALRD3	Epithelial_cells	7.7414e-112	0.58271	0.712	0.137	1.10183e-107
CTNNBIP1	Epithelial_cells	9.41828e-112	0.737542	0.756	0.17	1.3405e-107
SAA1	Epithelial_cells	9.57254e-112	0.818755	0.399	0.025	1.36246e-107
EYA2	Epithelial_cells	1.08585e-111	0.50455	0.427	0.032	1.5455e-107
HCCS	Epithelial_cells	1.85544e-111	0.540128	0.639	0.105	2.64084e-107
RPL39	Epithelial_cells	2.22232e-111	-0.595558	0.996	0.986	3.16302e-107
DDX5	Epithelial_cells	2.23414e-111	-0.752168	0.99	0.939	3.17985e-107
FGF1	Epithelial_cells	2.3969e-111	0.53296	0.422	0.031	3.41151e-107
WSB2	Epithelial_cells	3.68888e-111	0.575983	0.611	0.095	5.25038e-107
SMS	Epithelial_cells	6.21816e-111	0.841454	0.893	0.257	8.85031e-107
SSH3	Epithelial_cells	7.62647e-111	0.548847	0.485	0.051	1.08547e-106
ZDHHC12	Epithelial_cells	7.91565e-111	0.751546	0.845	0.209	1.12664e-106
ANO1	Epithelial_cells	8.10451e-111	0.583005	0.519	0.063	1.15352e-106
PTGFRN	Epithelial_cells	1.18788e-110	0.594162	0.576	0.084	1.69071e-106
POLM	Epithelial_cells	2.07457e-110	0.561033	0.55	0.074	2.95274e-106
TNFRSF21	Epithelial_cells	2.08366e-110	0.649684	0.552	0.075	2.96568e-106
PRNP	Epithelial_cells	3.2861e-110	0.975495	0.905	0.346	4.6771e-106
PFDN5	Epithelial_cells	6.01978e-110	-0.606682	0.992	0.943	8.56796e-106
CXADR	Epithelial_cells	7.84306e-110	0.854642	0.326	0.007	1.1163e-105
PDGFA	Epithelial_cells	9.00474e-110	0.513571	0.523	0.063	1.28164e-105
HSP90AA1	Epithelial_cells	2.18179e-109	-0.762218	1	0.977	3.10534e-105
ADK	Epithelial_cells	2.32908e-109	0.535799	0.66	0.115	3.31498e-105
COL8A1	Epithelial_cells	2.55001e-109	0.874194	0.706	0.138	3.62943e-105
TP53I3	Epithelial_cells	3.32453e-109	0.745929	0.773	0.177	4.7318e-105
AKR1C3	Epithelial_cells	3.41304e-109	0.786562	0.693	0.137	4.85778e-105
RAMP1	Epithelial_cells	4.08851e-109	0.658218	0.691	0.129	5.81917e-105
GSS	Epithelial_cells	4.82668e-109	0.601579	0.739	0.156	6.86981e-105
PXN	Epithelial_cells	1.05365e-108	0.592262	0.662	0.115	1.49967e-104
CTSV	Epithelial_cells	3.55379e-108	0.571484	0.353	0.015	5.05811e-104
CKAP4	Epithelial_cells	3.63323e-108	0.83634	0.828	0.201	5.17118e-104
FOXC1	Epithelial_cells	3.78383e-108	0.525386	0.571	0.081	5.38553e-104
ARFGAP1	Epithelial_cells	4.57308e-108	0.560094	0.63	0.108	6.50887e-104
RPS28	Epithelial_cells	5.15395e-108	-0.559908	1	0.985	7.33561e-104
PON2	Epithelial_cells	6.67541e-108	0.888427	0.893	0.269	9.50111e-104
PLOD2	Epithelial_cells	1.18237e-107	0.757855	0.683	0.135	1.68286e-103
UBE2M	Epithelial_cells	2.40575e-107	0.614469	0.674	0.128	3.4241e-103
IP6K2	Epithelial_cells	4.30978e-107	0.77696	0.885	0.253	6.13411e-103
LDOC1	Epithelial_cells	6.21523e-107	0.559691	0.63	0.106	8.84614e-103
CROT	Epithelial_cells	7.14096e-107	0.587048	0.479	0.054	1.01637e-102
RPL37	Epithelial_cells	7.5102e-107	-0.604886	1	0.965	1.06893e-102
IRS1	Epithelial_cells	1.7902e-106	0.542234	0.49	0.057	2.548e-102
PLP2	Epithelial_cells	2.38418e-106	0.925653	0.985	0.502	3.3934e-102
SMUG1	Epithelial_cells	3.05809e-106	0.609647	0.7	0.14	4.35258e-102
FLNB	Epithelial_cells	3.27493e-106	0.586671	0.67	0.123	4.6612e-102
UBE2E3	Epithelial_cells	5.32753e-106	0.849785	0.927	0.326	7.58267e-102
RAB38	Epithelial_cells	1.30796e-105	0.521408	0.448	0.044	1.86162e-101
COPS7A	Epithelial_cells	1.35379e-105	0.650511	0.786	0.181	1.92686e-101
MALL	Epithelial_cells	2.22165e-105	0.669971	0.721	0.146	3.16207e-101
SLC29A1	Epithelial_cells	8.84638e-105	0.875473	0.691	0.15	1.2591e-100
TINAGL1	Epithelial_cells	1.6387e-104	1.02152	0.924	0.291	2.33236e-100
CMTM7	Epithelial_cells	3.23279e-104	0.676665	0.834	0.216	4.60123e-100
PGM1	Epithelial_cells	3.23353e-104	0.634969	0.718	0.152	4.60228e-100
CAV2	Epithelial_cells	3.29359e-104	0.915086	0.876	0.259	4.68777e-100
APOBEC3G	Epithelial_cells	1.25994e-103	0.572911	0.811	0.199	1.79328e-99
TMEM132A	Epithelial_cells	1.33639e-103	0.567898	0.412	0.035	1.90208e-99
JUNB	Epithelial_cells	1.50737e-103	-1.12125	0.954	0.917	2.14545e-99
AMIGO2	Epithelial_cells	1.61939e-103	0.625337	0.519	0.072	2.30487e-99
RPL5	Epithelial_cells	6.01004e-103	-0.548899	0.998	0.968	8.55408e-99
ERRFI1	Epithelial_cells	9.26442e-103	0.540299	0.649	0.117	1.31861e-98
FNDC4	Epithelial_cells	1.39676e-102	0.583671	0.569	0.09	1.98801e-98
PMM1	Epithelial_cells	7.55862e-102	0.541558	0.704	0.147	1.07582e-97
PTPN14	Epithelial_cells	8.23957e-102	0.512731	0.557	0.084	1.17274e-97
PFKP	Epithelial_cells	8.99586e-102	0.562019	0.714	0.148	1.28038e-97
SLC16A3	Epithelial_cells	1.01825e-101	1.02093	0.874	0.324	1.44927e-97
BCAT2	Epithelial_cells	1.86471e-101	0.516701	0.597	0.1	2.65405e-97
PSMD2	Epithelial_cells	2.31953e-101	0.906402	0.908	0.365	3.30139e-97
SPECC1	Epithelial_cells	3.01816e-101	0.545358	0.626	0.115	4.29575e-97
TPBG	Epithelial_cells	7.21382e-101	0.658241	0.8	0.187	1.02674e-96
EEF1D	Epithelial_cells	7.96779e-101	-0.588881	0.996	0.943	1.13406e-96
WDR18	Epithelial_cells	9.83473e-101	0.559259	0.712	0.151	1.39978e-96
RPS7	Epithelial_cells	1.82291e-100	-0.534559	0.998	0.981	2.59455e-96
PLEC	Epithelial_cells	2.5505e-100	0.792905	0.83	0.244	3.63012e-96
SUGCT	Epithelial_cells	3.33251e-100	0.617601	0.555	0.087	4.74316e-96
SLC1A5	Epithelial_cells	4.20858e-100	0.597091	0.748	0.173	5.99007e-96
NREP	Epithelial_cells	8.21815e-100	0.756512	0.725	0.161	1.16969e-95
PRSS22	Epithelial_cells	1.29183e-99	0.58159	0.288	0.004	1.83866e-95
SNHG18	Epithelial_cells	1.60238e-99	0.519053	0.527	0.077	2.28067e-95
FABP5	Epithelial_cells	2.1775e-99	1.02683	0.947	0.424	3.09923e-95
SMAGP	Epithelial_cells	4.86422e-99	0.577292	0.737	0.161	6.92324e-95
MRPS26	Epithelial_cells	5.49083e-99	0.712517	0.901	0.268	7.8151e-95
TES	Epithelial_cells	1.2776e-98	0.573649	0.744	0.17	1.81841e-94
NET1	Epithelial_cells	1.43729e-98	0.637537	0.84	0.212	2.0457e-94
CRLS1	Epithelial_cells	2.25451e-98	0.652837	0.775	0.194	3.20885e-94
SNAI2	Epithelial_cells	3.37683e-98	0.606423	0.664	0.13	4.80624e-94
TMCO3	Epithelial_cells	3.96311e-98	0.504247	0.666	0.132	5.64069e-94
HSBP1L1	Epithelial_cells	4.30453e-98	0.523617	0.578	0.097	6.12663e-94
TRIOBP	Epithelial_cells	5.67184e-98	0.51715	0.624	0.114	8.07274e-94
FOS	Epithelial_cells	6.97315e-98	-1.34589	0.821	0.869	9.92488e-94
ACTL6A	Epithelial_cells	1.42894e-97	0.605046	0.735	0.174	2.03381e-93
RIC8A	Epithelial_cells	2.86089e-97	0.681479	0.809	0.225	4.0719e-93
SMIM22	Epithelial_cells	3.61327e-97	0.745669	0.284	0.005	5.14277e-93
RUNX2	Epithelial_cells	5.39107e-97	0.598849	0.557	0.095	7.67311e-93
YIPF2	Epithelial_cells	2.11008e-96	0.690396	0.817	0.228	3.00328e-92
DDA1	Epithelial_cells	3.48748e-96	0.542145	0.758	0.179	4.96373e-92
CAPN1	Epithelial_cells	5.18033e-96	0.753129	0.895	0.282	7.37316e-92
ARPC1A	Epithelial_cells	6.14804e-96	0.798363	0.948	0.348	8.7505e-92
MBOAT7	Epithelial_cells	6.64449e-96	0.544323	0.742	0.172	9.45711e-92
GALNT2	Epithelial_cells	1.00275e-95	0.539015	0.607	0.116	1.42721e-91
VEGFA	Epithelial_cells	1.38486e-95	0.564675	0.508	0.074	1.97107e-91
MMP10	Epithelial_cells	3.84456e-95	0.741641	0.298	0.009	5.47197e-91
PGM3	Epithelial_cells	4.05703e-95	0.530198	0.616	0.12	5.77436e-91
ARL4C	Epithelial_cells	4.78143e-95	0.708993	0.803	0.231	6.80541e-91
LTBR	Epithelial_cells	6.53424e-95	0.649319	0.824	0.222	9.30018e-91
TK1	Epithelial_cells	6.6259e-95	0.864848	0.431	0.052	9.43064e-91
ANKLE2	Epithelial_cells	7.22361e-95	0.545797	0.729	0.173	1.02814e-90
NIT2	Epithelial_cells	1.11764e-94	0.565293	0.798	0.2	1.59073e-90
UBE2T	Epithelial_cells	1.23043e-94	0.71632	0.456	0.061	1.75127e-90
RPL35A	Epithelial_cells	1.65235e-94	-0.516666	1	0.994	2.3518e-90
IFRD2	Epithelial_cells	1.77344e-94	0.566343	0.687	0.151	2.52414e-90
CSE1L	Epithelial_cells	3.52353e-94	0.599064	0.613	0.122	5.01504e-90
MDFI	Epithelial_cells	5.80883e-94	0.542192	0.708	0.153	8.2677e-90
SLC35C2	Epithelial_cells	8.91282e-94	0.506653	0.725	0.167	1.26856e-89
SORD	Epithelial_cells	9.95446e-94	0.501349	0.46	0.059	1.41682e-89
EEF1E1	Epithelial_cells	1.69144e-93	0.605744	0.779	0.197	2.40743e-89
AGTRAP	Epithelial_cells	1.78579e-93	0.739341	0.872	0.279	2.54172e-89
ADSS	Epithelial_cells	2.41336e-93	0.529228	0.805	0.203	3.43493e-89
MZT1	Epithelial_cells	6.50345e-93	0.504339	0.647	0.134	9.25635e-89
TP53TG1	Epithelial_cells	1.07483e-92	0.534639	0.698	0.158	1.5298e-88
CAPN2	Epithelial_cells	1.34211e-92	0.791003	0.929	0.351	1.91022e-88
ROGDI	Epithelial_cells	1.61298e-92	0.511528	0.616	0.12	2.29575e-88
RP11-95P13.1	Epithelial_cells	1.99575e-92	0.569184	0.263	0.003	2.84055e-88
UBE2C	Epithelial_cells	2.15824e-92	1.11502	0.433	0.057	3.07182e-88
POP7	Epithelial_cells	3.7136e-92	0.543033	0.775	0.193	5.28557e-88
ITGAV	Epithelial_cells	9.07237e-92	0.627556	0.763	0.191	1.29127e-87
TRIP6	Epithelial_cells	1.49099e-91	0.655211	0.861	0.248	2.12212e-87
TIMM17B	Epithelial_cells	1.58681e-91	0.545762	0.823	0.221	2.2585e-87
MPZL2	Epithelial_cells	2.24875e-91	0.62402	0.639	0.131	3.20065e-87
IGF2	Epithelial_cells	3.05275e-91	0.758375	0.607	0.124	4.34497e-87
RNASEH2A	Epithelial_cells	3.68135e-91	0.546383	0.538	0.093	5.23967e-87
RPL23	Epithelial_cells	4.23466e-91	-0.521445	0.998	0.957	6.02719e-87
ICMT	Epithelial_cells	4.6077e-91	0.584129	0.624	0.13	6.55814e-87
RIN2	Epithelial_cells	1.49111e-90	0.570732	0.635	0.135	2.1223e-86
MXRA5	Epithelial_cells	2.62244e-90	0.554406	0.553	0.098	3.73252e-86
C16orf74	Epithelial_cells	2.7558e-90	0.519205	0.324	0.019	3.92233e-86
FASTK	Epithelial_cells	4.50583e-90	0.5668	0.761	0.194	6.41315e-86
CTHRC1	Epithelial_cells	5.34057e-90	1.06942	0.855	0.321	7.60123e-86
PKM	Epithelial_cells	1.04544e-89	0.624148	0.998	0.718	1.48797e-85
TRIM47	Epithelial_cells	1.30069e-89	0.573922	0.727	0.171	1.85127e-85
ALG3	Epithelial_cells	1.46734e-89	0.600462	0.771	0.204	2.08846e-85
DPM2	Epithelial_cells	1.57224e-89	0.612444	0.824	0.231	2.23776e-85
CLSTN1	Epithelial_cells	2.18365e-89	0.593256	0.748	0.193	3.10799e-85
CTNNAL1	Epithelial_cells	2.80051e-89	0.580288	0.708	0.17	3.98597e-85
JUN	Epithelial_cells	3.84033e-89	-1.08182	0.926	0.886	5.46595e-85
AREG	Epithelial_cells	4.0885e-89	0.502829	0.733	0.171	5.81916e-85
HSPB11	Epithelial_cells	4.78476e-89	0.636051	0.87	0.273	6.81015e-85
RPL14	Epithelial_cells	7.27848e-89	-0.50991	1	0.981	1.03595e-84
PCNA	Epithelial_cells	1.96166e-88	0.730008	0.826	0.248	2.79203e-84
EDNRA	Epithelial_cells	2.2204e-88	0.540909	0.634	0.131	3.16029e-84
CD46	Epithelial_cells	3.32929e-88	0.597714	0.903	0.265	4.73858e-84
ST5	Epithelial_cells	3.58389e-88	0.50675	0.613	0.123	5.10095e-84
TUBA1C	Epithelial_cells	6.7477e-88	0.862874	0.927	0.36	9.604e-84
CXXC5	Epithelial_cells	1.14979e-87	0.539846	0.622	0.13	1.6365e-83
LAMB1	Epithelial_cells	1.76792e-87	0.67057	0.756	0.2	2.51628e-83
TSTA3	Epithelial_cells	2.39906e-87	0.610423	0.811	0.233	3.41458e-83
GJB2	Epithelial_cells	4.32042e-87	0.510096	0.605	0.119	6.14926e-83
ASPH	Epithelial_cells	7.65435e-87	0.767928	0.931	0.349	1.08944e-82
MMP1	Epithelial_cells	1.26401e-86	1.01826	0.305	0.018	1.79907e-82
RPA3	Epithelial_cells	1.53301e-86	0.616473	0.813	0.244	2.18193e-82
MAP2K2	Epithelial_cells	2.50533e-86	0.535691	0.723	0.181	3.56584e-82
CKS1B	Epithelial_cells	3.7026e-86	0.771023	0.733	0.208	5.26991e-82
NSFL1C	Epithelial_cells	4.57267e-86	0.613702	0.844	0.253	6.50828e-82
FLRT3	Epithelial_cells	6.79393e-86	0.604137	0.252	0.004	9.6698e-82
ARMC10	Epithelial_cells	1.48672e-85	0.546354	0.758	0.204	2.11604e-81
GDF15	Epithelial_cells	1.88205e-85	0.925806	0.389	0.046	2.67872e-81
SEC61A1	Epithelial_cells	3.31874e-85	0.674982	0.842	0.26	4.72356e-81
SH3PXD2A	Epithelial_cells	4.39516e-85	0.548425	0.611	0.13	6.25563e-81
PFDN4	Epithelial_cells	5.35131e-85	0.646176	0.893	0.298	7.61651e-81
GMNN	Epithelial_cells	7.86897e-85	0.564672	0.51	0.09	1.11999e-80
CCNB1	Epithelial_cells	7.87379e-85	0.780465	0.349	0.033	1.12068e-80
IVNS1ABP	Epithelial_cells	9.66264e-85	0.6022	0.826	0.247	1.37528e-80
MMP14	Epithelial_cells	1.30713e-84	0.800912	0.845	0.273	1.86043e-80
RPL22	Epithelial_cells	1.31577e-84	-0.50332	0.994	0.939	1.87273e-80
DCTD	Epithelial_cells	1.33107e-84	0.545684	0.796	0.214	1.89451e-80
MFGE8	Epithelial_cells	3.43462e-84	0.976473	0.859	0.369	4.8885e-80
SCCPDH	Epithelial_cells	4.75242e-84	0.650238	0.773	0.211	6.76412e-80
TMEM30A	Epithelial_cells	1.14386e-83	0.615555	0.823	0.246	1.62806e-79
CENPW	Epithelial_cells	2.0135e-83	0.846763	0.492	0.095	2.86581e-79
CARD19	Epithelial_cells	5.9922e-83	0.647547	0.863	0.293	8.5287e-79
SLC25A39	Epithelial_cells	7.7617e-83	0.618363	0.876	0.285	1.10472e-78
OSTM1	Epithelial_cells	1.02435e-82	0.509508	0.695	0.172	1.45796e-78
TPST1	Epithelial_cells	1.05684e-82	0.550141	0.683	0.164	1.5042e-78
GOLT1B	Epithelial_cells	1.23409e-82	0.54921	0.729	0.193	1.75648e-78
RUVBL2	Epithelial_cells	1.54536e-82	0.585828	0.752	0.211	2.1995e-78
YIPF5	Epithelial_cells	1.87758e-82	0.691297	0.834	0.272	2.67236e-78
SH3KBP1	Epithelial_cells	2.00445e-82	0.682181	0.826	0.287	2.85294e-78
MRPL17	Epithelial_cells	2.08877e-82	0.583261	0.824	0.242	2.97294e-78
TSPAN6	Epithelial_cells	3.14086e-82	0.530108	0.586	0.123	4.47039e-78
DTYMK	Epithelial_cells	8.03045e-82	0.625931	0.7	0.189	1.14297e-77
PPFIBP1	Epithelial_cells	1.04345e-81	0.77489	0.838	0.276	1.48515e-77
PLIN3	Epithelial_cells	1.19845e-81	0.723962	0.897	0.317	1.70575e-77
GGH	Epithelial_cells	1.54165e-81	0.563043	0.49	0.087	2.19423e-77
MRPS23	Epithelial_cells	1.8696e-81	0.572154	0.8	0.233	2.66099e-77
MAD2L2	Epithelial_cells	1.9271e-81	0.600981	0.786	0.233	2.74284e-77
PLOD3	Epithelial_cells	2.19622e-81	0.588534	0.744	0.205	3.12588e-77
RHOBTB3	Epithelial_cells	3.45402e-81	0.517031	0.698	0.169	4.91611e-77
MT2A	Epithelial_cells	4.04158e-81	0.794977	0.96	0.76	5.75238e-77
MT-ND2	Epithelial_cells	4.13987e-81	-0.506497	0.952	0.975	5.89227e-77
PDXK	Epithelial_cells	9.15511e-81	0.5646	0.737	0.204	1.30305e-76
EMC6	Epithelial_cells	1.02177e-80	0.52414	0.861	0.271	1.45429e-76
PSMD14	Epithelial_cells	1.08007e-80	0.619753	0.861	0.284	1.53726e-76
ORMDL2	Epithelial_cells	1.24893e-80	0.650636	0.889	0.294	1.7776e-76
BIRC5	Epithelial_cells	1.26621e-80	0.799758	0.317	0.026	1.8022e-76
AXL	Epithelial_cells	1.4178e-80	0.710739	0.786	0.241	2.01795e-76
INHBA	Epithelial_cells	1.68435e-80	0.625819	0.714	0.176	2.39733e-76
RRAS	Epithelial_cells	1.72786e-80	0.527932	0.651	0.155	2.45927e-76
IKBIP	Epithelial_cells	1.78487e-80	0.730309	0.823	0.276	2.54041e-76
MAGOHB	Epithelial_cells	3.77384e-80	0.51102	0.702	0.181	5.3713e-76
ITPA	Epithelial_cells	3.77408e-80	0.613112	0.893	0.311	5.37165e-76
AGPAT2	Epithelial_cells	6.35113e-80	0.625111	0.878	0.279	9.03956e-76
TPD52L2	Epithelial_cells	8.39938e-80	0.590838	0.83	0.259	1.19548e-75
APMAP	Epithelial_cells	1.23866e-79	0.623434	0.893	0.322	1.76299e-75
F5	Epithelial_cells	1.42522e-79	0.508929	0.281	0.015	2.02852e-75
DHRS3	Epithelial_cells	2.24137e-79	0.580109	0.716	0.191	3.19015e-75
NAP1L4	Epithelial_cells	3.00263e-79	0.501628	0.876	0.27	4.27364e-75
MXRA8	Epithelial_cells	4.43801e-79	0.808094	0.786	0.221	6.31662e-75
TGFBI	Epithelial_cells	4.69486e-79	0.935662	0.88	0.431	6.6822e-75
CERS2	Epithelial_cells	6.13628e-79	0.528029	0.807	0.241	8.73377e-75
ATP2A2	Epithelial_cells	4.58378e-78	0.516472	0.723	0.193	6.5241e-74
PLGRKT	Epithelial_cells	4.91805e-78	0.522623	0.752	0.218	6.99987e-74
RND3	Epithelial_cells	8.669e-78	0.578578	0.658	0.164	1.23386e-73
EBNA1BP2	Epithelial_cells	1.25305e-77	0.554609	0.817	0.253	1.78346e-73
CXCL14	Epithelial_cells	3.47355e-77	0.833636	0.586	0.142	4.9439e-73
PSMD6	Epithelial_cells	4.10797e-77	0.556851	0.851	0.278	5.84688e-73
IFITM2	Epithelial_cells	4.1297e-77	-1.23576	0.884	0.801	5.87781e-73
ROMO1	Epithelial_cells	4.16453e-77	0.64513	0.929	0.361	5.92737e-73
EIF6	Epithelial_cells	5.02833e-77	0.695659	0.956	0.456	7.15682e-73
MEA1	Epithelial_cells	6.27901e-77	0.639865	0.903	0.315	8.93692e-73
TAX1BP3	Epithelial_cells	1.07096e-76	0.780994	0.973	0.427	1.5243e-72
PTS	Epithelial_cells	1.95169e-76	0.565913	0.8	0.252	2.77784e-72
DYNLT3	Epithelial_cells	1.64897e-75	0.542075	0.83	0.257	2.34698e-71
CD55	Epithelial_cells	2.19229e-75	0.705594	0.943	0.384	3.12028e-71
LIMA1	Epithelial_cells	2.326e-75	0.66441	0.937	0.344	3.3106e-71
SMIM3	Epithelial_cells	2.88161e-75	0.528025	0.725	0.192	4.10139e-71
HM13	Epithelial_cells	4.34783e-75	0.720909	0.929	0.404	6.18826e-71
BTG1	Epithelial_cells	1.09284e-74	-1.01426	0.964	0.878	1.55544e-70
PHLDA1	Epithelial_cells	1.54122e-74	0.841004	0.887	0.378	2.19362e-70
CREB3	Epithelial_cells	4.84707e-74	0.509433	0.779	0.228	6.89884e-70
ADRM1	Epithelial_cells	3.23539e-73	0.665297	0.929	0.422	4.60493e-69
APLP2	Epithelial_cells	5.24233e-73	0.750017	0.983	0.464	7.46141e-69
CETN2	Epithelial_cells	1.11658e-72	0.532368	0.853	0.268	1.58923e-68
TYMS	Epithelial_cells	1.19446e-72	0.50321	0.351	0.043	1.70007e-68
RCN2	Epithelial_cells	4.92007e-72	0.633447	0.916	0.343	7.00273e-68
RRM2	Epithelial_cells	6.6436e-72	0.727425	0.263	0.017	9.45584e-68
CNIH4	Epithelial_cells	1.03736e-71	0.643066	0.914	0.358	1.47648e-67
H3F3B	Epithelial_cells	2.0381e-71	-0.509424	0.998	0.974	2.90083e-67
COPRS	Epithelial_cells	2.53624e-71	0.563777	0.777	0.244	3.60984e-67
NME1	Epithelial_cells	3.42357e-71	0.687374	0.908	0.374	4.87277e-67
UQCRB	Epithelial_cells	4.79658e-71	-0.588312	0.981	0.887	6.82698e-67
LMAN1	Epithelial_cells	7.98038e-71	0.701454	0.912	0.374	1.13585e-66
ZFP36	Epithelial_cells	1.45026e-70	-1.69781	0.62	0.743	2.06416e-66
UROD	Epithelial_cells	2.17579e-70	0.523393	0.786	0.252	3.09681e-66
SPHK1	Epithelial_cells	2.24663e-70	0.645921	0.685	0.199	3.19763e-66
CPNE1	Epithelial_cells	4.61662e-70	0.536976	0.889	0.322	6.57083e-66
LOXL2	Epithelial_cells	7.71207e-70	0.503918	0.576	0.138	1.09766e-65
FAM114A1	Epithelial_cells	3.68826e-69	0.553611	0.796	0.233	5.2495e-65
HDAC2	Epithelial_cells	9.96823e-69	0.609349	0.893	0.337	1.41878e-64
CDC20	Epithelial_cells	1.08678e-68	0.757793	0.277	0.025	1.54682e-64
KIAA0101	Epithelial_cells	1.22454e-68	0.669668	0.319	0.038	1.74289e-64
PLS3	Epithelial_cells	3.60477e-68	0.587129	0.847	0.286	5.13067e-64
TM9SF2	Epithelial_cells	4.13161e-68	0.539227	0.863	0.302	5.88052e-64
PTGR1	Epithelial_cells	7.2124e-68	0.584589	0.542	0.13	1.02654e-63
CHMP4B	Epithelial_cells	1.36369e-67	0.600647	0.901	0.328	1.94095e-63
UBE2S	Epithelial_cells	2.61857e-67	0.608557	0.693	0.214	3.72702e-63
TPX2	Epithelial_cells	7.17389e-67	0.608468	0.267	0.023	1.02106e-62
PLAUR	Epithelial_cells	7.22041e-67	0.716976	0.844	0.361	1.02768e-62
GSTM3	Epithelial_cells	1.44503e-66	0.59931	0.702	0.211	2.05671e-62
RBP1	Epithelial_cells	3.16411e-66	0.65121	0.74	0.25	4.50348e-62
CCNB2	Epithelial_cells	3.59703e-66	0.636539	0.261	0.021	5.11965e-62
MT-ND3	Epithelial_cells	4.29633e-66	-0.506634	0.941	0.939	6.11497e-62
UQCRC1	Epithelial_cells	6.0668e-66	0.616017	0.933	0.378	8.63487e-62
CTSZ	Epithelial_cells	1.38988e-65	0.621197	0.882	0.368	1.97822e-61
[truncated: 4,954 more rows]
