# Supplementary material for: Construction and experimental validation of a B cell-related gene signature to predict the prognosis and immunotherapeutic sensitivity in bladder cancer
Source: Aging (Albany NY). 2023 Jun 27;15(12):5355–80. doi: 10.18632/aging.204753 (PMC10333061; doi:10.18632/aging.204753)
Supplement: Supplementary Table 5 [file aging-15-204753-s005.xlsx]

## Sheet: Sheet1
Supplementary Table 5. The differentially-expressed genes between BLCA and adjacent normal tissues in TCGA-BLCA cohort.
gene	Ensembol ID	gene_type	logFC	logCPM	PValue	FDR
KLHL41	ENSG00000239474	protein_coding	-4.81535	0.178396	5.33e-96	1.75e-91
MYOM1	ENSG00000101605	protein_coding	-4.56314	2.59946	2.7e-94	4.44e-90
CLEC3B	ENSG00000163815	protein_coding	-4.42516	2.45006	1.02e-89	1.11e-85
LMOD3	ENSG00000163380	protein_coding	-3.87199	-1.22648	1.94e-88	1.59e-84
PPP1R12B	ENSG00000077157	protein_coding	-3.92988	6.56767	1.17e-82	7.66e-79
PYGM	ENSG00000068976	protein_coding	-4.6755	2.05903	3.74e-80	2.05e-76
HCG22	ENSG00000228789	lincRNA	-7.01375	-0.153565	5.87e-80	2.75e-76
SMTN	ENSG00000183963	protein_coding	-3.2424	6.98601	1.33e-79	5.45e-76
MBNL1-AS1	ENSG00000229619	antisense	-3.99637	2.73531	7.51e-79	2.74e-75
CSRP1	ENSG00000159176	protein_coding	-3.33027	8.52779	1.52e-78	5e-75
SYNM	ENSG00000182253	protein_coding	-5.40409	7.16909	6.6e-78	1.97e-74
PLCD4	ENSG00000115556	protein_coding	-2.88529	2.05878	4.63e-77	1.27e-73
EPM2A	ENSG00000112425	protein_coding	-2.63921	2.39258	7.16e-77	1.81e-73
TNS1	ENSG00000079308	protein_coding	-4.27866	7.64104	4.61e-75	1.08e-71
TCF21	ENSG00000118526	protein_coding	-4.21753	2.51878	5.83e-75	1.28e-71
FILIP1	ENSG00000118407	protein_coding	-4.33719	3.07551	8.25e-75	1.69e-71
SLMAP	ENSG00000163681	protein_coding	-2.60112	6.18604	1.85e-74	3.58e-71
AF001548.1	ENSG00000263065	antisense	-5.34577	-1.55163	5.21e-74	9.5e-71
AC036108.3	ENSG00000261616	antisense	-4.32402	0.149378	4.42e-73	7.64e-70
GLP2R	ENSG00000065325	protein_coding	-5.39179	1.08162	6.19e-72	1.02e-68
SYNPO2	ENSG00000172403	protein_coding	-5.10003	7.32069	5.26e-71	8.23e-68
HLF	ENSG00000108924	protein_coding	-4.66818	1.81761	1.96e-70	2.92e-67
LPP	ENSG00000145012	protein_coding	-2.83991	7.34941	2.26e-70	3.22e-67
FAM180B	ENSG00000196666	protein_coding	-5.00061	-2.64348	2.31e-69	3.17e-66
CFL2	ENSG00000165410	protein_coding	-3.23183	4.67674	1.49e-65	1.96e-62
AC103740.1	ENSG00000259370	antisense	-4.72889	-0.48182	5.18e-64	6.54e-61
MYLK	ENSG00000065534	protein_coding	-4.23322	7.56309	1.63e-63	1.99e-60
POPDC2	ENSG00000121577	protein_coding	-4.06042	3.03795	3.09e-63	3.63e-60
SLC25A25	ENSG00000148339	protein_coding	-2.67389	4.59621	5.14e-63	5.82e-60
SLC2A4	ENSG00000181856	protein_coding	-4.76217	2.33528	5.58e-63	6.11e-60
TPM1	ENSG00000140416	protein_coding	-3.4018	8.16717	2.23e-62	2.36e-59
FAM129A	ENSG00000135842	protein_coding	-3.72739	6.24195	2.53e-62	2.6e-59
MAP3K20	ENSG00000091436	protein_coding	-3.06468	6.00172	3.47e-61	3.45e-58
SCARA5	ENSG00000168079	protein_coding	-5.16685	3.14063	5.77e-61	5.58e-58
FLNC	ENSG00000128591	protein_coding	-4.98996	6.99104	1.16e-60	1.09e-57
SH3BGR	ENSG00000185437	protein_coding	-2.88136	2.18607	2.33e-60	2.12e-57
AL391335.1	ENSG00000250734	antisense	-4.60839	-3.36883	3.69e-60	3.27e-57
CSRNP1	ENSG00000144655	protein_coding	-2.73027	5.61651	5.88e-60	5.08e-57
CPED1	ENSG00000106034	protein_coding	-3.95009	3.26032	9.89e-60	8.33e-57
MYOCD	ENSG00000141052	protein_coding	-4.78486	3.24439	3.72e-59	3.05e-56
RYR3	ENSG00000198838	protein_coding	-2.98652	0.957872	3.84e-59	3.08e-56
KCNMA1	ENSG00000156113	protein_coding	-4.0924	3.94421	4.06e-59	3.17e-56
SVIL	ENSG00000197321	protein_coding	-2.91956	7.00153	1.91e-58	1.46e-55
ADAMTS9-AS1	ENSG00000241158	antisense	-5.00732	1.19792	3.09e-57	2.31e-54
TACR2	ENSG00000075073	protein_coding	-4.35581	2.14967	5.77e-57	4.21e-54
MYH11	ENSG00000133392	protein_coding	-5.33008	10.3208	8.45e-57	6.03e-54
SORBS1	ENSG00000095637	protein_coding	-4.32428	6.26673	1.7e-56	1.19e-53
ITPKB	ENSG00000143772	protein_coding	-2.09147	5.39647	1.03e-55	7.03e-53
FBXL22	ENSG00000197361	protein_coding	-3.49396	1.82771	1.47e-55	9.83e-53
NR4A1	ENSG00000123358	protein_coding	-3.76677	7.05889	9.58e-55	6.29e-52
AC005180.2	ENSG00000267505	lincRNA	-4.95551	0.721002	2.37e-54	1.53e-51
FHL1	ENSG00000022267	protein_coding	-4.34214	6.2449	3.88e-54	2.45e-51
AKAP6	ENSG00000151320	protein_coding	-3.85556	2.37815	4.12e-54	2.55e-51
RAB9B	ENSG00000123570	protein_coding	-3.56452	1.61619	5.6e-54	3.41e-51
NT5DC3	ENSG00000111696	protein_coding	-2.74071	3.82695	1.17e-53	6.99e-51
RANBP3L	ENSG00000164188	protein_coding	-4.61863	0.692162	2.28e-53	1.34e-50
PPP1R12A	ENSG00000058272	protein_coding	-1.92821	6.14023	3.22e-53	1.85e-50
GPRASP1	ENSG00000198932	protein_coding	-3.08069	2.77992	1.09e-52	6.19e-50
AF165147.1	ENSG00000232855	lincRNA	-4.45381	1.35102	1.59e-52	8.84e-50
KANK2	ENSG00000197256	protein_coding	-2.80482	6.46705	1.74e-52	9.53e-50
TNXB	ENSG00000168477	protein_coding	-4.26206	4.28062	2.56e-52	1.38e-49
EGR1	ENSG00000120738	protein_coding	-3.36975	8.11882	3.26e-52	1.73e-49
PSD	ENSG00000059915	protein_coding	-3.82687	4.00312	4.98e-52	2.59e-49
CAVIN2	ENSG00000168497	protein_coding	-3.80309	4.14989	6.56e-52	3.37e-49
PGM5	ENSG00000154330	protein_coding	-4.77388	5.33018	9.4e-52	4.75e-49
RBFOX3	ENSG00000167281	protein_coding	-5.21061	2.31947	1.51e-51	7.53e-49
NACC2	ENSG00000148411	protein_coding	-2.47475	4.8247	3.31e-51	1.62e-48
ADAMTSL3	ENSG00000156218	protein_coding	-4.24802	1.70988	5.17e-51	2.5e-48
DIXDC1	ENSG00000150764	protein_coding	-3.15168	3.83388	6.29e-51	2.96e-48
MYL9	ENSG00000101335	protein_coding	-3.84717	8.95145	6.31e-51	2.96e-48
KIAA1644	ENSG00000138944	protein_coding	-4.29655	2.63623	8.42e-51	3.9e-48
PTGS1	ENSG00000095303	protein_coding	-4.27346	6.10085	9.42e-51	4.29e-48
DMD	ENSG00000198947	protein_coding	-3.86273	4.05648	1.11e-50	4.98e-48
ITGA8	ENSG00000077943	protein_coding	-3.40308	3.48415	1.14e-50	5.06e-48
AC005180.1	ENSG00000267405	lincRNA	-5.12413	0.256367	1.43e-50	6.24e-48
FAM107A	ENSG00000168309	protein_coding	-3.97889	3.07856	1.98e-50	8.57e-48
FNBP1	ENSG00000187239	protein_coding	-2.38931	5.66795	2.26e-50	9.65e-48
RASSF3	ENSG00000153179	protein_coding	-2.32324	5.31507	3.64e-50	1.53e-47
CBX7	ENSG00000100307	protein_coding	-2.4256	4.7769	4.11e-50	1.71e-47
ADAMTS1	ENSG00000154734	protein_coding	-3.36405	6.40198	4.21e-50	1.73e-47
NEGR1	ENSG00000172260	protein_coding	-4.12319	3.10989	4.74e-50	1.92e-47
LIMS2	ENSG00000072163	protein_coding	-3.36301	4.96877	1.18e-49	4.71e-47
DSTN	ENSG00000125868	protein_coding	-1.92504	8.7198	1.53e-49	6.05e-47
ADAMTS9-AS2	ENSG00000241684	antisense	-4.02849	-0.918804	4.92e-49	1.92e-46
KCNB1	ENSG00000158445	protein_coding	-4.72284	0.575913	5.46e-49	2.11e-46
F10	ENSG00000126218	protein_coding	-3.61767	1.09641	5.75e-49	2.2e-46
HSPB6	ENSG00000004776	protein_coding	-4.71442	5.32117	6.8e-49	2.57e-46
BHMT2	ENSG00000132840	protein_coding	-4.00178	0.982875	6.92e-49	2.58e-46
LMOD1	ENSG00000163431	protein_coding	-4.3924	6.35793	7.02e-49	2.59e-46
ITIH5	ENSG00000123243	protein_coding	-3.53663	4.93931	1.08e-48	3.94e-46
PLPPR4	ENSG00000117600	protein_coding	-3.55011	1.66011	1.52e-48	5.47e-46
PGM5P4	ENSG00000225398	unprocessed_pseudogene	-5.21438	-2.0182	1.93e-48	6.87e-46
PALLD	ENSG00000129116	protein_coding	-3.10263	7.55529	1.95e-48	6.87e-46
RCAN2	ENSG00000172348	protein_coding	-3.19401	3.91871	4.05e-48	1.42e-45
SRF	ENSG00000112658	protein_coding	-1.64393	6.21383	5.19e-48	1.79e-45
FLNA	ENSG00000196924	protein_coding	-3.24314	10.4965	5.46e-48	1.87e-45
PI16	ENSG00000164530	protein_coding	-5.51116	3.94886	3.79e-47	1.28e-44
C1QTNF7	ENSG00000163145	protein_coding	-3.70149	1.49404	3.94e-47	1.32e-44
PDE1C	ENSG00000154678	protein_coding	-3.7714	1.76235	4.85e-47	1.61e-44
PLPP3	ENSG00000162407	protein_coding	-2.32846	5.75889	5.8e-47	1.9e-44
CFD	ENSG00000197766	protein_coding	-3.65393	5.10054	1.18e-46	3.85e-44
CACNA1H	ENSG00000196557	protein_coding	-3.55543	4.73472	2.91e-46	9.36e-44
ADGRG4	ENSG00000156920	protein_coding	-4.94508	-3.70061	3.3e-46	1.05e-43
SPINK5	ENSG00000133710	protein_coding	-4.53278	5.34967	4.38e-46	1.38e-43
ITPR1	ENSG00000150995	protein_coding	-2.78735	4.7347	7.52e-46	2.35e-43
EGR3	ENSG00000179388	protein_coding	-3.66714	3.77195	1.13e-45	3.5e-43
AP001107.5	ENSG00000254510	processed_transcript	-4.20055	-0.425745	1.16e-45	3.57e-43
CRY2	ENSG00000121671	protein_coding	-1.64429	4.7498	1.26e-45	3.83e-43
TLN1	ENSG00000137076	protein_coding	-2.02298	8.38159	1.62e-45	4.87e-43
SORBS2	ENSG00000154556	protein_coding	-3.583	4.80435	3.44e-45	1.03e-42
CGNL1	ENSG00000128849	protein_coding	-3.22478	3.30587	3.84e-45	1.13e-42
RAB23	ENSG00000112210	protein_coding	-2.94666	3.76416	4.07e-45	1.19e-42
KCNMB1	ENSG00000145936	protein_coding	-3.86321	3.81787	4.51e-45	1.31e-42
TMPRSS11B	ENSG00000185873	protein_coding	-8.07106	0.597617	5.58e-45	1.61e-42
ZFP36	ENSG00000128016	protein_coding	-2.85011	8.45067	7.49e-45	2.14e-42
NPY6R	ENSG00000226306	transcribed_processed_pseudogene	-4.99791	-0.161767	7.66e-45	2.17e-42
AC135012.3	ENSG00000268505	lincRNA	-4.1586	-1.21726	8.15e-45	2.29e-42
FGL2	ENSG00000127951	protein_coding	-3.54697	4.78286	8.24e-45	2.29e-42
DMGDH	ENSG00000132837	protein_coding	-2.77231	-0.792027	8.57e-45	2.37e-42
MSRB3	ENSG00000174099	protein_coding	-3.53612	5.15833	1.08e-44	2.94e-42
AC012085.2	ENSG00000258274	antisense	-4.7152	-0.754798	1.08e-44	2.94e-42
SOBP	ENSG00000112320	protein_coding	-3.20552	2.44182	1.13e-44	3.03e-42
LINC01082	ENSG00000269186	lincRNA	-4.01177	-0.169349	1.64e-44	4.39e-42
RBPMS2	ENSG00000166831	protein_coding	-3.63523	3.54124	2.06e-44	5.47e-42
PRUNE2	ENSG00000106772	protein_coding	-4.45619	4.62243	2.74e-44	7.19e-42
RNF150	ENSG00000170153	protein_coding	-3.54185	2.94335	3.02e-44	7.88e-42
NR4A3	ENSG00000119508	protein_coding	-3.82385	4.1365	3.17e-44	8.2e-42
CRNN	ENSG00000143536	protein_coding	-8.52769	5.36577	4.49e-44	1.15e-41
DMPK	ENSG00000104936	protein_coding	-2.07097	5.84893	5.81e-44	1.48e-41
ZEB1	ENSG00000148516	protein_coding	-2.94049	4.45312	6.97e-44	1.76e-41
PCSK7	ENSG00000160613	protein_coding	-1.94565	4.82151	7.75e-44	1.94e-41
SVEP1	ENSG00000165124	protein_coding	-3.07162	3.65403	7.81e-44	1.94e-41
KCNE4	ENSG00000152049	protein_coding	-3.54981	3.2686	8.31e-44	2.05e-41
DTNA	ENSG00000134769	protein_coding	-3.93031	3.4673	1.3e-43	3.18e-41
CNN1	ENSG00000130176	protein_coding	-4.59367	7.59561	1.81e-43	4.41e-41
AC096745.2	ENSG00000280551	TEC	-4.06262	-2.022	1.84e-43	4.45e-41
MICU3	ENSG00000155970	protein_coding	-3.24992	0.452934	2.05e-43	4.91e-41
CALD1	ENSG00000122786	protein_coding	-3.124	8.14193	2.11e-43	5.02e-41
AOC3	ENSG00000131471	protein_coding	-3.48031	5.54966	3.09e-43	7.31e-41
FYCO1	ENSG00000163820	protein_coding	-2.00435	5.73804	3.15e-43	7.4e-41
TARID	ENSG00000227954	antisense	-3.87266	-1.23323	5.22e-43	1.22e-40
MYOC	ENSG00000034971	protein_coding	-5.47404	0.647649	5.38e-43	1.24e-40
NEXN	ENSG00000162614	protein_coding	-3.30657	4.09374	5.66e-43	1.3e-40
PER2	ENSG00000132326	protein_coding	-2.16146	4.25711	6.41e-43	1.46e-40
CARMN	ENSG00000249669	lincRNA	-3.84406	1.70744	7.27e-43	1.65e-40
P2RX1	ENSG00000108405	protein_coding	-4.41442	3.44122	7.68e-43	1.73e-40
MUC21	ENSG00000204544	protein_coding	-6.39307	3.86068	9.57e-43	2.14e-40
CCDC69	ENSG00000198624	protein_coding	-2.72598	5.45591	1.02e-42	2.27e-40
RAP1A	ENSG00000116473	protein_coding	-1.47322	6.21192	1.22e-42	2.69e-40
ACACB	ENSG00000076555	protein_coding	-2.74266	3.88523	1.27e-42	2.78e-40
FAXDC2	ENSG00000170271	protein_coding	-2.7819	2.97685	1.96e-42	4.27e-40
PJA2	ENSG00000198961	protein_coding	-1.82397	6.11976	2.68e-42	5.78e-40
CRYAB	ENSG00000109846	protein_coding	-3.66822	5.0069	2.88e-42	6.18e-40
MAP1B	ENSG00000131711	protein_coding	-3.36771	5.58617	2.92e-42	6.22e-40
MAP1A	ENSG00000166963	protein_coding	-3.25005	4.19345	4.12e-42	8.73e-40
ITGB1BP2	ENSG00000147166	protein_coding	-2.67897	0.813017	6.4e-42	1.35e-39
MIR23A	ENSG00000207980	miRNA	-3.84234	-2.26746	7.76e-42	1.62e-39
HMCN2	ENSG00000148357	protein_coding	-3.64354	2.51729	8.89e-42	1.85e-39
CACNB2	ENSG00000165995	protein_coding	-3.15864	1.86344	9.78e-42	2.02e-39
SPARCL1	ENSG00000152583	protein_coding	-3.10094	7.28695	1.27e-41	2.6e-39
C16orf89	ENSG00000153446	protein_coding	-4.29762	1.40428	1.68e-41	3.43e-39
HDAC4	ENSG00000068024	protein_coding	-2.06439	3.79339	9.37e-41	1.9e-38
KLHL30-AS1	ENSG00000279484	TEC	-4.19003	-2.80435	9.81e-41	1.98e-38
PDZRN4	ENSG00000165966	protein_coding	-4.81027	1.63976	1.15e-40	2.31e-38
PDK4	ENSG00000004799	protein_coding	-3.59391	5.25547	1.49e-40	2.97e-38
KLF2	ENSG00000127528	protein_coding	-2.8373	4.30062	2.74e-40	5.42e-38
FENDRR	ENSG00000268388	lincRNA	-3.7979	3.64834	3.53e-40	6.95e-38
GSN	ENSG00000148180	protein_coding	-2.36251	8.89629	3.89e-40	7.61e-38
DUSP1	ENSG00000120129	protein_coding	-3.05441	8.102	4.48e-40	8.71e-38
ALDH1B1	ENSG00000137124	protein_coding	-2.57251	5.93349	7.49e-40	1.45e-37
FOXF1	ENSG00000103241	protein_coding	-3.10188	4.00346	1.58e-39	3.03e-37
NKAPL	ENSG00000189134	protein_coding	-3.15901	-1.86145	2.4e-39	4.59e-37
P2RY14	ENSG00000174944	protein_coding	-3.10573	0.84647	2.43e-39	4.62e-37
VEGFD	ENSG00000165197	protein_coding	-3.67516	0.55392	3.54e-39	6.68e-37
ZNF710-AS1	ENSG00000259291	antisense	-2.42607	1.90884	6.66e-39	1.25e-36
ACTN2	ENSG00000077522	protein_coding	-4.49636	0.938024	1.1e-38	2.06e-36
SOX17	ENSG00000164736	protein_coding	-2.84646	1.70026	1.16e-38	2.15e-36
AC022893.1	ENSG00000253636	antisense	-2.8488	0.43661	1.43e-38	2.64e-36
DOK6	ENSG00000206052	protein_coding	-3.61948	1.76083	1.53e-38	2.8e-36
FOS	ENSG00000170345	protein_coding	-3.05498	8.9794	1.93e-38	3.51e-36
AF001548.3	ENSG00000280429	TEC	-4.4056	-2.9049	2e-38	3.62e-36
RASL12	ENSG00000103710	protein_coding	-3.07889	3.53646	3.42e-38	6.18e-36
TPPP	ENSG00000171368	protein_coding	-3.35494	2.90297	3.66e-38	6.56e-36
HAND2-AS1	ENSG00000237125	antisense	-4.28573	1.27904	3.98e-38	7.08e-36
LRRC3B	ENSG00000179796	protein_coding	-5.12305	-1.60047	3.99e-38	7.08e-36
PAMR1	ENSG00000149090	protein_coding	-2.81426	3.41734	5.02e-38	8.86e-36
AP000892.3	ENSG00000280143	TEC	-3.65333	3.51108	8.6e-38	1.5e-35
ABL1	ENSG00000097007	protein_coding	-1.59705	6.42859	8.61e-38	1.5e-35
MAT2A	ENSG00000168906	protein_coding	-1.64303	7.0916	9.06e-38	1.57e-35
FOSB	ENSG00000125740	protein_coding	-3.73279	7.58428	9.22e-38	1.59e-35
LINC02334	ENSG00000274317	lincRNA	-3.62308	-2.43835	1.31e-37	2.26e-35
MORN5	ENSG00000185681	protein_coding	-4.85023	-1.95054	1.56e-37	2.66e-35
LRRC2	ENSG00000163827	protein_coding	-3.8329	-0.13617	1.72e-37	2.92e-35
TMOD1	ENSG00000136842	protein_coding	-3.55981	2.22855	1.73e-37	2.92e-35
ACTG2	ENSG00000163017	protein_coding	-4.2942	8.6934	1.99e-37	3.35e-35
ADGRD1	ENSG00000111452	protein_coding	-4.09706	2.81721	2.22e-37	3.72e-35
AC087521.1	ENSG00000244953	lincRNA	-3.30046	-1.48477	2.64e-37	4.39e-35
FERMT2	ENSG00000073712	protein_coding	-2.81895	5.30074	3.16e-37	5.24e-35
DNAJB4	ENSG00000162616	protein_coding	-2.16877	4.20099	3.24e-37	5.35e-35
GNAL	ENSG00000141404	protein_coding	-2.88186	3.01727	3.62e-37	5.95e-35
AC036108.2	ENSG00000261054	antisense	-3.45005	-3.14839	4.18e-37	6.83e-35
ASB2	ENSG00000100628	protein_coding	-3.44899	3.01785	4.28e-37	6.95e-35
RCAN1	ENSG00000159200	protein_coding	-2.60144	5.87396	4.75e-37	7.69e-35
DNAJB5	ENSG00000137094	protein_coding	-2.82386	3.90471	6.38e-37	1.03e-34
PPP1R14A	ENSG00000167641	protein_coding	-3.09971	3.63273	7.44e-37	1.19e-34
LINC00641	ENSG00000258441	processed_transcript	-2.14113	2.54481	7.91e-37	1.26e-34
AL354861.3	ENSG00000268926	lincRNA	-4.27126	-3.63038	9.18e-37	1.46e-34
METTL24	ENSG00000053328	protein_coding	-3.66182	-1.06414	9.84e-37	1.55e-34
LEXM	ENSG00000162398	protein_coding	-3.82252	-1.04477	1.06e-36	1.67e-34
BX276092.9	ENSG00000281852	lincRNA	-3.84393	-2.89968	1.14e-36	1.78e-34
MRVI1	ENSG00000072952	protein_coding	-3.04713	4.86753	2.06e-36	3.2e-34
ARHGAP20	ENSG00000137727	protein_coding	-3.22269	0.958787	2.62e-36	4.05e-34
KLF9	ENSG00000119138	protein_coding	-2.65838	5.06383	3.08e-36	4.75e-34
DCUN1D3	ENSG00000188215	protein_coding	-1.67977	3.9994	3.56e-36	5.47e-34
LTBP4	ENSG00000090006	protein_coding	-2.45777	6.53784	3.59e-36	5.49e-34
IGSF9B	ENSG00000080854	protein_coding	-3.52252	0.106937	5.91e-36	8.99e-34
C2orf40	ENSG00000119147	protein_coding	-4.59942	1.39641	6.1e-36	9.24e-34
AP003548.1	ENSG00000253105	lincRNA	-3.92053	-3.749	6.24e-36	9.41e-34
ADARB1	ENSG00000197381	protein_coding	-2.60716	4.93627	6.3e-36	9.45e-34
CASQ2	ENSG00000118729	protein_coding	-4.77904	3.59941	6.33e-36	9.45e-34
PRKG1	ENSG00000185532	protein_coding	-3.00668	2.81678	7.67e-36	1.14e-33
LINC00330	ENSG00000235097	lincRNA	-5.1903	-3.27885	8.89e-36	1.32e-33
PDE4D	ENSG00000113448	protein_coding	-2.28445	4.57796	9.94e-36	1.46e-33
TMEM252	ENSG00000181778	protein_coding	-5.09103	-0.786477	1.09e-35	1.59e-33
SYNE1	ENSG00000131018	protein_coding	-2.47379	4.89573	1.29e-35	1.88e-33
JAM3	ENSG00000166086	protein_coding	-2.74563	4.49497	1.3e-35	1.89e-33
PRELP	ENSG00000188783	protein_coding	-3.65996	5.06391	1.62e-35	2.34e-33
TBX20	ENSG00000164532	protein_coding	-4.43448	-0.146507	1.77e-35	2.55e-33
CMTM5	ENSG00000166091	protein_coding	-3.74364	-2.39932	1.78e-35	2.55e-33
SLIT3	ENSG00000184347	protein_coding	-3.09657	5.46186	1.93e-35	2.76e-33
SORCS1	ENSG00000108018	protein_coding	-4.34344	-0.104982	2.12e-35	3.02e-33
LDLRAD2	ENSG00000187942	protein_coding	-2.32307	0.551868	2.16e-35	3.05e-33
CH25H	ENSG00000138135	protein_coding	-3.21298	2.23501	2.83e-35	3.99e-33
ACTC1	ENSG00000159251	protein_coding	-5.2753	6.39575	2.94e-35	4.13e-33
PRDM6	ENSG00000061455	protein_coding	-3.24561	2.63326	3.81e-35	5.32e-33
MIR4697HG	ENSG00000280237	TEC	-3.7476	1.47116	4.33e-35	6.02e-33
ILK	ENSG00000166333	protein_coding	-2.0384	3.34272	4.55e-35	6.3e-33
PGR	ENSG00000082175	protein_coding	-3.30343	0.722895	4.59e-35	6.33e-33
MXRA7	ENSG00000182534	protein_coding	-2.22027	5.93267	5.23e-35	7.19e-33
PDE5A	ENSG00000138735	protein_coding	-2.59434	4.07534	7.79e-35	1.07e-32
ATP1A2	ENSG00000018625	protein_coding	-4.68169	3.41814	7.88e-35	1.07e-32
SVILP1	ENSG00000234814	transcribed_unprocessed_pseudogene	-2.89781	-0.444491	7.96e-35	1.08e-32
PTGES3L	ENSG00000267060	protein_coding	-2.56705	-0.0455916	7.97e-35	1.08e-32
MEF2D	ENSG00000116604	protein_coding	-1.28986	5.81677	8.64e-35	1.16e-32
NR4A2	ENSG00000153234	protein_coding	-2.831	4.52737	8.86e-35	1.19e-32
NTRK3	ENSG00000140538	protein_coding	-3.90573	0.637932	1.15e-34	1.54e-32
ACTA2	ENSG00000107796	protein_coding	-3.30503	8.73994	1.25e-34	1.66e-32
AFF3	ENSG00000144218	protein_coding	-3.79886	2.03709	1.43e-34	1.89e-32
ZCCHC24	ENSG00000165424	protein_coding	-2.6866	4.69431	1.45e-34	1.91e-32
PLP1	ENSG00000123560	protein_coding	-4.30151	0.756731	1.6e-34	2.09e-32
TEAD1	ENSG00000187079	protein_coding	-1.95141	5.98167	1.6e-34	2.09e-32
HPR	ENSG00000261701	protein_coding	-4.78088	-2.66346	1.61e-34	2.1e-32
MYH2	ENSG00000125414	protein_coding	-5.16608	-1.93886	2.1e-34	2.73e-32
ABI3BP	ENSG00000154175	protein_coding	-3.32475	3.94996	2.42e-34	3.13e-32
CACNA1C	ENSG00000151067	protein_coding	-2.99477	3.70886	2.44e-34	3.15e-32
LMO3	ENSG00000048540	protein_coding	-3.76204	3.43332	2.61e-34	3.35e-32
SRL	ENSG00000185739	protein_coding	-3.09363	-0.355388	2.9e-34	3.7e-32
RHOB	ENSG00000143878	protein_coding	-2.14091	8.03618	3.32e-34	4.23e-32
RNF122	ENSG00000133874	protein_coding	-2.05077	3.46705	7.45e-34	9.45e-32
ATF3	ENSG00000162772	protein_coding	-3.1024	6.7983	7.57e-34	9.56e-32
USP12	ENSG00000152484	protein_coding	-1.50605	4.86579	8.76e-34	1.1e-31
AL161457.1	ENSG00000229019	sense_intronic	-4.61073	-3.50581	1.21e-33	1.52e-31
LSM11	ENSG00000155858	protein_coding	-1.70787	3.29316	1.46e-33	1.83e-31
REEP1	ENSG00000068615	protein_coding	-3.83014	2.41635	1.51e-33	1.87e-31
C11orf96	ENSG00000187479	protein_coding	-3.09291	5.43618	1.52e-33	1.88e-31
ARID5B	ENSG00000150347	protein_coding	-1.97899	6.07924	1.58e-33	1.96e-31
PLAC9	ENSG00000189129	protein_coding	-2.96881	2.3223	2.41e-33	2.96e-31
STARD9	ENSG00000159433	protein_coding	-2.34991	2.71774	2.91e-33	3.57e-31
TP53INP2	ENSG00000078804	protein_coding	-2.25085	5.50597	3.71e-33	4.53e-31
MTURN	ENSG00000180354	protein_coding	-2.01676	4.9056	3.96e-33	4.81e-31
GADD45B	ENSG00000099860	protein_coding	-2.64806	5.96081	4.51e-33	5.47e-31
GUCA1C	ENSG00000138472	protein_coding	-6.84993	-2.33228	6.23e-33	7.52e-31
PCOLCE2	ENSG00000163710	protein_coding	-3.76451	2.82853	6.48e-33	7.79e-31
SBSPON	ENSG00000164764	protein_coding	-3.38767	3.67031	6.83e-33	8.19e-31
TPM2	ENSG00000198467	protein_coding	-3.0907	8.34004	7.24e-33	8.65e-31
TNS2	ENSG00000111077	protein_coding	-2.04927	5.35525	9.27e-33	1.1e-30
CYR61	ENSG00000142871	protein_coding	-2.92403	7.73577	1.02e-32	1.21e-30
EMP1	ENSG00000134531	protein_coding	-2.85059	7.5835	1.05e-32	1.24e-30
GEM	ENSG00000164949	protein_coding	-3.15771	4.43503	1.13e-32	1.33e-30
WWTR1	ENSG00000018408	protein_coding	-2.06676	5.87486	1.57e-32	1.83e-30
BAG2	ENSG00000112208	protein_coding	-2.61967	4.15486	1.57e-32	1.83e-30
SCN11A	ENSG00000168356	protein_coding	-4.33618	1.51837	1.59e-32	1.85e-30
JAM2	ENSG00000154721	protein_coding	-2.64217	2.89567	1.63e-32	1.9e-30
VCL	ENSG00000035403	protein_coding	-1.83879	7.62024	1.73e-32	2e-30
C20orf166-AS1	ENSG00000174403	antisense	-4.239	-0.147746	1.88e-32	2.16e-30
OGN	ENSG00000106809	protein_coding	-4.54827	2.84929	2.03e-32	2.33e-30
JPH2	ENSG00000149596	protein_coding	-3.4907	4.08577	2.07e-32	2.37e-30
PDE1A	ENSG00000115252	protein_coding	-2.94748	2.0128	2.1e-32	2.4e-30
AQP1	ENSG00000240583	protein_coding	-2.3944	6.47264	2.88e-32	3.27e-30
LINC01778	ENSG00000223382	lincRNA	-3.70366	-2.63453	4.49e-32	5.08e-30
CCL2	ENSG00000108691	protein_coding	-3.21027	5.04198	4.72e-32	5.33e-30
FOXN3	ENSG00000053254	protein_coding	-1.6416	5.72429	4.78e-32	5.37e-30
KY	ENSG00000174611	protein_coding	-3.28793	-1.62169	5.21e-32	5.84e-30
MAMDC2	ENSG00000165072	protein_coding	-3.53743	2.72088	6.19e-32	6.91e-30
HBEGF	ENSG00000113070	protein_coding	-2.78326	5.47399	8.53e-32	9.49e-30
NFASC	ENSG00000163531	protein_coding	-2.7882	3.66498	8.57e-32	9.51e-30
ARID5A	ENSG00000196843	protein_coding	-2.03234	4.94321	1.12e-31	1.24e-29
GNAO1	ENSG00000087258	protein_coding	-3.42104	2.54623	1.13e-31	1.24e-29
AC011239.2	ENSG00000279526	TEC	-3.16089	-2.77275	1.28e-31	1.4e-29
MIR27A	ENSG00000207808	miRNA	-4.00883	-2.89246	1.41e-31	1.55e-29
FXYD6	ENSG00000137726	protein_coding	-3.3767	4.3786	1.43e-31	1.56e-29
AC079313.2	ENSG00000258137	antisense	-4.23699	-1.08195	1.55e-31	1.69e-29
RPL10P7	ENSG00000242052	processed_pseudogene	-3.16955	-3.24946	2.03e-31	2.2e-29
PLN	ENSG00000198523	protein_coding	-4.05696	3.80987	2.62e-31	2.83e-29
CPEB1	ENSG00000214575	protein_coding	-3.40096	0.378325	3.21e-31	3.45e-29
PID1	ENSG00000153823	protein_coding	-3.0466	2.23919	3.28e-31	3.52e-29
GNG7	ENSG00000176533	protein_coding	-2.76239	2.2111	5.29e-31	5.66e-29
CAMK2A	ENSG00000070808	protein_coding	-3.6547	0.0182859	6.65e-31	7.09e-29
APOLD1	ENSG00000178878	protein_coding	-2.40485	4.96087	8.07e-31	8.58e-29
PRKN	ENSG00000185345	protein_coding	-2.69231	0.705644	8.96e-31	9.49e-29
TPSG1	ENSG00000116176	protein_coding	-3.19747	-1.77204	9.66e-31	1.02e-28
RAI2	ENSG00000131831	protein_coding	-2.71927	2.80497	1.07e-30	1.13e-28
STON1	ENSG00000243244	protein_coding	-2.52609	3.54767	2.91e-30	3.05e-28
KCNA5	ENSG00000130037	protein_coding	-3.31892	-0.737396	2.93e-30	3.06e-28
COX7A1	ENSG00000161281	protein_coding	-2.63911	2.81704	3.09e-30	3.22e-28
PGM5P4-AS1	ENSG00000231943	lincRNA	-4.13945	-3.42743	3.12e-30	3.24e-28
DACT3	ENSG00000197380	protein_coding	-3.16411	3.20883	3.52e-30	3.65e-28
PKD1	ENSG00000008710	protein_coding	-1.50977	5.76112	3.71e-30	3.83e-28
CLIP3	ENSG00000105270	protein_coding	-2.88358	4.41942	3.91e-30	4.03e-28
TAGLN	ENSG00000149591	protein_coding	-3.25407	8.95541	4.34e-30	4.46e-28
C3orf70	ENSG00000187068	protein_coding	-2.82463	2.90019	5.93e-30	6.07e-28
PDE2A	ENSG00000186642	protein_coding	-2.62777	3.19164	5.98e-30	6.1e-28
LINC00702	ENSG00000233117	lincRNA	-3.45889	1.49278	6.57e-30	6.68e-28
FBXL7	ENSG00000183580	protein_coding	-2.56502	2.94814	8.28e-30	8.39e-28
PKMP3	ENSG00000220563	processed_pseudogene	-2.576	-1.47691	8.99e-30	9.08e-28
ZBTB16	ENSG00000109906	protein_coding	-3.69796	1.03262	1.15e-29	1.16e-27
CKMT2	ENSG00000131730	protein_coding	-2.72612	0.0946221	1.38e-29	1.39e-27
SLC25A23	ENSG00000125648	protein_coding	-2.15009	5.30019	1.42e-29	1.42e-27
AL162424.1	ENSG00000269970	sense_intronic	-3.73974	-2.02811	1.44e-29	1.43e-27
NECAB1	ENSG00000123119	protein_coding	-3.15603	1.78147	1.62e-29	1.61e-27
MIR22HG	ENSG00000186594	lincRNA	-2.08638	4.53015	1.63e-29	1.62e-27
ANTXR2	ENSG00000163297	protein_coding	-2.42792	5.75043	1.89e-29	1.87e-27
ADAMTS4	ENSG00000158859	protein_coding	-2.91163	5.34672	3.47e-29	3.42e-27
MEF2C-AS1	ENSG00000248309	antisense	-3.1988	-1.57226	3.85e-29	3.79e-27
RNF180	ENSG00000164197	protein_coding	-2.57633	1.25139	3.87e-29	3.79e-27
FXYD1	ENSG00000266964	protein_coding	-3.02337	-0.584787	4.04e-29	3.95e-27
VIPR2	ENSG00000106018	protein_coding	-3.43306	-0.570073	4.8e-29	4.68e-27
ADH1B	ENSG00000196616	protein_coding	-4.50447	4.03625	5.19e-29	5.05e-27
KLHL42	ENSG00000087448	protein_coding	-1.51727	5.04472	5.25e-29	5.08e-27
TACR3	ENSG00000169836	protein_coding	-4.46359	-0.973475	5.64e-29	5.45e-27
MYOM2	ENSG00000036448	protein_coding	-2.70497	0.629825	5.72e-29	5.51e-27
RGS2	ENSG00000116741	protein_coding	-2.79561	5.82027	7.27e-29	6.98e-27
RYR2	ENSG00000198626	protein_coding	-3.29569	1.86955	1e-28	9.58e-27
NR3C2	ENSG00000151623	protein_coding	-3.10311	2.43026	1e-28	9.58e-27
CD34	ENSG00000174059	protein_coding	-2.03262	5.46132	1.08e-28	1.03e-26
CTGF	ENSG00000118523	protein_coding	-2.98833	7.57388	1.11e-28	1.06e-26
CNGA3	ENSG00000144191	protein_coding	-3.87025	-2.13334	1.7e-28	1.61e-26
NCS1	ENSG00000107130	protein_coding	-2.0823	5.79935	1.83e-28	1.73e-26
ITGA7	ENSG00000135424	protein_coding	-2.87324	4.73886	1.84e-28	1.73e-26
MYH3	ENSG00000109063	protein_coding	-3.07885	2.76083	1.88e-28	1.77e-26
PKIG	ENSG00000168734	protein_coding	-2.06365	5.4593	2.03e-28	1.9e-26
PARVA	ENSG00000197702	protein_coding	-1.66827	6.05995	2.2e-28	2.05e-26
SLC25A4	ENSG00000151729	protein_coding	-1.64751	4.84875	2.49e-28	2.31e-26
ABCA8	ENSG00000141338	protein_coding	-3.38512	2.38548	2.75e-28	2.55e-26
ZNF106	ENSG00000103994	protein_coding	-1.50719	5.58498	3.57e-28	3.3e-26
ANGPTL7	ENSG00000171819	protein_coding	-4.15462	-0.913304	3.64e-28	3.36e-26
ODF3L1	ENSG00000182950	protein_coding	-2.88038	-0.741608	4.27e-28	3.92e-26
CSGALNACT1	ENSG00000147408	protein_coding	-2.06528	3.67644	4.36e-28	4e-26
TMEM132C	ENSG00000181234	protein_coding	-4.36121	-0.208442	4.5e-28	4.12e-26
SLC8A1	ENSG00000183023	protein_coding	-2.51976	3.76125	6.01e-28	5.48e-26
VSTM4	ENSG00000165633	protein_coding	-2.46482	3.53526	6.42e-28	5.84e-26
PDZRN3	ENSG00000121440	protein_coding	-3.00401	3.84539	6.8e-28	6.17e-26
MRGPRF	ENSG00000172935	protein_coding	-2.99214	4.04423	6.86e-28	6.2e-26
ARHGEF25	ENSG00000240771	protein_coding	-2.41157	4.10749	7.14e-28	6.44e-26
AOX1	ENSG00000138356	protein_coding	-3.55457	2.23812	7.42e-28	6.67e-26
PLCL1	ENSG00000115896	protein_coding	-2.45139	1.44298	7.71e-28	6.91e-26
AC084880.1	ENSG00000213144	processed_pseudogene	-2.99782	0.214191	7.91e-28	7.08e-26
ADCY5	ENSG00000173175	protein_coding	-3.34081	3.63389	9.21e-28	8.22e-26
HSPB7	ENSG00000173641	protein_coding	-3.77223	4.01726	1.03e-27	9.19e-26
ELANE	ENSG00000197561	protein_coding	-3.62673	-2.5086	1.05e-27	9.32e-26
SGCA	ENSG00000108823	protein_coding	-3.58616	2.38434	1.3e-27	1.16e-25
PRICKLE2	ENSG00000163637	protein_coding	-2.30498	3.8062	1.37e-27	1.21e-25
AC009299.2	ENSG00000232320	processed_pseudogene	-2.36837	-1.65703	1.39e-27	1.22e-25
AC026469.1	ENSG00000275088	lincRNA	-3.09642	-2.86982	1.5e-27	1.32e-25
FAM189A2	ENSG00000135063	protein_coding	-2.73058	1.83368	1.64e-27	1.44e-25
LRRC37A17P	ENSG00000263142	transcribed_unprocessed_pseudogene	-1.94909	1.42458	1.68e-27	1.46e-25
PRKAG2	ENSG00000106617	protein_coding	-1.63738	4.36105	1.75e-27	1.52e-25
THBS1	ENSG00000137801	protein_coding	-2.7393	8.69269	1.87e-27	1.62e-25
NFIX	ENSG00000008441	protein_coding	-2.12796	5.46144	1.95e-27	1.69e-25
EML1	ENSG00000066629	protein_coding	-2.42879	3.8204	2.46e-27	2.12e-25
GATA6	ENSG00000141448	protein_coding	-2.80323	2.91189	2.75e-27	2.37e-25
KIAA0408	ENSG00000189367	protein_coding	-3.97192	-3.13145	2.8e-27	2.41e-25
STAT5B	ENSG00000173757	protein_coding	-1.07699	5.98298	2.92e-27	2.5e-25
IER3	ENSG00000137331	protein_coding	-2.42545	6.60606	3.94e-27	3.37e-25
VIT	ENSG00000205221	protein_coding	-4.55829	0.88841	4.35e-27	3.71e-25
LAMA2	ENSG00000196569	protein_coding	-2.47931	4.22372	5.64e-27	4.79e-25
RGS22	ENSG00000132554	protein_coding	-3.20522	-1.41587	5.75e-27	4.88e-25
ROCK2	ENSG00000134318	protein_coding	-1.29323	5.91907	6.1e-27	5.16e-25
MIR497HG	ENSG00000267532	antisense	-2.31177	-0.266321	6.73e-27	5.68e-25
CELF2	ENSG00000048740	protein_coding	-2.61755	3.90026	6.91e-27	5.82e-25
PTGFR	ENSG00000122420	protein_coding	-3.45383	1.67484	7.81e-27	6.56e-25
MPZ	ENSG00000158887	protein_coding	-2.31708	1.29391	8.07e-27	6.76e-25
COL19A1	ENSG00000082293	protein_coding	-4.17185	0.0623367	8.72e-27	7.28e-25
ASPA	ENSG00000108381	protein_coding	-3.2759	0.914676	9.34e-27	7.78e-25
STUM	ENSG00000203685	protein_coding	-3.87475	1.93361	1.09e-26	9.09e-25
FILIP1L	ENSG00000168386	protein_coding	-2.56344	5.40081	1.12e-26	9.25e-25
MAFF	ENSG00000185022	protein_coding	-2.00604	6.13048	1.18e-26	9.8e-25
TACC2	ENSG00000138162	protein_coding	-1.89817	5.86736	1.22e-26	1.01e-24
AC004637.1	ENSG00000267304	antisense	-3.56748	-3.49724	1.4e-26	1.15e-24
AC025259.3	ENSG00000259884	lincRNA	-2.88827	0.00651272	1.72e-26	1.41e-24
ITGA9	ENSG00000144668	protein_coding	-2.30497	3.49606	1.84e-26	1.51e-24
ADAM33	ENSG00000149451	protein_coding	-3.13114	2.94506	1.89e-26	1.54e-24
PDLIM3	ENSG00000154553	protein_coding	-3.1492	5.69102	1.99e-26	1.62e-24
AARD	ENSG00000205002	protein_coding	-4.05098	0.350248	2.01e-26	1.64e-24
AC121758.1	ENSG00000258679	transcribed_processed_pseudogene	-3.23151	-3.522	2.18e-26	1.76e-24
ANKS1B	ENSG00000185046	protein_coding	-3.28925	-0.280717	2.33e-26	1.89e-24
EBF1	ENSG00000164330	protein_coding	-2.51346	2.62869	2.34e-26	1.89e-24
PLCB4	ENSG00000101333	protein_coding	-3.00033	2.98142	2.37e-26	1.91e-24
AC027449.1	ENSG00000273348	lincRNA	-3.83705	-3.3795	2.44e-26	1.96e-24
HIPK3	ENSG00000110422	protein_coding	-1.54894	6.03941	2.55e-26	2.04e-24
FAM135B	ENSG00000147724	protein_coding	-4.19462	-1.97448	2.71e-26	2.16e-24
JAZF1-AS1	ENSG00000234336	antisense	-3.08974	-2.79905	2.87e-26	2.28e-24
MIR221	ENSG00000207870	miRNA	-3.27735	-2.53734	3.37e-26	2.68e-24
FBXO30	ENSG00000118496	protein_coding	-1.43442	4.15135	3.4e-26	2.7e-24
KCNIP4	ENSG00000185774	protein_coding	-1.73651	0.303517	3.73e-26	2.95e-24
DDR2	ENSG00000162733	protein_coding	-2.72813	4.69286	4.04e-26	3.19e-24
LINC01154	ENSG00000257477	lincRNA	-3.99041	-3.91734	4.1e-26	3.23e-24
SPEG	ENSG00000072195	protein_coding	-3.10984	4.30652	4.17e-26	3.27e-24
KLF4	ENSG00000136826	protein_coding	-2.38518	5.73123	4.62e-26	3.62e-24
ZFPM2	ENSG00000169946	protein_coding	-2.72538	2.1899	4.7e-26	3.66e-24
PARD3B	ENSG00000116117	protein_coding	-2.32578	3.02658	4.7e-26	3.66e-24
AC079313.1	ENSG00000258086	antisense	-3.05546	-2.45966	4.74e-26	3.69e-24
TSPAN18	ENSG00000157570	protein_coding	-2.57217	4.0136	4.92e-26	3.82e-24
BCL2L2	ENSG00000129473	protein_coding	-1.43861	5.51312	5.07e-26	3.93e-24
JUN	ENSG00000177606	protein_coding	-2.12106	8.06967	5.65e-26	4.37e-24
WFDC1	ENSG00000103175	protein_coding	-2.55895	3.87436	5.82e-26	4.48e-24
LINC02202	ENSG00000245812	lincRNA	-2.6241	-1.02083	7.06e-26	5.43e-24
STON1-GTF2A1L	ENSG00000068781	protein_coding	-3.48106	-2.28629	7.99e-26	6.13e-24
CC2D2A	ENSG00000048342	protein_coding	-1.70255	3.45469	8.79e-26	6.73e-24
LINC01797	ENSG00000237179	lincRNA	-3.87464	-3.90821	9.06e-26	6.92e-24
ATP1B2	ENSG00000129244	protein_coding	-2.47393	0.907602	9.5e-26	7.23e-24
HSPB8	ENSG00000152137	protein_coding	-3.10938	6.34225	9.51e-26	7.23e-24
RERG	ENSG00000134533	protein_coding	-2.66753	2.42262	1.01e-25	7.62e-24
ITGA1	ENSG00000213949	protein_coding	-2.13701	5.59123	1.47e-25	1.11e-23
NFIL3	ENSG00000165030	protein_coding	-1.9532	5.14026	1.56e-25	1.18e-23
TSPYL2	ENSG00000184205	protein_coding	-1.59089	4.86356	1.62e-25	1.22e-23
MFAP4	ENSG00000166482	protein_coding	-3.08978	6.35279	1.62e-25	1.22e-23
DUSP3	ENSG00000108861	protein_coding	-1.38362	6.16754	1.74e-25	1.3e-23
AF186192.2	ENSG00000255085	transcribed_unprocessed_pseudogene	-3.28899	-2.38705	1.82e-25	1.36e-23
ZBTB4	ENSG00000174282	protein_coding	-1.22777	6.45971	1.83e-25	1.37e-23
LRRN4CL	ENSG00000177363	protein_coding	-2.69443	1.68327	1.92e-25	1.43e-23
CTD-2270F17.1	ENSG00000253647	antisense	-3.6853	-3.76249	2.02e-25	1.5e-23
AP000911.1	ENSG00000204241	lincRNA	-2.93796	-1.79339	2.24e-25	1.66e-23
DLG2	ENSG00000150672	protein_coding	-2.52612	0.785711	2.29e-25	1.69e-23
SAMD4A	ENSG00000020577	protein_coding	-2.28463	4.04681	2.46e-25	1.82e-23
AC092376.2	ENSG00000277954	antisense	-2.92227	-0.804971	2.57e-25	1.89e-23
WEE1	ENSG00000166483	protein_coding	-1.69401	5.98171	2.64e-25	1.94e-23
COL14A1	ENSG00000187955	protein_coding	-2.83955	5.6053	2.74e-25	2.01e-23
PGM5-AS1	ENSG00000224958	antisense	-5.07158	1.49039	3.7e-25	2.71e-23
OSTN	ENSG00000188729	protein_coding	-4.99838	-1.37651	3.82e-25	2.79e-23
AC073862.5	ENSG00000280200	TEC	-3.88788	-3.64999	3.93e-25	2.86e-23
ASB5	ENSG00000164122	protein_coding	-5.01169	1.90743	4.2e-25	3.05e-23
LINC01352	ENSG00000238078	lincRNA	-3.12344	-2.77187	5.39e-25	3.91e-23
WBSCR17	ENSG00000185274	protein_coding	-3.49383	2.00509	5.78e-25	4.18e-23
DES	ENSG00000175084	protein_coding	-4.40904	9.58397	5.84e-25	4.22e-23
SGCD	ENSG00000170624	protein_coding	-3.21931	2.81984	6.03e-25	4.35e-23
RGS5	ENSG00000143248	protein_coding	-2.5182	6.76308	6.16e-25	4.43e-23
TPRG1	ENSG00000188001	protein_coding	-2.69173	2.36421	7.31e-25	5.24e-23
CHRM2	ENSG00000181072	protein_coding	-4.31183	1.96862	7.83e-25	5.61e-23
SH3D19	ENSG00000109686	protein_coding	-1.5319	5.5354	8.32e-25	5.94e-23
RD3L	ENSG00000227729	protein_coding	-5.32717	-4.08993	8.37e-25	5.96e-23
FAIM2	ENSG00000135472	protein_coding	-3.42035	1.14366	1.04e-24	7.42e-23
AC098798.1	ENSG00000250511	antisense	-3.59656	-3.82037	1.09e-24	7.72e-23
PMP2	ENSG00000147588	protein_coding	-3.97474	-1.55855	1.2e-24	8.46e-23
TIPARP	ENSG00000163659	protein_coding	-1.9442	5.6076	1.27e-24	8.93e-23
CPEB4	ENSG00000113742	protein_coding	-1.71552	4.67248	1.31e-24	9.25e-23
CCDC136	ENSG00000128596	protein_coding	-2.41102	1.88659	1.38e-24	9.69e-23
AC009102.2	ENSG00000272372	antisense	-3.80021	-3.68827	1.66e-24	1.17e-22
SGCG	ENSG00000102683	protein_coding	-3.8739	-1.17473	1.83e-24	1.28e-22
NFIA	ENSG00000162599	protein_coding	-1.97762	5.17711	1.88e-24	1.31e-22
LINC01081	ENSG00000268754	lincRNA	-3.67863	-3.37442	1.93e-24	1.35e-22
LDB3	ENSG00000122367	protein_coding	-2.81589	1.40935	2.73e-24	1.9e-22
TBX5	ENSG00000089225	protein_coding	-2.93955	1.15647	2.98e-24	2.07e-22
CEP85L	ENSG00000111860	protein_coding	-1.72467	2.61636	3.1e-24	2.14e-22
MYOT	ENSG00000120729	protein_coding	-2.69241	-0.704698	3.18e-24	2.2e-22
HAAO	ENSG00000162882	protein_coding	-2.24825	2.46919	3.29e-24	2.27e-22
AL160408.3	ENSG00000230628	lincRNA	-3.46585	-3.01489	3.78e-24	2.6e-22
FAT4	ENSG00000196159	protein_coding	-2.48446	2.61123	4.08e-24	2.8e-22
KRT4	ENSG00000170477	protein_coding	-4.76488	8.10586	4.27e-24	2.93e-22
HAND2	ENSG00000164107	protein_coding	-3.35009	2.15924	5.12e-24	3.5e-22
OSBPL10	ENSG00000144645	protein_coding	-1.96013	4.74031	5.45e-24	3.72e-22
AC093010.3	ENSG00000259976	3prime_overlapping_ncRNA	-1.75124	3.10814	5.63e-24	3.84e-22
HSD17B6	ENSG00000025423	protein_coding	-2.61187	2.6549	5.71e-24	3.89e-22
LINC01798	ENSG00000232046	lincRNA	-2.53114	-2.53635	6.08e-24	4.13e-22
THSD4	ENSG00000187720	protein_coding	-2.21691	4.56431	6.71e-24	4.54e-22
ARHGEF9	ENSG00000131089	protein_coding	-1.41148	4.31874	6.75e-24	4.56e-22
TGFB1I1	ENSG00000140682	protein_coding	-2.24282	5.2918	7.1e-24	4.79e-22
PLA2G5	ENSG00000127472	protein_coding	-3.13718	1.28261	7.29e-24	4.9e-22
AC067750.1	ENSG00000272631	antisense	-1.68051	0.578068	7.6e-24	5.1e-22
C7	ENSG00000112936	protein_coding	-3.97636	4.79915	7.67e-24	5.14e-22
AC073862.3	ENSG00000279940	TEC	-4.25639	-4.03852	8.65e-24	5.78e-22
MIR100HG	ENSG00000255248	processed_transcript	-2.91546	3.3399	9.21e-24	6.14e-22
SOCS3	ENSG00000184557	protein_coding	-2.3066	7.27599	9.52e-24	6.34e-22
ZHX3	ENSG00000174306	protein_coding	-1.40219	4.55037	1.09e-23	7.27e-22
MBNL1	ENSG00000152601	protein_coding	-1.25097	6.83605	1.19e-23	7.91e-22
AC011472.4	ENSG00000273733	antisense	-2.42936	-1.54291	1.2e-23	7.94e-22
ZBTB47	ENSG00000114853	protein_coding	-1.43373	4.3462	1.29e-23	8.53e-22
MIR133A1HG	ENSG00000265142	antisense	-3.39931	-2.38296	1.31e-23	8.64e-22
LAMC3	ENSG00000050555	protein_coding	-2.43848	4.01401	1.41e-23	9.29e-22
CDKL1	ENSG00000100490	protein_coding	-1.88428	0.404503	1.41e-23	9.29e-22
LINC00908	ENSG00000263812	lincRNA	-2.83008	-1.91588	1.46e-23	9.6e-22
FOXP2	ENSG00000128573	protein_coding	-3.01418	2.40947	1.56e-23	1.02e-21
RERGL	ENSG00000111404	protein_coding	-3.44865	-0.704203	1.59e-23	1.04e-21
FAM46B	ENSG00000158246	protein_coding	-3.06755	3.58408	1.7e-23	1.11e-21
ACTA2-AS1	ENSG00000180139	antisense	-2.90425	1.19625	1.8e-23	1.17e-21
AL139220.2	ENSG00000230615	lincRNA	-2.54282	0.854414	1.83e-23	1.19e-21
PER1	ENSG00000179094	protein_coding	-2.05053	5.79679	1.86e-23	1.2e-21
HSPG2	ENSG00000142798	protein_coding	-2.07796	7.67949	1.93e-23	1.25e-21
FBLN5	ENSG00000140092	protein_coding	-2.39309	4.67879	2.04e-23	1.32e-21
AKAP12	ENSG00000131016	protein_coding	-2.61988	5.66555	2.05e-23	1.32e-21
CPEB2	ENSG00000137449	protein_coding	-1.81216	3.82238	2.18e-23	1.4e-21
ADGRA2	ENSG00000020181	protein_coding	-2.34684	5.10066	2.25e-23	1.44e-21
ATP2B4	ENSG00000058668	protein_coding	-1.99078	7.12789	2.32e-23	1.49e-21
AC134312.1	ENSG00000205037	lincRNA	-3.30138	-2.56749	2.69e-23	1.72e-21
AC018521.6	ENSG00000266601	antisense	-1.73402	-1.54006	2.89e-23	1.84e-21
PPM1L	ENSG00000163590	protein_coding	-2.10589	4.7078	3.19e-23	2.03e-21
ACOX2	ENSG00000168306	protein_coding	-2.70559	1.31469	3.2e-23	2.03e-21
SMOC2	ENSG00000112562	protein_coding	-2.93222	5.18509	3.24e-23	2.05e-21
C1QTNF9	ENSG00000240654	protein_coding	-3.51691	-2.68742	3.48e-23	2.2e-21
LINC00865	ENSG00000232229	lincRNA	-2.29753	2.80451	3.49e-23	2.2e-21
TMEM100	ENSG00000166292	protein_coding	-3.17348	0.666022	3.88e-23	2.45e-21
EPHA3	ENSG00000044524	protein_coding	-2.64227	2.95588	4.09e-23	2.57e-21
GYS2	ENSG00000111713	protein_coding	-3.25895	-2.38436	4.12e-23	2.58e-21
NCALD	ENSG00000104490	protein_coding	-2.25231	3.41511	4.21e-23	2.64e-21
MCAM	ENSG00000076706	protein_coding	-1.95744	6.75446	4.71e-23	2.95e-21
ITGA5	ENSG00000161638	protein_coding	-2.46424	7.5207	5.26e-23	3.28e-21
ZNF25	ENSG00000175395	protein_coding	-1.33789	3.08486	5.91e-23	3.68e-21
PPP3CB	ENSG00000107758	protein_coding	-1.12443	5.51814	6.18e-23	3.85e-21
STK40	ENSG00000196182	protein_coding	-1.30025	5.66878	6.26e-23	3.89e-21
KLK13	ENSG00000167759	protein_coding	-4.85622	2.82659	6.54e-23	4.05e-21
JAZF1	ENSG00000153814	protein_coding	-2.02364	3.43027	6.84e-23	4.23e-21
DGKB	ENSG00000136267	protein_coding	-3.87875	-0.258502	8e-23	4.94e-21
TOR1AIP1	ENSG00000143337	protein_coding	-1.12375	5.74345	8.97e-23	5.53e-21
CCSER2	ENSG00000107771	protein_coding	-1.24341	5.24376	9.6e-23	5.9e-21
NCAM1	ENSG00000149294	protein_coding	-3.64303	3.91646	1.02e-22	6.24e-21
MUC22	ENSG00000261272	protein_coding	-4.94105	-0.273245	1.02e-22	6.26e-21
VSTM2A	ENSG00000170419	protein_coding	-4.47147	-1.0271	1.05e-22	6.4e-21
RASA3-IT1	ENSG00000232487	sense_intronic	-4.31342	-3.87828	1.08e-22	6.59e-21
FGF10	ENSG00000070193	protein_coding	-3.8856	-0.253636	1.11e-22	6.77e-21
CLIC4	ENSG00000169504	protein_coding	-2.16445	7.22559	1.36e-22	8.26e-21
MYZAP	ENSG00000263155	protein_coding	-2.42827	3.34351	1.59e-22	9.66e-21
IKZF4	ENSG00000123411	protein_coding	-1.39375	3.22467	1.69e-22	1.02e-20
ESR1	ENSG00000091831	protein_coding	-2.90868	2.75361	1.74e-22	1.05e-20
ADRB3	ENSG00000188778	protein_coding	-3.71786	-0.351336	1.84e-22	1.11e-20
TNNT2	ENSG00000118194	protein_coding	-3.01012	2.77231	1.87e-22	1.13e-20
SNRK	ENSG00000163788	protein_coding	-1.09519	4.88172	1.96e-22	1.18e-20
DCHS1	ENSG00000166341	protein_coding	-2.21484	4.35191	2.02e-22	1.21e-20
AC053503.6	ENSG00000280323	TEC	-4.48621	-0.124336	2.03e-22	1.22e-20
AL445426.1	ENSG00000231246	lincRNA	-3.08866	-3.34451	2.11e-22	1.26e-20
KRT78	ENSG00000170423	protein_coding	-3.71364	2.00951	2.19e-22	1.3e-20
KLHL15	ENSG00000174010	protein_coding	-1.3812	3.13619	2.19e-22	1.31e-20
SOX5	ENSG00000134532	protein_coding	-2.36786	0.255331	2.48e-22	1.48e-20
AC007671.1	ENSG00000274624	sense_intronic	-3.12434	-3.23234	2.51e-22	1.49e-20
MMP27	ENSG00000137675	protein_coding	-4.1116	-3.96826	2.75e-22	1.63e-20
AL133410.3	ENSG00000281205	lincRNA	-2.39331	-0.144913	2.93e-22	1.73e-20
EPHB1	ENSG00000154928	protein_coding	-2.9052	1.21476	3.41e-22	2.01e-20
TRIB1	ENSG00000173334	protein_coding	-1.79324	6.90959	4.03e-22	2.38e-20
MEN1	ENSG00000133895	protein_coding	1.25334	5.91391	4.15e-22	2.44e-20
EPHA7	ENSG00000135333	protein_coding	-3.2247	2.57591	4.24e-22	2.49e-20
ADAMTS8	ENSG00000134917	protein_coding	-3.07879	1.60822	4.4e-22	2.58e-20
MAGI2	ENSG00000187391	protein_coding	-1.92731	2.36125	4.92e-22	2.88e-20
LRCH2	ENSG00000130224	protein_coding	-2.55844	1.8624	5.29e-22	3.09e-20
AC025280.1	ENSG00000260859	sense_intronic	-3.622	-3.81824	5.39e-22	3.14e-20
DAAM2	ENSG00000146122	protein_coding	-2.28181	3.03279	5.41e-22	3.15e-20
MEIS1	ENSG00000143995	protein_coding	-1.74796	4.354	5.6e-22	3.26e-20
AC008676.2	ENSG00000251405	sense_overlapping	-2.99017	-1.15243	5.66e-22	3.28e-20
FZD7	ENSG00000155760	protein_coding	-1.98189	4.72671	6.06e-22	3.51e-20
TMEM220	ENSG00000187824	protein_coding	-2.11178	1.1141	6.14e-22	3.55e-20
TRPC3	ENSG00000138741	protein_coding	-2.78325	-0.197414	6.15e-22	3.55e-20
CHRM3	ENSG00000133019	protein_coding	-3.21112	2.77641	6.36e-22	3.66e-20
MLXIP	ENSG00000175727	protein_coding	-1.35154	6.57978	6.38e-22	3.67e-20
CDC42BPA	ENSG00000143776	protein_coding	-1.59135	5.60239	6.51e-22	3.74e-20
IL6ST	ENSG00000134352	protein_coding	-1.70498	6.41296	6.58e-22	3.77e-20
TCEAL7	ENSG00000182916	protein_coding	-2.52387	0.919699	7.73e-22	4.42e-20
AGTR1	ENSG00000144891	protein_coding	-3.35885	1.11252	7.82e-22	4.47e-20
CREBRF	ENSG00000164463	protein_coding	-1.27023	4.10731	8.72e-22	4.97e-20
SPOP	ENSG00000121067	protein_coding	-1.03935	5.79922	1.02e-21	5.8e-20
SSPN	ENSG00000123096	protein_coding	-1.90783	4.38799	1.08e-21	6.15e-20
JUNB	ENSG00000171223	protein_coding	-1.6718	8.66753	1.1e-21	6.23e-20
AL021408.1	ENSG00000236166	lincRNA	-3.13075	-3.66973	1.13e-21	6.38e-20
RUSC2	ENSG00000198853	protein_coding	-1.77314	4.57683	1.16e-21	6.56e-20
LEPR	ENSG00000116678	protein_coding	-2.08216	3.06116	1.2e-21	6.75e-20
AL669970.3	ENSG00000228877	lincRNA	-3.1632	-3.60896	1.28e-21	7.2e-20
SBDS	ENSG00000126524	protein_coding	-1.11645	6.13862	1.31e-21	7.34e-20
GPIHBP1	ENSG00000277494	protein_coding	-2.81818	0.947504	1.45e-21	8.11e-20
REV3L	ENSG00000009413	protein_coding	-1.52694	4.23062	1.46e-21	8.2e-20
DISP1	ENSG00000154309	protein_coding	-1.67615	2.72548	1.65e-21	9.23e-20
LRRK2	ENSG00000188906	protein_coding	-2.43975	2.20117	1.73e-21	9.65e-20
TSC22D1	ENSG00000102804	protein_coding	-1.60342	7.5939	1.75e-21	9.77e-20
PNRC1	ENSG00000146278	protein_coding	-1.46384	6.22911	1.78e-21	9.9e-20
ROR1	ENSG00000185483	protein_coding	-2.69051	1.72592	2.09e-21	1.16e-19
ABRA	ENSG00000174429	protein_coding	-2.86002	-2.76956	2.17e-21	1.2e-19
THRA	ENSG00000126351	protein_coding	-1.62028	4.91575	2.28e-21	1.26e-19
RNF112	ENSG00000128482	protein_coding	-2.37086	0.423734	2.3e-21	1.27e-19
TRAK2	ENSG00000115993	protein_coding	-1.26469	5.10307	2.44e-21	1.35e-19
FGF2	ENSG00000138685	protein_coding	-2.76055	2.55713	2.6e-21	1.43e-19
LRFN5	ENSG00000165379	protein_coding	-3.25821	1.14748	2.71e-21	1.49e-19
HPSE2	ENSG00000172987	protein_coding	-3.71464	2.4725	2.77e-21	1.52e-19
ABCC9	ENSG00000069431	protein_coding	-2.51209	2.50326	2.83e-21	1.55e-19
STAB2	ENSG00000136011	protein_coding	-2.71709	-1.19294	2.84e-21	1.55e-19
KLHL10	ENSG00000161594	protein_coding	-2.21307	-2.91165	3e-21	1.64e-19
MMRN1	ENSG00000138722	protein_coding	-3.03627	1.9163	3.1e-21	1.69e-19
NXPH3	ENSG00000182575	protein_coding	-2.69805	2.32846	3.17e-21	1.73e-19
SPRY1	ENSG00000164056	protein_coding	-1.92911	5.13137	3.53e-21	1.92e-19
CPXM2	ENSG00000121898	protein_coding	-2.89866	4.39205	3.73e-21	2.03e-19
IGSF10	ENSG00000152580	protein_coding	-3.56769	1.61721	3.89e-21	2.11e-19
HLX-AS1	ENSG00000257551	antisense	-3.17007	-3.88521	4.14e-21	2.24e-19
PTGIS	ENSG00000124212	protein_coding	-3.36274	5.60695	4.27e-21	2.31e-19
BVES	ENSG00000112276	protein_coding	-2.78742	2.74933	4.74e-21	2.55e-19
MAOB	ENSG00000069535	protein_coding	-3.18313	3.86609	4.79e-21	2.58e-19
OR8T1P	ENSG00000226413	unprocessed_pseudogene	-2.36686	-3.19202	4.81e-21	2.59e-19
BTG2	ENSG00000159388	protein_coding	-2.19039	8.30598	5.2e-21	2.79e-19
MBD5	ENSG00000204406	protein_coding	-1.13385	3.74001	5.21e-21	2.79e-19
MPDZ	ENSG00000107186	protein_coding	-1.75623	4.12148	5.8e-21	3.1e-19
AC079789.1	ENSG00000261672	lincRNA	-3.6354	-3.68668	6.09e-21	3.25e-19
NBEA	ENSG00000172915	protein_coding	-2.74184	2.9073	6.62e-21	3.53e-19
RUNX1T1	ENSG00000079102	protein_coding	-2.62952	1.61825	6.82e-21	3.63e-19
FAM13B	ENSG00000031003	protein_coding	-1.42795	4.64108	6.92e-21	3.67e-19
AC005225.5	ENSG00000279026	TEC	-2.03479	-1.27847	8.41e-21	4.46e-19
ZCWPW2	ENSG00000206559	protein_coding	-1.53661	-0.749968	8.67e-21	4.59e-19
CPNE6	ENSG00000100884	protein_coding	-3.72115	-1.24255	8.79e-21	4.65e-19
MTTP	ENSG00000138823	protein_coding	-3.02183	-1.24957	9.32e-21	4.92e-19
PELI2	ENSG00000139946	protein_coding	-2.29849	3.13152	9.99e-21	5.27e-19
STARD13	ENSG00000133121	protein_coding	-1.95611	3.76807	1.01e-20	5.31e-19
HAND1	ENSG00000113196	protein_coding	-4.48013	-0.0718171	1.13e-20	5.92e-19
CALCOCO1	ENSG00000012822	protein_coding	-1.10578	6.03321	1.2e-20	6.31e-19
AC120498.10	ENSG00000277010	antisense	-3.06236	-2.96448	1.21e-20	6.35e-19
AC091588.3	ENSG00000266283	antisense	-2.93261	-3.52978	1.33e-20	6.97e-19
INPP5A	ENSG00000068383	protein_coding	-1.32719	4.9504	1.38e-20	7.22e-19
AP001528.3	ENSG00000280339	TEC	-2.20134	0.12658	1.43e-20	7.46e-19
AC117489.1	ENSG00000278934	TEC	-3.25299	-1.14266	1.51e-20	7.85e-19
LINC00670	ENSG00000179136	lincRNA	-3.20579	-3.91844	1.52e-20	7.9e-19
GATA5	ENSG00000130700	protein_coding	-3.78179	0.968977	1.67e-20	8.69e-19
PCP4	ENSG00000183036	protein_coding	-4.20966	4.31253	1.81e-20	9.39e-19
LATS2	ENSG00000150457	protein_coding	-1.62424	4.41253	1.82e-20	9.41e-19
TCEAL1	ENSG00000172465	protein_coding	-1.45524	4.27959	1.85e-20	9.54e-19
A2M	ENSG00000175899	protein_coding	-2.24159	9.03299	1.89e-20	9.77e-19
HMGN2P19	ENSG00000229367	processed_pseudogene	-3.1833	-3.38761	1.99e-20	1.02e-18
XPNPEP2	ENSG00000122121	protein_coding	-3.65983	1.02231	2e-20	1.03e-18
ASTL	ENSG00000188886	protein_coding	-3.05245	-0.660881	2.02e-20	1.04e-18
MYADM	ENSG00000179820	protein_coding	-2.3387	6.69245	2.15e-20	1.1e-18
EBF2	ENSG00000221818	protein_coding	-2.58705	-0.0185392	2.22e-20	1.13e-18
GPBAR1	ENSG00000179921	protein_coding	-2.29097	0.661868	2.25e-20	1.15e-18
IL6	ENSG00000136244	protein_coding	-3.43734	3.94619	2.32e-20	1.18e-18
LINC01765	ENSG00000233730	lincRNA	-3.10273	-3.82324	2.33e-20	1.19e-18
MAPT	ENSG00000186868	protein_coding	-2.73722	2.32347	2.8e-20	1.42e-18
ELMSAN1	ENSG00000156030	protein_coding	-1.26494	5.1586	3.07e-20	1.56e-18
ANK2	ENSG00000145362	protein_coding	-2.9697	2.91637	3.25e-20	1.65e-18
ENDOU	ENSG00000111405	protein_coding	-3.5845	0.49591	3.31e-20	1.67e-18
PYGB	ENSG00000100994	protein_coding	-1.68858	7.60134	3.36e-20	1.7e-18
C5orf66-AS1	ENSG00000249082	lincRNA	-3.18268	-0.259442	3.49e-20	1.76e-18
MKX-AS1	ENSG00000230500	antisense	-4.28909	-3.48193	3.96e-20	2e-18
IGIP	ENSG00000182700	protein_coding	-1.2728	3.19537	4.19e-20	2.11e-18
KCNQ4	ENSG00000117013	protein_coding	-2.54018	1.28709	4.66e-20	2.34e-18
B3GALT2	ENSG00000162630	protein_coding	-2.89304	-1.2136	4.68e-20	2.35e-18
FRMD6-AS2	ENSG00000258537	lincRNA	-3.4718	-2.83812	4.69e-20	2.35e-18
NDNF	ENSG00000173376	protein_coding	-3.02132	1.29782	5e-20	2.5e-18
KIF18B	ENSG00000186185	protein_coding	2.89344	4.70553	5.37e-20	2.68e-18
KCTD10	ENSG00000110906	protein_coding	-0.972389	6.13883	5.43e-20	2.71e-18
OLFML1	ENSG00000183801	protein_coding	-2.21845	2.46949	6.32e-20	3.14e-18
RECK	ENSG00000122707	protein_coding	-2.01731	2.77827	6.58e-20	3.27e-18
HERC1	ENSG00000103657	protein_coding	-1.03091	5.4341	6.64e-20	3.29e-18
CAP2	ENSG00000112186	protein_coding	-2.19552	3.35993	7.13e-20	3.53e-18
RHCG	ENSG00000140519	protein_coding	-3.92241	6.61821	7.17e-20	3.55e-18
MEIS2	ENSG00000134138	protein_coding	-1.80884	4.2704	7.23e-20	3.57e-18
CNFN	ENSG00000105427	protein_coding	-3.15685	4.41866	7.42e-20	3.66e-18
CTNNA3	ENSG00000183230	protein_coding	-3.41021	0.09272	7.7e-20	3.79e-18
RXRG	ENSG00000143171	protein_coding	-3.46155	-1.6699	7.73e-20	3.8e-18
IL13	ENSG00000169194	protein_coding	-3.14585	-2.95479	8.02e-20	3.94e-18
CKS1BP1	ENSG00000258788	processed_pseudogene	-2.71434	-1.82086	8.1e-20	3.97e-18
BDKRB2	ENSG00000168398	protein_coding	-2.12807	4.25912	8.38e-20	4.1e-18
HIPK4	ENSG00000160396	protein_coding	-2.11864	-1.84877	8.39e-20	4.1e-18
ANXA6	ENSG00000197043	protein_coding	-2.27714	6.71105	8.66e-20	4.22e-18
SPRR3	ENSG00000163209	protein_coding	-3.71314	6.87777	8.8e-20	4.29e-18
MIDN	ENSG00000167470	protein_coding	-1.26162	7.14315	9.61e-20	4.67e-18
AL132642.1	ENSG00000258987	antisense	-3.3735	-3.38802	1.08e-19	5.23e-18
CLDN5	ENSG00000184113	protein_coding	-2.39128	3.95602	1.1e-19	5.34e-18
CACNB4	ENSG00000182389	protein_coding	-2.79101	1.43078	1.19e-19	5.76e-18
AMOTL1	ENSG00000166025	protein_coding	-1.91128	5.93489	1.2e-19	5.82e-18
AC093390.1	ENSG00000232057	antisense	-3.89559	-3.28269	1.24e-19	5.99e-18
AC005062.1	ENSG00000243004	sense_overlapping	-2.34737	-1.21248	1.35e-19	6.51e-18
AP003071.4	ENSG00000261625	sense_overlapping	-2.73627	-0.208912	1.51e-19	7.25e-18
AC008669.1	ENSG00000260686	sense_overlapping	-1.82976	0.34599	1.54e-19	7.41e-18
KCND3	ENSG00000171385	protein_coding	-2.77006	2.87938	1.59e-19	7.61e-18
CCL14	ENSG00000276409	protein_coding	-3.16381	0.224081	1.6e-19	7.65e-18
AL513217.1	ENSG00000223774	antisense	-2.73367	-2.02326	1.71e-19	8.17e-18
KCNAB1	ENSG00000169282	protein_coding	-1.65882	0.894016	1.74e-19	8.31e-18
AC108448.2	ENSG00000236710	processed_pseudogene	-2.40784	-2.83176	1.82e-19	8.68e-18
CIPC	ENSG00000198894	protein_coding	-1.16001	4.63241	1.82e-19	8.68e-18
RCC2	ENSG00000179051	protein_coding	1.28024	8.05154	1.82e-19	8.68e-18
ADCYAP1R1	ENSG00000078549	protein_coding	-2.96184	-0.636443	1.86e-19	8.83e-18
EME1	ENSG00000154920	protein_coding	2.62962	2.58318	1.89e-19	8.99e-18
MOAP1	ENSG00000165943	protein_coding	-1.08918	4.56688	1.91e-19	9.06e-18
AL365214.2	ENSG00000226440	antisense	-2.50758	-2.34934	2.09e-19	9.89e-18
PTCH1	ENSG00000185920	protein_coding	-1.61136	3.61282	2.13e-19	1e-17
GDF10	ENSG00000266524	protein_coding	-3.42545	-1.60681	2.18e-19	1.03e-17
LGI4	ENSG00000153902	protein_coding	-2.1961	2.27664	2.3e-19	1.08e-17
UGCG	ENSG00000148154	protein_coding	-1.45481	6.20255	2.56e-19	1.2e-17
KIAA1614	ENSG00000135835	protein_coding	-1.6697	1.89671	2.61e-19	1.23e-17
FAM19A2	ENSG00000198673	protein_coding	-1.77083	0.0197284	2.64e-19	1.24e-17
AC027807.2	ENSG00000274128	sense_intronic	-3.29555	-3.80628	2.69e-19	1.26e-17
SYNC	ENSG00000162520	protein_coding	-2.48594	1.18116	2.9e-19	1.36e-17
CREM	ENSG00000095794	protein_coding	-1.40186	4.43536	3.03e-19	1.42e-17
AL109955.1	ENSG00000218018	antisense	-2.13293	-1.88481	3.07e-19	1.43e-17
AC079630.1	ENSG00000225342	antisense	-2.58369	-1.96877	3.16e-19	1.47e-17
CYBRD1	ENSG00000071967	protein_coding	-2.20256	5.85168	3.17e-19	1.48e-17
SCN7A	ENSG00000136546	protein_coding	-3.74836	0.895097	3.33e-19	1.55e-17
GALNT15	ENSG00000131386	protein_coding	-2.74705	2.24177	3.9e-19	1.81e-17
AC021546.1	ENSG00000254041	antisense	-3.55517	-3.97063	3.96e-19	1.83e-17
SGCB	ENSG00000163069	protein_coding	-1.6417	4.86198	4.13e-19	1.91e-17
MKX	ENSG00000150051	protein_coding	-3.14835	0.710319	4.54e-19	2.1e-17
SNX9	ENSG00000130340	protein_coding	-1.05553	6.01283	4.76e-19	2.2e-17
MEF2C	ENSG00000081189	protein_coding	-1.89728	3.90089	4.98e-19	2.29e-17
SLIT2	ENSG00000145147	protein_coding	-2.77541	3.04585	5.15e-19	2.37e-17
GFRA1	ENSG00000151892	protein_coding	-3.17331	2.00776	5.21e-19	2.39e-17
XRCC2	ENSG00000196584	protein_coding	2.40352	3.05299	5.27e-19	2.42e-17
TROAP	ENSG00000135451	protein_coding	2.69979	4.88161	5.34e-19	2.45e-17
TTLL7	ENSG00000137941	protein_coding	-2.26082	3.19838	5.5e-19	2.52e-17
RBMS3	ENSG00000144642	protein_coding	-2.25193	2.99043	5.53e-19	2.53e-17
AC020916.1	ENSG00000267519	lincRNA	-1.91973	4.70405	5.63e-19	2.57e-17
AC004803.1	ENSG00000250132	antisense	-1.56995	0.879191	5.66e-19	2.58e-17
AC107959.1	ENSG00000245025	antisense	-1.76253	-1.00549	5.9e-19	2.68e-17
DNAJC18	ENSG00000170464	protein_coding	-1.38532	2.70196	6.38e-19	2.89e-17
HJURP	ENSG00000123485	protein_coding	2.54111	4.58202	6.38e-19	2.89e-17
KANK1	ENSG00000107104	protein_coding	-1.71291	5.98332	6.98e-19	3.16e-17
RBM24	ENSG00000112183	protein_coding	-3.08102	0.979655	7.03e-19	3.18e-17
CRTAP	ENSG00000170275	protein_coding	-1.1986	7.2421	7.76e-19	3.51e-17
GPR135	ENSG00000181619	protein_coding	-1.80428	0.468301	7.9e-19	3.56e-17
TGFBR3	ENSG00000069702	protein_coding	-2.15886	5.55068	8.06e-19	3.63e-17
DUSP5	ENSG00000138166	protein_coding	-2.19607	6.56652	8.46e-19	3.8e-17
EIF2AK1	ENSG00000086232	protein_coding	1.03821	7.60735	8.77e-19	3.94e-17
ROCK1	ENSG00000067900	protein_coding	-1.27143	5.72561	8.92e-19	4e-17
PIP5K1C	ENSG00000186111	protein_coding	-0.893276	6.05216	9.11e-19	4.08e-17
ARHGAP39	ENSG00000147799	protein_coding	1.73782	4.07523	9.76e-19	4.37e-17
C16orf45	ENSG00000166780	protein_coding	-2.09179	3.84934	1.01e-18	4.49e-17
AC016769.1	ENSG00000213642	processed_pseudogene	-3.09517	-3.27314	1.02e-18	4.57e-17
AC008676.1	ENSG00000248544	antisense	-2.44754	-1.86214	1.05e-18	4.7e-17
NPR2	ENSG00000159899	protein_coding	-1.65384	2.76469	1.06e-18	4.73e-17
DGKG	ENSG00000058866	protein_coding	-2.49409	1.91514	1.13e-18	5.01e-17
ARHGAP10	ENSG00000071205	protein_coding	-1.47642	4.97835	1.15e-18	5.11e-17
GFRA2	ENSG00000168546	protein_coding	-2.45364	0.195775	1.16e-18	5.15e-17
ADRA1D	ENSG00000171873	protein_coding	-2.83393	-0.96002	1.18e-18	5.2e-17
AL353804.1	ENSG00000228906	lincRNA	-1.77253	-1.85602	1.22e-18	5.38e-17
MAGI2-AS3	ENSG00000234456	processed_transcript	-2.13935	2.78931	1.25e-18	5.51e-17
KLF17	ENSG00000171872	protein_coding	-3.63938	-1.48384	1.28e-18	5.64e-17
CRTC3	ENSG00000140577	protein_coding	-0.903805	5.40936	1.32e-18	5.8e-17
NKX6-2	ENSG00000148826	protein_coding	-3.10016	-3.8805	1.33e-18	5.82e-17
NLGN1	ENSG00000169760	protein_coding	-2.97582	0.651694	1.33e-18	5.82e-17
AC007495.1	ENSG00000246379	lincRNA	-3.22037	-3.02872	1.35e-18	5.92e-17
AL356123.1	ENSG00000203688	lincRNA	-3.30441	-2.97255	1.41e-18	6.18e-17
TMEM35A	ENSG00000126950	protein_coding	-3.26135	1.74879	1.45e-18	6.34e-17
CASP2	ENSG00000106144	protein_coding	1.22963	5.82249	1.46e-18	6.36e-17
SCN4B	ENSG00000177098	protein_coding	-2.24062	1.8083	1.47e-18	6.42e-17
CDK1	ENSG00000170312	protein_coding	2.35999	5.84362	1.49e-18	6.51e-17
AC104123.1	ENSG00000251314	antisense	-2.34611	-3.25873	1.52e-18	6.59e-17
MASP1	ENSG00000127241	protein_coding	-2.88698	1.17823	1.61e-18	6.97e-17
AL163636.2	ENSG00000259171	protein_coding	-2.372	-3.0628	1.73e-18	7.51e-17
UHRF1	ENSG00000276043	protein_coding	2.493	4.75678	1.98e-18	8.59e-17
RPS6KA2	ENSG00000071242	protein_coding	-1.64367	4.81339	2.2e-18	9.5e-17
DENND5A	ENSG00000184014	protein_coding	-1.31251	5.44105	2.21e-18	9.56e-17
ENPP6	ENSG00000164303	protein_coding	-2.75204	-0.637105	2.27e-18	9.8e-17
AL136366.1	ENSG00000225472	antisense	-3.29707	-2.66589	2.28e-18	9.83e-17
AC106881.1	ENSG00000271474	antisense	-2.64478	-1.27438	2.31e-18	9.93e-17
ADD1	ENSG00000087274	protein_coding	-0.848792	7.78787	2.31e-18	9.94e-17
BCHE	ENSG00000114200	protein_coding	-3.23728	1.86508	2.35e-18	1.01e-16
SMPX	ENSG00000091482	protein_coding	-3.41502	-0.765501	2.39e-18	1.02e-16
AC106739.1	ENSG00000274092	antisense	-2.13198	-1.62798	2.54e-18	1.09e-16
F8	ENSG00000185010	protein_coding	-1.74809	2.7584	2.61e-18	1.12e-16
PTH1R	ENSG00000160801	protein_coding	-2.35567	0.553086	2.84e-18	1.21e-16
SERINC1	ENSG00000111897	protein_coding	-1.10516	6.96441	2.88e-18	1.23e-16
PDZD4	ENSG00000067840	protein_coding	-2.68859	2.00642	3.01e-18	1.28e-16
RN7SL689P	ENSG00000263432	misc_RNA	-1.75832	-1.24289	3.21e-18	1.37e-16
MOGS	ENSG00000115275	protein_coding	1.19059	6.72045	3.36e-18	1.43e-16
AC016769.3	ENSG00000235349	processed_pseudogene	-3.19503	-3.31585	3.39e-18	1.44e-16
RBPMS	ENSG00000157110	protein_coding	-1.71831	6.32657	3.57e-18	1.51e-16
AC116021.2	ENSG00000255007	antisense	-3.30711	-3.07927	3.57e-18	1.51e-16
GRASP	ENSG00000161835	protein_coding	-1.87138	3.19881	4.07e-18	1.72e-16
ABCB5	ENSG00000004846	protein_coding	-3.60485	-2.01712	4.18e-18	1.77e-16
RUNDC3B	ENSG00000105784	protein_coding	-1.94608	0.128559	4.2e-18	1.77e-16
TBX4	ENSG00000121075	protein_coding	-2.99815	1.75612	4.29e-18	1.81e-16
KLF6	ENSG00000067082	protein_coding	-1.5469	7.8248	4.49e-18	1.89e-16
SYNPO	ENSG00000171992	protein_coding	-1.76746	6.22288	4.5e-18	1.89e-16
NFIC	ENSG00000141905	protein_coding	-1.36835	6.41975	4.66e-18	1.95e-16
RNASE4	ENSG00000258818	protein_coding	-1.91333	0.0864021	4.77e-18	2e-16
SYPL2	ENSG00000143028	protein_coding	-2.58358	0.528263	4.78e-18	2e-16
LRCH1	ENSG00000136141	protein_coding	-1.20293	4.38731	5.42e-18	2.26e-16
C1QTNF2	ENSG00000145861	protein_coding	-2.12348	0.678037	5.48e-18	2.29e-16
BMP5	ENSG00000112175	protein_coding	-3.32106	1.69059	5.56e-18	2.32e-16
DENND2A	ENSG00000146966	protein_coding	-2.02399	3.18631	5.76e-18	2.4e-16
SCUBE1	ENSG00000159307	protein_coding	-2.5359	1.09171	5.79e-18	2.41e-16
NAP1L5	ENSG00000177432	protein_coding	-1.62662	2.40605	5.86e-18	2.43e-16
GTSE1	ENSG00000075218	protein_coding	2.42602	4.26166	6.23e-18	2.58e-16
AURKA	ENSG00000087586	protein_coding	2.42036	5.07504	6.38e-18	2.64e-16
LRRFIP1	ENSG00000124831	protein_coding	-1.12331	7.11375	6.97e-18	2.88e-16
PTBP2	ENSG00000117569	protein_coding	-1.19321	3.9892	7.43e-18	3.07e-16
KIF2C	ENSG00000142945	protein_coding	2.42368	5.55825	7.6e-18	3.14e-16
NEK1	ENSG00000137601	protein_coding	-1.15569	3.58199	7.66e-18	3.16e-16
WNT2B	ENSG00000134245	protein_coding	-1.74559	2.23499	7.67e-18	3.16e-16
UBE2C	ENSG00000175063	protein_coding	2.67143	6.39473	8.16e-18	3.35e-16
EID1	ENSG00000255302	protein_coding	-0.949125	6.82053	8.19e-18	3.36e-16
PRIMA1	ENSG00000175785	protein_coding	-3.14641	1.0338	8.41e-18	3.45e-16
FBXO31	ENSG00000103264	protein_coding	-0.999173	4.94967	8.54e-18	3.5e-16
AL356599.1	ENSG00000235652	antisense	-1.52333	0.274176	8.72e-18	3.57e-16
ZEB2	ENSG00000169554	protein_coding	-2.00007	4.51102	8.84e-18	3.61e-16
SH3BGRL	ENSG00000131171	protein_coding	-1.46436	6.49345	8.94e-18	3.65e-16
HMGB3	ENSG00000029993	protein_coding	2.0389	6.67506	9.24e-18	3.76e-16
PRKAA2	ENSG00000162409	protein_coding	-2.69016	1.97093	9.46e-18	3.85e-16
ADGRB3	ENSG00000135298	protein_coding	-3.2056	0.0320811	9.49e-18	3.86e-16
RASGRP2	ENSG00000068831	protein_coding	-2.34033	2.70698	9.95e-18	4.04e-16
PPP1R3B	ENSG00000173281	protein_coding	-1.68451	5.22709	1.03e-17	4.17e-16
FBXL6	ENSG00000182325	protein_coding	1.75395	5.1931	1.06e-17	4.27e-16
LYPLAL1-AS1	ENSG00000228063	antisense	-2.77182	-3.07342	1.07e-17	4.32e-16
LINC02268	ENSG00000248174	lincRNA	-3.135	-3.07481	1.09e-17	4.39e-16
AC040170.1	ENSG00000270058	lincRNA	-2.46695	-1.81288	1.1e-17	4.45e-16
KIAA1462	ENSG00000165757	protein_coding	-2.05684	5.10586	1.17e-17	4.69e-16
HGH1	ENSG00000235173	protein_coding	1.45805	5.50008	1.18e-17	4.75e-16
BMPR1A	ENSG00000107779	protein_coding	-0.995458	4.71299	1.18e-17	4.75e-16
ZWINT	ENSG00000122952	protein_coding	2.25792	5.64181	1.23e-17	4.94e-16
CD55	ENSG00000196352	protein_coding	-1.9134	6.85604	1.24e-17	4.96e-16
XKR4	ENSG00000206579	protein_coding	-3.55911	-1.115	1.33e-17	5.34e-16
PRRG3	ENSG00000130032	protein_coding	-2.86484	-0.374789	1.37e-17	5.49e-16
C21orf58	ENSG00000160298	protein_coding	2.49803	3.60482	1.39e-17	5.56e-16
AL513122.2	ENSG00000239593	antisense	-3.00288	-3.8234	1.58e-17	6.32e-16
DCN	ENSG00000011465	protein_coding	-2.57361	8.35216	1.63e-17	6.49e-16
FANCA	ENSG00000187741	protein_coding	2.14061	4.47443	1.64e-17	6.53e-16
BDKRB1	ENSG00000100739	protein_coding	-2.4955	1.72675	1.7e-17	6.74e-16
DNM1P46	ENSG00000182397	transcribed_unprocessed_pseudogene	-2.78636	-3.01231	1.7e-17	6.76e-16
CD302	ENSG00000241399	protein_coding	-1.63735	1.62522	1.73e-17	6.85e-16
TONSL	ENSG00000160949	protein_coding	1.79636	5.29657	1.84e-17	7.3e-16
CYP2A6	ENSG00000255974	protein_coding	-3.88859	-0.459317	2.05e-17	8.1e-16
AL355377.2	ENSG00000279489	TEC	-2.65962	-3.44515	2.05e-17	8.1e-16
AC005041.2	ENSG00000272183	antisense	2.66067	-0.710302	2.14e-17	8.43e-16
TNFAIP8L3	ENSG00000183578	protein_coding	-2.45797	2.2339	2.14e-17	8.43e-16
ANGPTL1	ENSG00000116194	protein_coding	-3.14295	2.13137	2.19e-17	8.62e-16
AC079907.2	ENSG00000258308	lincRNA	-3.1418	-3.96112	2.27e-17	8.91e-16
PLIN4	ENSG00000167676	protein_coding	-2.54402	5.2084	2.34e-17	9.18e-16
CD300LG	ENSG00000161649	protein_coding	-3.38945	-1.25173	2.58e-17	1.01e-15
ABLIM1	ENSG00000099204	protein_coding	-1.63168	6.71954	2.62e-17	1.03e-15
ACKR1	ENSG00000213088	protein_coding	-3.05278	4.42472	2.62e-17	1.03e-15
SETD7	ENSG00000145391	protein_coding	-1.27844	5.92971	2.62e-17	1.03e-15
FAM172A	ENSG00000113391	protein_coding	-1.07408	3.98607	2.74e-17	1.07e-15
HIF3A	ENSG00000124440	protein_coding	-3.13033	2.3669	2.79e-17	1.09e-15
CDCA8	ENSG00000134690	protein_coding	2.38771	5.01528	2.85e-17	1.11e-15
LINC02078	ENSG00000267719	lincRNA	-2.63642	-3.65169	3.39e-17	1.32e-15
NHSL2	ENSG00000204131	protein_coding	-2.47265	0.0104314	3.66e-17	1.42e-15
NOVA1	ENSG00000139910	protein_coding	-2.74808	1.03542	3.79e-17	1.47e-15
MIR1-1HG	ENSG00000174407	antisense	-3.60767	-4.01331	3.81e-17	1.48e-15
CNST	ENSG00000162852	protein_coding	-0.976233	4.50484	3.96e-17	1.53e-15
ACER1	ENSG00000167769	protein_coding	-3.40208	-2.49365	4.07e-17	1.57e-15
AC026691.1	ENSG00000270021	antisense	-1.52687	-0.521211	4.19e-17	1.62e-15
DPT	ENSG00000143196	protein_coding	-3.39862	4.00418	4.2e-17	1.62e-15
SERTAD1	ENSG00000197019	protein_coding	-1.38101	5.05102	4.4e-17	1.7e-15
RASL11A	ENSG00000122035	protein_coding	-2.17475	2.94426	4.6e-17	1.77e-15
DCHS2	ENSG00000197410	protein_coding	-3.09366	-0.436881	4.8e-17	1.84e-15
AC110491.1	ENSG00000261292	lincRNA	-3.69912	-2.46195	4.84e-17	1.86e-15
AC106789.1	ENSG00000251628	lincRNA	-4.43441	-3.68261	5.26e-17	2.02e-15
AC002398.2	ENSG00000267328	antisense	-3.65164	-2.52094	5.46e-17	2.09e-15
AKAP2	ENSG00000241978	protein_coding	-2.66975	-1.35382	5.5e-17	2.11e-15
STIL	ENSG00000123473	protein_coding	2.22622	4.05604	5.6e-17	2.14e-15
DYNC1I1	ENSG00000158560	protein_coding	-2.37949	2.99327	5.8e-17	2.21e-15
BLM	ENSG00000197299	protein_coding	1.86111	3.71948	6.08e-17	2.32e-15
AC012073.1	ENSG00000271936	antisense	2.18002	0.89542	6.11e-17	2.33e-15
ALG3	ENSG00000214160	protein_coding	1.26595	6.23559	6.33e-17	2.41e-15
SLC51B	ENSG00000186198	protein_coding	-2.37295	-1.45292	6.35e-17	2.41e-15
DUSP2	ENSG00000158050	protein_coding	-2.52896	5.55243	6.71e-17	2.55e-15
TSPAN2	ENSG00000134198	protein_coding	-2.39364	3.70574	6.97e-17	2.64e-15
GHR	ENSG00000112964	protein_coding	-2.4969	1.52607	7.12e-17	2.7e-15
TRIM63	ENSG00000158022	protein_coding	-3.28222	0.343992	7.35e-17	2.78e-15
ENTPD1	ENSG00000138185	protein_coding	-1.35547	5.5743	7.36e-17	2.78e-15
CYGB	ENSG00000161544	protein_coding	-1.85308	4.54061	7.74e-17	2.92e-15
BAG3	ENSG00000151929	protein_coding	-1.38183	6.47035	7.81e-17	2.94e-15
AC011472.1	ENSG00000267082	antisense	-1.70737	-0.603732	8.57e-17	3.23e-15
CASP12	ENSG00000204403	polymorphic_pseudogene	-2.19152	-2.40103	9.16e-17	3.45e-15
AKAP13	ENSG00000170776	protein_coding	-1.16548	6.48977	9.24e-17	3.47e-15
HSPB2	ENSG00000170276	protein_coding	-2.25283	-0.239675	9.29e-17	3.49e-15
MITF	ENSG00000187098	protein_coding	-1.98471	2.96279	9.33e-17	3.5e-15
PCDH18	ENSG00000189184	protein_coding	-2.00556	3.19182	9.43e-17	3.53e-15
MIR4786	ENSG00000264279	miRNA	-2.25236	-3.74295	9.45e-17	3.53e-15
PQLC2	ENSG00000040487	protein_coding	1.28313	4.56661	9.5e-17	3.55e-15
FHL5	ENSG00000112214	protein_coding	-2.35231	-0.0104372	9.99e-17	3.73e-15
CDC42EP3	ENSG00000163171	protein_coding	-1.68776	5.67476	1.01e-16	3.77e-15
PPP1R1A	ENSG00000135447	protein_coding	-3.22747	0.630334	1.04e-16	3.88e-15
SLC9A9	ENSG00000181804	protein_coding	-1.93536	3.04031	1.2e-16	4.46e-15
GREM2	ENSG00000180875	protein_coding	-3.09706	1.11393	1.27e-16	4.73e-15
BIN1	ENSG00000136717	protein_coding	-2.12694	5.07755	1.28e-16	4.74e-15
AC087457.1	ENSG00000250007	antisense	-3.83989	-3.96817	1.29e-16	4.77e-15
DIP2C	ENSG00000151240	protein_coding	-1.35477	4.77923	1.3e-16	4.82e-15
ABCD2	ENSG00000173208	protein_coding	-2.53442	-0.34487	1.31e-16	4.84e-15
ARHGAP24	ENSG00000138639	protein_coding	-1.92114	2.77104	1.31e-16	4.84e-15
INMT	ENSG00000241644	protein_coding	-2.14966	2.24633	1.36e-16	5.01e-15
SLC26A6	ENSG00000225697	protein_coding	1.92838	4.60044	1.38e-16	5.07e-15
PHYHIP	ENSG00000168490	protein_coding	-2.661	2.38783	1.4e-16	5.16e-15
LRRC7	ENSG00000033122	protein_coding	-1.79887	-0.417542	1.42e-16	5.21e-15
ESM1	ENSG00000164283	protein_coding	4.47247	3.82246	1.43e-16	5.24e-15
POLQ	ENSG00000051341	protein_coding	2.36124	3.79556	1.5e-16	5.51e-15
HINT3	ENSG00000111911	protein_coding	-0.922841	4.89759	1.52e-16	5.58e-15
LIG1	ENSG00000105486	protein_coding	1.39028	6.00022	1.56e-16	5.72e-15
LYVE1	ENSG00000133800	protein_coding	-2.81595	2.91329	1.57e-16	5.76e-15
RNF38	ENSG00000137075	protein_coding	-1.05278	5.04029	1.58e-16	5.79e-15
CCDC80	ENSG00000091986	protein_coding	-2.64462	6.70349	1.74e-16	6.34e-15
SMIM10	ENSG00000184785	protein_coding	-1.82156	2.406	1.81e-16	6.59e-15
C3orf18	ENSG00000088543	protein_coding	-1.5802	2.1182	1.83e-16	6.68e-15
DPYSL3	ENSG00000113657	protein_coding	-2.33836	7.15245	1.85e-16	6.74e-15
SPAG5	ENSG00000076382	protein_coding	2.1472	5.69746	2.15e-16	7.82e-15
APBB1	ENSG00000166313	protein_coding	-2.04057	3.80834	2.17e-16	7.87e-15
POLR2H	ENSG00000163882	protein_coding	1.15591	6.14222	2.19e-16	7.93e-15
RECQL4	ENSG00000160957	protein_coding	2.19148	5.58736	2.19e-16	7.94e-15
NAA40	ENSG00000110583	protein_coding	1.22601	5.0723	2.22e-16	8.01e-15
C8orf88	ENSG00000253250	protein_coding	-2.67633	0.726273	2.27e-16	8.21e-15
CPEB3	ENSG00000107864	protein_coding	-1.28223	2.20949	2.28e-16	8.24e-15
FAM110D	ENSG00000197245	protein_coding	-1.86355	0.853365	2.37e-16	8.55e-15
TSPYL1	ENSG00000189241	protein_coding	-0.979677	6.13125	2.48e-16	8.91e-15
TMPRSS11A	ENSG00000187054	protein_coding	-4.05837	2.46016	2.49e-16	8.97e-15
LONRF2	ENSG00000170500	protein_coding	-3.03755	2.31049	2.54e-16	9.12e-15
RHOJ	ENSG00000126785	protein_coding	-1.86071	3.18639	2.61e-16	9.37e-15
GJC2	ENSG00000198835	protein_coding	-1.8765	0.825449	2.67e-16	9.56e-15
BX119917.1	ENSG00000225471	transcribed_processed_pseudogene	-1.82137	-1.64342	2.76e-16	9.9e-15
FAM168B	ENSG00000152102	protein_coding	-1.07385	6.5041	3.03e-16	1.08e-14
ALKAL2	ENSG00000189292	protein_coding	-2.33283	-1.13493	3.07e-16	1.1e-14
SLC38A7	ENSG00000103042	protein_coding	1.24779	4.95947	3.09e-16	1.1e-14
KDM6B	ENSG00000132510	protein_coding	-1.27439	6.08021	3.14e-16	1.12e-14
PPP1CB	ENSG00000213639	protein_coding	-0.947747	8.16129	3.33e-16	1.18e-14
RFX2	ENSG00000087903	protein_coding	-1.35247	3.90368	3.43e-16	1.22e-14
ABCB1	ENSG00000085563	protein_coding	-1.87321	1.47519	3.58e-16	1.27e-14
RAD54L	ENSG00000085999	protein_coding	2.33377	3.60098	3.93e-16	1.4e-14
ZBTB21	ENSG00000173276	protein_coding	-1.13667	4.13238	3.94e-16	1.4e-14
DYSF	ENSG00000135636	protein_coding	-1.75015	4.8264	3.97e-16	1.41e-14
CRISPLD2	ENSG00000103196	protein_coding	-2.10777	6.15957	4.08e-16	1.44e-14
EGR2	ENSG00000122877	protein_coding	-2.2885	3.51083	4.16e-16	1.47e-14
ALG9	ENSG00000086848	protein_coding	-0.961149	2.92193	4.2e-16	1.48e-14
COL21A1	ENSG00000124749	protein_coding	-2.56567	1.97249	4.31e-16	1.52e-14
RCC1	ENSG00000180198	protein_coding	1.53833	6.54453	4.39e-16	1.55e-14
GNG11	ENSG00000127920	protein_coding	-1.7539	4.35197	4.55e-16	1.6e-14
AP001542.3	ENSG00000267480	antisense	-1.8738	0.0109006	4.69e-16	1.65e-14
ASF1B	ENSG00000105011	protein_coding	2.1453	5.24095	4.72e-16	1.66e-14
MGARP	ENSG00000137463	protein_coding	-2.28238	-1.69459	4.93e-16	1.73e-14
GPR146	ENSG00000164849	protein_coding	-1.58208	-0.519524	5.08e-16	1.78e-14
S1PR1	ENSG00000170989	protein_coding	-1.8567	3.88239	5.09e-16	1.78e-14
EIF4E3	ENSG00000163412	protein_coding	-1.40083	4.60246	5.48e-16	1.92e-14
PBXIP1	ENSG00000163346	protein_coding	-1.20548	7.40693	5.5e-16	1.92e-14
HMGCLL1	ENSG00000146151	protein_coding	-3.00447	-1.68793	5.67e-16	1.98e-14
KIAA0513	ENSG00000135709	protein_coding	-1.62791	4.24543	5.93e-16	2.07e-14
TACR1	ENSG00000115353	protein_coding	-2.5214	0.329565	5.93e-16	2.07e-14
FBXO32	ENSG00000156804	protein_coding	-1.94127	6.1791	6.03e-16	2.1e-14
SLC24A3	ENSG00000185052	protein_coding	-2.29647	3.41848	6.21e-16	2.16e-14
MATN2	ENSG00000132561	protein_coding	-2.29144	5.65254	6.36e-16	2.21e-14
GYG1	ENSG00000163754	protein_coding	-1.01318	5.74466	6.45e-16	2.24e-14
PDGFD	ENSG00000170962	protein_coding	-1.98657	3.21574	6.91e-16	2.39e-14
FAM72D	ENSG00000215784	protein_coding	2.75837	0.562546	7.41e-16	2.56e-14
PLSCR4	ENSG00000114698	protein_coding	-1.93839	3.23	7.71e-16	2.67e-14
RBKS	ENSG00000171174	protein_coding	-1.35169	2.25895	8.17e-16	2.82e-14
NUP85	ENSG00000125450	protein_coding	1.01327	5.96177	8.44e-16	2.91e-14
RND1	ENSG00000172602	protein_coding	-2.02886	2.32895	8.76e-16	3.02e-14
CDCA3	ENSG00000111665	protein_coding	2.21452	4.7297	8.81e-16	3.03e-14
AC048382.5	ENSG00000275120	antisense	-1.62864	-2.37652	8.89e-16	3.06e-14
PGM5P3-AS1	ENSG00000277631	lincRNA	-3.26974	-3.76366	1.02e-15	3.52e-14
TRPC4	ENSG00000133107	protein_coding	-1.93605	0.0571289	1.1e-15	3.78e-14
AL117336.2	ENSG00000269952	sense_intronic	-1.56929	-1.51868	1.19e-15	4.06e-14
GNAZ	ENSG00000128266	protein_coding	-2.45605	1.99246	1.26e-15	4.31e-14
RGN	ENSG00000130988	protein_coding	-2.52426	0.640874	1.26e-15	4.32e-14
ARHGEF37	ENSG00000183111	protein_coding	-1.90389	3.55086	1.27e-15	4.33e-14
GCSAML	ENSG00000169224	protein_coding	-2.49573	-1.80738	1.3e-15	4.45e-14
SLC52A2	ENSG00000185803	protein_coding	1.44849	6.72824	1.32e-15	4.51e-14
KNTC1	ENSG00000184445	protein_coding	1.72071	5.12797	1.39e-15	4.73e-14
GPR17	ENSG00000144230	protein_coding	-2.40008	-1.62001	1.39e-15	4.74e-14
CCDC27	ENSG00000162592	protein_coding	-2.96408	-3.73229	1.44e-15	4.9e-14
ARSF	ENSG00000062096	protein_coding	-3.39312	-1.53101	1.46e-15	4.94e-14
PPP1R12C	ENSG00000125503	protein_coding	-1.01211	6.61688	1.46e-15	4.96e-14
SKA3	ENSG00000165480	protein_coding	2.17994	3.89311	1.49e-15	5.04e-14
CENPA	ENSG00000115163	protein_coding	2.68671	3.53606	1.49e-15	5.04e-14
C20orf194	ENSG00000088854	protein_coding	-1.26265	4.77014	1.51e-15	5.11e-14
RPS6KA5	ENSG00000100784	protein_coding	-1.53116	3.76027	1.61e-15	5.42e-14
GINS1	ENSG00000101003	protein_coding	2.0666	4.73969	1.63e-15	5.49e-14
EDNRA	ENSG00000151617	protein_coding	-1.9832	3.6851	1.69e-15	5.69e-14
GTPBP3	ENSG00000130299	protein_coding	1.13867	4.66757	1.69e-15	5.69e-14
CDON	ENSG00000064309	protein_coding	-2.19354	2.41721	1.78e-15	5.99e-14
GPM6A	ENSG00000150625	protein_coding	-2.97405	-0.528757	1.83e-15	6.15e-14
AC126696.2	ENSG00000260466	antisense	-3.02443	-3.75239	1.87e-15	6.27e-14
AL122035.1	ENSG00000258824	antisense	-1.4205	-0.765779	1.9e-15	6.36e-14
HABP4	ENSG00000130956	protein_coding	-1.43572	3.48145	1.95e-15	6.52e-14
CDC6	ENSG00000094804	protein_coding	2.0929	5.26164	1.95e-15	6.52e-14
CHTF18	ENSG00000127586	protein_coding	1.81854	5.09525	1.97e-15	6.58e-14
B3GAT2	ENSG00000112309	protein_coding	-1.787	-0.446593	1.97e-15	6.58e-14
C14orf28	ENSG00000179476	protein_coding	-1.00836	2.09177	1.97e-15	6.58e-14
SETBP1	ENSG00000152217	protein_coding	-2.0545	3.43659	2.05e-15	6.83e-14
KCNN2	ENSG00000080709	protein_coding	-2.29804	0.298574	2.06e-15	6.85e-14
MTFR2	ENSG00000146410	protein_coding	2.1195	2.80019	2.13e-15	7.09e-14
CEP68	ENSG00000011523	protein_coding	-0.942949	4.56799	2.2e-15	7.31e-14
LIPI	ENSG00000188992	protein_coding	-2.45049	-2.86528	2.2e-15	7.31e-14
CBX8	ENSG00000141570	protein_coding	1.60898	3.67562	2.22e-15	7.36e-14
GPER1	ENSG00000164850	protein_coding	-2.00106	0.991705	2.24e-15	7.42e-14
BOC	ENSG00000144857	protein_coding	-2.46547	3.71029	2.3e-15	7.61e-14
GPRASP2	ENSG00000158301	protein_coding	-1.38915	3.02132	2.38e-15	7.88e-14
PFKFB4	ENSG00000114268	protein_coding	2.42192	4.40237	2.45e-15	8.1e-14
TTYH3	ENSG00000136295	protein_coding	1.58197	7.13504	2.55e-15	8.41e-14
BNC2	ENSG00000173068	protein_coding	-2.46098	2.99962	2.58e-15	8.51e-14
TMX4	ENSG00000125827	protein_coding	-1.21368	5.60306	2.6e-15	8.56e-14
UBE2T	ENSG00000077152	protein_coding	1.86379	4.51466	2.65e-15	8.71e-14
DNM1P47	ENSG00000259660	transcribed_unprocessed_pseudogene	-2.70241	-3.7193	2.77e-15	9.09e-14
SLAIN2	ENSG00000109171	protein_coding	-0.894869	5.7763	2.77e-15	9.11e-14
CTIF	ENSG00000134030	protein_coding	-1.09171	5.05699	2.85e-15	9.35e-14
PODN	ENSG00000174348	protein_coding	-2.356	5.05899	2.86e-15	9.36e-14
DPCR1	ENSG00000168631	protein_coding	-3.83752	-0.897831	2.91e-15	9.53e-14
JMY	ENSG00000152409	protein_coding	-1.07854	4.45745	2.96e-15	9.68e-14
DUSP8	ENSG00000184545	protein_coding	-1.88937	2.75321	2.97e-15	9.71e-14
MRGPRF-AS1	ENSG00000256508	antisense	-2.68037	-2.66682	2.98e-15	9.73e-14
MPL	ENSG00000117400	protein_coding	-1.63643	-2.39069	3.01e-15	9.83e-14
SPINK7	ENSG00000145879	protein_coding	-3.91598	0.683196	3.06e-15	9.98e-14
KIF4A	ENSG00000090889	protein_coding	2.34027	4.9736	3.14e-15	1.02e-13
LINC00694	ENSG00000225873	protein_coding	-2.61861	-2.68713	3.16e-15	1.03e-13
AC012065.2	ENSG00000233416	processed_pseudogene	-2.3865	-3.96729	3.17e-15	1.03e-13
MAPRE2	ENSG00000166974	protein_coding	-1.56921	4.75567	3.3e-15	1.07e-13
RPL7P3	ENSG00000226094	processed_pseudogene	-3.877	-3.92923	3.31e-15	1.07e-13
ZNF154	ENSG00000179909	protein_coding	-1.77901	1.4287	3.43e-15	1.11e-13
MS4A2	ENSG00000149534	protein_coding	-2.37487	0.515781	3.55e-15	1.15e-13
CBX3	ENSG00000122565	protein_coding	0.987202	7.75759	3.6e-15	1.16e-13
NUF2	ENSG00000143228	protein_coding	2.60673	4.53608	3.65e-15	1.18e-13
JUND	ENSG00000130522	protein_coding	-1.36477	7.54661	3.69e-15	1.19e-13
ORC6	ENSG00000091651	protein_coding	2.15549	3.99225	3.69e-15	1.19e-13
C17orf53	ENSG00000125319	protein_coding	1.89229	3.34542	3.71e-15	1.2e-13
RALGDS	ENSG00000160271	protein_coding	-1.07706	6.52286	3.73e-15	1.2e-13
TMEM206	ENSG00000065600	protein_coding	1.52024	3.93928	3.74e-15	1.2e-13
PART1	ENSG00000152931	lincRNA	-2.70112	1.79495	3.95e-15	1.27e-13
PREX2	ENSG00000046889	protein_coding	-1.95599	2.28551	3.96e-15	1.27e-13
ANO5	ENSG00000171714	protein_coding	-2.58226	1.30067	4.02e-15	1.29e-13
RAB30	ENSG00000137502	protein_coding	-1.49771	3.31853	4.27e-15	1.37e-13
PDIA4	ENSG00000155660	protein_coding	1.42803	8.37508	4.31e-15	1.38e-13
LINC00881	ENSG00000241135	lincRNA	-2.76883	-3.05094	4.37e-15	1.4e-13
PSMG3	ENSG00000157778	protein_coding	1.46674	5.77913	4.68e-15	1.49e-13
CKB	ENSG00000166165	protein_coding	-2.29992	6.77545	4.71e-15	1.5e-13
MGME1	ENSG00000125871	protein_coding	1.18337	5.00079	4.74e-15	1.51e-13
CXCR2	ENSG00000180871	protein_coding	-2.50364	1.47822	4.89e-15	1.56e-13
CACNA2D1	ENSG00000153956	protein_coding	-2.38719	3.39889	4.96e-15	1.58e-13
SHE	ENSG00000169291	protein_coding	-1.78269	2.01312	5.05e-15	1.6e-13
AL445423.1	ENSG00000272823	lincRNA	-2.6269	-2.96914	5.3e-15	1.68e-13
WDFY3-AS2	ENSG00000180769	processed_transcript	-1.45561	0.724187	5.62e-15	1.78e-13
C2CD4B	ENSG00000205502	protein_coding	-2.47588	1.30968	5.8e-15	1.84e-13
C16orf59	ENSG00000162062	protein_coding	2.18615	3.34996	5.8e-15	1.84e-13
RABGAP1	ENSG00000011454	protein_coding	-0.896183	5.91526	5.89e-15	1.86e-13
ERC1	ENSG00000082805	protein_coding	-1.28007	5.67276	5.93e-15	1.87e-13
PRKCB	ENSG00000166501	protein_coding	-2.30044	3.30884	6.27e-15	1.98e-13
SNED1	ENSG00000162804	protein_coding	-1.95152	2.84838	6.29e-15	1.98e-13
ARHGEF26	ENSG00000114790	protein_coding	-1.93988	3.13806	6.4e-15	2.01e-13
POLD1	ENSG00000062822	protein_coding	1.46015	5.47647	6.44e-15	2.02e-13
SEMA3G	ENSG00000010319	protein_coding	-1.71112	3.05149	7.09e-15	2.23e-13
ACTA1	ENSG00000143632	protein_coding	-2.25282	0.000758113	7.78e-15	2.44e-13
PLK4	ENSG00000142731	protein_coding	1.80261	3.83498	8.05e-15	2.52e-13
LINC01354	ENSG00000231768	lincRNA	-2.1488	-1.28204	8.52e-15	2.67e-13
LMCD1	ENSG00000071282	protein_coding	-2.02986	5.3808	8.92e-15	2.79e-13
KLHDC1	ENSG00000197776	protein_coding	-1.43659	0.738373	9.3e-15	2.91e-13
FANCD2	ENSG00000144554	protein_coding	1.72839	4.94105	9.53e-15	2.98e-13
AC083902.2	ENSG00000248713	protein_coding	-3.4658	-0.862706	9.62e-15	3e-13
AC078778.1	ENSG00000257596	antisense	2.32659	-0.107618	9.79e-15	3.05e-13
HSPA12A	ENSG00000165868	protein_coding	-2.0039	2.18607	9.86e-15	3.07e-13
HECTD2	ENSG00000165338	protein_coding	-1.18743	3.43025	9.86e-15	3.07e-13
AC007637.1	ENSG00000256139	sense_overlapping	-2.03756	-2.14945	9.88e-15	3.07e-13
TIMELESS	ENSG00000111602	protein_coding	1.52471	5.94821	1.01e-14	3.13e-13
ITGB3	ENSG00000259207	protein_coding	-2.35004	1.28394	1.05e-14	3.25e-13
TECPR2	ENSG00000196663	protein_coding	-0.883701	4.58397	1.07e-14	3.32e-13
SYNJ2BP	ENSG00000213463	protein_coding	-0.847733	4.99326	1.1e-14	3.41e-13
ADPGK	ENSG00000159322	protein_coding	0.852421	5.81545	1.14e-14	3.52e-13
SACS-AS1	ENSG00000229558	lincRNA	-3.26816	-3.82948	1.14e-14	3.53e-13
AC005884.1	ENSG00000267207	antisense	-2.60049	-3.846	1.16e-14	3.57e-13
FGF13-AS1	ENSG00000226031	antisense	-2.84146	-3.75394	1.16e-14	3.58e-13
HSPA2	ENSG00000126803	protein_coding	-1.98317	4.70016	1.17e-14	3.61e-13
ADAMTS9	ENSG00000163638	protein_coding	-1.91011	3.70345	1.2e-14	3.7e-13
IL1RAPL1	ENSG00000169306	protein_coding	-2.86044	-2.59218	1.21e-14	3.71e-13
NEK2	ENSG00000117650	protein_coding	2.3486	4.37873	1.22e-14	3.76e-13
KLK12	ENSG00000186474	protein_coding	-4.50906	1.19126	1.24e-14	3.79e-13
QRFP	ENSG00000188710	protein_coding	-1.64588	-0.645384	1.24e-14	3.79e-13
CLCN2	ENSG00000114859	protein_coding	1.5092	3.50633	1.25e-14	3.84e-13
PEX14	ENSG00000142655	protein_coding	-0.825601	5.20495	1.29e-14	3.94e-13
PABPC1P4	ENSG00000255642	processed_pseudogene	-1.84334	0.0549326	1.31e-14	4.01e-13
CNTN1	ENSG00000018236	protein_coding	-3.05558	4.20327	1.32e-14	4.03e-13
WRAP73	ENSG00000116213	protein_coding	1.0255	5.02176	1.38e-14	4.21e-13
FAM46A	ENSG00000112773	protein_coding	-1.47736	4.85596	1.44e-14	4.38e-13
TARBP2	ENSG00000139546	protein_coding	1.15539	5.22768	1.44e-14	4.38e-13
PDLIM7	ENSG00000196923	protein_coding	-1.66351	6.51147	1.48e-14	4.51e-13
IL17B	ENSG00000127743	protein_coding	-1.80404	-1.57499	1.51e-14	4.6e-13
KIAA0232	ENSG00000170871	protein_coding	-0.987763	5.28293	1.53e-14	4.66e-13
DNA2	ENSG00000138346	protein_coding	1.69721	3.23646	1.55e-14	4.7e-13
TPSAB1	ENSG00000172236	protein_coding	-2.40593	3.27812	1.56e-14	4.73e-13
AP003071.3	ENSG00000261276	antisense	-2.53019	-3.64923	1.68e-14	5.09e-13
FANCI	ENSG00000140525	protein_coding	1.59593	5.73217	1.71e-14	5.18e-13
ADCYAP1	ENSG00000141433	protein_coding	-2.7712	0.270623	1.73e-14	5.23e-13
SGO1	ENSG00000129810	protein_coding	2.31903	3.2846	1.77e-14	5.35e-13
GAS7	ENSG00000007237	protein_coding	-2.15783	4.40148	1.77e-14	5.35e-13
TTK	ENSG00000112742	protein_coding	2.27502	4.35528	1.8e-14	5.44e-13
HPGDS	ENSG00000163106	protein_coding	-2.05877	0.251922	1.91e-14	5.76e-13
CDC45	ENSG00000093009	protein_coding	2.23596	4.44424	2.11e-14	6.35e-13
DNAJC27	ENSG00000115137	protein_coding	-0.989568	2.34274	2.11e-14	6.35e-13
TSHZ3	ENSG00000121297	protein_coding	-2.0481	3.50101	2.11e-14	6.35e-13
ARHGEF17	ENSG00000110237	protein_coding	-1.29731	5.17514	2.26e-14	6.79e-13
PTBP1	ENSG00000011304	protein_coding	0.729322	8.39322	2.27e-14	6.8e-13
AC092667.1	ENSG00000230393	antisense	-3.5107	-3.47886	2.32e-14	6.96e-13
NRXN1	ENSG00000179915	protein_coding	-3.55775	0.190196	2.35e-14	7.05e-13
RNF222	ENSG00000189051	protein_coding	-2.74294	-0.369191	2.41e-14	7.2e-13
SHMT2	ENSG00000182199	protein_coding	1.41759	7.12694	2.41e-14	7.2e-13
AHNAK	ENSG00000124942	protein_coding	-1.55115	9.6723	2.47e-14	7.39e-13
EMCN	ENSG00000164035	protein_coding	-1.83636	3.16886	2.51e-14	7.48e-13
HELLS	ENSG00000119969	protein_coding	1.65006	4.5761	2.58e-14	7.7e-13
PTCH2	ENSG00000117425	protein_coding	-1.63895	0.760799	2.75e-14	8.2e-13
CSDE1	ENSG00000009307	protein_coding	-0.810151	9.09315	2.75e-14	8.2e-13
TPX2	ENSG00000088325	protein_coding	2.44481	6.82399	2.79e-14	8.29e-13
LIFR	ENSG00000113594	protein_coding	-2.11181	4.06879	2.87e-14	8.52e-13
SLC19A1	ENSG00000173638	protein_coding	1.83176	5.00443	2.87e-14	8.54e-13
RAD51	ENSG00000051180	protein_coding	1.88276	3.94691	2.91e-14	8.62e-13
LBX2	ENSG00000179528	protein_coding	2.35502	0.89728	3.13e-14	9.27e-13
AC012603.1	ENSG00000271849	lincRNA	-1.45076	-2.09529	3.16e-14	9.36e-13
FAM72B	ENSG00000188610	protein_coding	2.60886	1.212	3.28e-14	9.71e-13
MGLL	ENSG00000074416	protein_coding	-1.88407	5.52525	3.35e-14	9.89e-13
CNTN4	ENSG00000144619	protein_coding	-2.15253	1.03328	3.35e-14	9.89e-13
GARNL3	ENSG00000136895	protein_coding	-1.67302	2.49764	3.39e-14	1e-12
TUB	ENSG00000166402	protein_coding	-2.08518	2.47827	3.47e-14	1.02e-12
SSBP2	ENSG00000145687	protein_coding	-1.4877	3.93301	3.59e-14	1.06e-12
PPP1R15A	ENSG00000087074	protein_coding	-1.34841	7.25307	3.87e-14	1.14e-12
CALR	ENSG00000179218	protein_coding	1.13947	10.1937	3.93e-14	1.15e-12
CCDC150	ENSG00000144395	protein_coding	2.24342	1.76745	3.93e-14	1.15e-12
SPON1	ENSG00000262655	protein_coding	-2.3985	5.15656	4.01e-14	1.18e-12
CDC25C	ENSG00000158402	protein_coding	2.15083	2.94987	4.25e-14	1.25e-12
FAAP24	ENSG00000131944	protein_coding	1.39778	2.8517	4.28e-14	1.25e-12
AL355377.1	ENSG00000273597	processed_pseudogene	-2.63652	-3.7809	4.31e-14	1.26e-12
HDC	ENSG00000140287	protein_coding	-2.33891	0.672837	4.52e-14	1.32e-12
PLK1	ENSG00000166851	protein_coding	2.30724	5.70482	4.61e-14	1.35e-12
FBLN2	ENSG00000163520	protein_coding	-2.26449	6.19059	4.76e-14	1.39e-12
ARHGAP1	ENSG00000175220	protein_coding	-1.00712	7.36495	4.77e-14	1.39e-12
FGF10-AS1	ENSG00000248464	antisense	-3.58026	-3.92385	4.79e-14	1.39e-12
CCNB2	ENSG00000157456	protein_coding	2.09611	5.38849	4.97e-14	1.45e-12
PPP2R5A	ENSG00000066027	protein_coding	-0.895478	5.644	5.08e-14	1.48e-12
PCGF1	ENSG00000115289	protein_coding	1.05092	4.21452	5.4e-14	1.57e-12
CDT1	ENSG00000167513	protein_coding	2.1887	5.19157	5.44e-14	1.58e-12
NCAPH	ENSG00000121152	protein_coding	2.22165	4.54386	5.56e-14	1.61e-12
LDB2	ENSG00000169744	protein_coding	-1.59245	3.24192	5.69e-14	1.65e-12
AC105046.1	ENSG00000261026	sense_overlapping	-2.4406	-1.73038	5.75e-14	1.66e-12
FAM72A	ENSG00000196550	protein_coding	2.16473	0.819047	5.84e-14	1.69e-12
CILP	ENSG00000138615	protein_coding	-3.11754	4.61573	6.07e-14	1.75e-12
TES	ENSG00000135269	protein_coding	-1.27193	6.70921	6.09e-14	1.76e-12
AL136531.2	ENSG00000274322	protein_coding	-2.01764	-1.29963	6.3e-14	1.82e-12
DPP3	ENSG00000254986	protein_coding	1.12871	6.31007	6.32e-14	1.82e-12
CDC20	ENSG00000117399	protein_coding	2.48751	6.39101	6.37e-14	1.83e-12
MID2	ENSG00000080561	protein_coding	-1.26356	2.74007	6.42e-14	1.85e-12
MYO9A	ENSG00000066933	protein_coding	-1.01251	4.64691	6.96e-14	2e-12
AC016722.3	ENSG00000260977	lincRNA	-1.58531	-2.4252	7.04e-14	2.02e-12
PTGS2	ENSG00000073756	protein_coding	-2.39241	6.39699	7.11e-14	2.04e-12
Z97989.1	ENSG00000255389	antisense	-1.59568	-0.345076	7.15e-14	2.05e-12
AL356123.2	ENSG00000272549	lincRNA	-2.90134	-3.72348	7.18e-14	2.06e-12
CAVIN1	ENSG00000177469	protein_coding	-1.93298	8.17046	7.22e-14	2.07e-12
FAM96A	ENSG00000166797	protein_coding	0.931464	5.12254	7.34e-14	2.1e-12
ACTL6A	ENSG00000136518	protein_coding	1.19182	6.15547	7.35e-14	2.1e-12
AC073130.3	ENSG00000279086	TEC	-1.76218	-1.39816	7.42e-14	2.12e-12
PKDCC	ENSG00000162878	protein_coding	-2.68143	3.55572	7.6e-14	2.17e-12
GOLGA8VP	ENSG00000259236	unprocessed_pseudogene	-2.41911	-3.29139	7.61e-14	2.17e-12
FAM43A	ENSG00000185112	protein_coding	-1.77461	3.3807	7.62e-14	2.17e-12
AC098617.1	ENSG00000233766	antisense	-3.03847	-3.91495	7.79e-14	2.22e-12
PDE4B	ENSG00000184588	protein_coding	-2.01273	3.4798	7.95e-14	2.26e-12
PHKG1	ENSG00000164776	protein_coding	-1.55292	0.681875	8.12e-14	2.31e-12
BCL2L12	ENSG00000126453	protein_coding	1.43128	4.86923	8.38e-14	2.38e-12
MYRIP	ENSG00000170011	protein_coding	-2.42763	0.105158	8.53e-14	2.42e-12
HTR1B	ENSG00000135312	protein_coding	-2.64737	-1.63202	8.69e-14	2.46e-12
AL133215.2	ENSG00000273162	lincRNA	2.22195	-0.487284	8.71e-14	2.47e-12
STK32B	ENSG00000152953	protein_coding	-2.07002	0.638988	8.73e-14	2.47e-12
ADCY9	ENSG00000162104	protein_coding	-1.4517	4.23867	8.74e-14	2.47e-12
AP001486.2	ENSG00000260966	sense_overlapping	-1.55902	1.30295	8.75e-14	2.47e-12
RAET1K	ENSG00000218358	transcribed_unprocessed_pseudogene	3.42166	-1.29197	8.84e-14	2.49e-12
C20orf144	ENSG00000149609	protein_coding	2.04415	-1.1562	8.97e-14	2.53e-12
TMEM132A	ENSG00000006118	protein_coding	2.27607	6.45506	9e-14	2.53e-12
SIRT1	ENSG00000096717	protein_coding	-1.01023	4.25939	9.03e-14	2.54e-12
AKT3	ENSG00000117020	protein_coding	-1.85172	4.67774	9.05e-14	2.55e-12
GYPC	ENSG00000136732	protein_coding	-2.06452	3.97376	9.08e-14	2.55e-12
LEMD2	ENSG00000161904	protein_coding	0.867322	6.1052	9.48e-14	2.66e-12
PIF1	ENSG00000140451	protein_coding	1.97602	3.28608	9.54e-14	2.68e-12
FAM102B	ENSG00000162636	protein_coding	-1.3798	4.82332	1e-13	2.8e-12
MYCT1	ENSG00000120279	protein_coding	-1.60822	2.42098	1.01e-13	2.83e-12
KIFC1	ENSG00000237649	protein_coding	2.09677	5.59615	1.02e-13	2.86e-12
RNASEH2A	ENSG00000104889	protein_coding	1.51414	5.47748	1.13e-13	3.15e-12
FLAD1	ENSG00000160688	protein_coding	1.13553	5.9827	1.19e-13	3.32e-12
ZNF695	ENSG00000197472	protein_coding	2.61388	0.986387	1.19e-13	3.33e-12
FAXC	ENSG00000146267	protein_coding	-2.05297	2.30228	1.2e-13	3.34e-12
MTMR10	ENSG00000166912	protein_coding	-0.935101	4.28584	1.2e-13	3.35e-12
IQGAP3	ENSG00000183856	protein_coding	2.28959	5.45367	1.23e-13	3.42e-12
TCEAL2	ENSG00000184905	protein_coding	-3.23127	0.863683	1.23e-13	3.43e-12
SLC37A4	ENSG00000137700	protein_coding	1.32263	5.04326	1.23e-13	3.43e-12
AC091825.1	ENSG00000280047	TEC	-1.32452	-0.338352	1.24e-13	3.45e-12
A2M-AS1	ENSG00000245105	antisense	-1.47468	-0.0509119	1.25e-13	3.46e-12
LRRC45	ENSG00000169683	protein_coding	1.51861	5.45747	1.29e-13	3.59e-12
MYL3	ENSG00000160808	protein_coding	-2.46352	-1.9684	1.35e-13	3.73e-12
ORC1	ENSG00000085840	protein_coding	2.16841	3.45632	1.38e-13	3.83e-12
C1orf140	ENSG00000234754	lincRNA	-3.00579	-3.61616	1.39e-13	3.84e-12
ATAD5	ENSG00000176208	protein_coding	1.70084	3.39268	1.4e-13	3.86e-12
MEF2A	ENSG00000068305	protein_coding	-1.06691	5.13043	1.43e-13	3.95e-12
SERTM1	ENSG00000180440	protein_coding	-3.85436	-2.54387	1.44e-13	3.96e-12
KLRB1	ENSG00000111796	protein_coding	-2.02503	1.03262	1.44e-13	3.98e-12
MYOZ2	ENSG00000172399	protein_coding	-2.63183	-3.05185	1.45e-13	3.98e-12
TRAIP	ENSG00000183763	protein_coding	1.67209	3.44533	1.45e-13	3.99e-12
KNOP1	ENSG00000103550	protein_coding	1.17602	4.52633	1.49e-13	4.11e-12
PNMA1	ENSG00000176903	protein_coding	-1.52283	5.06411	1.51e-13	4.14e-12
PDGFRA	ENSG00000134853	protein_coding	-1.98368	4.80835	1.51e-13	4.14e-12
COPG1	ENSG00000181789	protein_coding	0.913814	7.93717	1.54e-13	4.21e-12
LRRC70	ENSG00000186105	protein_coding	-1.60383	-1.38509	1.55e-13	4.25e-12
CCDC137	ENSG00000185298	protein_coding	1.10424	5.70466	1.58e-13	4.34e-12
RAC3	ENSG00000169750	protein_coding	2.80813	3.9237	1.59e-13	4.35e-12
MTBP	ENSG00000172167	protein_coding	1.72322	3.00292	1.59e-13	4.35e-12
DEPDC1B	ENSG00000035499	protein_coding	2.2348	3.5724	1.63e-13	4.44e-12
FANCB	ENSG00000181544	protein_coding	1.93606	1.25918	1.63e-13	4.45e-12
TSLP	ENSG00000145777	protein_coding	-2.10062	1.11811	1.65e-13	4.51e-12
DUS1L	ENSG00000169718	protein_coding	1.23549	7.29783	1.67e-13	4.55e-12
RTL5	ENSG00000242732	protein_coding	-2.06132	2.40958	1.7e-13	4.62e-12
AUNIP	ENSG00000127423	protein_coding	2.11516	2.84584	1.72e-13	4.69e-12
IER5L	ENSG00000188483	protein_coding	2.11519	4.84585	1.74e-13	4.73e-12
GEN1	ENSG00000178295	protein_coding	1.38123	4.34622	1.76e-13	4.79e-12
AL121832.3	ENSG00000275437	sense_intronic	2.39692	0.133402	1.78e-13	4.83e-12
AURKB	ENSG00000178999	protein_coding	2.25733	5.11649	1.79e-13	4.85e-12
SMC2-AS1	ENSG00000270332	lincRNA	-1.94524	-1.61259	1.8e-13	4.86e-12
COASY	ENSG00000068120	protein_coding	0.982743	6.67527	1.8e-13	4.86e-12
MUSTN1	ENSG00000272573	protein_coding	-1.97319	-3.13005	1.85e-13	5e-12
TXNDC12	ENSG00000117862	protein_coding	0.863747	6.55452	1.92e-13	5.17e-12
TEX26-AS1	ENSG00000224743	antisense	-2.49715	-2.77103	1.93e-13	5.2e-12
GPM6B	ENSG00000046653	protein_coding	-1.74814	2.55563	1.94e-13	5.24e-12
TEF	ENSG00000167074	protein_coding	-1.1382	4.6469	1.97e-13	5.3e-12
SKP2	ENSG00000145604	protein_coding	1.84641	5.57015	1.98e-13	5.33e-12
CYB561	ENSG00000008283	protein_coding	1.2811	6.98146	2.05e-13	5.51e-12
CNRIP1	ENSG00000119865	protein_coding	-1.83083	2.78825	2.12e-13	5.69e-12
TCF24	ENSG00000261787	protein_coding	3.36353	-1.059	2.13e-13	5.71e-12
TMEM55A	ENSG00000155099	protein_coding	-1.34047	2.92379	2.14e-13	5.74e-12
PABPC5	ENSG00000174740	protein_coding	-2.22291	-0.845179	2.15e-13	5.76e-12
MUSK	ENSG00000030304	protein_coding	-2.46152	-1.97724	2.18e-13	5.84e-12
ATP5G1P4	ENSG00000227440	processed_pseudogene	2.91961	-0.846157	2.19e-13	5.86e-12
MYO19	ENSG00000278259	protein_coding	1.34527	5.82857	2.19e-13	5.86e-12
MT1JP	ENSG00000255986	transcribed_unprocessed_pseudogene	-3.1424	-3.45028	2.21e-13	5.91e-12
GATA6-AS1	ENSG00000266010	lincRNA	-2.31734	-1.3676	2.25e-13	6e-12
PRSS27	ENSG00000172382	protein_coding	-2.24018	3.62539	2.25e-13	6.01e-12
SPG20	ENSG00000133104	protein_coding	-1.14143	5.54936	2.28e-13	6.07e-12
TTLL11	ENSG00000175764	protein_coding	-1.16634	1.6318	2.28e-13	6.08e-12
ADAMTS5	ENSG00000154736	protein_coding	-1.82858	2.53622	2.42e-13	6.44e-12
BORA	ENSG00000136122	protein_coding	1.68984	3.01421	2.54e-13	6.77e-12
SIK2	ENSG00000170145	protein_coding	-0.8921	5.05982	2.63e-13	6.98e-12
CDC37L1	ENSG00000106993	protein_coding	-0.983493	4.24464	2.67e-13	7.08e-12
MMP11	ENSG00000099953	protein_coding	5.4817	7.47958	2.71e-13	7.18e-12
MEOX1	ENSG00000005102	protein_coding	-2.27843	1.52162	2.73e-13	7.23e-12
SKA1	ENSG00000154839	protein_coding	2.13219	3.80481	2.76e-13	7.3e-12
C19orf48	ENSG00000167747	protein_coding	1.50491	6.48936	2.78e-13	7.35e-12
BCL10	ENSG00000142867	protein_coding	-1.05571	4.87239	2.78e-13	7.35e-12
CAPZA2	ENSG00000198898	protein_coding	-0.896875	6.54021	2.88e-13	7.62e-12
AC073316.3	ENSG00000236708	antisense	-2.49304	-2.5776	2.91e-13	7.69e-12
CENPO	ENSG00000138092	protein_coding	1.46317	3.98674	2.93e-13	7.73e-12
SRPX	ENSG00000101955	protein_coding	-2.36131	4.25481	2.94e-13	7.75e-12
AC055713.1	ENSG00000247373	lincRNA	1.57429	1.53722	3.11e-13	8.18e-12
DDX3X	ENSG00000215301	protein_coding	-0.838839	8.18389	3.11e-13	8.18e-12
KCNK3	ENSG00000171303	protein_coding	-2.66203	2.13191	3.14e-13	8.26e-12
CKS2	ENSG00000123975	protein_coding	1.83382	5.4646	3.14e-13	8.26e-12
C1orf21	ENSG00000116667	protein_coding	-1.3069	5.81145	3.17e-13	8.33e-12
NAT9	ENSG00000109065	protein_coding	1.0503	5.383	3.25e-13	8.52e-12
FAM72C	ENSG00000263513	protein_coding	2.70814	0.135572	3.26e-13	8.54e-12
CSRNP3	ENSG00000178662	protein_coding	-1.95271	1.18556	3.3e-13	8.65e-12
CNKSR3	ENSG00000153721	protein_coding	-1.60754	3.85129	3.39e-13	8.87e-12
POU6F1	ENSG00000184271	protein_coding	-1.36029	2.46319	3.57e-13	9.32e-12
SMUG1	ENSG00000123415	protein_coding	1.14163	5.3463	3.65e-13	9.54e-12
TICRR	ENSG00000140534	protein_coding	1.87611	3.64595	3.79e-13	9.9e-12
AC134043.2	ENSG00000279204	TEC	-1.89283	-0.498492	3.8e-13	9.91e-12
C1orf35	ENSG00000143793	protein_coding	1.11898	4.92824	4.02e-13	1.05e-11
VPS13D	ENSG00000048707	protein_coding	-0.846809	5.89283	4.04e-13	1.05e-11
AL355073.2	ENSG00000275569	antisense	-2.21864	-3.23665	4.04e-13	1.05e-11
FAM212B	ENSG00000197852	protein_coding	-1.20617	3.0126	4.07e-13	1.06e-11
AC091057.3	ENSG00000269974	lincRNA	2.35608	-0.835384	4.12e-13	1.07e-11
CENPK	ENSG00000123219	protein_coding	1.99247	3.31932	4.25e-13	1.1e-11
Y_RNA	ENSG00000223254	misc_RNA	-1.65971	-2.96418	4.37e-13	1.13e-11
AC080188.3	ENSG00000279384	TEC	-1.86327	-1.15998	4.41e-13	1.14e-11
EXO1	ENSG00000174371	protein_coding	2.18733	3.65688	4.48e-13	1.16e-11
CCNB1	ENSG00000134057	protein_coding	2.03689	6.18843	4.5e-13	1.16e-11
DPYSL2	ENSG00000092964	protein_coding	-1.5888	5.5727	4.64e-13	1.2e-11
AC027307.3	ENSG00000268798	lincRNA	-1.5922	-1.45866	4.74e-13	1.22e-11
TK1	ENSG00000167900	protein_coding	2.07706	6.60273	4.82e-13	1.25e-11
ZNF525	ENSG00000203326	protein_coding	1.42382	3.79992	4.96e-13	1.28e-11
NFATC4	ENSG00000100968	protein_coding	-1.55424	4.82042	5.1e-13	1.31e-11
BLOC1S3	ENSG00000189114	protein_coding	1.18741	4.52847	5.12e-13	1.32e-11
NME1	ENSG00000239672	protein_coding	1.38428	6.43382	5.28e-13	1.36e-11
ECE2	ENSG00000145194	protein_coding	1.73368	4.01957	5.35e-13	1.37e-11
HHIP	ENSG00000164161	protein_coding	-2.74514	1.74143	5.47e-13	1.4e-11
EDNRB	ENSG00000136160	protein_coding	-1.94421	3.66191	5.52e-13	1.42e-11
LINC01695	ENSG00000236532	lincRNA	-2.68585	-3.17134	5.63e-13	1.44e-11
PPP1R15B	ENSG00000158615	protein_coding	-0.895884	6.34618	5.71e-13	1.46e-11
PAQR4	ENSG00000162073	protein_coding	2.19385	4.12024	5.99e-13	1.53e-11
SLC5A6	ENSG00000138074	protein_coding	1.8384	6.29993	6e-13	1.54e-11
BUB1B	ENSG00000156970	protein_coding	2.04929	4.58604	6.04e-13	1.54e-11
LOH12CR2	ENSG00000205791	lincRNA	-1.26249	-0.380723	6.06e-13	1.55e-11
DBF4	ENSG00000006634	protein_coding	1.34435	3.9704	6.15e-13	1.57e-11
SAPCD2	ENSG00000186193	protein_coding	2.52902	4.98054	6.45e-13	1.64e-11
GNG12-AS1	ENSG00000232284	antisense	-1.63195	-0.739786	6.51e-13	1.66e-11
CHD5	ENSG00000116254	protein_coding	-2.49038	-0.901258	6.71e-13	1.71e-11
AC002116.2	ENSG00000267698	antisense	1.79811	-0.453737	6.73e-13	1.71e-11
PRR26	ENSG00000180525	protein_coding	-2.28634	-0.103267	6.86e-13	1.74e-11
SLC25A39	ENSG00000013306	protein_coding	1.09548	7.75916	6.88e-13	1.75e-11
CCNF	ENSG00000162063	protein_coding	1.45684	5.05763	6.89e-13	1.75e-11
RPN1	ENSG00000163902	protein_coding	0.933868	8.69174	6.93e-13	1.76e-11
MCM2	ENSG00000073111	protein_coding	1.92351	6.51523	7.07e-13	1.79e-11
YDJC	ENSG00000161179	protein_coding	1.59187	5.18984	7.08e-13	1.8e-11
SCN2B	ENSG00000149575	protein_coding	-2.86878	-1.3202	7.37e-13	1.87e-11
RND3	ENSG00000115963	protein_coding	-1.52769	6.38405	7.5e-13	1.9e-11
KCNN3	ENSG00000143603	protein_coding	-1.85202	2.02108	7.52e-13	1.9e-11
AC145207.9	ENSG00000278876	TEC	2.5187	-1.13352	7.92e-13	2e-11
OMD	ENSG00000127083	protein_coding	-3.02398	0.746646	8.04e-13	2.03e-11
BRIP1	ENSG00000136492	protein_coding	2.05097	3.59075	8.07e-13	2.04e-11
KIF15	ENSG00000163808	protein_coding	2.03641	3.99626	8.22e-13	2.07e-11
AC010976.2	ENSG00000272789	antisense	-2.10924	-1.80312	8.6e-13	2.17e-11
C22orf39	ENSG00000242259	protein_coding	-0.937111	4.50032	8.74e-13	2.2e-11
CSF3	ENSG00000108342	protein_coding	-3.35556	3.49434	8.78e-13	2.21e-11
ST6GALNAC6	ENSG00000160408	protein_coding	-1.09611	5.32359	8.99e-13	2.26e-11
CTSG	ENSG00000100448	protein_coding	-2.9323	1.64375	9.02e-13	2.27e-11
TNFSF12	ENSG00000239697	protein_coding	-1.34559	4.16366	9.69e-13	2.43e-11
CDKN1A	ENSG00000124762	protein_coding	-1.50263	8.08816	9.92e-13	2.49e-11
ZNF670-ZNF695	ENSG00000135747	protein_coding	2.39118	-1.34403	1.01e-12	2.52e-11
EFTUD2	ENSG00000108883	protein_coding	0.865406	7.15853	1.01e-12	2.54e-11
TBL1X	ENSG00000101849	protein_coding	-1.29959	5.17704	1.03e-12	2.57e-11
ARHGAP11B	ENSG00000187951	protein_coding	1.63835	2.86908	1.06e-12	2.64e-11
AC013403.2	ENSG00000272148	antisense	-1.30515	-1.84853	1.06e-12	2.64e-11
PCLAF	ENSG00000166803	protein_coding	1.95002	4.97517	1.11e-12	2.77e-11
TMEM108	ENSG00000144868	protein_coding	-2.45733	1.74611	1.12e-12	2.8e-11
PTPN21	ENSG00000070778	protein_coding	-1.18677	4.15321	1.12e-12	2.8e-11
HAS1	ENSG00000105509	protein_coding	-3.04065	1.71218	1.17e-12	2.91e-11
RAB37	ENSG00000172794	protein_coding	-1.90471	1.39499	1.17e-12	2.91e-11
ARHGEF39	ENSG00000137135	protein_coding	1.74748	3.45969	1.18e-12	2.92e-11
MAP3K8	ENSG00000107968	protein_coding	-1.33296	4.48612	1.18e-12	2.93e-11
MIS18A	ENSG00000159055	protein_coding	1.34415	4.43306	1.19e-12	2.96e-11
PRKAR2B	ENSG00000005249	protein_coding	-1.90388	3.52127	1.21e-12	2.99e-11
TMEM245	ENSG00000106771	protein_coding	-0.973512	6.06861	1.22e-12	3.03e-11
TGFBR2	ENSG00000163513	protein_coding	-1.34975	6.43044	1.22e-12	3.03e-11
DNAJB11	ENSG00000090520	protein_coding	1.00667	6.61505	1.23e-12	3.04e-11
H2AFX	ENSG00000188486	protein_coding	1.58426	6.48255	1.24e-12	3.06e-11
HIST1H2AD	ENSG00000196866	protein_coding	4.02089	0.0796175	1.25e-12	3.08e-11
RDM1	ENSG00000278023	protein_coding	3.01447	1.39998	1.25e-12	3.1e-11
AC022364.1	ENSG00000247934	antisense	-1.24947	0.779107	1.28e-12	3.16e-11
ETS2	ENSG00000157557	protein_coding	-1.41157	8.00121	1.32e-12	3.25e-11
KIAA1210	ENSG00000250423	protein_coding	-2.91107	-2.13037	1.34e-12	3.29e-11
CCDC58	ENSG00000160124	protein_coding	1.08293	4.31933	1.37e-12	3.36e-11
KLHL30	ENSG00000168427	protein_coding	-2.02655	0.0277429	1.38e-12	3.4e-11
TSACC	ENSG00000163467	protein_coding	2.04117	-0.460605	1.38e-12	3.4e-11
HIST3H2A	ENSG00000181218	protein_coding	2.49776	4.25572	1.41e-12	3.47e-11
UTRN	ENSG00000152818	protein_coding	-1.41207	5.27353	1.42e-12	3.48e-11
MELK	ENSG00000165304	protein_coding	2.43906	4.92668	1.48e-12	3.63e-11
VAMP2	ENSG00000220205	protein_coding	-0.927275	5.60751	1.5e-12	3.68e-11
AGRN	ENSG00000188157	protein_coding	1.63635	8.98829	1.51e-12	3.69e-11
DLC1	ENSG00000164741	protein_coding	-1.57727	4.52737	1.54e-12	3.76e-11
CRLF2	ENSG00000205755	protein_coding	-2.23119	-2.20861	1.54e-12	3.76e-11
CA5B	ENSG00000169239	protein_coding	-0.969341	2.5412	1.54e-12	3.77e-11
TCF3	ENSG00000071564	protein_coding	1.05741	6.82287	1.55e-12	3.77e-11
ST3GAL3	ENSG00000126091	protein_coding	-1.09171	3.36899	1.69e-12	4.11e-11
ZWILCH	ENSG00000174442	protein_coding	1.1823	4.53951	1.73e-12	4.22e-11
SHISA6	ENSG00000188803	protein_coding	-2.7904	-0.312441	1.85e-12	4.5e-11
PARPBP	ENSG00000185480	protein_coding	1.61249	3.28375	1.9e-12	4.62e-11
MRGBP	ENSG00000101189	protein_coding	1.09348	5.00856	1.95e-12	4.74e-11
PKD2	ENSG00000118762	protein_coding	-1.1147	4.54725	1.96e-12	4.77e-11
CDKN2AIP	ENSG00000168564	protein_coding	-0.836167	4.2194	1.97e-12	4.78e-11
SYT11	ENSG00000132718	protein_coding	-1.77805	3.82999	1.97e-12	4.78e-11
CHEK1	ENSG00000149554	protein_coding	1.57427	4.58013	2.05e-12	4.97e-11
COL10A1	ENSG00000123500	protein_coding	6.8812	4.61986	2.12e-12	5.15e-11
USP2	ENSG00000036672	protein_coding	-1.99216	1.65342	2.13e-12	5.16e-11
DYM	ENSG00000141627	protein_coding	-0.845951	5.28125	2.13e-12	5.16e-11
FGFR1	ENSG00000077782	protein_coding	-2.06895	5.69415	2.19e-12	5.28e-11
OLFM1	ENSG00000130558	protein_coding	-2.28109	2.45352	2.24e-12	5.41e-11
KIF13A	ENSG00000137177	protein_coding	-1.16816	5.88865	2.25e-12	5.44e-11
PURA	ENSG00000185129	protein_coding	-0.837085	4.81548	2.31e-12	5.58e-11
CMA1	ENSG00000092009	protein_coding	-3.21701	0.0960007	2.31e-12	5.58e-11
ZMYND11	ENSG00000015171	protein_coding	-0.917788	6.329	2.32e-12	5.6e-11
NTF3	ENSG00000185652	protein_coding	-2.3302	0.0878939	2.33e-12	5.61e-11
DDX11	ENSG00000013573	protein_coding	1.36427	5.24326	2.33e-12	5.61e-11
BCL2	ENSG00000171791	protein_coding	-1.55151	3.32414	2.35e-12	5.64e-11
AL033527.3	ENSG00000261798	antisense	3.51856	-1.19337	2.36e-12	5.67e-11
AL662797.2	ENSG00000272273	antisense	-1.42128	-1.23494	2.4e-12	5.76e-11
TACC1	ENSG00000147526	protein_coding	-1.59437	6.91807	2.44e-12	5.86e-11
AC119396.1	ENSG00000263264	protein_coding	-2.05051	-1.3403	2.52e-12	6.03e-11
KCTD9P4	ENSG00000214264	processed_pseudogene	-2.4381	-3.77604	2.54e-12	6.09e-11
SFRP1	ENSG00000104332	protein_coding	-2.77025	4.23672	2.55e-12	6.1e-11
AC015712.2	ENSG00000259583	antisense	-1.5184	1.59305	2.56e-12	6.13e-11
EEF1A1P12	ENSG00000214199	processed_pseudogene	-1.30103	0.491387	2.59e-12	6.19e-11
NPR1	ENSG00000169418	protein_coding	-1.86957	3.13384	2.67e-12	6.37e-11
OIP5	ENSG00000104147	protein_coding	1.99473	2.14485	2.67e-12	6.37e-11
PMP22	ENSG00000109099	protein_coding	-1.83596	5.93576	2.75e-12	6.56e-11
LINC00924	ENSG00000259134	lincRNA	-2.1388	-2.07152	2.79e-12	6.65e-11
CYYR1	ENSG00000166265	protein_coding	-1.401	3.17002	2.85e-12	6.78e-11
EPHA6	ENSG00000080224	protein_coding	-2.78928	-0.876528	2.9e-12	6.9e-11
NAP1L2	ENSG00000186462	protein_coding	-2.02219	1.21147	2.96e-12	7.04e-11
ASB1	ENSG00000065802	protein_coding	-0.986624	4.29875	2.98e-12	7.09e-11
FEM1C	ENSG00000145780	protein_coding	-0.886035	4.53641	3.03e-12	7.2e-11
POLE2	ENSG00000100479	protein_coding	1.67653	2.86039	3.09e-12	7.33e-11
CADM3-AS1	ENSG00000225670	antisense	-2.65251	-0.929542	3.11e-12	7.39e-11
TMEM8B	ENSG00000137103	protein_coding	-1.07441	4.22355	3.13e-12	7.41e-11
TTC9C	ENSG00000162222	protein_coding	0.850069	4.28956	3.15e-12	7.46e-11
CENPI	ENSG00000102384	protein_coding	1.93622	2.87719	3.16e-12	7.47e-11
PPP1R14B	ENSG00000173457	protein_coding	1.39407	7.09917	3.16e-12	7.47e-11
DDX39A	ENSG00000123136	protein_coding	1.13109	6.66771	3.17e-12	7.5e-11
BCO2	ENSG00000197580	protein_coding	-1.8156	0.895517	3.19e-12	7.54e-11
SLC35B1	ENSG00000121073	protein_coding	0.9573	5.81933	3.28e-12	7.74e-11
ARG2	ENSG00000081181	protein_coding	-1.69772	3.28775	3.29e-12	7.75e-11
LRWD1	ENSG00000161036	protein_coding	0.994143	4.82011	3.31e-12	7.79e-11
AC073195.1	ENSG00000271855	lincRNA	2.01939	-0.497174	3.35e-12	7.89e-11
RAP2C-AS1	ENSG00000232160	antisense	-1.23546	-0.0346281	3.36e-12	7.91e-11
TARSL2	ENSG00000185418	protein_coding	-1.02168	3.04157	3.48e-12	8.18e-11
KCNS2	ENSG00000156486	protein_coding	-2.31676	-2.02814	3.49e-12	8.21e-11
KAT2A	ENSG00000108773	protein_coding	1.22229	6.64677	3.56e-12	8.36e-11
HIST1H3D	ENSG00000197409	protein_coding	3.30199	0.803761	3.59e-12	8.41e-11
ERCC6L2	ENSG00000182150	protein_coding	-0.915024	3.35513	3.6e-12	8.44e-11
RFC5	ENSG00000111445	protein_coding	1.17294	4.70339	3.64e-12	8.53e-11
MARF1	ENSG00000166783	protein_coding	-0.773113	5.98949	3.67e-12	8.58e-11
EZH2	ENSG00000106462	protein_coding	1.78398	4.94741	3.75e-12	8.77e-11
AL353708.3	ENSG00000272906	lincRNA	2.07861	-0.641567	3.79e-12	8.85e-11
TFAP4	ENSG00000090447	protein_coding	1.21669	4.32418	3.8e-12	8.88e-11
KIF23	ENSG00000137807	protein_coding	1.87123	5.05195	3.82e-12	8.92e-11
TEPSIN	ENSG00000167302	protein_coding	1.1261	4.31869	4.01e-12	9.35e-11
EEF1A1	ENSG00000156508	protein_coding	-0.927694	11.7468	4.02e-12	9.38e-11
LPAR1	ENSG00000198121	protein_coding	-1.55658	4.07661	4.03e-12	9.38e-11
PITX2	ENSG00000164093	protein_coding	-2.02645	2.94593	4.04e-12	9.38e-11
NCAPG	ENSG00000109805	protein_coding	2.07486	4.6066	4.04e-12	9.38e-11
AL355488.2	ENSG00000273373	antisense	1.77601	2.56727	4.04e-12	9.38e-11
PABPC1L	ENSG00000101104	protein_coding	2.38776	5.54767	4.09e-12	9.5e-11
TACC3	ENSG00000013810	protein_coding	1.93431	6.72243	4.12e-12	9.57e-11
KLHL21	ENSG00000162413	protein_coding	-1.17406	5.78969	4.21e-12	9.77e-11
MTX1	ENSG00000173171	protein_coding	0.965799	4.29324	4.26e-12	9.86e-11
MOB2	ENSG00000182208	protein_coding	-0.852669	5.16362	4.39e-12	1.02e-10
CPA3	ENSG00000163751	protein_coding	-2.31106	3.15884	4.39e-12	1.02e-10
CHRDL1	ENSG00000101938	protein_coding	-3.16504	2.96732	4.41e-12	1.02e-10
FAM180A	ENSG00000189320	protein_coding	-2.54556	0.122697	4.42e-12	1.02e-10
C9orf163	ENSG00000196366	lincRNA	2.55743	-0.689098	4.46e-12	1.03e-10
KLHL13	ENSG00000003096	protein_coding	-2.12795	2.39409	4.47e-12	1.03e-10
LAMA4	ENSG00000112769	protein_coding	-1.60513	6.1277	4.5e-12	1.04e-10
KLHL5	ENSG00000109790	protein_coding	-1.49024	4.58853	4.56e-12	1.05e-10
TMEM88	ENSG00000167874	protein_coding	-1.4815	1.81046	4.61e-12	1.06e-10
LHFP	ENSG00000183722	protein_coding	-1.56759	4.6201	4.68e-12	1.08e-10
AL024507.2	ENSG00000272476	antisense	1.66333	0.0587364	4.82e-12	1.11e-10
KIF18A	ENSG00000121621	protein_coding	2.14446	3.18597	4.82e-12	1.11e-10
DUSP19	ENSG00000162999	protein_coding	-1.20489	1.79885	4.82e-12	1.11e-10
PER3	ENSG00000049246	protein_coding	-1.51911	4.14309	4.9e-12	1.12e-10
PRR19	ENSG00000188368	protein_coding	1.86351	1.68728	4.92e-12	1.13e-10
AC145124.1	ENSG00000255495	antisense	-1.81616	-2.23175	4.97e-12	1.14e-10
CHAF1B	ENSG00000159259	protein_coding	1.75953	4.31118	4.97e-12	1.14e-10
TCEAL3	ENSG00000196507	protein_coding	-1.21568	4.71284	5.03e-12	1.15e-10
DBF4B	ENSG00000161692	protein_coding	1.27229	3.68506	5.06e-12	1.16e-10
THAP2	ENSG00000173451	protein_coding	-0.991957	2.67541	5.17e-12	1.18e-10
SEC61A1	ENSG00000058262	protein_coding	0.796916	8.82422	5.42e-12	1.24e-10
GABARAPL1	ENSG00000139112	protein_coding	-1.13095	5.77919	5.62e-12	1.28e-10
SLC39A4	ENSG00000147804	protein_coding	2.05722	5.6386	5.7e-12	1.3e-10
NFIB	ENSG00000147862	protein_coding	-1.49179	5.32383	5.84e-12	1.33e-10
PYCR1	ENSG00000183010	protein_coding	2.74671	5.83713	6.12e-12	1.39e-10
KAT6B	ENSG00000156650	protein_coding	-1.03586	4.67739	6.24e-12	1.42e-10
SNTG2	ENSG00000172554	protein_coding	-2.52775	-2.35234	6.46e-12	1.47e-10
LRRC46	ENSG00000141294	protein_coding	1.83779	0.775048	6.46e-12	1.47e-10
DDIAS	ENSG00000165490	protein_coding	1.8082	3.48229	6.54e-12	1.49e-10
CDK5	ENSG00000164885	protein_coding	1.1211	4.39337	6.55e-12	1.49e-10
AL137060.1	ENSG00000274270	sense_intronic	2.34373	-0.944942	6.84e-12	1.55e-10
SEMA3E	ENSG00000170381	protein_coding	-2.365	2.0295	6.92e-12	1.57e-10
RBFOX2	ENSG00000100320	protein_coding	-0.857747	6.52338	7.08e-12	1.6e-10
ALKBH6	ENSG00000239382	protein_coding	1.38279	2.36255	7.13e-12	1.61e-10
LCN6	ENSG00000267206	protein_coding	-2.83728	-1.78706	7.15e-12	1.62e-10
CDCA2	ENSG00000184661	protein_coding	2.11276	3.38112	7.2e-12	1.63e-10
OXER1	ENSG00000162881	protein_coding	-1.74657	1.10021	7.27e-12	1.64e-10
PRR11	ENSG00000068489	protein_coding	2.02174	4.77896	7.48e-12	1.69e-10
MCM4	ENSG00000104738	protein_coding	1.54567	7.28401	7.55e-12	1.7e-10
SPC24	ENSG00000161888	protein_coding	1.86206	4.35186	7.56e-12	1.7e-10
CLEC3A	ENSG00000166509	protein_coding	-3.80345	0.987692	7.57e-12	1.71e-10
SNRPA1	ENSG00000131876	protein_coding	0.944245	5.43364	7.6e-12	1.71e-10
FGF13	ENSG00000129682	protein_coding	-1.98493	1.18	7.75e-12	1.74e-10
EZH1	ENSG00000108799	protein_coding	-0.830842	5.07959	7.77e-12	1.75e-10
NEURL1B	ENSG00000214357	protein_coding	-1.51943	5.00139	7.82e-12	1.76e-10
LMX1A	ENSG00000162761	protein_coding	-3.46017	-3.38636	7.9e-12	1.77e-10
PPP1R14BP3	ENSG00000179967	processed_pseudogene	1.5555	4.54575	7.94e-12	1.78e-10
HEPH	ENSG00000089472	protein_coding	-1.99178	4.02518	8.03e-12	1.8e-10
AC069544.1	ENSG00000272853	lincRNA	1.59253	0.282344	8.16e-12	1.83e-10
POP7	ENSG00000172336	protein_coding	1.09507	5.25649	8.16e-12	1.83e-10
KNSTRN	ENSG00000128944	protein_coding	1.44386	4.47094	8.54e-12	1.91e-10
STARD8	ENSG00000130052	protein_coding	-1.49886	2.49245	8.6e-12	1.92e-10
NEXN-AS1	ENSG00000235927	antisense	-1.70677	-2.26358	8.69e-12	1.94e-10
PNPLA7	ENSG00000130653	protein_coding	-1.51738	2.20351	8.94e-12	2e-10
KIF20A	ENSG00000112984	protein_coding	2.02341	5.29364	8.97e-12	2e-10
MRAS	ENSG00000158186	protein_coding	-1.52885	4.29106	9.01e-12	2.01e-10
MIR4653	ENSG00000264425	miRNA	2.39237	-0.579852	9.02e-12	2.01e-10
ACYP1	ENSG00000119640	protein_coding	1.28997	3.32749	9.22e-12	2.05e-10
SOWAHC	ENSG00000198142	protein_coding	-1.4514	5.90913	9.24e-12	2.06e-10
DSN1	ENSG00000149636	protein_coding	1.23852	4.88833	9.36e-12	2.08e-10
CENPE	ENSG00000138778	protein_coding	1.8487	4.62149	9.66e-12	2.15e-10
UBR1	ENSG00000159459	protein_coding	-0.862552	4.55218	9.68e-12	2.15e-10
MAB21L2	ENSG00000181541	protein_coding	-3.18181	-2.26495	9.7e-12	2.15e-10
WDHD1	ENSG00000198554	protein_coding	1.62152	4.22857	9.79e-12	2.17e-10
LINC01197	ENSG00000248441	lincRNA	-1.76731	-0.911061	9.85e-12	2.18e-10
CKAP2L	ENSG00000169607	protein_coding	2.2113	4.16727	9.95e-12	2.2e-10
UNC5C	ENSG00000182168	protein_coding	-1.94132	1.9679	1e-11	2.22e-10
CPQ	ENSG00000104324	protein_coding	-1.51121	4.72202	1e-11	2.22e-10
VSIG10L	ENSG00000186806	protein_coding	-2.21439	3.76494	1e-11	2.22e-10
AL355355.2	ENSG00000234175	processed_pseudogene	-1.5576	-2.24916	1.02e-11	2.25e-10
HPD	ENSG00000158104	protein_coding	-2.05631	0.143263	1.02e-11	2.25e-10
GID4	ENSG00000141034	protein_coding	-0.889313	3.84068	1.04e-11	2.3e-10
HMMR	ENSG00000072571	protein_coding	2.06992	4.3403	1.05e-11	2.31e-10
ARMCX1	ENSG00000126947	protein_coding	-1.77592	3.27825	1.05e-11	2.32e-10
SPATA4	ENSG00000150628	protein_coding	-2.33773	-3.52324	1.06e-11	2.33e-10
PPARGC1B	ENSG00000155846	protein_coding	-1.41705	3.3899	1.12e-11	2.46e-10
SNRPB	ENSG00000125835	protein_coding	1.17045	8.15048	1.14e-11	2.51e-10
LGI1	ENSG00000108231	protein_coding	-3.17605	-2.55023	1.16e-11	2.54e-10
SLC35A2	ENSG00000102100	protein_coding	1.23144	5.88117	1.16e-11	2.55e-10
CEP126	ENSG00000110318	protein_coding	-1.57053	2.15601	1.16e-11	2.55e-10
SAMD8	ENSG00000156671	protein_coding	-0.914571	4.88356	1.22e-11	2.67e-10
MKI67	ENSG00000148773	protein_coding	2.01733	6.98328	1.26e-11	2.75e-10
CYP27B1	ENSG00000111012	protein_coding	2.49055	2.41862	1.28e-11	2.81e-10
HHIP-AS1	ENSG00000248890	antisense	-2.08429	-0.4686	1.3e-11	2.85e-10
UGT1A7	ENSG00000244122	protein_coding	-2.58414	0.22051	1.32e-11	2.89e-10
TMEM223	ENSG00000168569	protein_coding	1.09759	4.55701	1.35e-11	2.96e-10
AC017083.2	ENSG00000273064	antisense	2.06361	-0.917034	1.38e-11	3.02e-10
CORO1C	ENSG00000110880	protein_coding	-1.24525	6.95578	1.41e-11	3.08e-10
DONSON	ENSG00000159147	protein_coding	1.46204	4.57368	1.44e-11	3.14e-10
CRISP3	ENSG00000096006	protein_coding	-3.39934	4.00805	1.46e-11	3.19e-10
CDK15	ENSG00000138395	protein_coding	-1.82393	-1.25247	1.49e-11	3.24e-10
DCLK1	ENSG00000133083	protein_coding	-2.36926	2.49398	1.5e-11	3.27e-10
SNHG1	ENSG00000255717	processed_transcript	1.25599	5.81292	1.53e-11	3.33e-10
NR2F1	ENSG00000175745	protein_coding	-1.73952	4.04455	1.55e-11	3.36e-10
SDC2	ENSG00000169439	protein_coding	-1.7248	5.63986	1.57e-11	3.42e-10
EEF2K	ENSG00000103319	protein_coding	-0.891544	5.42609	1.6e-11	3.46e-10
PFDN6	ENSG00000204220	protein_coding	1.18024	5.71996	1.61e-11	3.49e-10
NAGS	ENSG00000161653	protein_coding	2.21977	2.17805	1.62e-11	3.51e-10
TMEM249	ENSG00000261587	protein_coding	2.92346	-1.76714	1.62e-11	3.51e-10
NUSAP1	ENSG00000137804	protein_coding	1.89441	5.72865	1.63e-11	3.53e-10
AC090825.1	ENSG00000259363	lincRNA	-1.99239	-2.47847	1.63e-11	3.54e-10
FGF7	ENSG00000140285	protein_coding	-2.48825	3.65287	1.64e-11	3.54e-10
TOP2A	ENSG00000131747	protein_coding	2.07867	7.44738	1.65e-11	3.57e-10
TXLNB	ENSG00000164440	protein_coding	-1.86192	-0.182319	1.65e-11	3.57e-10
ASPM	ENSG00000066279	protein_coding	2.25123	4.96728	1.71e-11	3.69e-10
PPM1K	ENSG00000163644	protein_coding	-1.30041	3.77531	1.71e-11	3.7e-10
PBX1	ENSG00000185630	protein_coding	-1.4479	6.64474	1.75e-11	3.77e-10
PCM1	ENSG00000078674	protein_coding	-0.863832	6.38499	1.77e-11	3.82e-10
BUB1	ENSG00000169679	protein_coding	1.7851	5.20079	1.78e-11	3.84e-10
SEC23A	ENSG00000100934	protein_coding	-1.10446	5.85847	1.78e-11	3.84e-10
SSC5D	ENSG00000179954	protein_coding	-2.12043	4.02359	1.8e-11	3.86e-10
MYBL2	ENSG00000101057	protein_coding	2.53951	6.69466	1.8e-11	3.86e-10
AC136604.2	ENSG00000244945	antisense	-1.33409	-1.33347	1.83e-11	3.93e-10
CCDC50	ENSG00000152492	protein_coding	-0.879505	5.94356	1.84e-11	3.94e-10
TBC1D7	ENSG00000145979	protein_coding	1.23473	4.4124	1.87e-11	4.01e-10
PAFAH1B3	ENSG00000079462	protein_coding	1.70091	6.17398	1.88e-11	4.02e-10
NDC80	ENSG00000080986	protein_coding	1.96465	4.65013	1.9e-11	4.07e-10
SBDSP1	ENSG00000225648	transcribed_unprocessed_pseudogene	-0.877183	3.29818	1.91e-11	4.1e-10
ZNF707	ENSG00000181135	protein_coding	0.992798	4.03688	1.95e-11	4.17e-10
MAPKBP1	ENSG00000137802	protein_coding	-0.992538	4.75838	1.95e-11	4.17e-10
AC110285.6	ENSG00000275966	lincRNA	3.65513	-0.772067	1.96e-11	4.18e-10
ERCC6L	ENSG00000186871	protein_coding	2.02769	2.94239	1.98e-11	4.22e-10
FOSL1	ENSG00000175592	protein_coding	-1.93687	5.59275	2.01e-11	4.29e-10
MAD2L1	ENSG00000164109	protein_coding	1.80138	4.87466	2.03e-11	4.33e-10
CREB5	ENSG00000146592	protein_coding	-2.04374	2.28117	2.04e-11	4.35e-10
CDCA4	ENSG00000170779	protein_coding	1.56261	5.13647	2.12e-11	4.52e-10
CCNE1	ENSG00000105173	protein_coding	2.29555	4.78215	2.17e-11	4.6e-10
AC097534.2	ENSG00000272870	antisense	-1.23016	0.569875	2.2e-11	4.68e-10
PEAK1	ENSG00000173517	protein_coding	-0.99946	4.87701	2.24e-11	4.76e-10
CENPH	ENSG00000153044	protein_coding	1.47772	3.85092	2.24e-11	4.77e-10
LINC00959	ENSG00000237489	protein_coding	-1.32006	0.358639	2.27e-11	4.82e-10
AUP1	ENSG00000115307	protein_coding	0.91186	7.63665	2.31e-11	4.89e-10
RAD54B	ENSG00000197275	protein_coding	1.56604	2.34429	2.32e-11	4.92e-10
OXLD1	ENSG00000204237	protein_coding	1.26948	4.96956	2.33e-11	4.93e-10
JPT1	ENSG00000189159	protein_coding	1.43103	7.87653	2.35e-11	4.96e-10
AC087499.1	ENSG00000188013	processed_pseudogene	-1.95173	-1.11253	2.35e-11	4.96e-10
AC104260.2	ENSG00000280304	TEC	-2.09405	-3.21046	2.35e-11	4.96e-10
MEDAG	ENSG00000102802	protein_coding	-2.27432	3.39999	2.4e-11	5.06e-10
KCNJ3	ENSG00000162989	protein_coding	-3.10649	-1.18823	2.41e-11	5.09e-10
RFC4	ENSG00000163918	protein_coding	1.49139	4.93404	2.42e-11	5.11e-10
AL031777.1	ENSG00000217275	processed_pseudogene	4.12695	0.296134	2.46e-11	5.19e-10
C8orf4	ENSG00000176907	protein_coding	-2.00046	6.64672	2.51e-11	5.29e-10
AC027559.1	ENSG00000259658	transcribed_unprocessed_pseudogene	-1.88827	-2.1494	2.52e-11	5.31e-10
NFKBIZ	ENSG00000144802	protein_coding	-1.45792	5.21123	2.53e-11	5.33e-10
C1QTNF6	ENSG00000133466	protein_coding	2.58809	5.89853	2.54e-11	5.34e-10
MCM10	ENSG00000065328	protein_coding	2.15804	4.01653	2.61e-11	5.49e-10
KDELR1	ENSG00000105438	protein_coding	0.828343	8.09862	2.61e-11	5.49e-10
EFNA4	ENSG00000243364	protein_coding	1.42145	4.32012	2.63e-11	5.52e-10
PRX	ENSG00000105227	protein_coding	-1.25566	2.51546	2.63e-11	5.52e-10
MIR548AA2	ENSG00000207688	miRNA	-2.05404	-3.6656	2.65e-11	5.54e-10
TMUB1	ENSG00000164897	protein_coding	1.11184	6.02596	2.66e-11	5.57e-10
GPRIN1	ENSG00000169258	protein_coding	2.75985	3.34206	2.67e-11	5.6e-10
BID	ENSG00000015475	protein_coding	1.26512	5.90386	2.68e-11	5.6e-10
AC127496.3	ENSG00000262313	antisense	-2.83684	-3.8759	2.7e-11	5.64e-10
RAMP1	ENSG00000132329	protein_coding	-2.26591	4.13387	2.71e-11	5.65e-10
DYNAP	ENSG00000178690	protein_coding	-3.89604	-3.4121	2.72e-11	5.68e-10
OR7E47P	ENSG00000257542	transcribed_unprocessed_pseudogene	-1.81692	0.102475	2.75e-11	5.74e-10
COL4A6	ENSG00000197565	protein_coding	-2.15997	5.5244	2.77e-11	5.77e-10
LINC02256	ENSG00000261064	lincRNA	-1.75654	-2.34298	2.78e-11	5.79e-10
UBC	ENSG00000150991	protein_coding	-0.757943	9.47375	2.84e-11	5.92e-10
CHIC1	ENSG00000204116	protein_coding	-0.975051	3.22862	2.84e-11	5.92e-10
DDX12P	ENSG00000214826	unprocessed_pseudogene	1.74122	2.20809	2.85e-11	5.92e-10
GAS1RR	ENSG00000226237	lincRNA	-2.25259	-1.30582	2.92e-11	6.07e-10
LINC00570	ENSG00000224177	lincRNA	-2.51363	-3.87718	2.98e-11	6.19e-10
CENPX	ENSG00000169689	protein_coding	1.26866	5.88422	2.98e-11	6.19e-10
PRDM1	ENSG00000057657	protein_coding	-1.61858	4.75007	2.99e-11	6.21e-10
ZFP36L1	ENSG00000185650	protein_coding	-1.07041	8.70721	3.03e-11	6.28e-10
FBXW9	ENSG00000132004	protein_coding	1.08844	3.94692	3.1e-11	6.43e-10
ATP13A1	ENSG00000105726	protein_coding	0.841285	6.63552	3.13e-11	6.47e-10
CDCA5	ENSG00000146670	protein_coding	1.99178	5.39073	3.24e-11	6.7e-10
HIST2H2BF	ENSG00000203814	protein_coding	3.52171	1.81249	3.25e-11	6.72e-10
TMEM60	ENSG00000135211	protein_coding	0.88625	3.98674	3.28e-11	6.79e-10
MAGOH2P	ENSG00000264176	transcribed_processed_pseudogene	-1.60319	-2.84126	3.31e-11	6.84e-10
TRMU	ENSG00000100416	protein_coding	1.00077	5.1484	3.32e-11	6.85e-10
NFATC2	ENSG00000101096	protein_coding	-1.56546	3.79977	3.32e-11	6.85e-10
FAM175A	ENSG00000163322	protein_coding	-0.92304	2.2224	3.32e-11	6.85e-10
RPLP0P2	ENSG00000243742	transcribed_processed_pseudogene	3.56655	1.93738	3.35e-11	6.89e-10
LMNB1	ENSG00000113368	protein_coding	1.63556	6.13619	3.39e-11	6.98e-10
AL161756.1	ENSG00000214770	antisense	1.80636	-1.49261	3.42e-11	7.04e-10
SLC8A3	ENSG00000100678	protein_coding	-2.42547	-1.68184	3.5e-11	7.19e-10
AC099811.5	ENSG00000278829	sense_intronic	-2.25531	-3.52899	3.53e-11	7.25e-10
AC073352.1	ENSG00000272662	lincRNA	2.74458	-2.28617	3.54e-11	7.26e-10
TTBK2	ENSG00000128881	protein_coding	-0.84839	3.59431	3.54e-11	7.26e-10
SERPINB12	ENSG00000166634	protein_coding	-3.92812	-1.08339	3.54e-11	7.26e-10
KCNH2	ENSG00000055118	protein_coding	-2.56875	3.0918	3.56e-11	7.29e-10
KIAA0907	ENSG00000132680	protein_coding	1.23933	5.72295	3.57e-11	7.31e-10
ALKBH4	ENSG00000160993	protein_coding	0.870591	3.85002	3.65e-11	7.47e-10
DDX55	ENSG00000111364	protein_coding	0.916278	4.69527	3.67e-11	7.51e-10
TPSB2	ENSG00000197253	protein_coding	-2.15447	3.48864	3.67e-11	7.51e-10
AC069499.2	ENSG00000276763	processed_pseudogene	3.50143	-3.1113	3.81e-11	7.79e-10
KPNA2	ENSG00000182481	protein_coding	1.56734	7.40631	3.83e-11	7.83e-10
MTG1	ENSG00000148824	protein_coding	1.33441	3.35265	3.93e-11	8.03e-10
ZDHHC24	ENSG00000174165	protein_coding	1.06463	4.84875	3.97e-11	8.09e-10
FETUB	ENSG00000090512	protein_coding	-3.52945	-2.51199	4.06e-11	8.27e-10
IER2	ENSG00000160888	protein_coding	-1.07253	7.24914	4.1e-11	8.36e-10
TUBG1	ENSG00000131462	protein_coding	1.0682	6.08859	4.11e-11	8.36e-10
CCNA2	ENSG00000145386	protein_coding	1.86477	5.17566	4.14e-11	8.41e-10
ATL1	ENSG00000198513	protein_coding	-1.34197	2.59417	4.19e-11	8.52e-10
AL158212.3	ENSG00000260917	sense_overlapping	-1.16613	1.69316	4.26e-11	8.66e-10
RFC2	ENSG00000049541	protein_coding	1.10458	5.46344	4.35e-11	8.83e-10
AC026904.3	ENSG00000253688	lincRNA	-2.27866	-3.83102	4.36e-11	8.85e-10
BRCA2	ENSG00000139618	protein_coding	1.73471	3.72739	4.37e-11	8.87e-10
RDH12	ENSG00000139988	protein_coding	-2.48927	1.27475	4.39e-11	8.89e-10
DCST1-AS1	ENSG00000232093	antisense	2.07993	0.897654	4.43e-11	8.98e-10
COL4A4	ENSG00000081052	protein_coding	-2.20035	2.31349	4.46e-11	9.04e-10
TRIP13	ENSG00000071539	protein_coding	2.17141	5.0067	4.49e-11	9.09e-10
CEP131	ENSG00000141577	protein_coding	1.35077	5.2217	4.54e-11	9.18e-10
AP000802.1	ENSG00000247416	antisense	-3.04563	-3.1144	4.62e-11	9.33e-10
CHMP3	ENSG00000115561	protein_coding	-0.723998	6.46877	4.7e-11	9.48e-10
ENTPD6	ENSG00000197586	protein_coding	1.03265	6.50689	4.73e-11	9.55e-10
AC115099.1	ENSG00000263167	antisense	-2.6798	-3.79873	4.74e-11	9.57e-10
XRCC3	ENSG00000126215	protein_coding	1.21237	4.40195	4.75e-11	9.58e-10
DLGAP5	ENSG00000126787	protein_coding	2.08781	4.71745	4.78e-11	9.63e-10
NDC1	ENSG00000058804	protein_coding	1.10328	5.60106	4.78e-11	9.63e-10
SDC3	ENSG00000162512	protein_coding	-1.23201	6.4047	4.81e-11	9.67e-10
PDRG1	ENSG00000088356	protein_coding	1.11993	5.01487	4.95e-11	9.95e-10
CXCL12	ENSG00000107562	protein_coding	-2.14221	5.19445	4.97e-11	9.99e-10
CD200	ENSG00000091972	protein_coding	-1.76851	3.48958	5.01e-11	1.01e-09
FAM162B	ENSG00000183807	protein_coding	-1.65496	0.189976	5.03e-11	1.01e-09
DAZAP1	ENSG00000071626	protein_coding	0.682795	7.30471	5.11e-11	1.02e-09
DDOST	ENSG00000244038	protein_coding	0.906005	8.33105	5.12e-11	1.03e-09
AL928654.5	ENSG00000279495	TEC	1.92805	2.1354	5.13e-11	1.03e-09
CDC25A	ENSG00000164045	protein_coding	1.73332	3.87214	5.21e-11	1.04e-09
CSTA	ENSG00000121552	protein_coding	-2.20538	6.50903	5.27e-11	1.05e-09
NEK9	ENSG00000119638	protein_coding	-0.766498	6.00472	5.29e-11	1.06e-09
AP003973.2	ENSG00000271390	lincRNA	-2.0942	-3.49221	5.36e-11	1.07e-09
C12orf76	ENSG00000174456	protein_coding	0.840918	3.29526	5.39e-11	1.08e-09
UNG	ENSG00000076248	protein_coding	1.01839	6.0594	5.45e-11	1.09e-09
ECT2	ENSG00000114346	protein_coding	1.74094	5.56328	5.45e-11	1.09e-09
PCNA	ENSG00000132646	protein_coding	1.39555	7.36956	5.5e-11	1.1e-09
AL138995.1	ENSG00000277763	lincRNA	-1.66836	-2.60454	5.51e-11	1.1e-09
C15orf59	ENSG00000205363	protein_coding	-2.37447	1.76865	5.52e-11	1.1e-09
MPLKIP	ENSG00000168303	protein_coding	0.868157	4.98196	5.53e-11	1.1e-09
FAM124A	ENSG00000150510	protein_coding	-1.76536	1.44958	5.6e-11	1.11e-09
LINC01936	ENSG00000235997	lincRNA	-1.77941	-1.54661	5.68e-11	1.13e-09
GAS6-AS2	ENSG00000272695	lincRNA	-2.24319	0.232808	5.73e-11	1.14e-09
P4HB	ENSG00000185624	protein_coding	0.955088	10.1985	5.74e-11	1.14e-09
CEBPB-AS1	ENSG00000277449	antisense	-1.33129	0.0452805	5.78e-11	1.15e-09
WNT3	ENSG00000108379	protein_coding	2.43893	2.30815	5.88e-11	1.17e-09
EPB41L2	ENSG00000079819	protein_coding	-1.36938	5.01875	5.93e-11	1.17e-09
LINC00472	ENSG00000233237	lincRNA	-1.99096	-2.01637	5.96e-11	1.18e-09
NR2C2AP	ENSG00000184162	protein_coding	1.07265	5.06608	6e-11	1.19e-09
MNT	ENSG00000070444	protein_coding	-0.800314	4.94944	6.04e-11	1.19e-09
GPR89A	ENSG00000117262	protein_coding	1.02897	2.22951	6.09e-11	1.2e-09
KIF11	ENSG00000138160	protein_coding	1.6926	5.37259	6.1e-11	1.21e-09
AP004609.1	ENSG00000245869	antisense	-2.39913	-2.60514	6.13e-11	1.21e-09
UNC119	ENSG00000109103	protein_coding	1.02089	5.33746	6.15e-11	1.21e-09
FGF9	ENSG00000102678	protein_coding	-2.79094	-0.221304	6.17e-11	1.22e-09
BRCA1	ENSG00000012048	protein_coding	1.45532	4.60149	6.21e-11	1.22e-09
FOXM1	ENSG00000111206	protein_coding	2.1312	5.92635	6.22e-11	1.23e-09
PIPOX	ENSG00000179761	protein_coding	-1.82624	0.414899	6.26e-11	1.23e-09
IL11RA	ENSG00000137070	protein_coding	-1.21648	3.13989	6.45e-11	1.27e-09
PDIA3	ENSG00000167004	protein_coding	0.925279	9.20541	6.49e-11	1.28e-09
RELL2	ENSG00000164620	protein_coding	1.69499	1.886	6.59e-11	1.3e-09
ST8SIA1	ENSG00000111728	protein_coding	-1.93025	1.8683	6.66e-11	1.31e-09
RGCC	ENSG00000102760	protein_coding	-1.39086	4.10168	6.7e-11	1.32e-09
AC090617.6	ENSG00000263050	lincRNA	-1.11523	-0.0475551	6.9e-11	1.35e-09
ATP13A2	ENSG00000159363	protein_coding	1.04813	6.2394	6.98e-11	1.37e-09
SAC3D1	ENSG00000168061	protein_coding	1.59987	4.21656	7.17e-11	1.41e-09
MECP2	ENSG00000169057	protein_coding	-0.639794	5.63356	7.2e-11	1.41e-09
ELN	ENSG00000049540	protein_coding	-2.13326	5.63673	7.23e-11	1.42e-09
MRM1	ENSG00000278619	protein_coding	1.261	3.79474	7.28e-11	1.42e-09
PCDHGB7	ENSG00000254122	protein_coding	-1.8202	0.772371	7.3e-11	1.43e-09
POLR2G	ENSG00000168002	protein_coding	0.909118	6.14953	7.37e-11	1.44e-09
PRDM8	ENSG00000152784	protein_coding	-1.82487	2.08473	7.39e-11	1.44e-09
KATNAL1	ENSG00000102781	protein_coding	-1.68299	3.2964	7.4e-11	1.44e-09
DCAF12L1	ENSG00000198889	protein_coding	-3.55548	-3.40022	7.49e-11	1.46e-09
LSM4	ENSG00000130520	protein_coding	0.973539	6.9334	7.64e-11	1.49e-09
AC053503.4	ENSG00000234638	antisense	-3.41979	-1.45709	7.74e-11	1.51e-09
ABCB4	ENSG00000005471	protein_coding	-1.39767	0.391834	7.76e-11	1.51e-09
SALL4	ENSG00000101115	protein_coding	3.17325	2.37296	7.82e-11	1.52e-09
RAD51AP1	ENSG00000111247	protein_coding	1.88916	3.74578	7.88e-11	1.53e-09
OTX1	ENSG00000115507	protein_coding	2.44744	2.34506	7.91e-11	1.54e-09
KIAA1524	ENSG00000163507	protein_coding	1.66879	3.84658	8.03e-11	1.56e-09
HIST1H2BD	ENSG00000158373	protein_coding	2.37474	4.38362	8.09e-11	1.57e-09
ZGRF1	ENSG00000138658	protein_coding	1.42716	2.85639	8.18e-11	1.59e-09
CCDC43	ENSG00000180329	protein_coding	0.821327	4.85661	8.21e-11	1.59e-09
RDH5	ENSG00000135437	protein_coding	-1.4877	-0.35649	8.3e-11	1.61e-09
DTL	ENSG00000143476	protein_coding	1.81181	4.29915	8.3e-11	1.61e-09
TCEAL4	ENSG00000133142	protein_coding	-0.85384	6.69352	8.58e-11	1.66e-09
AC092171.4	ENSG00000272953	lincRNA	2.14753	-0.780141	8.73e-11	1.69e-09
AC037459.2	ENSG00000251034	antisense	-1.17477	-0.553665	8.74e-11	1.69e-09
KIF26B	ENSG00000162849	protein_coding	2.80112	4.56426	8.85e-11	1.71e-09
ODC1	ENSG00000115758	protein_coding	-1.52313	6.61777	9.01e-11	1.74e-09
MIR222HG	ENSG00000270069	lincRNA	-1.71057	2.21875	9.12e-11	1.76e-09
AC087388.1	ENSG00000262251	sense_intronic	1.72404	0.785134	9.51e-11	1.83e-09
ARRDC4	ENSG00000140450	protein_coding	-1.40406	4.31034	9.57e-11	1.84e-09
CST1	ENSG00000170373	protein_coding	7.80171	4.9899	9.63e-11	1.85e-09
STX12	ENSG00000117758	protein_coding	-0.645206	5.60385	9.9e-11	1.9e-09
C2orf68	ENSG00000168887	protein_coding	0.952865	5.41363	1e-10	1.92e-09
HIST1H2AE	ENSG00000277075	protein_coding	3.45159	1.70827	1e-10	1.93e-09
CKS1B	ENSG00000173207	protein_coding	1.54758	5.26406	1.01e-10	1.93e-09
AC010226.1	ENSG00000249249	antisense	-1.1746	-1.01204	1.01e-10	1.95e-09
BIRC5	ENSG00000089685	protein_coding	1.97259	6.12113	1.03e-10	1.97e-09
WDR4	ENSG00000160193	protein_coding	1.15492	4.4513	1.03e-10	1.98e-09
FANCG	ENSG00000221829	protein_coding	1.28383	4.90753	1.04e-10	1.99e-09
HIST1H3G	ENSG00000273983	protein_coding	4.09108	1.15866	1.04e-10	1.99e-09
AC011912.1	ENSG00000279145	TEC	-1.61849	-2.12224	1.09e-10	2.08e-09
FASTKD3	ENSG00000124279	protein_coding	1.04867	3.28749	1.09e-10	2.09e-09
CST2	ENSG00000170369	protein_coding	6.05378	0.448458	1.09e-10	2.09e-09
FAM149A	ENSG00000109794	protein_coding	-1.94504	2.47511	1.1e-10	2.1e-09
FIRRE	ENSG00000213468	lincRNA	3.66879	1.28574	1.1e-10	2.1e-09
ENPP3	ENSG00000154269	protein_coding	-2.05108	-1.81782	1.11e-10	2.11e-09
PTGES3L-AARSD1	ENSG00000108825	protein_coding	-1.95129	-2.36735	1.15e-10	2.19e-09
AC006963.1	ENSG00000279587	TEC	-2.41621	-3.68037	1.15e-10	2.2e-09
SMYD2	ENSG00000143499	protein_coding	1.14447	5.64135	1.16e-10	2.21e-09
AL096828.3	ENSG00000273821	lincRNA	2.26678	-1.3632	1.17e-10	2.23e-09
AFAP1	ENSG00000196526	protein_coding	-1.26314	5.1107	1.17e-10	2.23e-09
AC079907.1	ENSG00000257222	antisense	1.75643	-1.64647	1.18e-10	2.25e-09
AF111167.2	ENSG00000259319	antisense	-1.52122	-0.28304	1.19e-10	2.26e-09
SELE	ENSG00000007908	protein_coding	-2.49005	3.95496	1.2e-10	2.27e-09
SPC25	ENSG00000152253	protein_coding	1.84578	3.15824	1.21e-10	2.29e-09
SLC25A12	ENSG00000115840	protein_coding	-0.918822	4.48305	1.21e-10	2.3e-09
TEFM	ENSG00000172171	protein_coding	0.894202	2.94473	1.22e-10	2.32e-09
ACSM5	ENSG00000183549	protein_coding	-2.04388	-1.52761	1.25e-10	2.38e-09
CHAF1A	ENSG00000167670	protein_coding	1.1396	5.50138	1.25e-10	2.38e-09
COL11A1	ENSG00000060718	protein_coding	5.82805	5.22592	1.28e-10	2.42e-09
TSHZ1	ENSG00000179981	protein_coding	-1.06811	4.37316	1.3e-10	2.46e-09
FEN1	ENSG00000168496	protein_coding	1.55873	5.92851	1.31e-10	2.48e-09
CELSR3	ENSG00000008300	protein_coding	2.68236	4.65563	1.31e-10	2.49e-09
CCDC189	ENSG00000196118	protein_coding	1.71634	0.869983	1.35e-10	2.55e-09
NUDT5	ENSG00000165609	protein_coding	1.09131	6.21653	1.35e-10	2.55e-09
MRPS26	ENSG00000125901	protein_coding	1.09047	6.20079	1.36e-10	2.56e-09
ACTN1	ENSG00000072110	protein_coding	-1.41957	8.34254	1.36e-10	2.56e-09
GLIPR1L2	ENSG00000180481	protein_coding	-1.49499	-0.901896	1.36e-10	2.56e-09
ADCY2	ENSG00000078295	protein_coding	-2.31172	0.813243	1.42e-10	2.67e-09
AP5Z1	ENSG00000242802	protein_coding	0.903908	5.71801	1.42e-10	2.67e-09
PTGDS	ENSG00000107317	protein_coding	-2.2886	5.46165	1.42e-10	2.68e-09
RHNO1	ENSG00000171792	protein_coding	0.96043	5.31239	1.43e-10	2.68e-09
MTERF1	ENSG00000127989	protein_coding	0.805598	3.27152	1.44e-10	2.71e-09
PTGER3	ENSG00000050628	protein_coding	-2.3204	2.15438	1.5e-10	2.82e-09
ATXN1	ENSG00000124788	protein_coding	-1.30737	4.7425	1.51e-10	2.83e-09
PLEKHO2	ENSG00000241839	protein_coding	-1.1678	5.16021	1.52e-10	2.86e-09
KCNJ8	ENSG00000121361	protein_coding	-1.70731	2.74369	1.53e-10	2.86e-09
AL133346.1	ENSG00000227220	antisense	-2.59912	-3.2582	1.53e-10	2.87e-09
DNMT3B	ENSG00000088305	protein_coding	2.24321	4.22137	1.54e-10	2.88e-09
MTHFD1L	ENSG00000120254	protein_coding	1.58175	5.26216	1.56e-10	2.93e-09
LIX1L	ENSG00000271601	protein_coding	-1.23442	4.6612	1.57e-10	2.94e-09
AP000894.2	ENSG00000265179	processed_transcript	-2.68943	-2.28511	1.59e-10	2.97e-09
AL357055.3	ENSG00000238198	lincRNA	-1.43481	-2.20831	1.59e-10	2.97e-09
UFSP2	ENSG00000109775	protein_coding	-0.764858	4.08682	1.6e-10	3e-09
CASP6	ENSG00000138794	protein_coding	1.0907	4.69755	1.64e-10	3.05e-09
CDC7	ENSG00000097046	protein_coding	1.53862	3.88485	1.64e-10	3.06e-09
SMG7	ENSG00000116698	protein_coding	0.709762	6.64274	1.64e-10	3.06e-09
CLK2	ENSG00000176444	protein_coding	1.02002	5.86851	1.65e-10	3.07e-09
AC011603.2	ENSG00000257913	antisense	2.47615	-0.771557	1.65e-10	3.07e-09
OPN1SW	ENSG00000128617	protein_coding	-1.18457	1.45325	1.68e-10	3.13e-09
HIST1H1PS1	ENSG00000216331	unprocessed_pseudogene	3.78326	-0.739236	1.69e-10	3.15e-09
FAM110A	ENSG00000125898	protein_coding	1.29172	5.53461	1.73e-10	3.21e-09
DHX37	ENSG00000150990	protein_coding	0.792594	5.26296	1.76e-10	3.26e-09
AC018752.1	ENSG00000250015	lincRNA	-1.96089	-3.40932	1.76e-10	3.27e-09
PNKP	ENSG00000039650	protein_coding	1.03004	5.67927	1.78e-10	3.3e-09
SYDE2	ENSG00000097096	protein_coding	-1.3592	2.26048	1.78e-10	3.3e-09
LDLR	ENSG00000130164	protein_coding	-1.61003	6.32221	1.8e-10	3.34e-09
NRXN2	ENSG00000110076	protein_coding	-2.0343	1.63304	1.83e-10	3.38e-09
TMC6	ENSG00000141524	protein_coding	1.40762	6.83397	1.83e-10	3.39e-09
AL136162.1	ENSG00000271888	lincRNA	2.0535	-0.529247	1.83e-10	3.39e-09
GRIK3	ENSG00000163873	protein_coding	-2.5193	-0.0202145	1.88e-10	3.47e-09
PSRC1	ENSG00000134222	protein_coding	1.60977	3.75175	1.89e-10	3.5e-09
AC098614.1	ENSG00000213846	transcribed_processed_pseudogene	-1.35363	-0.122917	1.9e-10	3.51e-09
RCVRN	ENSG00000109047	protein_coding	-2.06767	-2.99349	1.91e-10	3.54e-09
CRYM	ENSG00000103316	protein_coding	-2.38126	2.16403	1.93e-10	3.56e-09
AC008105.1	ENSG00000233175	antisense	2.14836	0.618992	1.94e-10	3.58e-09
CIT	ENSG00000122966	protein_coding	1.58144	4.89353	1.98e-10	3.64e-09
PLXNA1	ENSG00000114554	protein_coding	1.40449	7.15471	1.99e-10	3.66e-09
ZHX1-C8orf76	ENSG00000259305	protein_coding	1.36266	0.585695	2e-10	3.69e-09
HIST1H2BJ	ENSG00000124635	protein_coding	3.08812	2.31523	2.03e-10	3.73e-09
NAMPT	ENSG00000105835	protein_coding	-1.42687	7.30917	2.08e-10	3.82e-09
SDAD1P1	ENSG00000228451	transcribed_processed_pseudogene	-1.12459	0.709984	2.08e-10	3.82e-09
TSC22D3	ENSG00000157514	protein_coding	-1.33583	6.73095	2.08e-10	3.82e-09
SLC50A1	ENSG00000169241	protein_coding	1.28564	6.34937	2.09e-10	3.84e-09
TNRC6C	ENSG00000078687	protein_coding	-1.06104	3.63642	2.1e-10	3.85e-09
AP003486.2	ENSG00000255455	lincRNA	-1.09537	2.18271	2.1e-10	3.86e-09
NELFCD	ENSG00000101158	protein_coding	0.852218	6.9497	2.13e-10	3.9e-09
AC106786.2	ENSG00000249996	antisense	-1.51337	-2.87127	2.15e-10	3.93e-09
C1orf159	ENSG00000131591	protein_coding	1.2865	4.69808	2.17e-10	3.97e-09
VSIG1	ENSG00000101842	protein_coding	-2.3861	2.01183	2.19e-10	4e-09
OTC	ENSG00000036473	protein_coding	-3.23599	-3.7215	2.23e-10	4.07e-09
WDR90	ENSG00000161996	protein_coding	1.32031	5.27967	2.23e-10	4.07e-09
AC110285.7	ENSG00000279692	TEC	3.11997	0.489141	2.32e-10	4.23e-09
BRI3BP	ENSG00000184992	protein_coding	1.32153	4.98544	2.32e-10	4.23e-09
ALOX12	ENSG00000108839	protein_coding	-2.05727	2.91157	2.33e-10	4.25e-09
SASS6	ENSG00000156876	protein_coding	1.24639	3.33961	2.33e-10	4.25e-09
AL078621.3	ENSG00000279267	TEC	-1.20242	-0.352914	2.41e-10	4.4e-09
TMEM69	ENSG00000159596	protein_coding	0.822803	5.27788	2.44e-10	4.45e-09
RAE1	ENSG00000101146	protein_coding	0.814117	5.58878	2.5e-10	4.55e-09
AL928654.1	ENSG00000242085	processed_pseudogene	1.7862	-1.10729	2.51e-10	4.58e-09
ANKRD62	ENSG00000181626	protein_coding	-2.63745	-2.91539	2.53e-10	4.6e-09
FYN	ENSG00000010810	protein_coding	-1.40446	4.98708	2.55e-10	4.64e-09
SLURP1	ENSG00000126233	protein_coding	-3.26004	1.88152	2.55e-10	4.64e-09
PDLIM5	ENSG00000163110	protein_coding	-1.04281	6.50371	2.58e-10	4.69e-09
EIF4B	ENSG00000063046	protein_coding	-0.7698	8.00402	2.6e-10	4.72e-09
GINS2	ENSG00000131153	protein_coding	1.62773	4.50461	2.61e-10	4.73e-09
SMG9	ENSG00000105771	protein_coding	0.943215	5.66272	2.62e-10	4.76e-09
NMRK2	ENSG00000077009	protein_coding	-2.83518	-3.69779	2.66e-10	4.82e-09
GPS1	ENSG00000169727	protein_coding	0.806804	7.14819	2.69e-10	4.86e-09
DCT	ENSG00000080166	protein_coding	-2.64451	-3.04939	2.7e-10	4.89e-09
ANKRD44	ENSG00000065413	protein_coding	-1.32659	3.0964	2.71e-10	4.91e-09
AL391244.1	ENSG00000224870	processed_transcript	0.817478	4.48465	2.72e-10	4.93e-09
CLIP1	ENSG00000130779	protein_coding	-0.984386	6.66522	2.73e-10	4.93e-09
AL136084.3	ENSG00000270412	antisense	-1.88707	-1.77587	2.77e-10	5.01e-09
TOR2A	ENSG00000160404	protein_coding	0.988222	4.15893	2.77e-10	5.01e-09
HMGN1	ENSG00000205581	protein_coding	0.871431	7.52364	2.87e-10	5.19e-09
MFSD3	ENSG00000167700	protein_coding	1.51255	4.76543	2.88e-10	5.2e-09
FAM46C	ENSG00000183508	protein_coding	-1.53825	3.91661	2.91e-10	5.25e-09
AC005736.1	ENSG00000262185	sense_overlapping	-1.67341	-2.53611	2.94e-10	5.3e-09
RUVBL1	ENSG00000175792	protein_coding	1.08782	6.2521	2.96e-10	5.33e-09
GEMIN6	ENSG00000152147	protein_coding	0.955464	4.10628	2.99e-10	5.37e-09
ETF1	ENSG00000120705	protein_coding	-0.756926	6.82491	2.99e-10	5.38e-09
AP1S1	ENSG00000106367	protein_coding	1.02385	6.15062	3.02e-10	5.42e-09
EBF3	ENSG00000108001	protein_coding	-1.68559	1.14693	3.03e-10	5.44e-09
RHBDD3	ENSG00000100263	protein_coding	1.0721	4.95138	3.03e-10	5.44e-09
ACTBP11	ENSG00000188460	processed_pseudogene	-1.55932	-2.70241	3.03e-10	5.44e-09
RNU6-529P	ENSG00000200253	snRNA	-1.4026	-2.74379	3.04e-10	5.45e-09
ANKRD53	ENSG00000144031	protein_coding	-1.51349	-0.72257	3.05e-10	5.46e-09
ETV4	ENSG00000175832	protein_coding	2.64344	5.28229	3.06e-10	5.47e-09
ECSCR	ENSG00000249751	protein_coding	-1.4926	1.4893	3.07e-10	5.5e-09
STMN1	ENSG00000117632	protein_coding	1.71618	8.26418	3.08e-10	5.51e-09
PSMD3	ENSG00000108344	protein_coding	0.990159	7.59879	3.1e-10	5.54e-09
RANBP1	ENSG00000099901	protein_coding	1.1599	6.70417	3.15e-10	5.63e-09
RFTN2	ENSG00000162944	protein_coding	-1.20367	1.38482	3.18e-10	5.68e-09
DDX11-AS1	ENSG00000245614	antisense	1.65917	0.541966	3.21e-10	5.73e-09
GRIN2D	ENSG00000105464	protein_coding	3.67127	4.64323	3.24e-10	5.77e-09
CHURC1	ENSG00000258289	protein_coding	-0.915632	5.07884	3.25e-10	5.8e-09
ZNF252P-AS1	ENSG00000255559	antisense	2.12178	-0.797029	3.31e-10	5.9e-09
FO393418.1	ENSG00000223695	lincRNA	-1.43516	-2.79668	3.31e-10	5.9e-09
PKMYT1	ENSG00000127564	protein_coding	1.92506	4.69512	3.34e-10	5.95e-09
C1orf174	ENSG00000198912	protein_coding	0.674277	4.79042	3.35e-10	5.95e-09
GULP1	ENSG00000144366	protein_coding	-1.7335	2.86409	3.36e-10	5.97e-09
PITPNM2	ENSG00000090975	protein_coding	-1.16983	4.01194	3.36e-10	5.97e-09
TBC1D31	ENSG00000156787	protein_coding	1.10696	3.4104	3.36e-10	5.98e-09
POLG2	ENSG00000256525	protein_coding	0.97011	3.42889	3.37e-10	5.99e-09
GATA1	ENSG00000102145	protein_coding	-1.81321	-2.73065	3.43e-10	6.1e-09
DHCR7	ENSG00000172893	protein_coding	1.52754	6.3327	3.44e-10	6.1e-09
FAM111B	ENSG00000189057	protein_coding	2.23487	4.0888	3.45e-10	6.12e-09
MTERF3	ENSG00000156469	protein_coding	0.894555	4.58222	3.46e-10	6.14e-09
CENPU	ENSG00000151725	protein_coding	1.63175	4.66496	3.47e-10	6.15e-09
AL513218.1	ENSG00000272100	antisense	1.97252	-1.5422	3.55e-10	6.28e-09
KIF14	ENSG00000118193	protein_coding	2.03172	3.79374	3.68e-10	6.51e-09
MFSD13A	ENSG00000138111	protein_coding	1.36027	3.37345	3.69e-10	6.53e-09
GRIK5	ENSG00000105737	protein_coding	-2.00867	1.23641	3.71e-10	6.56e-09
TSEN54	ENSG00000182173	protein_coding	0.914244	5.68415	3.78e-10	6.67e-09
MYL6	ENSG00000092841	protein_coding	-0.876229	9.90833	3.79e-10	6.69e-09
PHF1	ENSG00000112511	protein_coding	-0.750666	5.72731	3.82e-10	6.75e-09
TBRG4	ENSG00000136270	protein_coding	0.816748	6.58985	3.89e-10	6.86e-09
RHEBL1	ENSG00000167550	protein_coding	1.9452	1.26782	3.89e-10	6.86e-09
COQ10B	ENSG00000115520	protein_coding	-0.700553	4.95666	3.91e-10	6.89e-09
TRPC1	ENSG00000144935	protein_coding	-1.42706	2.18628	3.94e-10	6.94e-09
RPL21P135	ENSG00000235482	processed_pseudogene	-1.9066	-3.62009	3.97e-10	6.98e-09
HDAC5	ENSG00000108840	protein_coding	-0.842897	5.8858	3.99e-10	7.02e-09
AC004754.1	ENSG00000269881	protein_coding	-1.41485	-2.43083	4.01e-10	7.05e-09
POLA2	ENSG00000014138	protein_coding	1.1122	4.9083	4.03e-10	7.09e-09
MAP4	ENSG00000047849	protein_coding	-0.802094	8.11303	4.07e-10	7.16e-09
MTG2	ENSG00000101181	protein_coding	0.754069	5.20468	4.08e-10	7.16e-09
MCL1	ENSG00000143384	protein_coding	-0.985727	8.8446	4.1e-10	7.19e-09
NCAM1-AS1	ENSG00000227487	antisense	-3.17537	-3.96699	4.21e-10	7.39e-09
DDX56	ENSG00000136271	protein_coding	0.746383	6.62798	4.25e-10	7.45e-09
CCSAP	ENSG00000154429	protein_coding	1.22155	4.10716	4.26e-10	7.46e-09
RORB	ENSG00000198963	protein_coding	-2.36355	0.216519	4.35e-10	7.61e-09
HIST1H2BO	ENSG00000274641	protein_coding	4.2855	-0.769042	4.39e-10	7.68e-09
EMILIN1	ENSG00000138080	protein_coding	-1.89258	6.63507	4.43e-10	7.75e-09
TOR3A	ENSG00000186283	protein_coding	0.863894	6.11205	4.57e-10	7.98e-09
UBE2Q1	ENSG00000160714	protein_coding	0.657334	6.61844	4.58e-10	8e-09
SEPT10	ENSG00000186522	protein_coding	-0.95934	5.88079	4.72e-10	8.23e-09
ERAL1	ENSG00000132591	protein_coding	0.91761	6.22221	4.75e-10	8.29e-09
AC010326.4	ENSG00000270804	transcribed_processed_pseudogene	1.51049	2.15897	4.78e-10	8.33e-09
MYOZ3	ENSG00000164591	protein_coding	-1.92655	-0.810274	4.79e-10	8.35e-09
PLA2G15	ENSG00000103066	protein_coding	1.17794	5.1666	4.9e-10	8.54e-09
TDRKH-AS1	ENSG00000203288	antisense	2.2093	-0.441937	4.92e-10	8.56e-09
MIR99AHG	ENSG00000215386	lincRNA	-2.22801	0.295999	4.93e-10	8.59e-09
PIMREG	ENSG00000129195	protein_coding	2.19305	3.76622	5.09e-10	8.85e-09
OSBPL5	ENSG00000021762	protein_coding	-0.974166	4.61069	5.09e-10	8.85e-09
RNFT2	ENSG00000135119	protein_coding	2.22384	2.47742	5.12e-10	8.89e-09
KLHL33	ENSG00000185271	protein_coding	-2.70229	-3.37315	5.15e-10	8.95e-09
DTYMK	ENSG00000168393	protein_coding	1.19332	5.29062	5.17e-10	8.98e-09
DAGLB	ENSG00000164535	protein_coding	0.786344	4.86186	5.27e-10	9.14e-09
ZXDB	ENSG00000198455	protein_coding	-0.859901	3.64049	5.3e-10	9.19e-09
CHAC1	ENSG00000128965	protein_coding	2.24537	2.60075	5.31e-10	9.2e-09
MRPL38	ENSG00000204316	protein_coding	0.900333	3.25503	5.36e-10	9.28e-09
RBL1	ENSG00000080839	protein_coding	1.24325	4.2466	5.42e-10	9.38e-09
AC004825.2	ENSG00000274818	lincRNA	-1.17995	-1.40489	5.49e-10	9.5e-09
MTMR9	ENSG00000104643	protein_coding	-0.795672	3.59319	5.51e-10	9.53e-09
CUTC	ENSG00000119929	protein_coding	-0.812164	3.82981	5.58e-10	9.64e-09
HIST3H2BB	ENSG00000196890	protein_coding	2.82521	1.21682	5.68e-10	9.81e-09
AC083880.1	ENSG00000273391	antisense	1.75882	-0.333282	5.69e-10	9.82e-09
RSPO1	ENSG00000169218	protein_coding	-2.30006	-1.43834	5.75e-10	9.91e-09
PRKACB	ENSG00000142875	protein_coding	-1.14681	5.43552	5.75e-10	9.91e-09
AC004951.2	ENSG00000239556	transcribed_unprocessed_pseudogene	-1.64885	0.935409	5.76e-10	9.92e-09
TMEM5-AS1	ENSG00000255850	antisense	-2.47418	-3.94263	5.78e-10	9.95e-09
AL132780.5	ENSG00000280129	TEC	1.90798	-1.53318	5.78e-10	9.96e-09
TIAM2	ENSG00000146426	protein_coding	-1.04726	2.61989	5.79e-10	9.97e-09
FAM110B	ENSG00000169122	protein_coding	-1.82745	1.97578	5.91e-10	1.02e-08
LRRTM1	ENSG00000162951	protein_coding	-3.01893	-2.5547	5.92e-10	1.02e-08
MFN2	ENSG00000116688	protein_coding	-0.730687	7.1794	5.93e-10	1.02e-08
PDE7B	ENSG00000171408	protein_coding	-1.6911	2.80919	5.95e-10	1.02e-08
RCBTB2	ENSG00000136161	protein_coding	-1.0522	3.54729	5.96e-10	1.02e-08
HCFC2	ENSG00000111727	protein_coding	-0.859227	3.45026	5.97e-10	1.02e-08
OXSM	ENSG00000151093	protein_coding	0.901609	3.54057	5.98e-10	1.03e-08
TMEM74B	ENSG00000125895	protein_coding	2.89977	2.80448	6.1e-10	1.04e-08
AL161729.2	ENSG00000271314	antisense	3.07379	-1.54269	6.15e-10	1.05e-08
PGS1	ENSG00000087157	protein_coding	0.711241	5.17517	6.15e-10	1.05e-08
ZNF92	ENSG00000146757	protein_coding	1.30572	3.40013	6.17e-10	1.06e-08
FBXL21	ENSG00000164616	transcribed_unitary_pseudogene	-3.68245	-2.89224	6.2e-10	1.06e-08
PYGO2	ENSG00000163348	protein_coding	0.791813	6.37524	6.25e-10	1.07e-08
2022-03-02	ENSG00000099785	protein_coding	-0.826498	4.79827	6.27e-10	1.07e-08
CEP55	ENSG00000138180	protein_coding	1.80163	5.11895	6.42e-10	1.1e-08
BAX	ENSG00000087088	protein_coding	0.965065	6.48798	6.46e-10	1.1e-08
COL4A3BP	ENSG00000113163	protein_coding	-0.78107	5.19315	6.47e-10	1.1e-08
SNHG12	ENSG00000197989	antisense	1.26547	4.65024	6.48e-10	1.11e-08
AC124312.2	ENSG00000257647	lincRNA	-2.1834	-2.98896	6.49e-10	1.11e-08
SEPT7-AS1	ENSG00000228878	lincRNA	-1.07257	-0.330417	6.53e-10	1.11e-08
OR2B6	ENSG00000124657	protein_coding	4.16091	-0.976797	6.55e-10	1.12e-08
ZNF728	ENSG00000269067	protein_coding	-3.01911	-3.42104	6.59e-10	1.12e-08
WDCP	ENSG00000163026	protein_coding	0.925273	3.58046	6.68e-10	1.14e-08
PDXK	ENSG00000160209	protein_coding	1.1811	7.65724	6.73e-10	1.14e-08
AC093510.2	ENSG00000260871	sense_overlapping	-1.63919	-2.83531	6.75e-10	1.15e-08
ITM2A	ENSG00000078596	protein_coding	-2.03666	3.82621	6.86e-10	1.17e-08
EEF1E1	ENSG00000124802	protein_coding	1.00365	3.96337	6.87e-10	1.17e-08
MROH8	ENSG00000101353	protein_coding	-1.22195	0.0418232	6.93e-10	1.18e-08
GTF2A1L	ENSG00000242441	protein_coding	-2.40114	-3.75243	6.94e-10	1.18e-08
AP000553.1	ENSG00000272954	sense_intronic	3.45346	-1.06974	6.94e-10	1.18e-08
CNPY2	ENSG00000257727	protein_coding	1.0706	5.15326	6.96e-10	1.18e-08
KNL1	ENSG00000137812	protein_coding	1.71067	4.24006	7e-10	1.18e-08
MYO18B	ENSG00000133454	protein_coding	-2.5289	0.778755	7e-10	1.18e-08
AL021807.1	ENSG00000272468	lincRNA	2.97539	0.544638	7.01e-10	1.19e-08
TRIM59	ENSG00000213186	protein_coding	1.23441	3.49264	7.04e-10	1.19e-08
ABCA9	ENSG00000154258	protein_coding	-2.09489	2.12152	7.07e-10	1.19e-08
HCN3	ENSG00000143630	protein_coding	1.5914	3.35611	7.08e-10	1.19e-08
CD99L2	ENSG00000102181	protein_coding	-1.18332	5.11229	7.11e-10	1.2e-08
DARS2	ENSG00000117593	protein_coding	1.24653	5.16236	7.12e-10	1.2e-08
PSMB2	ENSG00000126067	protein_coding	0.844599	7.27325	7.13e-10	1.2e-08
GSG2	ENSG00000177602	protein_coding	1.91989	2.03788	7.17e-10	1.21e-08
STRN3	ENSG00000196792	protein_coding	-0.804995	4.79375	7.19e-10	1.21e-08
RN7SL368P	ENSG00000239948	misc_RNA	-1.95697	-3.00347	7.26e-10	1.22e-08
AC233280.1	ENSG00000229178	lincRNA	2.3873	-1.71257	7.27e-10	1.22e-08
AC011298.1	ENSG00000219159	lincRNA	7.65496	-0.960632	7.4e-10	1.24e-08
EVA1C	ENSG00000166979	protein_coding	-1.68549	3.832	7.6e-10	1.28e-08
AL024498.1	ENSG00000272097	lincRNA	1.60525	-0.979634	7.64e-10	1.28e-08
FOXK2	ENSG00000141568	protein_coding	0.653663	6.25745	7.72e-10	1.3e-08
CNTNAP1	ENSG00000108797	protein_coding	-1.33573	3.29048	7.74e-10	1.3e-08
AC018647.1	ENSG00000227544	lincRNA	-1.79646	-2.13868	7.78e-10	1.3e-08
HAUS8	ENSG00000131351	protein_coding	0.962121	3.73334	7.78e-10	1.3e-08
AC123768.1	ENSG00000241818	antisense	4.37368	-3.53738	7.83e-10	1.31e-08
TMEM44	ENSG00000145014	protein_coding	1.27255	4.41356	7.83e-10	1.31e-08
STAM-AS1	ENSG00000260589	antisense	1.89101	-1.11618	7.86e-10	1.32e-08
POLE	ENSG00000177084	protein_coding	1.03514	5.95638	8.09e-10	1.35e-08
LIME1	ENSG00000203896	protein_coding	1.57411	2.1543	8.11e-10	1.36e-08
AC015845.2	ENSG00000265542	lincRNA	-2.07567	-3.6755	8.26e-10	1.38e-08
AC002984.1	ENSG00000267005	processed_pseudogene	-1.92358	-3.96641	8.39e-10	1.4e-08
ZDHHC16	ENSG00000171307	protein_coding	0.763938	5.37075	8.48e-10	1.42e-08
SAMD1	ENSG00000141858	protein_coding	0.940773	6.07802	8.49e-10	1.42e-08
RNF139-AS1	ENSG00000245149	lincRNA	1.3106	1.29207	8.57e-10	1.43e-08
NAP1L3	ENSG00000186310	protein_coding	-1.96529	0.903285	8.58e-10	1.43e-08
RNF115	ENSG00000265491	protein_coding	-0.658193	5.37587	8.66e-10	1.44e-08
PYCR3	ENSG00000104524	protein_coding	1.27585	4.70397	8.66e-10	1.44e-08
HM13	ENSG00000101294	protein_coding	0.933442	7.84461	8.68e-10	1.44e-08
EEF1A1P9	ENSG00000249264	processed_pseudogene	-1.06415	1.48961	8.7e-10	1.45e-08
KIF5B	ENSG00000170759	protein_coding	-0.786796	7.50066	8.78e-10	1.46e-08
RTN4R	ENSG00000040608	protein_coding	2.31115	2.85221	8.93e-10	1.48e-08
COLEC12	ENSG00000158270	protein_coding	-2.0967	3.9428	8.98e-10	1.49e-08
NIT2	ENSG00000114021	protein_coding	0.855932	5.93939	9.05e-10	1.5e-08
LINC00968	ENSG00000246430	lincRNA	-2.32923	-2.1593	9.06e-10	1.5e-08
AC008966.2	ENSG00000272123	antisense	-1.32831	-2.47402	9.07e-10	1.5e-08
LINC02447	ENSG00000245468	lincRNA	-1.58775	-1.92833	9.18e-10	1.52e-08
AL139089.1	ENSG00000273723	lincRNA	1.68466	0.109336	9.25e-10	1.53e-08
MED14OS	ENSG00000234636	antisense	-1.00348	-0.975217	9.29e-10	1.54e-08
SLC8A2	ENSG00000118160	protein_coding	-2.14421	0.83777	9.38e-10	1.55e-08
TCHH	ENSG00000159450	protein_coding	-2.55739	1.99681	9.5e-10	1.57e-08
LONRF1	ENSG00000154359	protein_coding	-1.05537	4.20225	9.52e-10	1.57e-08
AC063944.2	ENSG00000241218	processed_pseudogene	-1.92236	-3.09265	9.54e-10	1.58e-08
SNRPGP9	ENSG00000228551	processed_pseudogene	2.20305	-2.57851	9.61e-10	1.59e-08
AC112777.1	ENSG00000256663	processed_pseudogene	2.24329	-0.0558014	9.66e-10	1.59e-08
SH3BP2	ENSG00000087266	protein_coding	1.06074	6.00646	9.72e-10	1.6e-08
AC008764.6	ENSG00000269399	lincRNA	1.57387	0.355017	9.89e-10	1.63e-08
ZRANB1	ENSG00000019995	protein_coding	-0.93275	3.76306	9.92e-10	1.64e-08
AC131097.4	ENSG00000235151	lincRNA	-2.12776	-3.36443	9.97e-10	1.64e-08
AC026362.1	ENSG00000256028	processed_transcript	1.50333	-0.483744	1.01e-09	1.66e-08
CLN6	ENSG00000128973	protein_coding	1.09032	5.89535	1.01e-09	1.67e-08
TMEM220-AS1	ENSG00000263400	antisense	-1.73803	-1.13943	1.03e-09	1.69e-08
DUSP4	ENSG00000120875	protein_coding	-1.61257	5.98795	1.06e-09	1.75e-08
STC1	ENSG00000159167	protein_coding	-1.72374	5.26835	1.06e-09	1.75e-08
[truncated: 30,840 more rows]
