# Supplementary material for: Construction and experimental validation of a B cell-related gene signature to predict the prognosis and immunotherapeutic sensitivity in bladder cancer
Source: Aging (Albany NY). 2023 Jun 27;15(12):5355–80. doi: 10.18632/aging.204753 (PMC10333061; doi:10.18632/aging.204753)
Supplement: Supplementary Table 6 [file aging-15-204753-s006.xlsx]

## Sheet: Sheet1
Supplementary Table 6. Feature selection via randomforest.
Gene_pair	VIMP
EMP1|ARPC5	0.0043623
ANXA1|SOX4	0.00344227
ANXA1|ABRACL	0.00325305
ANXA1|PSMD4	0.00266507
EMP1|COMT	0.00251585
FCGRT|GAS6	0.00235972
DUSP23|TIMP2	0.00220211
ANXA1|A2M	0.00214577
ANXA1|BTG1	0.00212692
ANXA1|SNRPD2	0.00201476
ABRACL|SSR3	0.00192077
ABRACL|MAP7D1	0.00165764
GLUL|TIMP2	0.00164923
GAS6|CNIH4	0.0015943
ANXA1|CYB5R3	0.00156516
ANXA1|MDK	0.00155956
ETHE1|MAP7D1	0.00149946
EMP1|CLPP	0.00146034
EMP1|MRPL4	0.00145944
CEBPD|CAV1	0.00135311
CALD1|IL32	0.00134246
ANXA1|MYDGF	0.00130795
TPM1|ZNHIT1	0.00128204
EMP1|SLIRP	0.00125936
ANXA1|SEC61A1	0.00123797
ANXA1|MRPS34	0.00122152
ANXA1|TINAGL1	0.00122149
EMP1|PNRC1	0.00121736
CYR61|FCGRT	0.00116831
ABRACL|TMEM179B	0.00116438
ABRACL|PSMD2	0.00110566
EMP1|TMEM258	0.00110375
ANXA1|ADRM1	0.00109575
ANXA1|CLTA	0.0010854
EMP1|MRPL57	0.00108399
EMP1|ID2	0.00104298
GSN|DYNLRB1	0.00103652
ANXA1|ISG15	0.00102394
ABRACL|PHLDA2	0.000991621
EMP1|H2AFY	0.000972803
CXCR4|GAS6	0.000964818
TPM1|MRPL4	0.000962551
BTG1|CSRP1	0.000930792
DUSP23|TGFBI	0.000930143
GSN|DUSP23	0.000917793
ETHE1|SLC16A3	0.000912704
EMP1|PLAUR	0.000901999
ANXA1|TMEM258	0.0008963
GNG11|CPE	0.00088089
ANXA1|IGFBP7	0.000863499
MRPS34|PSMD2	0.00085753
ANXA1|ID2	0.000851022
CLPP|SPARCL1	0.000843798
ANXA1|ZYX	0.000834193
EMP1|ZNHIT1	0.000832699
EMP1|FCGRT	0.000827879
PSMB2|ABRACL	0.000812659
CD52|GAS6	0.0007987
TPM1|CYSTM1	0.00078262
TSC22D1|IL32	0.00076823
ANXA1|NDUFS6	0.000767899
SDF2L1|CTHRC1	0.000759066
ANXA1|DYNLRB1	0.000753526
ANXA1|RALY	0.000751362
TPM1|CNIH4	0.000715379
TSC22D3|GAS6	0.000712759
CD52|TUBB6	0.000711564
EMP1|RCN1	0.00071155
ABRACL|PSMA3	0.00071054
ID2|KLF6	0.000702855
PNRC1|GAS6	0.000685339
CEBPD|CTHRC1	0.000678566
SMIM14|GAS6	0.000646742
GSN|PPP1R15A	0.000643751
ANXA1|SPARCL1	0.000643383
CXCR4|SPARCL1	0.000641208
CLTA|KDELR2	0.000635342
ANXA1|FCGRT	0.000625451
ANXA1|BANF1	0.00062099
RPS3A|ANXA1	0.000614245
PDIA4|KDELR2	0.000610481
PSMA5|SLC16A3	0.000609526
IL32|TMEM258	0.000597685
PSMA2|CPE	0.00059526
JUNB|MMP14	0.000595112
TGFBI|TINAGL1	0.000593504
LMNA|MDK	0.000589971
DUSP23|CTHRC1	0.000589447
EMP1|SDF2L1	0.000586899
IL32|GAS6	0.000577934
ANAPC11|TCEAL4	0.000577014
SPATS2L|CTHRC1	0.000575821
TGFBI|TMEM258	0.000570646
CD52|TPM1	0.000565339
ANXA1|FKBP1A	0.00056489
EMP1|JOSD2	0.000558042
PSMA2|GAS6	0.000547236
ANXA1|PDIA4	0.000543928
MDK|MMP14	0.000540345
GLUL|CAV1	0.000537414
TPM1|MRPL57	0.000535122
EMP1|MVB12A	0.000534541
PSMB2|GLUL	0.000529004
GLUL|SPARCL1	0.000522826
CALD1|SDF2L1	0.00052118
TGFBI|CYSTM1	0.000515312
JUN|ZYX	0.000511507
ANAPC11|CEBPD	0.000509984
ID2|CYR61	0.000506708
EIF1|ISG15	0.000505399
ANXA1|PPIB	0.000503005
ARPC5|SPARCL1	0.000501551
ANXA1|UBE2L6	0.000491471
CAV1|TBCB	0.000489535
SLC16A3|CYSTM1	0.000489367
CEBPD|SLC16A3	0.000486755
TSC22D1|CNIH4	0.000485122
CSRP1|COMT	0.000483842
DSTN|ANXA1	0.000481464
ANXA1|AP2S1	0.000479705
CEBPD|A2M	0.000479021
TGFBI|IL32	0.000476514
ANXA1|GGCT	0.000475168
JUN|TCEAL4	0.000474491
GLUL|KLF6	0.000472167
CD52|EMP1	0.000464105
ANXA1|ATP6AP1	0.000462787
FKBP2|CAV1	0.000462334
CEBPD|TGFBI	0.000457751
JUN|AP2S1	0.000456395
LMNA|ANXA1	0.000454841
IFI6|ANXA1	0.000452745
TGFBI|COMT	0.000451695
BTG1|SPARCL1	0.000446266
CEBPD|TMEM258	0.000445136
ANAPC11|TPM1	0.000442633
GSN|CLPP	0.000442248
GLUL|PSMA3	0.000441291
CYR61|TIMM13	0.000440056
CYBA|CLPP	0.000439723
TGFBI|MRPL17	0.000439566
FCGRT|SPARCL1	0.000432954
TUBB6|SDF2L1	0.000431875
YPEL5|SPARCL1	0.00043088
ANXA1|EIF6	0.000429972
CEBPD|ARPC5	0.000427622
EIF1|LGALS3BP	0.000419995
CPE|RNASET2	0.000412893
ABRACL|A2M	0.000411733
FUNDC2|CPE	0.000409716
CALD1|EMP1	0.000408006
IL32|CTHRC1	0.000404769
DUSP23|SPARCL1	0.000404109
ANXA1|MRPL51	0.0004036
CALD1|SOX4	0.000400536
EMP1|CYSTM1	0.000399729
CXCR4|EMP1	0.000399688
CLPP|PPP1R15A	0.000398947
TUBB6|IL32	0.000397984
LMNA|UBE2L6	0.000397528
GNG11|RNASET2	0.000394218
CEBPD|PDLIM7	0.000389576
RPS3A|MDK	0.000389511
CAV1|RCN1	0.000388004
TBCB|TMEM258	0.000387865
GLUL|TMEM258	0.000383385
GSN|RALY	0.000382057
SDF2L1|PDLIM7	0.000378285
GLUL|TMEM179B	0.000378112
TGFBI|SSR3	0.000374688
DUSP23|TCEAL4	0.000373786
ABRACL|GGCT	0.000372208
TGFBI|ATP6AP1	0.000369009
LTB|TIMP3	0.000366149
CALD1|MVB12A	0.000365968
MDK|KDELR2	0.000365017
IL32|ZNHIT1	0.000359567
CSRP1|ETHE1	0.000358063
BTG1|CTHRC1	0.000357051
FUNDC2|GAS6	0.000356874
FCGRT|SDF2L1	0.000355292
PSMB2|A2M	0.000352198
CD52|SPARCL1	0.000349792
UBE2L6|KDELR2	0.000347983
MYL9|JOSD2	0.000344187
PDIA4|MRPL51	0.000342087
MVB12A|IL32	0.000340129
CAV1|C1R	0.000339784
GSN|TCEAL4	0.000338291
CSRP1|YPEL5	0.00033408
EMP1|CNIH4	0.000333709
PSMA5|TIMP2	0.000332475
TSC22D3|EMP1	0.000332063
CEBPD|CSRP1	0.00033168
GLUL|SSR3	0.000331529
ANXA1|MLF2	0.000329161
ID2|TUBB6	0.000328256
CPE|HAPLN3	0.000327006
GSN|COMT	0.000326552
ANXA1|PSMB5	0.000326416
MYDGF|ABRACL	0.000325178
TCEAL4|TIMP2	0.000322796
TGFBI|CTSC	0.000322414
GSN|ATP6AP1	0.000317506
DYNLRB1|CAV1	0.000316548
TIMP2|SLIRP	0.000316191
CD52|CALD1	0.000315466
IFI6|ABRACL	0.00031439
ANXA1|ACTN1	0.000310612
ID2|GAS6	0.000310062
DUSP1|LMNA	0.000309697
CD52|CFH	0.000306561
UBE2L6|MRPL51	0.000304426
DUSP1|UBE2L6	0.000303102
ID2|CPE	0.000302597
COMT|CTHRC1	0.000302575
PDIA6|KDELR2	0.000302292
CALD1|ZNHIT1	0.000301677
TGFBI|PSMD2	0.000300673
PSMB2|GGCT	0.000299392
CEBPD|TCEAL4	0.000298201
ANAPC11|ID2	0.000297685
CYR61|YPEL5	0.000297221
PDIA4|A2M	0.000294821
CEBPD|CLPP	0.000293723
GSN|MRPL17	0.000293312
MRPS34|PDIA6	0.000292578
EMP1|TIMP2	0.000292282
SMIM14|PHLDA1	0.000292249
CYR61|PDIA4	0.00029163
NDUFS6|TGFBI	0.000290657
PSMA5|IL32	0.000290623
SOX4|GAS6	0.000289277
RPS3A|MYL9	0.000288712
ANXA1|PPP1R15A	0.000285557
ACTN1|DUSP23	0.000284755
CAV1|CLTA	0.000283661
ABRACL|YPEL5	0.00028317
CLU|UBE2L6	0.000282398
CALD1|PDLIM7	0.000281594
PSMA5|MRPL17	0.000281471
ABRACL|STOM	0.000280437
GGCT|MLF2	0.000279444
TSC22D3|CLPP	0.000278912
DUSP1|ANXA1	0.000277133
ID2|CTSC	0.000277097
JOSD2|CTHRC1	0.000276083
CYB5R3|TIMP2	0.000275389
COMT|IL32	0.000275017
CLTA|PDIA6	0.000274171
PLAUR|SPARCL1	0.00027393
MAP7D1|C7orf73	0.000273461
RALY|CAV1	0.000273398
GAS6|CYSTM1	0.000271053
P4HB|MDK	0.000269482
RNASET2|GAS6	0.000268847
ANAPC11|GLUL	0.000268262
GLUL|A2M	0.00026781
JOSD2|PDLIM7	0.000267463
EMP1|C1R	0.000265371
CSRP1|SDF2L1	0.000264581
ANXA1|MYL9	0.000263899
ID2|MVB12A	0.000263284
SOX4|CTHRC1	0.000262321
SMIM14|TIMP2	0.000261407
UBE2L6|PSMB5	0.000261197
CALD1|PLAUR	0.000260087
CXCR4|PMP22	0.00025916
TSPAN4|FUNDC2	0.000258678
TUBB6|TIMP2	0.000258606
IFI27|MDK	0.000257754
DUSP23|TUBB6	0.000255974
MRPS34|MMP14	0.000255542
DUSP1|DYNLRB1	0.00025512
KDELR2|C1R	0.000254913
FKBP2|TGFBI	0.000254114
KDELR2|SEC61A1	0.000254011
IER3|SPARCL1	0.000249082
GLUL|PSMD2	0.000248837
CYB5R3|TUBB6	0.00024755
ZYX|C1R	0.000247479
ANXA1|IER3	0.000245239
FCGRT|CRTAP	0.000243662
MRPS34|CLTA	0.000241353
FOSB|IL32	0.000241129
COMT|SLC16A3	0.000240823
JUN|ETHE1	0.000240803
SLC16A3|RCN1	0.000240676
SDF2L1|SPARCL1	0.000240442
IL32|C7orf73	0.000239499
ACTN1|PSMA5	0.000238757
TUBB6|GGCT	0.000238507
SOX4|CRTAP	0.000238495
RALY|CTSC	0.000238386
TINAGL1|TMEM258	0.000238096
GNG11|FUNDC2	0.00023803
GSN|PSMA5	0.000238011
TSPAN4|PSMA2	0.000238009
RALY|TGFBI	0.000237631
ID2|CSRP1	0.000237094
ID2|PSMA5	0.000236973
SPARCL1|MRPL57	0.000236866
SMIM14|NFIC	0.000236836
IL32|CPE	0.000235607
TPM1|ID2	0.000235548
ID2|SSR3	0.000234946
MYDGF|MMP14	0.000234755
UBE2L6|CRTAP	0.000234049
PMP22|MRPL4	0.000231909
CAV1|IL32	0.00023083
MAP7D1|PPP1R15A	0.000229228
ACTN1|IL32	0.000227792
SPATS2L|TIMP2	0.000227252
ID2|TIMP2	0.00022693
CYBA|MYDGF	0.000226699
CALD1|ACTN1	0.000226034
TPM1|ARPC5	0.000225688
CD52|TGFBI	0.000225425
FCGRT|MRPL4	0.000224721
GLUL|MAP7D1	0.00022431
SMIM14|ID2	0.000223504
ADRM1|C1R	0.000222058
FOSB|UBE2L6	0.00022144
ILK|CFH	0.000221242
HLA-C|P4HB	0.000220133
IER3|TIMP2	0.000219825
ISG15|PDIA6	0.000219284
SOX4|IER3	0.000218415
TMEM179B|IL32	0.000218211
CYR61|ABRACL	0.000218
IL32|SLIRP	0.000216059
FCGRT|PHLDA2	0.000214704
PHLDA1|HAPLN3	0.000214588
TSC22D3|PSMA3	0.000214495
CD52|PMP22	0.000213757
UBE2L6|GGCT	0.00021295
CRTAP|CYSTM1	0.000212364
PSMB5|TIMP2	0.000212073
LMNA|PSMB5	0.000210621
CALD1|RCN1	0.000210365
PNRC1|CSRP1	0.000209533
SOX4|CSRP1	0.000209223
STOM|TMEM258	0.0002091
CXCR4|COMT	0.000209066
JUNB|PPIB	0.000208216
PNRC1|CMTM3	0.000207963
ANAPC11|TIMP2	0.000207954
RCN1|IL32	0.000206452
CYR61|GGCT	0.000206055
MYL9|PSMA3	0.000206012
PMP22|IL32	0.000205653
ANXA1|YPEL5	0.000205367
SMIM14|TPM1	0.00020491
CAV1|MRPS34	0.000204833
PHLDA1|ZNHIT1	0.000204677
TUBB6|PDLIM7	0.000203753
MDK|PDIA4	0.000203687
TIMP2|GGCT	0.000203635
CYR61|CRTAP	0.000203314
TUBB6|FUNDC2	0.000203208
JOSD2|COMT	0.00020261
SLC16A3|IL32	0.00020145
JOSD2|IL32	0.000200248
LTB|GNG11	0.000200059
BTG1|IL32	0.000200028
DUSP1|PSMB2	0.000199914
ANXA1|ARPC5	0.000199234
PSMA2|CTHRC1	0.000198854
PDLIM7|CTHRC1	0.00019798
ABRACL|TIMP2	0.000197919
CYR61|MRPL57	0.000197399
C1R|MLF2	0.00019729
TIMP2|IL32	0.000196682
SERPINH1|ANXA1	0.00019625
ABRACL|TGFBI	0.000196153
CYBA|ABRACL	0.000194886
CYR61|AP2S1	0.000194564
GSN|ABRACL	0.000192984
SMIM14|SLC16A3	0.000192977
CEBPD|SPARCL1	0.000192601
TIMM13|TMEM179B	0.00019157
TCEAL4|CLTA	0.000191506
RPS3A|ISG15	0.000191473
EIF6|SNRPD2	0.00019112
DYNLRB1|TIMP2	0.000190089
CALD1|CRTAP	0.000189791
CD48|POU2F2	0.000188433
CYR61|UBE2L6	0.000188226
UBC|MDK	0.000186948
FOSB|ACTN1	0.000186618
ID2|CRTAP	0.000186331
PSMD4|PPP1R15A	0.000186245
GSN|TIMP2	0.000185586
TIMM13|CAV1	0.000185026
ACAP1|ILK	0.000184754
CSRP1|RCN1	0.000184213
MYL9|KLF6	0.000183957
CALD1|CFH	0.000183787
TPM1|CRTAP	0.000183726
CYR61|RCN1	0.000183595
TIMM13|ABRACL	0.000183481
ANAPC11|YPEL5	0.000183431
CXCR4|CD52	0.000182727
PSMB2|YPEL5	0.000182401
DSTN|CYR61	0.000182274
BANK1|RHOH	0.000182209
NR4A2|CTHRC1	0.000181534
NFIC|HAPLN3	0.000181375
SOX4|GGCT	0.000180885
IER3|CYSTM1	0.000180869
EIF1|UBC	0.000180836
CYBA|ANXA1	0.000180757
GSN|PSMB2	0.000180187
SOX4|ATP6AP1	0.000179804
CALD1|JOSD2	0.000178644
FCGRT|TMEM179B	0.000178633
MYDGF|COMT	0.000177666
CRTAP|TMEM258	0.0001772
TGFBI|TMEM179B	0.00017661
ANXA1|CYR61	0.000176366
SOX4|C1R	0.000175899
DUSP1|RCN1	0.0001758
CALD1|RALY	0.000174632
MDK|MLF2	0.00017339
SOX4|CLPP	0.000173303
TIMP2|CTSC	0.000172974
TCEAL4|TMEM179B	0.000172938
PSMB5|C1R	0.00017281
TUBB6|TMEM179B	0.000172593
ABRACL|CTHRC1	0.000172553
CXCR4|TPM1	0.000171785
TPM1|CMTM3	0.000171326
TGFBI|CYB5R3	0.000170256
SMIM14|CALD1	0.00016938
CXCR4|CRTAP	0.000169186
DYNLRB1|COMT	0.000168148
ISG15|GLUL	0.000167917
JUN|CAV1	0.000167692
SMIM14|CTHRC1	0.000167592
SPATS2L|TPM1	0.000167426
CRTAP|C1R	0.000167329
MYL9|C1R	0.000166871
CEBPD|PSMA5	0.000166825
JUNB|SEC61A1	0.000166654
TSC22D1|EMP1	0.000166455
PHLDA1|TMEM258	0.000166019
RHOH|IL16	0.000165959
TIMM13|A2M	0.00016542
PSMB2|FCGRT	0.000164899
JUN|TIMM13	0.000164875
YPEL5|PSMA3	0.000164388
CMTM3|ETHE1	0.000164258
LTB|CPE	0.000164171
CRTAP|SPARCL1	0.000163513
ANXA1|MMP14	0.000163216
ANAPC11|IL32	0.000162767
RNASET2|CTHRC1	0.000162128
JUN|BANF1	0.000161627
ID2|TMEM179B	0.000161491
COMT|TMEM258	0.000161243
SEPT6|ILK	0.000160959
EMP1|PSMA5	0.000160814
RALY|YPEL5	0.000160501
BTG1|FKBP2	0.000160127
ANXA1|TBCB	0.000159921
PLAUR|IL32	0.000159241
CALD1|CAV1	0.000158907
CTSC|MRPL17	0.000157751
IFI6|BANF1	0.000157738
MYDGF|KDELR2	0.000157699
UBE2L6|CAV1	0.000157068
CAV1|A2M	0.000156831
MRPL4|PDLIM7	0.000156751
GLUL|CTHRC1	0.000156337
SPATS2L|SPARCL1	0.000156042
BTG1|SLC16A3	0.000155925
CLU|CTSC	0.00015512
CLPP|PDLIM7	0.000154925
ID2|RCN1	0.000154854
SOX4|SLC16A3	0.000153635
TMEM258|CTHRC1	0.000153581
BTG1|TGFBI	0.000153462
TBCB|MRPL17	0.000153261
MRPS34|KDELR2	0.000152258
CMTM3|C1R	0.00015202
MYL9|PDIA4	0.000151561
YPEL5|CTSC	0.000151552
FCGRT|C7orf73	0.000151198
PNRC1|C1R	0.000151193
CYBA|KDELR2	0.000151169
TPM1|SLIRP	0.000150994
TSC22D3|CEBPD	0.000150925
TSC22D3|SMIM14	0.000150857
JUN|CEBPD	0.000150179
BTG1|CRTAP	0.000149977
PSMB2|JUN	0.000149657
A2M|CTHRC1	0.000149464
IL32|CTSC	0.000149379
MAP7D1|MRPL17	0.000148594
UBE2L6|PDIA6	0.000148404
COMT|CRTAP	0.000148272
PHLDA1|TIMP2	0.000147632
SSR3|CTHRC1	0.000147507
DUSP1|AP2S1	0.000146937
TCEAL4|CTHRC1	0.000145928
YPEL5|CRTAP	0.000145216
ID2|ARPC5	0.000144824
GSN|ETHE1	0.000144525
A2M|ADRM1	0.000144282
PSMA2|HAPLN3	0.000144197
MRPS34|MLF2	0.000144089
FKBP2|PHLDA2	0.000143989
CYBA|JUN	0.000143867
FOSB|MAP7D1	0.000143657
CYR61|DUSP23	0.000143288
ID2|CFH	0.000143212
BTG1|GGCT	0.000142801
ISG15|P4HB	0.000142273
DSTN|PDIA4	0.000142266
AP2S1|MRPS34	0.000141982
ABRACL|SDF2L1	0.000141783
NUCB2|CPE	0.000141726
ARPC5|SLIRP	0.000141657
IL32|CYSTM1	0.000141456
PMP22|CTSC	0.000141437
TBCB|SLC16A3	0.00014118
ETHE1|CLPP	0.000141009
TGFBI|C1R	0.000140396
MMP14|TINAGL1	0.000140324
GLUL|RCN1	0.000140086
GSN|CYB5R3	0.000139651
CLU|PDLIM7	0.000139532
PLAUR|CLU	0.000139474
TIMP2|PSMA3	0.000138858
TGFBI|TCEAL4	0.000138854
UBE2L6|CSRP1	0.000138808
ANAPC11|GAS6	0.000138587
CEBPD|TIMP2	0.00013843
CPE|CNIH4	0.000137715
A2M|GGCT	0.000137494
TPM1|PDLIM7	0.000137359
CALD1|ETHE1	0.000137017
A2M|MRPL17	0.000136971
CYR61|PSMB5	0.000136572
LMNA|CYR61	0.000136468
ACTN1|COMT	0.000136429
CTSC|CYSTM1	0.000136391
KLF6|TUBB6	0.000136078
A2M|CTSC	0.00013599
JUN|C1R	0.000135762
ETHE1|TINAGL1	0.000135689
CLU|CTHRC1	0.00013548
TMEM179B|RCN1	0.000134932
MYL9|FCGRT	0.000134881
CAV1|PHLDA2	0.000134396
CALD1|TIMM13	0.000134382
CAV1|ABRACL	0.000134188
CXCR4|TUBB6	0.000134077
PHLDA2|ZNHIT1	0.000133879
FCGRT|MAP7D1	0.000133623
COMT|ATP6AP1	0.00013362
ANAPC11|CYB5R3	0.000133577
FCGRT|MRPL57	0.000133529
PSMB2|TIMP2	0.000133406
TIMP2|C1R	0.000133345
CYB5R3|SDF2L1	0.000133037
CYBA|A2M	0.000132705
TIMP2|CYSTM1	0.000132459
GSN|UBE2L6	0.00013232
COMT|GGCT	0.000132163
PDIA4|MLF2	0.000132158
CYR61|TBCB	0.000132083
SLC16A3|PHLDA2	0.000131918
IFI27|MMP14	0.00013103
CYBA|ACTN1	0.000130961
PDIA6|A2M	0.00013068
STOM|PPP1R15A	0.000130468
DUSP23|TMEM179B	0.00013038
TIMP2|CTHRC1	0.00013034
DUSP1|YPEL5	0.000129988
CSRP1|MRPL57	0.000129955
SDF2L1|CTSC	0.000129903
ISG15|PPIB	0.000129834
PMP22|SDF2L1	0.000129669
DUSP1|ETHE1	0.000129548
TIMP2|CLPP	0.000129508
CSRP1|ZNHIT1	0.000129212
PHLDA1|ID2	0.000129161
PHLDA1|MRPL57	0.000129114
BTG1|PNRC1	0.000128758
FOSB|CSRP1	0.000128277
ID2|TMEM258	0.000128221
SPATS2L|FCGRT	0.000128205
SLC16A3|SLIRP	0.000127965
CD52|CTSC	0.000127517
NDUFS6|MYDGF	0.000127321
GSN|GLUL	0.000126506
TGFBI|GGCT	0.000126448
IER3|PPP1R15A	0.000126346
A2M|PSMA3	0.000126083
CYR61|PPP1R15A	0.000125897
TIMP2|MRPL57	0.000124737
SERPINH1|C1R	0.000124058
TGFBI|KLF6	0.000124027
ZNHIT1|PDLIM7	0.000124008
YPEL5|C1R	0.000123936
EMP1|TGFBI	0.000123836
ISG15|CLTA	0.000123787
ISG15|ADRM1	0.000123732
PSMA5|PDLIM7	0.000123628
KLF6|MRPL4	0.000123057
CTHRC1|CYSTM1	0.000122991
TMEM258|PPP1R15A	0.000122786
CALD1|CYSTM1	0.000122349
TUBB6|TCEAL4	0.000122271
CLPP|A2M	0.000122257
ABRACL|TUBB6	0.000122044
RPS19|ISG15	0.000121651
TUBB6|YPEL5	0.000121533
TSC22D1|ZNHIT1	0.000121394
LTB|RNASET2	0.000121373
FCGRT|PSMA3	0.000121271
SOX4|CYSTM1	0.000120997
CYBA|SPARCL1	0.000120678
LMNA|A2M	0.000120615
ANAPC11|TUBB6	0.000120447
KLF6|CRTAP	0.000120399
SPATS2L|CAV1	0.000120221
RALY|PPP1R15A	0.000120105
GLUL|UBE2L6	0.00011971
RALY|CYB5R3	0.000118912
CD52|MVB12A	0.000118526
FUNDC2|CTHRC1	0.000118256
LMNA|IER3	0.000118208
CAV1|KLF6	0.000117791
RPS3A|BANF1	0.000117724
ANXA1|C1R	0.000117276
FOSB|STOM	0.000117233
TINAGL1|PHLDA2	0.000116947
ETHE1|MRPL17	0.000116911
TPM1|SDF2L1	0.000116835
UBE2L6|ADRM1	0.000116828
PNRC1|PDLIM7	0.000116251
MYDGF|SOX4	0.000116151
DUSP1|CYB5R3	0.000116049
BTG1|TIMP2	0.000115994
CD52|CMTM3	0.000115945
JUN|MRPL17	0.000115789
ANXA1|SDF2L1	0.000115746
RALY|ACTN1	0.000115435
SOX4|PHLDA2	0.000115419
CEBPD|ABRACL	0.000115353
SERPINH1|IER3	0.000115322
GSN|SOX4	0.000115244
CYR61|MLF2	0.000115193
PSMD2|GGCT	0.000115132
RHOH|TIMP3	0.000115085
DYNLRB1|CYR61	0.00011465
TGFBI|SLC16A3	0.000114542
TSPAN4|NUCB2	0.000114476
SDF2L1|GAS6	0.000114465
STOM|ETHE1	0.000113963
IFI27|CYR61	0.000113861
BTG1|MAP7D1	0.000113643
SEC61A1|ADRM1	0.000113384
COMT|ARPC5	0.000113176
TPM1|C7orf73	0.000113165
CALD1|PSMA3	0.000112994
DSTN|EZR	0.000112802
TBCB|TUBB6	0.000112679
JUNB|EZR	0.000112653
ANXA1|PDIA6	0.000112418
SOX4|ARPC5	0.000112003
CSRP1|PPP1R15A	0.000111905
ZNHIT1|C7orf73	0.000111883
ACAP1|TBC1D10C	0.000111872
CD52|C7orf73	0.000111744
RALY|CTHRC1	0.000111635
H2AFY|FCGRT	0.00011159
JUN|MMP14	0.000111572
GNG11|GAS6	0.00011143
GGCT|C1R	0.00011138
TSC22D1|MAP7D1	0.000111038
CYR61|ARPC5	0.000110818
RALY|GLUL	0.000110536
CYR61|SSR3	0.000110478
TCEAL4|ATP6AP1	0.000110374
PSMB5|ADRM1	0.000109962
GNG11|HAPLN3	0.000109796
CYBA|CEBPD	0.00010891
CAV1|TINAGL1	0.000108534
IFI6|GLUL	0.00010849
ANXA1|PNRC1	0.000108449
DUSP23|MAP7D1	0.000108211
BTG1|PPP1R15A	0.000108107
EMP1|TPM1	0.000108067
ACTN1|MAP7D1	0.000108009
H2AFY|ID2	0.000107309
CAV1|FCGRT	0.00010703
ABRACL|MRPL17	0.00010697
MRPL4|SPARCL1	0.000106683
AP2S1|UBE2L6	0.000106648
CYBA|IER3	0.000106631
FKBP2|CEBPD	0.000106112
FOSB|CNIH4	0.000105849
ILK|TIMP3	0.000105787
TSC22D3|COMT	0.00010573
IFI27|STOM	0.000105563
CLU|JOSD2	0.000105513
MYDGF|GGCT	0.000105342
TSC22D3|ANXA1	0.000105099
SSR3|ATP6AP1	0.000104851
EMP1|PDLIM7	0.000104727
ACTN1|PNRC1	0.00010453
PSMA3|PDLIM7	0.000104264
TMEM258|MRPL57	0.000104171
SOX4|MRPL17	0.000103244
TIMP2|PSMD2	0.000103146
TGFBI|IER3	0.000103097
ACTN1|SSR3	0.000102945
CLPP|ARPC5	0.00010253
SOX4|CTSC	0.000102469
CLU|MLF2	0.000102251
CYR61|SLIRP	0.000102158
EIF1|MDK	0.000102095
ANXA1|CRTAP	0.000102073
SPATS2L|EMP1	0.00010181
CEBPD|TMEM179B	0.000101723
CXCR4|TBCB	0.000101211
TIMM13|CTHRC1	0.000101116
CYBA|KLF6	0.000101113
SPATS2L|ID2	0.00010105
CD79B|NR4A2	0.000100974
STOM|CLPP	0.000100875
GNG11|NFIC	0.000100741
GLUL|YPEL5	0.000100644
UBC|SNRPD2	0.000100596
KLF6|CTSC	0.000100557
ANXA1|TIMP2	0.00010038
CYBA|TMEM258	0.000100266
CMTM3|RCN1	0.000100266
PSMB5|MMP14	9.99e-05
CXCR4|MRPL17	9.99e-05
BTG1|IER3	9.98e-05
STOM|JOSD2	9.97e-05
COMT|SPARCL1	9.97e-05
TIMP2|MRPL17	9.96e-05
PSMA5|SPARCL1	9.92e-05
GLUL|TGFBI	9.9e-05
PSMB2|CSRP1	9.87e-05
CEBPD|GGCT	9.86e-05
GGCT|ZYX	9.86e-05
CYBA|C1R	9.84e-05
ANAPC11|C1R	9.83e-05
LGALS3BP|MMP14	9.78e-05
TUBB6|MRPL57	9.78e-05
SOX4|PNRC1	9.76e-05
SMIM14|HAPLN3	9.74e-05
PNRC1|PHLDA2	9.73e-05
CAV1|MRPL4	9.7e-05
YPEL5|CTHRC1	9.67e-05
ACTN1|TBCB	9.65e-05
DSTN|LMNA	9.64e-05
CMTM3|FCGRT	9.64e-05
CAV1|PSMA3	9.62e-05
PMP22|MVB12A	9.61e-05
GLUL|TIMM13	9.59e-05
ID2|MRPL17	9.59e-05
IFI27|PSMA3	9.58e-05
PNRC1|TMEM179B	9.54e-05
TIMP2|A2M	9.53e-05
GSN|GGCT	9.51e-05
JOSD2|GAS6	9.51e-05
RALY|COMT	9.51e-05
CXCR4|CTHRC1	9.49e-05
MYL9|GLUL	9.49e-05
EMP1|SLC16A3	9.48e-05
SLC16A3|CLPP	9.48e-05
MRPL51|C1R	9.47e-05
CAV1|PSMD4	9.43e-05
PMP22|PSMA3	9.43e-05
ISG15|CLU	9.41e-05
SLC16A3|TIMP2	9.38e-05
PSMB2|CAV1	9.37e-05
TGFBI|CSRP1	9.37e-05
CSRP1|CYSTM1	9.31e-05
CYBA|SERPINH1	9.3e-05
PSMB2|TGFBI	9.28e-05
SOX4|CMTM3	9.27e-05
DUSP1|ISG15	9.27e-05
PSMB2|ACTN1	9.27e-05
GAS6|CFH	9.26e-05
PDIA4|ZYX	9.24e-05
IER3|PDIA4	9.22e-05
GSN|ANXA1	9.21e-05
GAS6|HAPLN3	9.2e-05
NFIC|GAS6	9.17e-05
IER3|FCGRT	9.17e-05
FOSB|SDF2L1	9.13e-05
CAV1|PDLIM7	9.12e-05
CXCR4|TGFBI	9.1e-05
CD52|CTHRC1	9.1e-05
TSC22D3|IL32	9.09e-05
BTG1|TBCB	9.04e-05
IFI27|TUBB6	9.04e-05
CLPP|PHLDA2	9e-05
DYNLRB1|MRPS34	8.99e-05
PLAUR|FCGRT	8.99e-05
IER3|SSR3	8.99e-05
SMIM14|MVB12A	8.97e-05
TSC22D3|CALD1	8.97e-05
CD79A|CD48	8.94e-05
TCEAL4|PPP1R15A	8.94e-05
PNRC1|CRTAP	8.94e-05
CYBA|TBCB	8.94e-05
DYNLRB1|KDELR2	8.93e-05
MYL9|PSMD2	8.92e-05
PSMD4|TIMP2	8.91e-05
PMP22|FUNDC2	8.87e-05
CLU|SLC16A3	8.86e-05
CEBPD|C1R	8.85e-05
CAV1|ARPC5	8.84e-05
SLC16A3|MRPL17	8.81e-05
JUN|SPARCL1	8.8e-05
GAS6|SLIRP	8.8e-05
EMP1|IL32	8.74e-05
FOSB|SOX4	8.74e-05
CEBPD|ATP6AP1	8.72e-05
ID2|C7orf73	8.7e-05
CAV1|CLPP	8.7e-05
PPIB|SNRPD2	8.68e-05
GSN|FKBP2	8.67e-05
CYR61|ZNHIT1	8.67e-05
PSMA5|CTSC	8.65e-05
PSMA5|PHLDA2	8.64e-05
CAV1|MAP7D1	8.63e-05
FOSB|CTHRC1	8.6e-05
PLAUR|ZNHIT1	8.59e-05
SOX4|TGFBI	8.57e-05
ABRACL|TCEAL4	8.57e-05
PHLDA1|ETHE1	8.56e-05
PSMA5|UBE2L6	8.54e-05
MDK|CYR61	8.53e-05
TBCB|RCN1	8.51e-05
TCEAL4|CTSC	8.51e-05
GLUL|PDIA6	8.51e-05
DUSP1|SNRPD2	8.48e-05
SEPT6|HAPLN3	8.48e-05
TPM1|GAS6	8.44e-05
IFI6|SERPINH1	8.42e-05
SOX4|ACTN1	8.41e-05
TBCB|ARPC5	8.36e-05
CXCR4|RCN1	8.36e-05
IL32|MRPL17	8.36e-05
NUCB2|GAS6	8.34e-05
MYL9|TBCB	8.34e-05
TMEM258|PSMA3	8.34e-05
CTSC|TMEM258	8.33e-05
SMIM14|CAV1	8.33e-05
ABRACL|CYB5R3	8.32e-05
IFI27|SNRPD2	8.31e-05
SLIRP|CTHRC1	8.31e-05
BTG1|PSMA5	8.28e-05
UBE2L6|CLPP	8.28e-05
DSTN|BANF1	8.27e-05
TBCB|TMEM179B	8.26e-05
PSMB2|TINAGL1	8.26e-05
EMP1|MRPL17	8.25e-05
CXCR4|CLPP	8.25e-05
CLU|TIMP2	8.23e-05
H2AFY|GAS6	8.22e-05
JUN|ISG15	8.21e-05
CYB5R3|ETHE1	8.2e-05
ETHE1|C1R	8.2e-05
ETHE1|PSMA3	8.19e-05
DSTN|MYDGF	8.19e-05
PSMD2|ADRM1	8.16e-05
CALD1|COMT	8.15e-05
PDIA4|SNRPD2	8.15e-05
EMP1|CFH	8.13e-05
PSMB2|CTHRC1	8.13e-05
ACTN1|TUBB6	8.13e-05
JUN|MYDGF	8.1e-05
GSN|BTG1	8.1e-05
MYDGF|IER3	8.09e-05
AP2S1|STOM	8.06e-05
ACTN1|CYSTM1	8.05e-05
IFI27|PSMA5	8.05e-05
EMP1|SPARCL1	7.99e-05
TIMM13|PPP1R15A	7.97e-05
SOX4|TCEAL4	7.96e-05
SMIM14|ACTN1	7.95e-05
CD52|ARPC5	7.92e-05
CALD1|MRPL4	7.9e-05
RALY|PSMD2	7.9e-05
EMP1|CMTM3	7.85e-05
ANXA1|PSMD2	7.82e-05
TBCB|TCEAL4	7.82e-05
MRPL57|PDLIM7	7.81e-05
IER3|ATP6AP1	7.8e-05
MDK|EZR	7.8e-05
CYBA|RCN1	7.78e-05
JUNB|MDK	7.76e-05
BTG1|TUBB6	7.76e-05
ACTN1|PPP1R15A	7.75e-05
UBE2L6|STOM	7.74e-05
FCGRT|SLC16A3	7.72e-05
JOSD2|YPEL5	7.71e-05
MMP14|KDELR2	7.7e-05
DUSP23|KDELR2	7.69e-05
JUNB|PDIA4	7.69e-05
CXCR4|BTG1	7.67e-05
AP2S1|COMT	7.67e-05
CMTM3|CYSTM1	7.66e-05
IFI27|COMT	7.66e-05
IL32|CFH	7.65e-05
PLAUR|PDLIM7	7.65e-05
GAS6|PDLIM7	7.63e-05
ISG15|PSMB5	7.63e-05
CD52|FUNDC2	7.61e-05
CLTA|PPP1R15A	7.61e-05
UBE2L6|MAP7D1	7.6e-05
H2AFY|CAV1	7.6e-05
ILK|HAPLN3	7.56e-05
TIMM13|MRPL17	7.54e-05
JUN|RCN1	7.52e-05
TMEM258|PHLDA2	7.51e-05
CXCR4|H2AFY	7.5e-05
ANAPC11|RCN1	7.49e-05
TCEAL4|ZYX	7.48e-05
AP2S1|A2M	7.47e-05
CMTM3|ARPC5	7.47e-05
MDK|ZYX	7.47e-05
PMP22|SPARCL1	7.44e-05
NFIC|CTHRC1	7.42e-05
MYL9|TCEAL4	7.4e-05
PHLDA2|C1R	7.37e-05
ANXA1|CLU	7.35e-05
JUN|MYL9	7.34e-05
TBCB|PDLIM7	7.32e-05
KLF6|ETHE1	7.31e-05
DUSP1|PSMA3	7.28e-05
ANAPC11|SPARCL1	7.28e-05
PSMA5|YPEL5	7.27e-05
ANAPC11|MRPL57	7.25e-05
ETHE1|PDLIM7	7.25e-05
TIMP2|MRPL51	7.22e-05
MYDGF|MYL9	7.21e-05
GSN|SLC16A3	7.21e-05
FOSB|C1R	7.21e-05
MDK|SNRPD2	7.2e-05
TGFBI|PDIA6	7.2e-05
CD52|PSMA5	7.19e-05
MRPL4|CFH	7.18e-05
CLPP|SSR3	7.16e-05
GSN|DUSP1	7.15e-05
CEBPD|CLU	7.15e-05
TPM1|CLU	7.14e-05
CMTM3|JOSD2	7.13e-05
PNRC1|CLU	7.13e-05
RALY|C1R	7.13e-05
CRTAP|MRPL17	7.12e-05
DUSP1|PSMD2	7.12e-05
EIF6|SEC61A1	7.12e-05
TPM1|SPARCL1	7.11e-05
PHLDA1|CRTAP	7.1e-05
RPS19|JUNB	7.1e-05
PMP22|FCGRT	7.1e-05
GSN|ID2	7.09e-05
TCEAL4|MRPL17	7.09e-05
JUN|CYB5R3	7.09e-05
TUBB6|GAS6	7.08e-05
JOSD2|CLPP	7.07e-05
IER3|PHLDA2	7.06e-05
STOM|PSMB5	7.05e-05
PSMB5|MLF2	7.04e-05
TUBB6|PSMA3	7.04e-05
PLAUR|CPE	7.03e-05
PSMB2|TMEM179B	7.02e-05
PLAUR|TGFBI	7.02e-05
H2AFY|SPARCL1	7e-05
PHLDA2|SPARCL1	6.99e-05
GLUL|C1R	6.98e-05
SOX4|MYL9	6.98e-05
CSRP1|CTSC	6.96e-05
LTB|NFIC	6.95e-05
SERPINH1|ZYX	6.94e-05
MYDGF|C1R	6.91e-05
IFI6|PSMD2	6.91e-05
IFI6|NDUFS6	6.89e-05
TIMP2|YPEL5	6.88e-05
TIMM13|PSMD2	6.88e-05
PSMB2|MRPL17	6.87e-05
IGFBP7|ADRM1	6.87e-05
JUN|TMEM258	6.86e-05
TCEAL4|YPEL5	6.86e-05
PNRC1|C7orf73	6.85e-05
ISG15|MRPS34	6.85e-05
CMTM3|CNIH4	6.83e-05
SSR3|CYSTM1	6.82e-05
RCN1|CTHRC1	6.8e-05
PMP22|IFI27	6.8e-05
NFIC|GPR183	6.8e-05
RCN1|TIMP2	6.79e-05
TUBB6|CRTAP	6.78e-05
GLUL|PHLDA2	6.77e-05
SNRPD2|TINAGL1	6.77e-05
RCN1|C7orf73	6.76e-05
CYR61|MRPL51	6.72e-05
FKBP2|CLTA	6.72e-05
MRPL51|PSMD2	6.7e-05
DUSP1|CYR61	6.69e-05
CAV1|SSR3	6.68e-05
TUBB6|FCGRT	6.68e-05
ANAPC11|IER3	6.68e-05
NDUFS6|GLUL	6.67e-05
DUSP1|CLTA	6.66e-05
NDUFS6|STOM	6.65e-05
CALD1|PPP1R15A	6.64e-05
NFIC|CNIH4	6.64e-05
BTG1|COMT	6.63e-05
PSMB2|ANAPC11	6.61e-05
PMP22|SLIRP	6.57e-05
TPM1|MVB12A	6.56e-05
FOSB|C7orf73	6.55e-05
BTG1|YPEL5	6.55e-05
ANXA1|GLUL	6.52e-05
MYL9|CRTAP	6.52e-05
NFIC|PDLIM7	6.51e-05
GSN|CYSTM1	6.48e-05
PDIA4|SEC61A1	6.45e-05
NUCB2|HAPLN3	6.45e-05
POU2F2|RHOH	6.45e-05
CYB5R3|A2M	6.45e-05
IGFBP7|LGALS3BP	6.44e-05
CYBA|PNRC1	6.43e-05
MYDGF|TIMP2	6.43e-05
MYL9|PSMD4	6.42e-05
SDF2L1|TINAGL1	6.41e-05
DUSP1|CEBPD	6.41e-05
CTSC|CRTAP	6.4e-05
IGFBP7|EIF6	6.4e-05
GSN|SLIRP	6.39e-05
KLF6|TBCB	6.37e-05
CYB5R3|TINAGL1	6.37e-05
IGFBP7|UBC	6.35e-05
KLF6|CTHRC1	6.34e-05
IL16|TIMP3	6.34e-05
CALD1|YPEL5	6.33e-05
TMEM258|CYSTM1	6.31e-05
TIMM13|PDIA6	6.3e-05
CD52|JOSD2	6.28e-05
PSMD4|ZYX	6.28e-05
PLAUR|RNASET2	6.28e-05
MRPL51|PDIA6	6.27e-05
FKBP2|ABRACL	6.25e-05
TMEM179B|PSMD2	6.25e-05
ANXA1|COMT	6.25e-05
CYBA|RALY	6.24e-05
MYL9|PSMA5	6.23e-05
GLUL|CLU	6.23e-05
NR4A2|CPE	6.21e-05
PDLIM7|CYSTM1	6.21e-05
COMT|CLPP	6.21e-05
FKBP2|CYR61	6.19e-05
PHLDA1|CNIH4	6.19e-05
SERPINH1|UBE2L6	6.18e-05
CSRP1|MAP7D1	6.17e-05
SPATS2L|CMTM3	6.15e-05
ABRACL|COMT	6.14e-05
JUN|PSMB5	6.12e-05
CLTA|MRPL51	6.12e-05
ID2|PSMA3	6.12e-05
CYBA|TMEM179B	6.1e-05
DUSP23|ABRACL	6.09e-05
ANAPC11|SLC16A3	6.08e-05
IFI27|TIMP2	6.06e-05
TSC22D1|CAV1	6.04e-05
PSMB2|TBCB	6.03e-05
SEPT6|CPE	6.03e-05
PMP22|TPM1	6.02e-05
ACTN1|ETHE1	6e-05
PMP22|CAV1	5.99e-05
ANAPC11|TMEM179B	5.98e-05
DUSP1|KDELR2	5.97e-05
CFH|HAPLN3	5.94e-05
PMP22|CLU	5.93e-05
CXCR4|ETHE1	5.93e-05
UBE2L6|PHLDA2	5.88e-05
NDUFS6|IER3	5.85e-05
TPM1|H2AFY	5.85e-05
RPS19|IFI6	5.85e-05
DYNLRB1|C1R	5.85e-05
DUSP1|BANF1	5.84e-05
PMP22|COMT	5.84e-05
CD48|ACAP1	5.84e-05
TSC22D1|CEBPD	5.84e-05
SOX4|CYR61	5.81e-05
ISG15|MRPL51	5.81e-05
COMT|FCGRT	5.81e-05
GSN|TINAGL1	5.78e-05
CLPP|CTSC	5.77e-05
TIMM13|ZYX	5.76e-05
CLPP|CTHRC1	5.76e-05
CYBA|MRPL51	5.75e-05
KLF6|PSMD2	5.72e-05
CSRP1|IL32	5.71e-05
SLIRP|PDLIM7	5.71e-05
BANF1|PSMB5	5.69e-05
SMIM14|CFH	5.69e-05
ARPC5|CTHRC1	5.67e-05
ISG15|CYR61	5.65e-05
PSMA3|CTHRC1	5.64e-05
GSN|RCN1	5.64e-05
CLU|MVB12A	5.64e-05
UBE2L6|MLF2	5.63e-05
TCEAL4|TMEM258	5.62e-05
SERPINH1|MYDGF	5.62e-05
LTB|GPR183	5.6e-05
NUCB2|CFH	5.6e-05
ANAPC11|CLU	5.6e-05
MYL9|ZYX	5.59e-05
ANXA1|PHLDA2	5.57e-05
KLF6|SLC16A3	5.56e-05
CALD1|SPARCL1	5.54e-05
FCGRT|SLIRP	5.54e-05
DUSP1|SSR3	5.52e-05
UBC|EIF6	5.52e-05
H2AFY|CTHRC1	5.52e-05
PLAUR|FUNDC2	5.5e-05
PDIA6|MLF2	5.5e-05
PMP22|YPEL5	5.49e-05
CLTA|MMP14	5.49e-05
ISG15|FKBP1A	5.47e-05
PSMB2|JOSD2	5.47e-05
CMTM3|CLPP	5.47e-05
SOX4|CAV1	5.47e-05
IFI27|ZYX	5.46e-05
STOM|ATP6AP1	5.46e-05
TIMM13|ETHE1	5.45e-05
CPE|CTHRC1	5.44e-05
RALY|PNRC1	5.43e-05
CTSC|CTHRC1	5.43e-05
CEBPD|TUBB6	5.42e-05
PNRC1|JOSD2	5.41e-05
CEBPD|RCN1	5.41e-05
SPARCL1|SLIRP	5.41e-05
IL32|RNASET2	5.4e-05
PSMB2|MAP7D1	5.4e-05
C7orf73|MRPL57	5.37e-05
PHLDA1|CPE	5.37e-05
GSN|ARPC5	5.37e-05
DYNLRB1|TINAGL1	5.36e-05
AP2S1|ABRACL	5.34e-05
TUBB6|SSR3	5.34e-05
PSMA5|COMT	5.28e-05
PHLDA2|PPP1R15A	5.28e-05
IFI27|PDLIM7	5.28e-05
ETHE1|TMEM258	5.28e-05
C1R|ATP6AP1	5.28e-05
JOSD2|ARPC5	5.28e-05
SEPT6|NUCB2	5.27e-05
TSC22D1|PHLDA1	5.26e-05
CRTAP|PHLDA2	5.25e-05
LTB|PLAUR	5.25e-05
MYDGF|DYNLRB1	5.25e-05
ACTN1|ID2	5.23e-05
RALY|ID2	5.22e-05
YPEL5|SDF2L1	5.22e-05
TSC22D1|JOSD2	5.22e-05
TSC22D3|TBCB	5.22e-05
JUN|GGCT	5.21e-05
TSC22D3|RCN1	5.21e-05
TSC22D3|TPM1	5.2e-05
TGFBI|PSMA3	5.2e-05
TSC22D3|ID2	5.19e-05
DUSP1|TBCB	5.17e-05
CYBA|PPP1R15A	5.16e-05
TGFBI|C7orf73	5.15e-05
TPM1|PNRC1	5.15e-05
TPM1|CTSC	5.15e-05
FOSB|PLAUR	5.14e-05
SPARCL1|CTHRC1	5.13e-05
EMP1|TBCB	5.11e-05
ISG15|MLF2	5.11e-05
TGFBI|TUBB6	5.1e-05
IFI27|TMEM258	5.09e-05
IGFBP7|DUSP23	5.09e-05
ANXA1|JOSD2	5.07e-05
TUBB6|CTHRC1	5.06e-05
GNG11|GPR183	5.02e-05
SDF2L1|CYSTM1	5.01e-05
IER3|C1R	5e-05
GLUL|MRPL51	4.98e-05
IER3|YPEL5	4.98e-05
PSMB5|PDIA6	4.98e-05
DYNLRB1|CLTA	4.97e-05
DSTN|A2M	4.97e-05
IFI27|TINAGL1	4.96e-05
CRTAP|GAS6	4.95e-05
PMP22|SOX4	4.95e-05
SSR3|PSMA3	4.93e-05
JUN|MDK	4.91e-05
C7orf73|MRPL17	4.91e-05
SEPT6|CFH	4.9e-05
PMP22|PLAUR	4.87e-05
TBCB|CTSC	4.87e-05
MDK|BANF1	4.87e-05
CYBA|MLF2	4.86e-05
A2M|MLF2	4.86e-05
MMP14|SEC61A1	4.85e-05
CYR61|COMT	4.85e-05
CLPP|C1R	4.84e-05
DYNLRB1|UBE2L6	4.82e-05
TPM1|CTHRC1	4.81e-05
PNRC1|TBCB	4.8e-05
TGFBI|ZNHIT1	4.8e-05
TCEAL4|PHLDA2	4.79e-05
CD79B|ILK	4.79e-05
BANF1|ADRM1	4.77e-05
ANAPC11|TMEM258	4.74e-05
CLU|TGFBI	4.74e-05
SMIM14|H2AFY	4.73e-05
STOM|SPARCL1	4.72e-05
CYBA|GSN	4.7e-05
SERPINH1|CYR61	4.69e-05
JUN|CLTA	4.68e-05
PNRC1|SLC16A3	4.68e-05
IER3|CLPP	4.68e-05
TBCB|CRTAP	4.67e-05
ID2|CEBPD	4.67e-05
MAP7D1|SDF2L1	4.66e-05
SLC16A3|TMEM258	4.66e-05
MYL9|PSMB5	4.65e-05
PLAUR|CTSC	4.64e-05
SERPINH1|CEBPD	4.63e-05
SPATS2L|GAS6	4.61e-05
EMP1|PHLDA1	4.6e-05
JUN|CYR61	4.6e-05
GAS6|PHLDA2	4.6e-05
JUN|PPP1R15A	4.59e-05
CYB5R3|PSMA3	4.59e-05
CD48|ILK	4.58e-05
KLF6|MRPL17	4.56e-05
SPARCL1|PDLIM7	4.56e-05
MYDGF|PSMB5	4.55e-05
TSC22D3|MRPL4	4.55e-05
DUSP1|IER3	4.53e-05
PSMB2|FKBP2	4.53e-05
CD48|NR4A2	4.52e-05
MAP7D1|TINAGL1	4.52e-05
PNRC1|CAV1	4.51e-05
CD52|PSMA2	4.51e-05
STOM|MRPL17	4.49e-05
PPIB|MYL9	4.48e-05
UBE2L6|A2M	4.48e-05
PSMB5|SEC61A1	4.48e-05
TIMM13|TINAGL1	4.46e-05
PPP1R15A|CTHRC1	4.46e-05
RCN1|YPEL5	4.46e-05
BTG1|PHLDA2	4.46e-05
TIMM13|TIMP2	4.44e-05
IFI27|EZR	4.43e-05
AP2S1|PSMB5	4.43e-05
SDF2L1|SSR3	4.42e-05
JOSD2|FCGRT	4.42e-05
DYNLRB1|IER3	4.42e-05
CAV1|MRPL17	4.41e-05
PNRC1|SSR3	4.41e-05
ID2|HAPLN3	4.41e-05
MRPS34|A2M	4.4e-05
IL32|MRPL57	4.39e-05
UBE2L6|SDF2L1	4.39e-05
ISG15|EIF6	4.38e-05
RALY|PDIA6	4.37e-05
SPARCL1|C7orf73	4.36e-05
MDK|AP2S1	4.36e-05
CPE|PDLIM7	4.36e-05
IFI6|MLF2	4.35e-05
FOSB|SLC16A3	4.34e-05
ANAPC11|SSR3	4.34e-05
RALY|A2M	4.33e-05
CXCR4|SDF2L1	4.33e-05
H2AFY|CTSC	4.33e-05
ETHE1|MRPL57	4.32e-05
MYL9|EZR	4.32e-05
ETHE1|IL32	4.32e-05
LTB|HAPLN3	4.3e-05
TGFBI|ARPC5	4.3e-05
PNRC1|UBE2L6	4.29e-05
IFI27|JOSD2	4.29e-05
SDF2L1|IL32	4.27e-05
CTSC|MRPL57	4.26e-05
PMP22|MAP7D1	4.26e-05
TIMP2|ATP6AP1	4.25e-05
TPM1|PSMA5	4.24e-05
FCGRT|A2M	4.24e-05
CD52|PLAUR	4.23e-05
STOM|CLTA	4.22e-05
RCN1|MRPL4	4.21e-05
CMTM3|SPARCL1	4.21e-05
CXCR4|PDLIM7	4.2e-05
JUN|NDUFS6	4.19e-05
CALD1|TMEM179B	4.17e-05
CTSC|RNASET2	4.16e-05
ARPC5|C1R	4.16e-05
PLAUR|JOSD2	4.15e-05
CYR61|JOSD2	4.15e-05
CYB5R3|RCN1	4.15e-05
PMP22|CALD1	4.14e-05
TGFBI|MAP7D1	4.13e-05
GLUL|MRPL17	4.13e-05
DUSP1|IGFBP7	4.12e-05
ANAPC11|EMP1	4.12e-05
CLU|DUSP23	4.12e-05
CMTM3|PHLDA2	4.12e-05
CLPP|GAS6	4.12e-05
ETHE1|ATP6AP1	4.11e-05
CAV1|PDIA6	4.1e-05
IFI27|CALD1	4.1e-05
SOX4|ID2	4.08e-05
PMP22|TGFBI	4.08e-05
JUN|KLF6	4.07e-05
CLU|PDIA6	4.06e-05
NUCB2|RNASET2	4.06e-05
ISG15|KDELR2	4.06e-05
ANAPC11|MYL9	4.06e-05
CAV1|CYSTM1	4.04e-05
JUN|ATP6AP1	4.04e-05
ACTN1|CLU	4.03e-05
BANK1|ILK	4.03e-05
CMTM3|KLF6	4.02e-05
ID2|A2M	4.02e-05
CLU|PDIA4	4.01e-05
ANXA1|TSC22D1	4.01e-05
NDUFS6|TCEAL4	4e-05
BTG1|CLU	4e-05
TSC22D3|ZNHIT1	4e-05
ARPC5|GAS6	3.99e-05
ABRACL|ATP6AP1	3.97e-05
CYBA|MRPS34	3.96e-05
SMIM14|PDLIM7	3.96e-05
PSMB2|PHLDA2	3.95e-05
BANF1|A2M	3.95e-05
SLC16A3|TMEM179B	3.95e-05
MYL9|IER3	3.94e-05
CAV1|CMTM3	3.94e-05
FCGRT|IL32	3.94e-05
CD79A|NUCB2	3.93e-05
CSRP1|TMEM258	3.93e-05
SLC16A3|ZNHIT1	3.92e-05
PHLDA1|CSRP1	3.92e-05
C7orf73|CYSTM1	3.91e-05
CD52|RNASET2	3.9e-05
GLUL|MRPS34	3.89e-05
CD79A|TSPAN4	3.89e-05
BTG1|ARPC5	3.88e-05
MAP7D1|MRPL57	3.87e-05
H2AFY|SLC16A3	3.85e-05
CMTM3|NFIC	3.84e-05
ILK|FCMR	3.84e-05
NDUFS6|CLU	3.82e-05
BTG1|SLIRP	3.82e-05
CYBA|GGCT	3.82e-05
SEC61A1|EZR	3.81e-05
SPATS2L|MRPL4	3.8e-05
ANAPC11|COMT	3.78e-05
KLF6|SPARCL1	3.77e-05
UBE2L6|SPARCL1	3.77e-05
TMEM258|SPARCL1	3.76e-05
DUSP1|JUN	3.76e-05
CYR61|ETHE1	3.76e-05
CLU|PSMA5	3.75e-05
ETHE1|FCGRT	3.74e-05
GNG11|PLAUR	3.74e-05
PSMA5|GAS6	3.72e-05
ANAPC11|C7orf73	3.7e-05
CALD1|CEBPD	3.68e-05
TSC22D1|SOX4	3.67e-05
STOM|C7orf73	3.67e-05
MAP7D1|ZNHIT1	3.67e-05
BTG1|C7orf73	3.66e-05
MYL9|CLPP	3.66e-05
ETHE1|TIMP2	3.65e-05
RPS3A|MMP14	3.64e-05
PHLDA1|RCN1	3.64e-05
TUBB6|MRPL17	3.62e-05
BANK1|CD48	3.61e-05
MYL9|CTSC	3.6e-05
LMNA|MMP14	3.59e-05
TMEM179B|CYSTM1	3.58e-05
DYNLRB1|PDIA6	3.58e-05
CAV1|SPARCL1	3.58e-05
PHLDA1|CYSTM1	3.57e-05
MYL9|CYR61	3.57e-05
UBE2L6|SSR3	3.57e-05
MYDGF|GLUL	3.56e-05
PHLDA2|CYSTM1	3.56e-05
IFI6|MMP14	3.56e-05
CYBA|MRPL17	3.55e-05
UBE2L6|YPEL5	3.55e-05
PNRC1|TUBB6	3.55e-05
PHLDA1|CFH	3.54e-05
KLF6|TCEAL4	3.52e-05
CALD1|TUBB6	3.52e-05
CLU|CLTA	3.52e-05
DSTN|ADRM1	3.52e-05
IFI27|CMTM3	3.51e-05
LMNA|SNRPD2	3.51e-05
BTG1|CEBPD	3.51e-05
TMEM179B|MRPL57	3.51e-05
CNIH4|HAPLN3	3.49e-05
PSMA5|TGFBI	3.48e-05
IFI27|YPEL5	3.46e-05
ILK|CPE	3.44e-05
ARPC5|A2M	3.44e-05
DUSP1|ANAPC11	3.44e-05
JUN|PDIA6	3.42e-05
GLUL|PSMD4	3.41e-05
SMIM14|PLAUR	3.41e-05
FKBP2|SPARCL1	3.41e-05
ABRACL|ETHE1	3.41e-05
MRPL51|ADRM1	3.4e-05
TPM1|TGFBI	3.4e-05
CXCR4|CFH	3.37e-05
PNRC1|SPARCL1	3.37e-05
MRPL4|C7orf73	3.35e-05
DUSP1|C1R	3.35e-05
PHLDA1|FCGRT	3.35e-05
SLC16A3|C1R	3.34e-05
ETHE1|RCN1	3.34e-05
SOX4|PPP1R15A	3.34e-05
PDIA4|TINAGL1	3.33e-05
COMT|CLTA	3.33e-05
FCGRT|ZNHIT1	3.32e-05
ACTN1|CRTAP	3.31e-05
CYBA|PSMD4	3.31e-05
RALY|TMEM258	3.31e-05
IGFBP7|PSMD2	3.31e-05
TSC22D1|SPATS2L	3.3e-05
GLUL|CYB5R3	3.3e-05
DUSP1|PPIB	3.3e-05
IFI6|JUN	3.3e-05
GSN|TMEM258	3.29e-05
TMEM179B|A2M	3.29e-05
COMT|TIMP2	3.28e-05
CAV1|SLIRP	3.27e-05
NDUFS6|ADRM1	3.25e-05
JUN|STOM	3.25e-05
H2AFY|C1R	3.25e-05
PHLDA1|MVB12A	3.23e-05
TPM1|JOSD2	3.22e-05
CYB5R3|PSMD2	3.21e-05
BTG1|RCN1	3.2e-05
TSC22D3|SOX4	3.19e-05
NDUFS6|CEBPD	3.19e-05
CNIH4|SPARCL1	3.19e-05
MYL9|CLU	3.18e-05
MRPS34|C1R	3.17e-05
CYBA|STOM	3.17e-05
UBE2L6|CYSTM1	3.17e-05
ACTN1|ARPC5	3.16e-05
BTG1|CTSC	3.15e-05
TSC22D1|PHLDA2	3.14e-05
GLUL|COMT	3.14e-05
DUSP23|SSR3	3.13e-05
IFI6|PPIB	3.13e-05
DYNLRB1|PSMB5	3.13e-05
STOM|C1R	3.1e-05
DUSP1|PPP1R15A	3.09e-05
KLF6|MAP7D1	3.08e-05
FCGRT|TMEM258	3.07e-05
TINAGL1|EZR	3.06e-05
STOM|MLF2	3.04e-05
JUN|SEC61A1	3.04e-05
PMP22|H2AFY	3.04e-05
AP2S1|ZYX	3.03e-05
MAP7D1|SPARCL1	3.03e-05
MVB12A|SPARCL1	3.03e-05
STOM|TCEAL4	3.03e-05
MYL9|MRPL57	3.01e-05
MRPL17|CYSTM1	3e-05
RPS3A|EIF6	3e-05
IER3|KDELR2	3e-05
SDF2L1|PPP1R15A	3e-05
IER3|MRPS34	3e-05
MAP7D1|A2M	2.99e-05
TPM1|FCGRT	2.99e-05
PPP1R15A|MRPL57	2.99e-05
CTHRC1|ATP6AP1	2.99e-05
CAV1|ATP6AP1	2.98e-05
SPATS2L|MVB12A	2.98e-05
IL32|PDLIM7	2.97e-05
PSMB2|PNRC1	2.96e-05
CALD1|KLF6	2.95e-05
CAV1|STOM	2.94e-05
PMP22|JOSD2	2.94e-05
KLF6|RCN1	2.94e-05
PSMD2|A2M	2.93e-05
DUSP23|ADRM1	2.91e-05
JUN|ADRM1	2.91e-05
YPEL5|PHLDA2	2.91e-05
PSMB5|KDELR2	2.9e-05
YPEL5|PDIA6	2.9e-05
EZR|FKBP1A	2.9e-05
CTSC|PSMA3	2.9e-05
CTSC|SSR3	2.89e-05
MYDGF|STOM	2.89e-05
TBCB|CLPP	2.88e-05
FOSB|PDLIM7	2.88e-05
TIMM13|IER3	2.88e-05
KLF6|SLIRP	2.87e-05
SDF2L1|CRTAP	2.87e-05
SEPT6|TSPAN4	2.87e-05
TSC22D1|ANAPC11	2.87e-05
IGFBP7|PSMD4	2.85e-05
FKBP2|MRPL51	2.85e-05
CALD1|NFIC	2.85e-05
IL32|PHLDA2	2.83e-05
PLAUR|CNIH4	2.83e-05
CXCR4|SLIRP	2.81e-05
IGFBP7|EZR	2.81e-05
TIMM13|TGFBI	2.8e-05
IFI27|MVB12A	2.79e-05
TMEM258|SSR3	2.78e-05
DYNLRB1|FKBP2	2.77e-05
COMT|MRPL57	2.77e-05
FCGRT|RCN1	2.77e-05
LY9|RIC3	2.77e-05
SPARCL1|CYSTM1	2.76e-05
IFI27|MAP7D1	2.76e-05
DUSP1|FKBP1A	2.75e-05
LMNA|JUN	2.74e-05
JUN|TINAGL1	2.74e-05
MRPS34|TIMP2	2.74e-05
CEBPD|MRPL57	2.74e-05
ANAPC11|ETHE1	2.74e-05
IER3|COMT	2.73e-05
MYL9|STOM	2.73e-05
ARPC5|CYSTM1	2.73e-05
CMTM3|GAS6	2.73e-05
ID2|STOM	2.73e-05
KDELR2|ADRM1	2.72e-05
CLPP|C7orf73	2.71e-05
TCEAL4|MAP7D1	2.71e-05
BTG1|CAV1	2.7e-05
C1R|CYSTM1	2.7e-05
FKBP2|CTHRC1	2.69e-05
BTG1|MRPL57	2.69e-05
PSMD2|ATP6AP1	2.68e-05
IFI27|ID2	2.67e-05
RALY|ATP6AP1	2.67e-05
PSMB2|KLF6	2.66e-05
IFI6|FKBP1A	2.66e-05
PMP22|TUBB6	2.66e-05
CALD1|CLPP	2.65e-05
NDUFS6|TIMM13	2.65e-05
PHLDA1|PDLIM7	2.64e-05
TINAGL1|MRPL17	2.63e-05
MDK|IER3	2.63e-05
CEBPD|ETHE1	2.62e-05
PSMD2|TINAGL1	2.62e-05
CALD1|CLU	2.62e-05
GSN|C1R	2.62e-05
UBE2L6|IER3	2.62e-05
PMP22|SLC16A3	2.61e-05
UBE2L6|KLF6	2.58e-05
PHLDA1|TBCB	2.58e-05
TGFBI|ETHE1	2.57e-05
KLF6|CLPP	2.56e-05
IFI27|PPIB	2.55e-05
MYL9|YPEL5	2.54e-05
MYL9|ARPC5	2.54e-05
CLPP|YPEL5	2.54e-05
TIMM13|MAP7D1	2.54e-05
CYB5R3|YPEL5	2.53e-05
TGFBI|STOM	2.53e-05
STOM|TBCB	2.53e-05
SMIM14|GPR183	2.53e-05
MYL9|TMEM258	2.53e-05
PNRC1|TGFBI	2.52e-05
COMT|TMEM179B	2.51e-05
PNRC1|H2AFY	2.51e-05
PSMB2|SSR3	2.51e-05
TSC22D1|PDLIM7	2.49e-05
TGFBI|PDLIM7	2.48e-05
ZNHIT1|CTHRC1	2.48e-05
CSRP1|CRTAP	2.48e-05
LMNA|PDIA4	2.48e-05
ZYX|ATP6AP1	2.47e-05
CSRP1|TMEM179B	2.47e-05
DYNLRB1|ABRACL	2.47e-05
CD52|IL32	2.47e-05
ANAPC11|SDF2L1	2.46e-05
TGFBI|FUNDC2	2.46e-05
IGFBP7|AP2S1	2.46e-05
IFI27|CEBPD	2.46e-05
ISG15|LGALS3BP	2.45e-05
SLC16A3|MRPL57	2.45e-05
IER3|STOM	2.43e-05
KLF6|ATP6AP1	2.43e-05
EIF1|EIF6	2.42e-05
PNRC1|CLPP	2.41e-05
PHLDA2|SLIRP	2.41e-05
ZNHIT1|SPARCL1	2.4e-05
H2AFY|CPE	2.4e-05
MYDGF|ZYX	2.4e-05
SMIM14|GNG11	2.4e-05
ABRACL|C1R	2.38e-05
ABRACL|IER3	2.38e-05
CYBA|CTHRC1	2.38e-05
DUSP23|MMP14	2.37e-05
GLUL|SDF2L1	2.37e-05
PNRC1|CTSC	2.36e-05
CYBA|ATP6AP1	2.36e-05
JUNB|IGFBP7	2.36e-05
PNRC1|TMEM258	2.36e-05
CYR61|SLC16A3	2.35e-05
NDUFS6|SOX4	2.35e-05
EEF1A1|HLA-C	2.34e-05
CAV1|PSMD2	2.33e-05
KDELR2|FKBP1A	2.33e-05
TSC22D3|C7orf73	2.32e-05
TPM1|CLPP	2.32e-05
SERPINH1|CLU	2.32e-05
TSC22D3|JOSD2	2.32e-05
MYL9|RCN1	2.31e-05
PHLDA1|TUBB6	2.29e-05
CRTAP|SLIRP	2.29e-05
CYR61|PSMA5	2.29e-05
ETHE1|GGCT	2.29e-05
CD69|ILK	2.28e-05
IFI27|EMP1	2.27e-05
CYBA|FCGRT	2.27e-05
ISG15|ZYX	2.27e-05
SLC16A3|ARPC5	2.27e-05
IFI27|KLF6	2.26e-05
FOSB|SSR3	2.26e-05
CYR61|TCEAL4	2.26e-05
DSTN|ZYX	2.24e-05
MAP7D1|CTSC	2.24e-05
PSMA5|RCN1	2.24e-05
ID2|PDLIM7	2.24e-05
SPATS2L|CFH	2.23e-05
FOSB|MRPL4	2.23e-05
PNRC1|TIMP2	2.22e-05
TSC22D3|C1R	2.22e-05
SMIM14|SPARCL1	2.22e-05
CYB5R3|TBCB	2.22e-05
RALY|TINAGL1	2.21e-05
TINAGL1|GGCT	2.21e-05
GSN|TMEM179B	2.21e-05
TBCB|SDF2L1	2.19e-05
STOM|MRPS34	2.19e-05
CD69|NR4A2	2.19e-05
STOM|ZNHIT1	2.19e-05
TMEM179B|MRPL17	2.18e-05
MRPL4|ZNHIT1	2.18e-05
BANK1|CD69	2.18e-05
ANAPC11|MRPL17	2.18e-05
CLU|GGCT	2.16e-05
CLU|CRTAP	2.16e-05
ANAPC11|CAV1	2.16e-05
FCGRT|ARPC5	2.16e-05
PSMD4|C1R	2.16e-05
GSN|MAP7D1	2.15e-05
CEBPD|KLF6	2.15e-05
CALD1|MAP7D1	2.14e-05
DSTN|IFI6	2.14e-05
CXCR4|IFI27	2.13e-05
CXCR4|CYSTM1	2.13e-05
CD52|H2AFY	2.12e-05
JUNB|SNRPD2	2.12e-05
ACTN1|TIMM13	2.12e-05
PPIB|PDIA4	2.12e-05
CLU|ZNHIT1	2.11e-05
DSTN|MMP14	2.11e-05
MAP7D1|TIMP2	2.11e-05
IER3|MRPL17	2.11e-05
CMTM3|ZNHIT1	2.1e-05
CSRP1|FCGRT	2.09e-05
CLU|MRPL4	2.09e-05
TPM1|NFIC	2.08e-05
PSMB2|SDF2L1	2.08e-05
DSTN|JUN	2.07e-05
SPARCL1|PPP1R15A	2.07e-05
KLF6|C1R	2.07e-05
PSMB2|COMT	2.07e-05
IFI27|GAS6	2.06e-05
CYB5R3|JOSD2	2.06e-05
KLF6|GGCT	2.05e-05
HLA-C|IFI6	2.05e-05
UBE2L6|ZNHIT1	2.05e-05
TIMP2|SDF2L1	2.05e-05
TSC22D3|CRTAP	2.04e-05
CD52|ZNHIT1	2.04e-05
PSMB2|ETHE1	2.03e-05
FKBP2|MRPS34	2.03e-05
IER3|MLF2	2.03e-05
TUBB6|MAP7D1	2.01e-05
KLF6|CSRP1	2e-05
CYBA|CYB5R3	2e-05
SLC16A3|CRTAP	1.99e-05
CD79A|CFH	1.99e-05
KLF6|PHLDA2	1.98e-05
TSC22D1|TIMP2	1.98e-05
NR4A2|CFH	1.98e-05
SERPINH1|TINAGL1	1.97e-05
RALY|CEBPD	1.97e-05
ISG15|EZR	1.97e-05
FOSB|PSMA5	1.97e-05
CLU|STOM	1.97e-05
CYBA|ANAPC11	1.95e-05
JUN|FKBP1A	1.94e-05
BTG1|CYB5R3	1.93e-05
CMTM3|MVB12A	1.93e-05
PSMB2|CLU	1.93e-05
SPATS2L|C7orf73	1.93e-05
ANAPC11|A2M	1.93e-05
TSC22D1|RCN1	1.92e-05
IER3|SDF2L1	1.91e-05
CD52|HAPLN3	1.9e-05
PHLDA1|NFIC	1.89e-05
PHLDA1|PSMA5	1.87e-05
ID2|SLIRP	1.87e-05
PLAUR|NFIC	1.85e-05
CYR61|CYSTM1	1.85e-05
CLTA|A2M	1.85e-05
IFI6|UBC	1.85e-05
SOX4|KLF6	1.84e-05
BANK1|CD79B	1.82e-05
LMNA|GLUL	1.82e-05
LTB|ILK	1.82e-05
PHLDA1|MAP7D1	1.82e-05
CMTM3|MRPL57	1.81e-05
SPATS2L|C1R	1.8e-05
RALY|CYR61	1.8e-05
SERPINH1|PSMD4	1.8e-05
CYR61|C1R	1.8e-05
TSC22D1|CTHRC1	1.79e-05
STOM|CSRP1	1.79e-05
TINAGL1|C1R	1.79e-05
IFI6|KDELR2	1.77e-05
BANF1|SEC61A1	1.76e-05
MMP14|EZR	1.76e-05
PDIA4|EIF6	1.75e-05
BTG1|PDLIM7	1.74e-05
MRPL57|SSR3	1.73e-05
TSC22D3|ETHE1	1.73e-05
CD79B|CD69	1.73e-05
MAP7D1|C1R	1.72e-05
JOSD2|SLC16A3	1.71e-05
SERPINH1|JUN	1.71e-05
LMNA|FKBP1A	1.71e-05
TSC22D3|MVB12A	1.7e-05
MRPL51|MLF2	1.69e-05
ACTN1|CAV1	1.69e-05
GAS6|C7orf73	1.69e-05
FOSB|PHLDA2	1.68e-05
CD52|CYSTM1	1.68e-05
JOSD2|CTSC	1.68e-05
AP2S1|PSMD2	1.68e-05
TSC22D1|ARPC5	1.67e-05
IER3|CYB5R3	1.67e-05
CYR61|MRPL4	1.66e-05
PMP22|TBCB	1.65e-05
UBE2L6|C7orf73	1.64e-05
TCEAL4|SDF2L1	1.64e-05
ETHE1|ARPC5	1.63e-05
CYBA|GLUL	1.63e-05
ID2|YPEL5	1.63e-05
CAV1|PPP1R15A	1.62e-05
IFI27|SLC16A3	1.61e-05
PHLDA1|C7orf73	1.61e-05
TIMP2|C7orf73	1.61e-05
SMIM14|CPE	1.6e-05
PMP22|CLPP	1.6e-05
NUCB2|PSMA2	1.59e-05
PABPC1|IFI6	1.58e-05
KLF6|PSMA3	1.56e-05
CALD1|GAS6	1.55e-05
MRPL4|C1R	1.55e-05
RPS19|EEF2	1.55e-05
GGCT|SPARCL1	1.54e-05
DUSP23|MLF2	1.54e-05
CYR61|TINAGL1	1.53e-05
ACTN1|C1R	1.53e-05
DUSP1|RALY	1.53e-05
ID2|MRPL4	1.52e-05
TIMM13|SSR3	1.52e-05
DUSP1|A2M	1.51e-05
ILK|GPR183	1.5e-05
DUSP23|UBE2L6	1.49e-05
PDIA6|ATP6AP1	1.49e-05
PSMA5|C1R	1.48e-05
GAS6|ZNHIT1	1.48e-05
PNRC1|TINAGL1	1.48e-05
CYBA|MRPL57	1.48e-05
RCN1|CTSC	1.48e-05
ID2|CYSTM1	1.47e-05
UBE2L6|CTHRC1	1.47e-05
ANAPC11|PSMA5	1.47e-05
TGFBI|PPP1R15A	1.47e-05
SOX4|UBE2L6	1.46e-05
KDELR2|A2M	1.46e-05
TSC22D1|TUBB6	1.45e-05
ANXA1|ZNHIT1	1.45e-05
RALY|TIMM13	1.45e-05
MYDGF|MRPL51	1.45e-05
TUBB6|MRPL4	1.45e-05
ANXA1|TMEM179B	1.44e-05
TGFBI|NFIC	1.43e-05
GNG11|NUCB2	1.43e-05
PMP22|EMP1	1.43e-05
ARPC5|IL32	1.43e-05
RPS3A|DUSP1	1.43e-05
DUSP1|MYDGF	1.42e-05
IFI27|CSRP1	1.42e-05
PSMB5|PDIA4	1.42e-05
TGFBI|MVB12A	1.42e-05
FOSB|SMIM14	1.42e-05
CD79B|ACAP1	1.41e-05
PMP22|CMTM3	1.41e-05
MYDGF|ATP6AP1	1.41e-05
AP2S1|CLTA	1.41e-05
CXCR4|IL32	1.4e-05
IFI6|PDIA4	1.39e-05
CYR61|PSMD2	1.39e-05
KDELR2|TINAGL1	1.39e-05
TINAGL1|MLF2	1.39e-05
RCN1|CLPP	1.38e-05
A2M|SSR3	1.38e-05
IER3|PSMB5	1.37e-05
IFI27|CLTA	1.37e-05
PMP22|PSMA2	1.35e-05
H2AFY|JOSD2	1.35e-05
MYDGF|ADRM1	1.35e-05
ANXA1|JUN	1.34e-05
TGFBI|PHLDA2	1.34e-05
YPEL5|MRPL57	1.34e-05
TPM1|CPE	1.33e-05
IER3|PSMD4	1.31e-05
PSMD4|PSMD2	1.3e-05
MMP14|MRPL51	1.3e-05
YPEL5|A2M	1.29e-05
CLTA|TIMP2	1.29e-05
STOM|PSMD2	1.29e-05
ANXA1|C7orf73	1.29e-05
TSC22D3|SPATS2L	1.29e-05
PSMB2|TMEM258	1.28e-05
TSC22D3|YPEL5	1.28e-05
TSC22D1|CALD1	1.28e-05
CYR61|TMEM179B	1.28e-05
CXCR4|C7orf73	1.27e-05
LMNA|SERPINH1	1.27e-05
TSC22D3|PHLDA1	1.27e-05
GLUL|TCEAL4	1.27e-05
IFI27|MRPL4	1.27e-05
DYNLRB1|MYL9	1.27e-05
TUBB6|CFH	1.27e-05
PSMB2|IER3	1.27e-05
EMP1|CRTAP	1.27e-05
CXCR4|TMEM258	1.26e-05
CD52|SLC16A3	1.25e-05
BTG1|PSMA3	1.25e-05
MRPL4|PHLDA2	1.24e-05
CAV1|IER3	1.24e-05
TPM1|PLAUR	1.22e-05
EEF1A1|EEF2	1.22e-05
PSMB2|RALY	1.21e-05
PNRC1|CYSTM1	1.21e-05
CMTM3|CTSC	1.2e-05
CXCR4|NFIC	1.2e-05
CD79A|GNG11	1.19e-05
COMT|YPEL5	1.19e-05
CAV1|C7orf73	1.19e-05
CD52|NUCB2	1.19e-05
GGCT|SSR3	1.19e-05
PHLDA2|CTHRC1	1.17e-05
CD79B|TBC1D10C	1.17e-05
LMNA|KDELR2	1.15e-05
SMIM14|TUBB6	1.15e-05
TINAGL1|ZYX	1.15e-05
SOX4|EMP1	1.15e-05
SERPINH1|MRPL51	1.15e-05
SERPINH1|GLUL	1.15e-05
IER3|BANF1	1.14e-05
PNRC1|IL32	1.12e-05
TSC22D1|C1R	1.11e-05
NDUFS6|PDIA6	1.11e-05
COMT|ZYX	1.1e-05
KLF6|PDLIM7	1.1e-05
PMP22|ID2	1.1e-05
SDF2L1|PHLDA2	1.09e-05
ABRACL|PPP1R15A	1.09e-05
CAV1|ZNHIT1	1.08e-05
GNG11|TSPAN4	1.08e-05
MYDGF|MDK	1.08e-05
ABRACL|SPARCL1	1.07e-05
SERPINH1|KLF6	1.07e-05
EEF2|HLA-C	1.07e-05
CD52|SEPT6	1.06e-05
CD69|TIMP3	1.06e-05
PNRC1|CYB5R3	1.04e-05
LMNA|CLTA	1.04e-05
TIMM13|CLTA	1.03e-05
MDK|CLTA	1.03e-05
BTG1|DUSP23	1.03e-05
CRTAP|PDLIM7	1.03e-05
JOSD2|MAP7D1	1.02e-05
CLU|MAP7D1	1.02e-05
NDUFS6|PPP1R15A	1.02e-05
IFI27|EIF6	1e-05
TIMM13|GGCT	1e-05
PHLDA1|CMTM3	9.92e-06
TMEM258|C1R	9.88e-06
TSC22D1|SPARCL1	9.86e-06
DUSP1|TIMP2	9.84e-06
ISG15|PDIA4	9.83e-06
PSMA5|A2M	9.58e-06
PSMA5|STOM	9.58e-06
DUSP23|TINAGL1	9.52e-06
PMP22|SMIM14	9.47e-06
PNRC1|SLIRP	9.46e-06
CLU|COMT	9.41e-06
MRPL51|A2M	9.38e-06
DSTN|SEC61A1	9.38e-06
TSC22D3|TUBB6	9.33e-06
BTG1|FCGRT	9.33e-06
CMTM3|MRPL4	9.32e-06
TMEM179B|CTHRC1	9.32e-06
RALY|DUSP23	9.31e-06
PNRC1|COMT	9.29e-06
PSMA2|RNASET2	9.22e-06
TSC22D1|COMT	9.2e-06
FCGRT|MRPL17	9.13e-06
CLPP|SDF2L1	9.09e-06
MAP7D1|CRTAP	8.99e-06
TMEM179B|CLPP	8.97e-06
CD79A|SEPT6	8.87e-06
PHLDA1|CLU	8.79e-06
TPM1|RNASET2	8.68e-06
RPS3A|IFI6	8.65e-06
ISG15|TINAGL1	8.64e-06
IFI27|IER3	8.6e-06
DUSP1|MLF2	8.49e-06
TGFBI|CFH	8.45e-06
TMEM179B|SSR3	8.43e-06
TIMM13|TCEAL4	8.43e-06
EEF2|PABPC1	8.39e-06
IFI27|C1R	8.29e-06
TSPAN4|CPE	8.24e-06
GSN|CYR61	8.23e-06
ACTN1|ZNHIT1	8.14e-06
PHLDA2|SSR3	8.13e-06
PLAUR|PSMA2	8.11e-06
SOX4|A2M	8.05e-06
GPR183|FUNDC2	8.05e-06
KLF6|IL32	8.03e-06
FKBP2|UBE2L6	8.02e-06
FOSB|IFI27	7.98e-06
FKBP2|STOM	7.98e-06
GPR183|RNASET2	7.94e-06
FKBP2|GGCT	7.93e-06
CD79A|CD79B	7.9e-06
MVB12A|CPE	7.8e-06
ANAPC11|CMTM3	7.71e-06
DUSP23|C1R	7.68e-06
MYL9|KDELR2	7.43e-06
PSMA5|CSRP1	7.41e-06
LMNA|TINAGL1	7.39e-06
PSMA5|FCGRT	7.25e-06
CLU|C7orf73	7.18e-06
CSRP1|CTHRC1	7.07e-06
SPATS2L|CRTAP	7.06e-06
ANAPC11|CTSC	7.02e-06
TBCB|YPEL5	7.01e-06
SEC61A1|TINAGL1	6.99e-06
TCEAL4|A2M	6.97e-06
CNIH4|PDLIM7	6.9e-06
ETHE1|CRTAP	6.9e-06
SERPINH1|DYNLRB1	6.88e-06
IFI27|RNASET2	6.84e-06
TGFBI|CRTAP	6.82e-06
PMP22|PHLDA2	6.73e-06
NFIC|IL32	6.73e-06
CYBA|TUBB6	6.62e-06
ACTN1|TIMP2	6.51e-06
PHLDA1|SPARCL1	6.47e-06
CLU|ZYX	6.42e-06
RPS3A|P4HB	6.4e-06
CD52|PDLIM7	6.35e-06
MYL9|CYSTM1	6.27e-06
IER3|TINAGL1	6.25e-06
DUSP23|KLF6	6.2e-06
CSRP1|C7orf73	6.15e-06
TMEM179B|PHLDA2	6.13e-06
TSC22D1|CYR61	6.11e-06
[truncated: 2,072 more rows]
