# Supplementary material for: Construction and experimental validation of a B cell-related gene signature to predict the prognosis and immunotherapeutic sensitivity in bladder cancer
Source: Aging (Albany NY). 2023 Jun 27;15(12):5355–80. doi: 10.18632/aging.204753 (PMC10333061; doi:10.18632/aging.204753)
Supplement: Supplementary Table 7 [file aging-15-204753-s007.xlsx]

## Sheet: Sheet1
Supplementary Table 7. The raw CT values the 19 BLCA samples and their corresponding paracarinoma tissues from local hospital.
ID	Group	CT_value
		GAPDH	ANXA1	CALD1	EMP1	ABRACL	BTG1	MDK	IL32	ARPC5	PSMD2
NHN1	Paracarinoma	16.7222	21.4397	22.7176	20.5606	23.2205	17.2281	18.3661	19.8147	19.9448	21.1907
NHN2	Paracarinoma	16.5319	23.8294	21.1029	19.4425	19.6291	21.5932	20.1846	19.9923	20.2577	19.6502
NHN3	Paracarinoma	16.0016	21.2997	21.0796	20.4045	22.9221	19.101	17.8004	17.804	20.7101	20.1364
NHN4	Paracarinoma	17.0164	23.0709	21.1918	20.5028	22.0331	22.3348	19.9532	20.065	21.3925	20.4749
NHN5	Paracarinoma	17.6578	20.5533	22.1314	20.4786	22.5882	20.682	18.1298	19.0379	22.0942	22.7723
NHN6	Paracarinoma	17.7304	22.2165	20.3594	20.6463	21.2982	22.1218	18.7782	18.3105	21.9452	19.0658
NHN7	Paracarinoma	16.4343	22.8114	20.8226	21.8192	21.9668	17.8985	18.5748	20.1681	22.1723	18.9252
NHN8	Paracarinoma	16.3073	22.1402	19.7395	22.2406	21.3388	19.6713	19.1731	19.9911	20.1558	20.479
NHN9	Paracarinoma	17.5661	22.6474	21.6347	20.718	22.5768	18.1776	20.1584	17.9684	19.4777	21.2487
NHN10	Paracarinoma	16.7124	21.4648	22.6927	21.9574	22.4435	22.9144	18.0483	19.9436	20.4773	18.966
NHN11	Paracarinoma	17.976	22.177	20.4829	19.8739	21.2678	20.3456	20.228	18.6334	21.9924	21.754
NHN12	Paracarinoma	15.9326	21.8269	21.0234	20.4668	21.9272	22.1003	17.4467	19.9465	20.6004	22.0722
NHN13	Paracarinoma	17.8078	22.3192	21.6254	20.2928	21.2037	21.807	19.0885	19.987	18.971	21.0953
NHN14	Paracarinoma	15.8237	22.3211	21.7539	21.9737	22.7141	21.2442	17.8914	20.4103	19.5799	20.3582
NHN15	Paracarinoma	17.8481	22.2708	20.5357	21.0002	20.7662	22.8901	19.3694	20.4153	20.0056	22.363
NHN16	Paracarinoma	16.7123	22.9867	20.1841	20.2272	22.7284	20.1352	18.3002	20.2246	20.9946	22.4807
NHN17	Paracarinoma	16.2223	22.2872	20.6251	21.6488	22.3547	20.591	19.2378	20.0162	21.8911	20.5776
NHN18	Paracarinoma	16.5979	21.5059	21.205	21.184	21.4672	19.9474	18.8847	18.7268	22.935	21.1168
NHN19	Paracarinoma	17.8096	21.586	19.2653	22.2951	23.0375	21.3111	19.1316	18.2335	21.4155	21.4213
NHBC1	BLCA	15.377	22.8673	22.5634	20.4576	22.6361	20.2692	18.9429	19.9464	21.3944	20.9562
NHBC2	BLCA	17.2518	22.1432	19.8821	23.0795	22.1489	20.6411	18.186	19.7733	20.6788	22.1376
NHBC3	BLCA	18.2136	21.5221	21.7724	22.1173	20.6105	21.7625	18.5862	20.9736	22.3696	21.5596
NHBC4	BLCA	18.0499	25.48	21.5694	19.7517	22.1231	23.3164	20.874	20.0506	22.7224	20.1433
NHBC5	BLCA	17.0745	26.9628	19.7783	18.9413	23.7934	19.9692	18.837	20.5013	18.0531	19.1387
NHBC6	BLCA	16.286	17.4171	17.2083	17.3602	22.3983	20.1908	19.2924	18.5675	18.3903	17.0932
NHBC7	BLCA	17.5524	18.7853	18.8256	19.4536	23.0519	21.7219	20.3193	19.3944	22.6068	19.5133
NHBC8	BLCA	17.0194	18.7476	18.3841	18.3165	22.6641	20.778	20.0037	19.6918	21.1791	18.9967
NHBC9	BLCA	17.0132	18.9421	18.4289	19.0353	22.2693	20.5427	18.4907	18.9356	22.489	18.7952
NHBC10	BLCA	16.524	17.1525	17.3173	18.2598	22.0111	21.3314	22.9927	20.0463	20.9052	17.166
NHBC11	BLCA	16.2091	18.8791	17.0562	21.5567	24.2011	18.5427	20.9701	20.0514	20.0302	18.2705
NHBC12	BLCA	14.819	16.2284	15.1051	19.3463	18.5483	17.6617	21.8811	19.3128	19.5948	15.2244
NHBC13	BLCA	18.8875	27.1095	19.4512	22.446	24.0765	22.4938	22.6834	22.6387	19.4157	19.3635
NHBC14	BLCA	17.622	27.0646	18.9996	23.6591	20.4693	20.5914	20.1922	20.8087	21.4518	19.7826
NHBC15	BLCA	15.5456	24.6439	16.9816	19.0942	21.8448	19.4534	19.5594	20.8851	20.5308	18.8781
NHBC16	BLCA	16.7121	27.9096	19.0386	20.1142	22.013	20.4361	19.992	19.9903	21.6403	19.8248
NHBC17	BLCA	17.9883	27.0937	19.2062	20.3312	23.1753	22.2021	19.5725	21.2954	18.4602	20.0468
NHBC18	BLCA	19.8909	26.2187	21.1164	20.5333	25.4562	23.7125	20.0617	22.6031	20.2969	21.7545
NHBC19	BLCA	17.1692	24.0859	18.3737	24.1374	22.1112	19.1127	21.1191	20.5019	18.3746	19.4589
