# Supplementary material for: Construction and experimental validation of a B cell-related gene signature to predict the prognosis and immunotherapeutic sensitivity in bladder cancer
Source: Aging (Albany NY). 2023 Jun 27;15(12):5355–80. doi: 10.18632/aging.204753 (PMC10333061; doi:10.18632/aging.204753)
Supplement: Supplementary Table 8 [file aging-15-204753-s008.xlsx]

## Sheet: Sheet1
Supplementary Table 8. The baseline clinical information and the mRNA expression values of the local cohort.
ID (laboratory)	Group	Age	Gender	TNM Stage	T	N	M	Grade	OS.time (day)	OS.status	mRNA expression level									BCRS	Risk
											ANXA1	CALD1	ABRACL	BTG1	MDK	IL32	PSMD2	EMP1	ARPC5
NHBC1	BLCA	57	Male	I	T1	N0	M0	High	601	0	0.151591	0.0834805	0.135451	0.243662	0.267366	0.174506	0.245221	0.377907	0.172176	1.58546	low
NHBC2	BLCA	81	Male	III	T4a	N1	M0	High	420	1	0.918372	1.96393	0.69633	0.690567	1.65706	0.721619	0.396574	0.225168	1.03693	2.36186	low
NHBC3	BLCA	82	Male	II	T2a	N0	M0	High	430	0	2.75122	1.03184	3.93963	0.618239	2.44556	0.611663	1.153	0.854444	0.625633	5.02248	high
NHBC4	BLCA	84	Male	III	T3a	N0	M0	High	472	0	0.158048	1.06029	1.23262	0.18798	0.447089	1.03536	2.74727	3.93113	0.437341	3.02192	high
NHBC5	BLCA	57	Male	II	T2b	N0	M0	High	566	0	0.0287607	1.86625	0.196965	0.972938	0.933191	0.385278	2.8034	3.50637	5.65994	1.90602	low
NHBC6	BLCA	72	Female	II	T2a	N0	M0	High	157	1	12.4454	6.41625	0.299932	0.483092	0.394033	0.852268	6.70047	6.07374	2.59392	7.01164	high
NHBC7	BLCA	45	Male	III	T4a	N0	M0	High	71	1	11.5973	5.03104	0.458652	0.402113	0.465188	1.15578	3.0116	3.42388	0.335649	7.01164	high
NHBC8	BLCA	52	Male	I	T1	N0	M0	High	115	1	8.22738	4.72201	0.41473	0.534641	0.400143	0.649959	2.97769	5.20426	0.624073	7.01164	high
NHBC9	BLCA	59	Male	IV	T4b	N1	M0	High	128	1	7.159	4.5579	0.542953	0.626643	1.13709	1.09314	3.40936	3.14871	0.250624	7.01164	high
NHBC10	BLCA	62	Male	III	T3b	N1	M0	High	210	1	17.6316	7.01638	0.462603	0.258413	0.0357491	0.360609	7.51289	3.83961	0.535196	7.01164	high
NHBC11	BLCA	64	Male	I	T1	N0	M0	High	140	1	4.28281	6.75949	0.0814954	1.43548	0.116769	0.288858	2.80893	0.314073	0.78907	4.42247	high
NHBC12	BLCA	62	Male	I	T1	N0	M0	High	141	1	10.2611	9.97184	1.5644	1.00867	0.0236941	0.183905	8.85223	0.55457	0.407137	7.01164	high
NHBC13	BLCA	65	Male	III	T3a	N0	M0	High	179	1	0.0912905	8.22688	0.568776	0.594164	0.227967	0.307711	8.42938	1.08544	7.73402	1.90602	low
NHBC14	BLCA	69	Male	II	T2a	N0	M0	High	360	1	0.0391745	4.67972	2.88319	0.923917	0.533154	0.455062	2.62229	0.194756	0.78436	1.36529	low
NHBC15	BLCA	65	Male	I	T1	N0	M0	High	476	1	0.0497309	4.4941	0.263473	0.482098	0.196019	0.102333	1.16388	1.09291	0.352146	3.02192	high
NHBC16	BLCA	67	Male	I	T1	N0	M0	High	495	1	0.0116067	2.42418	0.526343	0.547609	0.325992	0.42711	1.35547	1.20975	0.366339	3.02192	high
NHBC17	BLCA	76	Male	III	T3a	N2	M0	High	556	0	0.0494869	5.22741	0.569561	0.389958	1.05598	0.418612	2.81468	2.52082	8.04167	1.90602	low
NHBC18	BLCA	70	Male	II	T2b	N0	M0	High	559	0	0.339329	5.19999	0.438178	0.511756	2.81281	0.632263	3.22171	8.19292	8.41705	1.90602	low
NHBC19	BLCA	54	Male	IV	T4b	N1	M0	High	501	1	0.22561	5.27629	0.67497	1.88115	0.204882	0.411266	2.39775	0.102137	4.83651	2.55645	low
# The cut-off value to divide these patients into high- and low-risk subgroups was equal to 2.75, which was detected in the TCGA-BLCA cohort.
