# Supplementary material for: Construction and experimental validation of a B cell-related gene signature to predict the prognosis and immunotherapeutic sensitivity in bladder cancer
Source: Aging (Albany NY). 2023 Jun 27;15(12):5355–80. doi: 10.18632/aging.204753 (PMC10333061; doi:10.18632/aging.204753)
Supplement: Supplementary Table 11 [file aging-15-204753-s010.xlsx]

## Sheet: Sheet1
Supplementary Table 11. The BCRS of each tumor sample from TCGA.
Patient ID	Cancer _type	BCRS
TCGA-OR-A5JP-01A	ACC	1
TCGA-OR-A5JG-01A	ACC	1.34125
TCGA-OR-A5LG-01A	ACC	1.90602
TCGA-OR-A5JR-01A	ACC	1.90602
TCGA-OR-A5KU-01A	ACC	1.36529
TCGA-OR-A5LS-01A	ACC	1.90602
TCGA-OR-A5L9-01A	ACC	1.34125
TCGA-OR-A5JQ-01A	ACC	1.90602
TCGA-OR-A5K4-01A	ACC	1.90602
TCGA-OR-A5JL-01A	ACC	1.90602
TCGA-OR-A5LC-01A	ACC	1.90602
TCGA-OR-A5K2-01A	ACC	1.90602
TCGA-P6-A5OG-01A	ACC	5.22771
TCGA-OR-A5JW-01A	ACC	2.55645
TCGA-OR-A5KO-01A	ACC	1
TCGA-OR-A5J8-01A	ACC	5.02248
TCGA-PA-A5YG-01A	ACC	2.55645
TCGA-OR-A5KV-01A	ACC	1.90602
TCGA-OR-A5L4-01A	ACC	2.55645
TCGA-OR-A5KX-01A	ACC	1.90602
TCGA-OR-A5L8-01A	ACC	1.90602
TCGA-OR-A5JO-01A	ACC	2.32026
TCGA-OR-A5JA-01A	ACC	1.34125
TCGA-OR-A5LO-01A	ACC	1.90602
TCGA-OR-A5JM-01A	ACC	1
TCGA-OR-A5JV-01A	ACC	1.90602
TCGA-OR-A5JB-01A	ACC	4.42247
TCGA-OR-A5LA-01A	ACC	1
TCGA-OR-A5JE-01A	ACC	1.90602
TCGA-OR-A5JZ-01A	ACC	4.42247
TCGA-OR-A5KT-01A	ACC	1.90602
TCGA-OR-A5KZ-01A	ACC	1
TCGA-OR-A5LJ-01A	ACC	1
TCGA-OR-A5LB-01A	ACC	2.55645
TCGA-OR-A5LT-01A	ACC	3.29728
TCGA-OR-A5LD-01A	ACC	1.90602
TCGA-OR-A5J2-01A	ACC	1.90602
TCGA-PK-A5HB-01A	ACC	2.32026
TCGA-OR-A5JS-01A	ACC	1.90602
TCGA-OR-A5K6-01A	ACC	1.90602
TCGA-OR-A5JY-01A	ACC	3.29728
TCGA-OR-A5JT-01A	ACC	2.55645
TCGA-PK-A5H8-01A	ACC	2.55645
TCGA-OR-A5JX-01A	ACC	1.36529
TCGA-OR-A5LK-01A	ACC	4.42247
TCGA-P6-A5OF-01A	ACC	0.960742
TCGA-OR-A5JI-01A	ACC	3.29728
TCGA-OR-A5K5-01A	ACC	1
TCGA-OR-A5JC-01A	ACC	2.55645
TCGA-OR-A5KW-01A	ACC	1.34125
TCGA-OR-A5JJ-01A	ACC	1.36529
TCGA-OR-A5JD-01A	ACC	3.29728
TCGA-OR-A5LM-01A	ACC	1.8312
TCGA-PK-A5HA-01A	ACC	2.55645
TCGA-OR-A5JF-01A	ACC	4.42247
TCGA-OR-A5LH-01A	ACC	1.90602
TCGA-OR-A5K1-01A	ACC	1.90602
TCGA-OR-A5LN-01A	ACC	1.90602
TCGA-OR-A5LE-01A	ACC	1
TCGA-OR-A5L3-01A	ACC	1.90602
TCGA-OU-A5PI-01A	ACC	2.55645
TCGA-OR-A5K8-01A	ACC	0.716306
TCGA-OR-A5K0-01A	ACC	1.34125
TCGA-OR-A5KY-01A	ACC	2.55645
TCGA-OR-A5J9-01A	ACC	0.716306
TCGA-OR-A5J1-01A	ACC	1
TCGA-OR-A5J5-01A	ACC	1
TCGA-OR-A5L6-01A	ACC	1.90602
TCGA-OR-A5LP-01A	ACC	4.42247
TCGA-OR-A5K9-01A	ACC	1
TCGA-OR-A5J7-01A	ACC	1
TCGA-PK-A5H9-01A	ACC	1.90602
TCGA-OR-A5LR-01A	ACC	4.42247
TCGA-OR-A5JK-01A	ACC	0.716306
TCGA-OR-A5J6-01A	ACC	3.29728
TCGA-OR-A5LL-01A	ACC	1.90602
TCGA-OR-A5K3-01A	ACC	0.960742
TCGA-OR-A5J3-01A	ACC	1.34125
TCGA-OR-A5L5-01A	ACC	3.29728
TCGA-FD-A3SS-01A	BLCA	7.01164
TCGA-FD-A43S-01A	BLCA	0.716306
TCGA-UY-A78K-01A	BLCA	1.58546
TCGA-DK-A2HX-01A	BLCA	7.01164
TCGA-DK-A1A3-01A	BLCA	2.55645
TCGA-GC-A6I3-01A	BLCA	0.716306
TCGA-XF-AAMJ-01A	BLCA	5.22771
TCGA-GC-A6I1-01A	BLCA	2.32026
TCGA-ZF-A9RL-01A	BLCA	1.36529
TCGA-DK-A3IL-01A	BLCA	3.29728
TCGA-E7-A6MF-01A	BLCA	1.72993
TCGA-BT-A20R-01A	BLCA	5.02248
TCGA-H4-A2HQ-01A	BLCA	3.29728
TCGA-GV-A3QH-01A	BLCA	3.29728
TCGA-4Z-AA82-01A	BLCA	7.01164
TCGA-E7-A4XJ-01A	BLCA	3.16784
TCGA-XF-A8HE-01A	BLCA	5.22771
TCGA-XF-A9T0-01A	BLCA	1.90602
TCGA-FD-A5BT-01A	BLCA	1.72993
TCGA-FD-A3SN-01A	BLCA	3.67868
TCGA-G2-AA3C-01A	BLCA	1.72993
TCGA-HQ-A2OE-01A	BLCA	4.42247
TCGA-BL-A3JM-01A	BLCA	1.90602
TCGA-XF-AAN3-01A	BLCA	5.22771
TCGA-FD-A3SR-01A	BLCA	4.42247
TCGA-4Z-AA89-01A	BLCA	0.716306
TCGA-G2-A2EO-01A	BLCA	1.36529
TCGA-ZF-AA5H-01A	BLCA	2.74273
TCGA-BT-A20V-01A	BLCA	3.67868
TCGA-GC-A3WC-01A	BLCA	2.36186
TCGA-GV-A3JV-01A	BLCA	1.96463
TCGA-YF-AA3M-01A	BLCA	3.29728
TCGA-FD-A3B5-01A	BLCA	7.01164
TCGA-CF-A47V-01A	BLCA	1.36529
TCGA-GU-A42P-01A	BLCA	1.90602
TCGA-BT-A20T-01A	BLCA	1.36529
TCGA-XF-AAN0-01A	BLCA	7.01164
TCGA-E7-A7DV-01A	BLCA	3.29728
TCGA-GV-A40E-01A	BLCA	2.63506
TCGA-FJ-A3Z9-01A	BLCA	3.16784
TCGA-XF-A9ST-01A	BLCA	3.29728
TCGA-FJ-A3ZF-01A	BLCA	1.36529
TCGA-YC-A89H-01A	BLCA	1.23916
TCGA-CF-A9FM-01A	BLCA	1.23916
TCGA-DK-A1AD-01A	BLCA	1.36529
TCGA-G2-A2EK-01A	BLCA	1.36529
TCGA-E5-A2PC-01A	BLCA	1.72993
TCGA-C4-A0F1-01A	BLCA	2.32026
TCGA-FD-A43N-01A	BLCA	3.74463
TCGA-BL-A13J-01A	BLCA	4.42247
TCGA-FD-A3SO-01A	BLCA	4.42247
TCGA-XF-A8HD-01A	BLCA	1.72993
TCGA-BT-A20X-01A	BLCA	7.01164
TCGA-ZF-AA52-01A	BLCA	2.36186
TCGA-DK-AA76-01A	BLCA	1.36529
TCGA-GV-A3JW-01A	BLCA	1.90602
TCGA-FD-A3N6-01A	BLCA	2.32026
TCGA-CU-A5W6-01A	BLCA	1.23916
TCGA-DK-A2I4-01A	BLCA	2.74273
TCGA-DK-AA6M-01A	BLCA	1.72993
TCGA-4Z-AA7Y-01A	BLCA	1.36529
TCGA-DK-A3WY-01A	BLCA	0.716306
TCGA-E7-A3X6-01A	BLCA	1
TCGA-K4-A3WV-01A	BLCA	1
TCGA-DK-A3IQ-01A	BLCA	5.22771
TCGA-ZF-AA56-01A	BLCA	5.22771
TCGA-CU-A3QU-01A	BLCA	3.29728
TCGA-FD-A6TI-01A	BLCA	7.01164
TCGA-XF-A9T3-01A	BLCA	3.29728
TCGA-FD-A3B3-01A	BLCA	3.67868
TCGA-YF-AA3L-01A	BLCA	1
TCGA-SY-A9G0-01A	BLCA	7.01164
TCGA-ZF-A9R2-01A	BLCA	1.36529
TCGA-GU-AATQ-01A	BLCA	3.02192
TCGA-FD-A5C1-01A	BLCA	2.32026
TCGA-DK-A2I1-01A	BLCA	1.90602
TCGA-CF-A5U8-01A	BLCA	1.36529
TCGA-UY-A9PB-01A	BLCA	1.72993
TCGA-DK-A3X1-01A	BLCA	1.36529
TCGA-DK-A1AC-01A	BLCA	0.716306
TCGA-FD-A62N-01A	BLCA	1.72993
TCGA-DK-AA75-01A	BLCA	1.36529
TCGA-XF-A9SL-01A	BLCA	3.02192
TCGA-XF-A9T4-01A	BLCA	3.67868
TCGA-XF-AAN2-01A	BLCA	1.96463
TCGA-BT-A2LD-01A	BLCA	2.32026
TCGA-ZF-A9R1-01A	BLCA	1.90602
TCGA-ZF-A9R9-01A	BLCA	1.72993
TCGA-DK-A6AV-01A	BLCA	5.22771
TCGA-XF-AAMY-01A	BLCA	4.42247
TCGA-GU-A763-01A	BLCA	0.716306
TCGA-FD-A3B7-01A	BLCA	3.67868
TCGA-FD-A3NA-01A	BLCA	3.16784
TCGA-CF-A47T-01A	BLCA	3.16784
TCGA-BT-A0S7-01A	BLCA	5.22771
TCGA-GC-A3BM-01A	BLCA	3.29728
TCGA-GD-A3OP-01A	BLCA	5.22771
TCGA-SY-A9G5-01A	BLCA	1.23916
TCGA-KQ-A41S-01A	BLCA	3.74463
TCGA-4Z-AA7M-01A	BLCA	3.16784
TCGA-FD-A3SJ-01A	BLCA	1.36529
TCGA-E7-A677-01A	BLCA	1.66202
TCGA-UY-A8OD-01A	BLCA	3.29728
TCGA-DK-AA6L-01A	BLCA	1
TCGA-GD-A2C5-01A	BLCA	3.16784
TCGA-K4-A4AC-01A	BLCA	4.42247
TCGA-FD-A62O-01A	BLCA	4.42247
TCGA-BT-A2LB-01A	BLCA	4.42247
TCGA-FD-A3N5-01A	BLCA	2.32026
TCGA-G2-A3VY-01A	BLCA	3.29728
TCGA-DK-A1AA-01A	BLCA	2.36186
TCGA-XF-A9SY-01A	BLCA	4.42247
TCGA-DK-AA6Q-01A	BLCA	1.23916
TCGA-G2-A2EL-01A	BLCA	1.90602
TCGA-E7-A6ME-01A	BLCA	0.716306
TCGA-HQ-A2OF-01A	BLCA	0.716306
TCGA-FD-A6TF-01A	BLCA	7.01164
TCGA-FD-A3SP-01A	BLCA	5.22771
TCGA-BT-A20P-01A	BLCA	1.36529
TCGA-GV-A40G-01A	BLCA	1.36529
TCGA-CF-A47S-01A	BLCA	1.23916
TCGA-XF-A9T2-01A	BLCA	3.02192
TCGA-CF-A9FH-01A	BLCA	1.36529
TCGA-ZF-AA4X-01A	BLCA	1.72993
TCGA-XF-AAMQ-01A	BLCA	0.716306
TCGA-CF-A3MH-01A	BLCA	3.74463
TCGA-DK-AA6W-01A	BLCA	7.01164
TCGA-KQ-A41O-01A	BLCA	1.36529
TCGA-FJ-A3Z7-01A	BLCA	3.74463
TCGA-S5-AA26-01A	BLCA	1.36529
TCGA-FD-A3B4-01A	BLCA	4.42247
TCGA-GC-A3OO-01A	BLCA	5.22771
TCGA-XF-A9SP-01A	BLCA	4.42247
TCGA-FD-A3SL-01A	BLCA	3.29728
TCGA-FD-A6TB-01A	BLCA	3.02192
TCGA-FD-A6TA-01A	BLCA	2.36186
TCGA-XF-A8HB-01A	BLCA	1.72993
TCGA-UY-A8OB-01A	BLCA	2.32026
TCGA-GU-A767-01A	BLCA	3.02192
TCGA-FD-A43U-01A	BLCA	1.72993
TCGA-DK-AA6T-01A	BLCA	1.8312
TCGA-5N-A9KI-01A	BLCA	3.74463
TCGA-XF-A8HF-01A	BLCA	3.29728
TCGA-UY-A78L-01A	BLCA	1
TCGA-FD-A5C0-01A	BLCA	3.29728
TCGA-UY-A9PE-01A	BLCA	3.16784
TCGA-K4-A6FZ-01A	BLCA	2.63506
TCGA-DK-A3IK-01A	BLCA	3.16784
TCGA-LC-A66R-01A	BLCA	5.02248
TCGA-GU-A762-01A	BLCA	3.67868
TCGA-4Z-AA7O-01A	BLCA	3.16784
TCGA-DK-A6B5-01A	BLCA	1.58546
TCGA-C4-A0F0-01A	BLCA	4.42247
TCGA-UY-A78N-01A	BLCA	2.36186
TCGA-G2-AA3F-01A	BLCA	2.36186
TCGA-ZF-AA53-01A	BLCA	2.32026
TCGA-LT-A8JT-01A	BLCA	2.36186
TCGA-XF-A8HI-01A	BLCA	1.36529
TCGA-FJ-A3ZE-01A	BLCA	3.29728
TCGA-FD-A3SM-01A	BLCA	3.29728
TCGA-DK-AA6X-01A	BLCA	1.36529
TCGA-XF-A9SJ-01A	BLCA	1.72993
TCGA-CF-A7I0-01A	BLCA	3.16784
TCGA-GD-A3OQ-01A	BLCA	7.01164
TCGA-CU-A0YO-01A	BLCA	5.22771
TCGA-DK-AA71-01A	BLCA	1.90602
TCGA-CF-A9FL-01A	BLCA	2.36186
TCGA-ZF-AA5N-01A	BLCA	3.67868
TCGA-UY-A9PF-01A	BLCA	3.02192
TCGA-UY-A78P-01A	BLCA	1.96463
TCGA-CF-A1HR-01A	BLCA	3.29728
TCGA-DK-A3IN-01A	BLCA	3.29728
TCGA-UY-A9PH-01A	BLCA	0.716306
TCGA-GD-A76B-01A	BLCA	0.716306
TCGA-ZF-AA58-01A	BLCA	2.32026
TCGA-ZF-AA4V-01A	BLCA	1.66202
TCGA-DK-AA6R-01A	BLCA	7.01164
TCGA-FT-A61P-01A	BLCA	1.72993
TCGA-2F-A9KQ-01A	BLCA	1.90602
TCGA-K4-A54R-01A	BLCA	2.36186
TCGA-FD-A62S-01A	BLCA	7.01164
TCGA-ZF-A9R3-01A	BLCA	1.36529
TCGA-BT-A42F-01A	BLCA	2.32026
TCGA-K4-A83P-01A	BLCA	2.16462
TCGA-K4-A5RJ-01A	BLCA	1.72993
TCGA-XF-A9SX-01A	BLCA	1.72993
TCGA-KQ-A41N-01A	BLCA	1.90602
TCGA-DK-A1AE-01A	BLCA	1.36529
TCGA-DK-A3WX-01A	BLCA	7.01164
TCGA-DK-A3WW-01A	BLCA	1.66202
TCGA-XF-A9SK-01A	BLCA	1.72993
TCGA-KQ-A41R-01A	BLCA	1.36529
TCGA-CF-A3MG-01A	BLCA	3.29728
TCGA-CU-A0YR-01A	BLCA	3.29728
TCGA-UY-A78M-01A	BLCA	1.23916
TCGA-CF-A5UA-01A	BLCA	2.36186
TCGA-ZF-A9RN-01A	BLCA	1
TCGA-4Z-AA81-01A	BLCA	3.67868
TCGA-E7-A8O8-01A	BLCA	1.36529
TCGA-BL-A0C8-01B	BLCA	1.8312
TCGA-GC-A3RB-01A	BLCA	3.29728
TCGA-BT-A20O-01A	BLCA	2.32026
TCGA-G2-A2ES-01A	BLCA	3.67868
TCGA-DK-AA6P-01A	BLCA	1.36529
TCGA-FD-A43P-01A	BLCA	1.66202
TCGA-2F-A9KT-01A	BLCA	4.42247
TCGA-CF-A9FF-01A	BLCA	1.36529
TCGA-UY-A9PA-01A	BLCA	1.96463
TCGA-E7-A7DU-01A	BLCA	1.36529
TCGA-2F-A9KW-01A	BLCA	3.16784
TCGA-4Z-AA87-01A	BLCA	1.23916
TCGA-GU-A42Q-01A	BLCA	3.29728
TCGA-E7-A97P-01A	BLCA	2.63506
TCGA-XF-AAMG-01A	BLCA	1.36529
TCGA-BT-A3PH-01A	BLCA	4.42247
TCGA-ZF-AA4R-01A	BLCA	2.36186
TCGA-ZF-AA5P-01A	BLCA	3.02192
TCGA-DK-A3X2-01A	BLCA	5.22771
TCGA-YC-A8S6-01A	BLCA	3.74463
TCGA-K4-A4AB-01B	BLCA	5.22771
TCGA-GC-A3RC-01A	BLCA	3.29728
TCGA-BL-A0C8-01A	BLCA	1.36529
TCGA-GU-AATP-01A	BLCA	2.36186
TCGA-CF-A1HS-01A	BLCA	4.42247
TCGA-ZF-AA4U-01A	BLCA	2.36186
TCGA-GV-A3QF-01A	BLCA	1.90602
TCGA-GC-A4ZW-01A	BLCA	1
TCGA-ZF-A9RD-01A	BLCA	4.42247
TCGA-GU-A766-01A	BLCA	1.66202
TCGA-G2-A2EF-01A	BLCA	2.32026
TCGA-FD-A5BY-01A	BLCA	3.29728
TCGA-CF-A8HX-01A	BLCA	2.36186
TCGA-GV-A6ZA-01A	BLCA	1.23916
TCGA-DK-A1A5-01A	BLCA	2.36186
TCGA-4Z-AA7N-01A	BLCA	2.16462
TCGA-GC-A3RD-01A	BLCA	5.22771
TCGA-G2-A3IE-01A	BLCA	1.23916
TCGA-FD-A5BZ-01A	BLCA	7.01164
TCGA-BT-A3PJ-01A	BLCA	7.01164
TCGA-CU-A72E-01A	BLCA	5.02248
TCGA-ZF-A9RM-01A	BLCA	1.90602
TCGA-FD-A6TH-01A	BLCA	5.22771
TCGA-GD-A3OS-01A	BLCA	1.72993
TCGA-DK-A3IS-01A	BLCA	1.36529
TCGA-K4-A3WS-01A	BLCA	2.36186
TCGA-4Z-AA7R-01A	BLCA	2.36186
TCGA-DK-A6B1-01A	BLCA	1.36529
TCGA-GV-A3QI-01A	BLCA	1.90602
TCGA-DK-A6AW-01A	BLCA	2.16462
TCGA-BT-A20W-01A	BLCA	2.36186
TCGA-DK-A3IU-01A	BLCA	1.66202
TCGA-GC-A3YS-01A	BLCA	2.36186
TCGA-4Z-AA7Q-01A	BLCA	2.32026
TCGA-LT-A5Z6-01A	BLCA	1.90602
TCGA-GC-A3I6-01A	BLCA	2.74273
TCGA-E7-A5KF-01A	BLCA	0.716306
TCGA-DK-A3IM-01A	BLCA	7.01164
TCGA-CF-A47X-01A	BLCA	1.36529
TCGA-BT-A2LA-01A	BLCA	1.90602
TCGA-GV-A3QK-01B	BLCA	0.716306
TCGA-FD-A6TD-01A	BLCA	1.23916
TCGA-XF-AAMX-01A	BLCA	3.29728
TCGA-ZF-A9R5-01A	BLCA	0.716306
TCGA-XF-A8HC-01A	BLCA	5.22771
TCGA-ZF-A9RF-01A	BLCA	2.32026
TCGA-H4-A2HO-01A	BLCA	1.36529
TCGA-BT-A42E-01A	BLCA	2.32026
TCGA-FD-A5BU-01A	BLCA	4.42247
TCGA-XF-A9T6-01A	BLCA	2.32026
TCGA-ZF-AA4T-01A	BLCA	2.36186
TCGA-FD-A3B6-01A	BLCA	3.67868
TCGA-4Z-AA80-01A	BLCA	1.36529
TCGA-XF-A9SW-01A	BLCA	7.01164
TCGA-E7-A5KE-01A	BLCA	1.90602
TCGA-DK-AA6S-01A	BLCA	1.36529
TCGA-FD-A5BR-01A	BLCA	7.01164
TCGA-FD-A6TC-01A	BLCA	3.29728
TCGA-XF-AAN1-01A	BLCA	1.36529
TCGA-DK-A3IV-01A	BLCA	1
TCGA-PQ-A6FN-01A	BLCA	2.32026
TCGA-K4-A5RI-01A	BLCA	5.22771
TCGA-ZF-A9R7-01A	BLCA	0.716306
TCGA-XF-A9SM-01A	BLCA	1.72993
TCGA-FD-A6TE-01A	BLCA	1.72993
TCGA-XF-AAME-01A	BLCA	7.01164
TCGA-BT-A42C-01A	BLCA	1.36529
TCGA-CF-A47Y-01A	BLCA	2.36186
TCGA-E7-A519-01A	BLCA	0.716306
TCGA-FD-A43Y-01A	BLCA	3.29728
TCGA-BL-A5ZZ-01A	BLCA	7.01164
TCGA-CF-A3MF-01A	BLCA	1
TCGA-FD-A3B8-01A	BLCA	5.22771
TCGA-BL-A13I-01B	BLCA	7.01164
TCGA-DK-A1A7-01A	BLCA	2.36186
TCGA-DK-A1A6-01A	BLCA	3.29728
TCGA-DK-A6B2-01A	BLCA	5.22771
TCGA-DK-AA74-01A	BLCA	1.72993
TCGA-ZF-AA4N-01A	BLCA	4.42247
TCGA-BT-A0YX-01A	BLCA	7.01164
TCGA-R3-A69X-01A	BLCA	3.29728
TCGA-XF-AAMW-01A	BLCA	4.42247
TCGA-C4-A0EZ-01A	BLCA	1.90602
TCGA-E7-A678-01A	BLCA	0.716306
TCGA-G2-A3IB-01A	BLCA	7.01164
TCGA-BL-A13J-01B	BLCA	7.01164
TCGA-DK-A3IT-01A	BLCA	4.42247
TCGA-MV-A51V-01A	BLCA	3.29728
TCGA-UY-A78O-01A	BLCA	1.23916
TCGA-FD-A6TK-01A	BLCA	2.32026
TCGA-4Z-AA83-01A	BLCA	0.716306
TCGA-DK-A2I6-01A	BLCA	4.42247
TCGA-XF-AAN4-01A	BLCA	7.01164
TCGA-CF-A27C-01A	BLCA	3.16784
TCGA-5N-A9KM-01A	BLCA	3.16784
TCGA-BT-A20U-01A	BLCA	5.22771
TCGA-YC-A9TC-01A	BLCA	1.90602
TCGA-E7-A6MD-01A	BLCA	2.36186
TCGA-K4-A5RH-01A	BLCA	1.72993
TCGA-XF-AAMH-01A	BLCA	5.22771
TCGA-DK-A1AB-01A	BLCA	7.01164
TCGA-E5-A4TZ-01A	BLCA	5.22771
TCGA-FD-A43X-01A	BLCA	1.36529
TCGA-XF-A9SU-01A	BLCA	3.29728
TCGA-BT-A20N-01A	BLCA	3.29728
TCGA-BT-A20J-01A	BLCA	1
TCGA-E7-A4IJ-01A	BLCA	0.716306
TCGA-CF-A47W-01A	BLCA	1.36529
TCGA-XF-A9SV-01A	BLCA	2.36186
TCGA-K4-AAQO-01A	BLCA	3.29728
TCGA-CU-A3YL-01A	BLCA	1.36529
TCGA-DK-A2I2-01A	BLCA	2.32026
TCGA-4Z-AA84-01A	BLCA	1.66202
TCGA-DK-A1AF-01A	BLCA	5.22771
TCGA-E5-A4U1-01A	BLCA	1.36529
TCGA-BT-A20Q-01A	BLCA	1.36529
TCGA-ZF-A9R4-01A	BLCA	1.23916
TCGA-KQ-A41Q-01A	BLCA	1.36529
TCGA-E7-A8O7-01A	BLCA	1.23916
TCGA-ZF-AA4W-01A	BLCA	4.42247
TCGA-XF-AAN7-01A	BLCA	3.02192
TCGA-XF-A8HH-01A	BLCA	7.01164
TCGA-FD-A5BX-01A	BLCA	5.22771
TCGA-ZF-A9RE-01A	BLCA	7.01164
TCGA-FT-A3EE-01A	BLCA	7.01164
TCGA-XF-A9T5-01A	BLCA	1
TCGA-XF-AAML-01A	BLCA	1.23916
TCGA-BT-A3PK-01A	BLCA	7.01164
TCGA-CF-A3MI-01A	BLCA	1.23916
TCGA-E7-A541-01A	BLCA	1.23916
TCGA-ZF-AA54-01A	BLCA	7.01164
TCGA-XF-AAMZ-01A	BLCA	1.90602
TCGA-CF-A8HY-01A	BLCA	0.716306
TCGA-GV-A3QG-01A	BLCA	1.66202
TCGA-DK-A6B6-01A	BLCA	0.716306
TCGA-DK-A6B0-01A	BLCA	1.36529
TCGA-E7-A97Q-01A	BLCA	1.72993
TCGA-2F-A9KP-01A	BLCA	5.22771
TCGA-FD-A62P-01A	BLCA	7.01164
TCGA-XF-A8HG-01A	BLCA	1.36529
TCGA-4Z-AA86-01A	BLCA	2.32026
TCGA-GD-A6C6-01A	BLCA	0.716306
TCGA-G2-A2EJ-01A	BLCA	3.67868
TCGA-UY-A9PD-01A	BLCA	1.90602
TCGA-S5-A6DX-01A	BLCA	1.72993
TCGA-FD-A3SQ-01A	BLCA	1.90602
TCGA-DK-AA77-01A	BLCA	0.716306
TCGA-BL-A13I-01A	BLCA	4.42247
TCGA-K4-A6MB-01A	BLCA	2.36186
TCGA-ZF-AA51-01A	BLCA	0.960742
TCGA-E7-A7PW-01A	BLCA	1.23916
TCGA-E7-A85H-01A	BLCA	1.23916
TCGA-XF-AAMR-01A	BLCA	1.90602
TCGA-FD-A6TG-01A	BLCA	3.29728
TCGA-2F-A9KO-01A	BLCA	1.36529
TCGA-HQ-A5ND-01A	BLCA	7.01164
TCGA-G2-AA3B-01A	BLCA	1.23916
TCGA-PQ-A6FI-01A	BLCA	2.32026
TCGA-C4-A0F7-01A	BLCA	3.02192
TCGA-FD-A5BS-01A	BLCA	0.716306
TCGA-GV-A3JX-01A	BLCA	1
TCGA-XF-AAMT-01A	BLCA	3.29728
TCGA-XF-A9T8-01A	BLCA	7.01164
TCGA-4Z-AA7S-01A	BLCA	3.16784
TCGA-XF-A9SH-01A	BLCA	1.66202
TCGA-DK-A1AG-01A	BLCA	1.36529
TCGA-2F-A9KR-01A	BLCA	1.90602
TCGA-DK-AA6U-01A	BLCA	2.36186
TCGA-C4-A0F6-01A	BLCA	2.36186
TCGA-K4-A3WU-01B	BLCA	4.42247
TCGA-CU-A0YN-01A	BLCA	7.01164
TCGA-FJ-A871-01A	BLCA	7.01164
TCGA-G2-A2EC-01A	BLCA	3.16784
TCGA-FD-A5BV-01A	BLCA	2.36186
TCGA-E7-A7XN-01A	BLCA	1.23916
TCGA-GU-A764-01A	BLCA	1.96463
TCGA-XF-AAN8-01A	BLCA	7.01164
TCGA-XF-A9SZ-01A	BLCA	3.16784
TCGA-GU-AATO-01A	BLCA	1.23916
TCGA-ZF-A9RC-01A	BLCA	2.36186
TCGA-ZF-A9R0-01A	BLCA	4.42247
TCGA-KQ-A41P-01A	BLCA	2.16462
TCGA-4Z-AA7W-01A	BLCA	1.72993
TCGA-HQ-A5NE-01A	BLCA	7.01164
TCGA-CU-A3KJ-01A	BLCA	2.74273
TCGA-UY-A8OC-01A	BLCA	5.02248
TCGA-E7-A3Y1-01A	BLCA	1.36529
TCGA-XF-AAN5-01A	BLCA	3.67868
TCGA-G2-AA3D-01A	BLCA	1.72993
TCGA-GU-A42R-01A	BLCA	1.36529
TCGA-XF-A9SI-01A	BLCA	0.716306
TCGA-GV-A3JZ-01A	BLCA	3.29728
TCGA-E9-A1NI-01A	BRCA	3.02192
TCGA-A1-A0SP-01A	BRCA	5.02248
TCGA-A8-A06X-01A	BRCA	1.36529
TCGA-E2-A14T-01A	BRCA	3.29728
TCGA-AC-A8OS-01A	BRCA	5.22771
TCGA-A8-A09K-01A	BRCA	1
TCGA-OL-A5RY-01A	BRCA	3.16784
TCGA-BH-A0DG-01A	BRCA	5.22771
TCGA-B6-A0I9-01A	BRCA	1.90602
TCGA-A2-A0CP-01A	BRCA	3.02192
TCGA-A8-A07S-01A	BRCA	1.90602
TCGA-AO-A12H-01A	BRCA	1.90602
TCGA-AR-A1AU-01A	BRCA	5.22771
TCGA-D8-A1X9-01A	BRCA	5.22771
TCGA-A8-A07R-01A	BRCA	1
TCGA-AO-A12C-01A	BRCA	5.22771
TCGA-V7-A7HQ-01A	BRCA	1.90602
TCGA-A2-A1FZ-01A	BRCA	3.02192
TCGA-AR-A251-01A	BRCA	7.01164
TCGA-EW-A1PF-01A	BRCA	5.22771
TCGA-BH-A18T-01A	BRCA	1.23916
TCGA-AR-A24S-01A	BRCA	5.02248
TCGA-AN-A041-01A	BRCA	1.90602
TCGA-E2-A1LL-01A	BRCA	4.42247
TCGA-E2-A1IJ-01A	BRCA	5.22771
TCGA-AR-A24O-01A	BRCA	7.01164
TCGA-XX-A899-01A	BRCA	3.02192
TCGA-D8-A1XK-01A	BRCA	1.90602
TCGA-AC-A5XS-01A	BRCA	0.716306
TCGA-BH-A18L-01A	BRCA	1.90602
TCGA-OL-A66J-01A	BRCA	3.02192
TCGA-PE-A5DD-01A	BRCA	3.02192
TCGA-AN-A04D-01A	BRCA	1.36529
TCGA-4H-AAAK-01A	BRCA	5.22771
TCGA-E9-A5FL-01A	BRCA	3.29728
TCGA-E9-A24A-01A	BRCA	4.05314
TCGA-BH-A1FM-01A	BRCA	2.55645
TCGA-A8-A07C-01A	BRCA	1.36529
TCGA-AR-A24Q-01A	BRCA	4.42247
TCGA-AR-A2LE-01A	BRCA	1.36529
TCGA-AR-A0U4-01A	BRCA	2.32026
TCGA-GM-A2DN-01A	BRCA	1.36529
TCGA-A7-A13D-01A	BRCA	7.01164
TCGA-D8-A1JG-01B	BRCA	1.36529
TCGA-E2-A570-01A	BRCA	2.36186
TCGA-A2-A04Q-01A	BRCA	0.716306
TCGA-A7-A6VV-01A	BRCA	2.90328
TCGA-E2-A1IG-01A	BRCA	5.22771
TCGA-E9-A1N6-01A	BRCA	3.74463
TCGA-E9-A1NC-01A	BRCA	5.02248
TCGA-A7-A3IZ-01A	BRCA	3.02192
TCGA-AN-A0AK-01A	BRCA	1.90602
TCGA-D8-A1JM-01A	BRCA	1.90602
TCGA-OL-A5S0-01A	BRCA	1.72993
TCGA-A8-A06Z-01A	BRCA	1.90602
TCGA-AQ-A54O-01A	BRCA	0.716306
TCGA-E2-A15S-01A	BRCA	1.90602
TCGA-EW-A423-01A	BRCA	0.716306
TCGA-C8-A273-01A	BRCA	1.90602
TCGA-OL-A5RV-01A	BRCA	2.16462
TCGA-AC-A2FM-01A	BRCA	1.90602
TCGA-AO-A0JM-01A	BRCA	7.01164
TCGA-BH-A0DP-01A	BRCA	4.05314
TCGA-A2-A25E-01A	BRCA	1.90602
TCGA-B6-A2IU-01A	BRCA	3.02192
TCGA-BH-A18P-01A	BRCA	1.90602
TCGA-E9-A22B-01A	BRCA	5.22771
TCGA-A2-A0SW-01A	BRCA	1.90602
TCGA-E2-A107-01A	BRCA	1.90602
TCGA-E2-A1B6-01A	BRCA	0.716306
TCGA-D8-A1XW-01A	BRCA	4.05314
TCGA-A7-A0DC-01A	BRCA	1.58546
TCGA-EW-A6SD-01A	BRCA	3.02192
TCGA-AO-A0J3-01A	BRCA	3.02192
TCGA-AN-A03X-01A	BRCA	3.02192
TCGA-A8-A099-01A	BRCA	3.02192
TCGA-E2-A14Z-01A	BRCA	2.16462
TCGA-AR-A5QP-01A	BRCA	5.22771
TCGA-AC-A62X-01A	BRCA	2.36186
TCGA-BH-A42V-01A	BRCA	4.05314
TCGA-B6-A0RS-01A	BRCA	2.16462
TCGA-D8-A1JL-01A	BRCA	7.01164
TCGA-BH-A0DZ-01A	BRCA	1.90602
TCGA-A8-A06Y-01A	BRCA	1.90602
TCGA-B6-A1KC-01B	BRCA	3.02192
TCGA-C8-A135-01A	BRCA	5.02248
TCGA-5L-AAT1-01A	BRCA	1.90602
TCGA-AR-A24R-01A	BRCA	1.90602
TCGA-S3-AA0Z-01A	BRCA	1
TCGA-D8-A1J8-01A	BRCA	3.16784
TCGA-A2-A0ER-01A	BRCA	3.02192
TCGA-E9-A1ND-01A	BRCA	5.22771
TCGA-A2-A1G1-01A	BRCA	3.16784
TCGA-A2-A0SU-01A	BRCA	4.05314
TCGA-E2-A1LB-01A	BRCA	3.02192
TCGA-E9-A1RD-01A	BRCA	3.02192
TCGA-OL-A6VQ-01A	BRCA	3.02192
TCGA-AQ-A04J-01A	BRCA	2.16462
TCGA-AQ-A1H3-01A	BRCA	3.02192
TCGA-A2-A259-01A	BRCA	7.01164
TCGA-WT-AB44-01A	BRCA	1.13567
TCGA-B6-A0IN-01A	BRCA	1.90602
TCGA-E9-A1R3-01A	BRCA	4.42247
TCGA-A8-A086-01A	BRCA	5.22771
TCGA-AC-A3BB-01A	BRCA	5.22771
TCGA-AC-A2QI-01A	BRCA	1.90602
TCGA-BH-A1F5-01A	BRCA	3.02192
TCGA-AC-A3HN-01A	BRCA	5.22771
TCGA-BH-A1FG-01A	BRCA	3.02192
TCGA-BH-A0DV-01A	BRCA	7.01164
TCGA-UL-AAZ6-01A	BRCA	1.72993
TCGA-AR-A255-01A	BRCA	3.02192
TCGA-LD-A7W6-01A	BRCA	3.02192
TCGA-AR-A24Z-01A	BRCA	2.16462
TCGA-A1-A0SO-01A	BRCA	3.29728
TCGA-A2-A3XS-01A	BRCA	3.74463
TCGA-D8-A1X6-01A	BRCA	4.05314
TCGA-BH-A0HF-01A	BRCA	5.22771
TCGA-A7-A3J0-01A	BRCA	1
TCGA-AC-A23C-01A	BRCA	3.29728
TCGA-LL-A442-01A	BRCA	1.90602
TCGA-S3-A6ZH-01A	BRCA	3.02192
TCGA-AC-A8OR-01A	BRCA	7.01164
TCGA-AR-A1AX-01A	BRCA	3.02192
TCGA-D8-A1XO-01A	BRCA	5.22771
TCGA-E9-A1R2-01A	BRCA	3.02192
TCGA-D8-A27M-01A	BRCA	7.01164
TCGA-AN-A0FY-01A	BRCA	1.90602
TCGA-BH-A0DX-01A	BRCA	2.16462
TCGA-EW-A1IY-01A	BRCA	1.8312
TCGA-A2-A04N-01A	BRCA	3.02192
TCGA-A2-A0YF-01A	BRCA	1.90602
TCGA-PE-A5DE-01A	BRCA	1
TCGA-EW-A1J5-01A	BRCA	1.90602
TCGA-AO-A0JE-01A	BRCA	3.02192
TCGA-BH-A1FN-01A	BRCA	1.90602
TCGA-BH-A18V-01A	BRCA	3.02192
TCGA-BH-A0BF-01A	BRCA	3.02192
TCGA-B6-A409-01A	BRCA	1.96463
TCGA-A2-A0CL-01A	BRCA	3.02192
TCGA-A2-A0CO-01A	BRCA	3.02192
TCGA-AC-A3QP-01A	BRCA	5.22771
TCGA-AC-A2QJ-01A	BRCA	1.72993
TCGA-B6-A0RM-01A	BRCA	3.02192
TCGA-D8-A1JS-01A	BRCA	2.16462
TCGA-A7-A26J-01A	BRCA	3.29728
TCGA-A7-A13H-01A	BRCA	3.02192
TCGA-AO-A126-01A	BRCA	5.22771
TCGA-BH-A6R8-01A	BRCA	1.90602
TCGA-A7-A0DB-01C	BRCA	4.05314
TCGA-AC-A3TM-01A	BRCA	1
TCGA-AR-A0TQ-01A	BRCA	1.90602
TCGA-GM-A2DH-01A	BRCA	1.90602
TCGA-B6-A0RI-01A	BRCA	5.22771
TCGA-A2-A1G0-01A	BRCA	5.22771
TCGA-A2-A1FX-01A	BRCA	3.02192
TCGA-A7-A26G-01A	BRCA	2.55645
TCGA-E2-A1LI-01A	BRCA	1.23916
TCGA-A8-A08P-01A	BRCA	1.90602
TCGA-E2-A1IN-01A	BRCA	7.01164
TCGA-BH-A0HA-01A	BRCA	5.22771
TCGA-AO-A1KR-01A	BRCA	1.36529
TCGA-3C-AALK-01A	BRCA	2.36186
TCGA-BH-A0BV-01A	BRCA	1.90602
TCGA-E2-A1IH-01A	BRCA	2.16462
TCGA-XX-A89A-01A	BRCA	3.02192
TCGA-E9-A1RH-01A	BRCA	2.55645
TCGA-A8-A085-01A	BRCA	3.02192
TCGA-E9-A1N3-01A	BRCA	1.90602
TCGA-D8-A13Y-01A	BRCA	1.90602
TCGA-AO-A0JB-01A	BRCA	3.29728
TCGA-AC-A6IV-01A	BRCA	5.22771
TCGA-A8-A09M-01A	BRCA	1.90602
TCGA-BH-A0GY-01A	BRCA	2.16462
TCGA-AR-A2LL-01A	BRCA	1.90602
TCGA-BH-A208-01A	BRCA	5.02248
TCGA-EW-A1PE-01A	BRCA	3.02192
TCGA-AO-A125-01A	BRCA	1.36529
TCGA-E2-A1B1-01A	BRCA	7.01164
TCGA-BH-A0C0-01A	BRCA	1
TCGA-A7-A26I-01B	BRCA	7.01164
TCGA-AO-A0JJ-01A	BRCA	3.02192
TCGA-AR-A2LH-01A	BRCA	3.74463
TCGA-A2-A3XW-01A	BRCA	1.58546
TCGA-AR-A0TS-01A	BRCA	7.01164
TCGA-BH-A0AV-01A	BRCA	5.02248
TCGA-A8-A07B-01A	BRCA	5.02248
TCGA-LL-A73Z-01A	BRCA	3.74463
TCGA-B6-A402-01A	BRCA	5.02248
TCGA-AR-A0TT-01A	BRCA	2.55645
TCGA-EW-A6SB-01A	BRCA	0.716306
TCGA-AC-A2FB-01A	BRCA	3.02192
TCGA-AC-A62V-01A	BRCA	3.29728
TCGA-D8-A1XQ-01A	BRCA	1
TCGA-BH-A0DD-01A	BRCA	3.02192
TCGA-Z7-A8R6-01A	BRCA	1.90602
TCGA-OL-A5DA-01A	BRCA	3.02192
TCGA-WT-AB41-01A	BRCA	1
TCGA-E2-A1LA-01A	BRCA	0.716306
TCGA-AR-A24N-01A	BRCA	1.90602
TCGA-E9-A3QA-01A	BRCA	1.72993
TCGA-E2-A15J-01A	BRCA	1.90602
TCGA-LL-A73Y-01A	BRCA	7.01164
TCGA-A2-A4RY-01A	BRCA	3.02192
TCGA-D8-A1XU-01A	BRCA	1.36529
TCGA-AN-A0FJ-01A	BRCA	1.90602
TCGA-BH-A0DK-01A	BRCA	3.02192
TCGA-B6-A0IJ-01A	BRCA	1
TCGA-LL-A7SZ-01A	BRCA	1
TCGA-C8-A26Y-01A	BRCA	2.55645
TCGA-A8-A06R-01A	BRCA	3.29728
TCGA-AO-A128-01A	BRCA	1
TCGA-E2-A1BC-01A	BRCA	4.05314
TCGA-B6-A0I6-01A	BRCA	7.01164
TCGA-BH-A1ET-01A	BRCA	3.02192
TCGA-A2-A04V-01A	BRCA	1.34125
TCGA-A7-A2KD-01A	BRCA	1.36529
TCGA-A7-A0CE-01A	BRCA	1.90602
TCGA-D8-A1JE-01A	BRCA	7.01164
TCGA-B6-A0WX-01A	BRCA	2.36186
TCGA-A7-A4SB-01A	BRCA	3.02192
TCGA-EW-A1J1-01A	BRCA	1.90602
TCGA-A2-A0YM-01A	BRCA	3.67868
TCGA-A8-A0A4-01A	BRCA	5.22771
TCGA-A2-A0EM-01A	BRCA	3.02192
TCGA-AR-A24X-01A	BRCA	2.90328
TCGA-C8-A132-01A	BRCA	5.22771
TCGA-AN-A049-01A	BRCA	1.90602
TCGA-A2-A0SY-01A	BRCA	4.05314
TCGA-B6-A0RU-01A	BRCA	3.02192
TCGA-AR-A0TX-01A	BRCA	1.90602
TCGA-BH-A0HQ-01A	BRCA	3.02192
TCGA-E2-A15C-01A	BRCA	3.02192
TCGA-AQ-A54N-01A	BRCA	1.36529
TCGA-A8-A07I-01A	BRCA	5.22771
TCGA-B6-A1KI-01A	BRCA	3.02192
TCGA-B6-A0RH-01A	BRCA	1.90602
TCGA-BH-A5IZ-01A	BRCA	1.72993
TCGA-AN-A0XU-01A	BRCA	1.36529
TCGA-LD-A74U-01A	BRCA	5.22771
TCGA-B6-A401-01A	BRCA	2.16462
TCGA-PL-A8LV-01A	BRCA	5.02248
TCGA-BH-A0BR-01A	BRCA	5.22771
TCGA-A8-A07G-01A	BRCA	1.90602
TCGA-A2-A0EN-01A	BRCA	7.01164
TCGA-OK-A5Q2-01A	BRCA	3.02192
TCGA-A8-A084-01A	BRCA	1.90602
TCGA-BH-A0DS-01A	BRCA	3.02192
TCGA-A8-A09I-01A	BRCA	1.90602
TCGA-GM-A3XL-01A	BRCA	1.72993
TCGA-W8-A86G-01A	BRCA	3.74463
TCGA-AO-A12F-01A	BRCA	2.36186
TCGA-BH-A0HK-01A	BRCA	4.05314
TCGA-A8-A06Q-01A	BRCA	1.90602
TCGA-BH-A42U-01A	BRCA	5.22771
TCGA-AQ-A04L-01B	BRCA	2.90328
TCGA-AR-A1AO-01A	BRCA	5.22771
TCGA-Z7-A8R5-01A	BRCA	3.74463
TCGA-B6-A0I1-01A	BRCA	2.16462
TCGA-EW-A1PA-01A	BRCA	3.02192
TCGA-BH-A0W4-01A	BRCA	3.02192
TCGA-A2-A3XZ-01A	BRCA	0.716306
TCGA-A7-A26H-01A	BRCA	3.02192
TCGA-E2-A1B0-01A	BRCA	3.02192
TCGA-BH-A1EU-01A	BRCA	7.01164
TCGA-AC-A23H-01A	BRCA	1.90602
TCGA-EW-A1P4-01A	BRCA	2.32026
TCGA-E2-A10E-01A	BRCA	1.90602
TCGA-EW-A1P0-01A	BRCA	2.55645
TCGA-EW-A6S9-01A	BRCA	5.22771
TCGA-A2-A25B-01A	BRCA	1.90602
TCGA-LL-A6FR-01A	BRCA	1.36529
TCGA-AR-A5QM-01A	BRCA	5.22771
TCGA-EW-A1P5-01A	BRCA	3.29728
TCGA-E2-A14O-01A	BRCA	1
TCGA-AN-A0AR-01A	BRCA	3.74463
TCGA-E9-A22D-01A	BRCA	1
TCGA-A2-A0CS-01A	BRCA	1
TCGA-E2-A1IF-01A	BRCA	1.36529
TCGA-E2-A1IE-01A	BRCA	3.02192
TCGA-BH-A0BW-01A	BRCA	2.32026
TCGA-E2-A1AZ-01A	BRCA	3.74463
TCGA-D8-A27N-01A	BRCA	5.22771
TCGA-A2-A0CT-01A	BRCA	3.02192
TCGA-A8-A09R-01A	BRCA	3.29728
TCGA-B6-A0RE-01A	BRCA	3.16784
TCGA-E9-A249-01A	BRCA	2.55645
TCGA-E2-A1B5-01A	BRCA	0.960742
TCGA-A2-A25A-01A	BRCA	7.01164
TCGA-AO-A03O-01A	BRCA	1.90602
TCGA-E9-A22A-01A	BRCA	4.42247
TCGA-BH-A0GZ-01A	BRCA	2.36186
TCGA-BH-A1FD-01A	BRCA	7.01164
TCGA-A1-A0SH-01A	BRCA	5.22771
TCGA-E2-A10A-01A	BRCA	1.90602
TCGA-B6-A0IO-01A	BRCA	0.716306
TCGA-BH-A1FR-01A	BRCA	1.90602
TCGA-D8-A143-01A	BRCA	1.90602
TCGA-AO-A03R-01A	BRCA	1.58546
TCGA-BH-A0E0-01A	BRCA	1.90602
TCGA-A8-A0AD-01A	BRCA	3.02192
TCGA-GM-A2DI-01A	BRCA	3.02192
TCGA-E9-A6HE-01A	BRCA	1.13567
TCGA-BH-A0B3-01A	BRCA	1.72993
TCGA-AR-A0TU-01A	BRCA	1.23916
TCGA-LQ-A4E4-01A	BRCA	2.55645
TCGA-PL-A8LY-01A	BRCA	3.29728
TCGA-BH-A1FU-01A	BRCA	3.02192
TCGA-A8-A09D-01A	BRCA	3.02192
TCGA-B6-A3ZX-01A	BRCA	1.58546
TCGA-A7-A5ZV-01A	BRCA	4.05314
TCGA-BH-A0AY-01A	BRCA	3.74463
TCGA-A7-A4SD-01A	BRCA	5.22771
TCGA-AO-A03L-01A	BRCA	1.90602
TCGA-A2-A0EX-01A	BRCA	3.02192
TCGA-GM-A2DM-01A	BRCA	2.55645
TCGA-BH-A0DO-01B	BRCA	3.02192
TCGA-HN-A2OB-01A	BRCA	3.02192
TCGA-A2-A0CM-01A	BRCA	2.63506
TCGA-A2-A4S0-01A	BRCA	1.90602
TCGA-BH-A0H9-01A	BRCA	1.36529
TCGA-B6-A0IP-01A	BRCA	1.90602
TCGA-C8-A12X-01A	BRCA	1.90602
TCGA-AN-A0AL-01A	BRCA	1.90602
TCGA-LD-A9QF-01A	BRCA	5.22771
TCGA-E2-A152-01A	BRCA	3.74463
TCGA-BH-A1FE-06A	BRCA	5.22771
TCGA-BH-A18N-01A	BRCA	3.02192
TCGA-C8-A1HN-01A	BRCA	1.90602
TCGA-AN-A0FK-01A	BRCA	1.36529
TCGA-B6-A0IE-01A	BRCA	1.36529
TCGA-B6-A400-01A	BRCA	3.02192
TCGA-GM-A2DB-01A	BRCA	0.960742
TCGA-AC-A2FK-01A	BRCA	7.01164
TCGA-BH-A0HU-01A	BRCA	1.90602
TCGA-D8-A140-01A	BRCA	1.90602
TCGA-A7-A0CD-01A	BRCA	3.02192
TCGA-D8-A1JF-01A	BRCA	3.74463
TCGA-A2-A4S1-01A	BRCA	7.01164
TCGA-5T-A9QA-01A	BRCA	1.90602
TCGA-AR-A2LK-01A	BRCA	1.90602
TCGA-AR-A1AH-01A	BRCA	1.36529
TCGA-AR-A254-01A	BRCA	3.02192
TCGA-E2-A1IO-01A	BRCA	5.22771
TCGA-S3-A6ZF-01A	BRCA	3.29728
TCGA-B6-A0IB-01A	BRCA	0.716306
TCGA-A8-A07J-01A	BRCA	7.01164
TCGA-AN-A0FV-01A	BRCA	3.29728
TCGA-AN-A0XP-01A	BRCA	1.90602
TCGA-A8-A08Z-01A	BRCA	4.42247
TCGA-E9-A226-01A	BRCA	1.90602
TCGA-AR-A1AW-01A	BRCA	1
TCGA-GI-A2C9-01A	BRCA	5.02248
TCGA-EW-A6SA-01A	BRCA	1
TCGA-E9-A1NG-01A	BRCA	7.01164
TCGA-A8-A07L-01A	BRCA	1.90602
TCGA-E2-A15L-01A	BRCA	3.02192
TCGA-D8-A1JI-01A	BRCA	1.90602
TCGA-GM-A2DO-01A	BRCA	0.716306
TCGA-EW-A1P6-01A	BRCA	4.05314
TCGA-AR-A1AI-01A	BRCA	3.29728
TCGA-AR-A0U3-01A	BRCA	1.90602
TCGA-A2-A0ES-01A	BRCA	7.01164
TCGA-A8-A06P-01A	BRCA	3.02192
TCGA-S3-AA12-01A	BRCA	3.02192
TCGA-E9-A3Q9-01A	BRCA	3.02192
TCGA-BH-A0HX-01A	BRCA	5.22771
TCGA-AC-A3W7-01A	BRCA	5.22771
TCGA-AO-A124-01A	BRCA	2.36186
TCGA-AC-A5XU-01A	BRCA	1.36529
TCGA-LL-A6FQ-01A	BRCA	2.36186
TCGA-AQ-A1H2-01A	BRCA	1.90602
TCGA-BH-A0DQ-01A	BRCA	5.22771
TCGA-E2-A106-01A	BRCA	1.90602
TCGA-A2-A25F-01A	BRCA	7.01164
TCGA-AN-A0AT-01A	BRCA	2.32026
TCGA-D8-A27T-01A	BRCA	3.02192
TCGA-A2-A04X-01A	BRCA	2.32026
TCGA-A2-A3XT-01A	BRCA	0.960742
TCGA-AR-A0TY-01A	BRCA	1.90602
TCGA-A2-A0YG-01A	BRCA	1.90602
TCGA-B6-A0WZ-01A	BRCA	1.90602
TCGA-A7-A5ZX-01A	BRCA	3.02192
TCGA-AC-A23G-01A	BRCA	5.22771
TCGA-GM-A2DA-01A	BRCA	3.74463
TCGA-B6-A0X1-01A	BRCA	1.72993
TCGA-AO-A12E-01A	BRCA	5.22771
TCGA-AR-A250-01A	BRCA	5.22771
TCGA-A8-A06O-01A	BRCA	3.02192
TCGA-AO-A12G-01A	BRCA	3.02192
TCGA-A7-A3IY-01A	BRCA	5.02248
TCGA-BH-A1EY-01A	BRCA	5.22771
TCGA-A8-A079-01A	BRCA	3.02192
TCGA-AO-A03P-01A	BRCA	1.36529
TCGA-E2-A572-01A	BRCA	1
TCGA-A2-A0YH-01A	BRCA	3.02192
TCGA-E2-A15G-01A	BRCA	3.02192
TCGA-C8-A12M-01A	BRCA	1.90602
TCGA-AR-A0TV-01A	BRCA	1
TCGA-A7-A13G-01B	BRCA	5.22771
TCGA-A8-A07E-01A	BRCA	5.22771
TCGA-E9-A1N9-01A	BRCA	2.16462
TCGA-BH-A0H3-01A	BRCA	4.05314
TCGA-AR-A1AY-01A	BRCA	3.29728
TCGA-A2-A0D4-01A	BRCA	1.90602
TCGA-E9-A5UO-01A	BRCA	1.90602
TCGA-GM-A2DL-01A	BRCA	3.74463
TCGA-EW-A1PD-01A	BRCA	5.22771
TCGA-A1-A0SI-01A	BRCA	1.90602
TCGA-A2-A0CV-01A	BRCA	4.05314
TCGA-E2-A15E-06A	BRCA	1.90602
TCGA-AO-A12B-01A	BRCA	1.90602
TCGA-B6-A408-01A	BRCA	1.90602
TCGA-OL-A5D7-01A	BRCA	1.72993
TCGA-A2-A0EW-01A	BRCA	7.01164
TCGA-A2-A0T4-01A	BRCA	3.02192
TCGA-C8-A131-01A	BRCA	2.36186
TCGA-BH-A1EN-01A	BRCA	7.01164
TCGA-D8-A3Z5-01A	BRCA	3.02192
TCGA-E9-A247-01A	BRCA	1.36529
TCGA-C8-A12Q-01A	BRCA	1.36529
TCGA-E2-A1BD-01A	BRCA	3.02192
TCGA-E9-A1RI-01A	BRCA	7.01164
TCGA-E2-A105-01A	BRCA	1.90602
TCGA-D8-A1JK-01A	BRCA	1.58546
TCGA-BH-A0BJ-01A	BRCA	5.22771
TCGA-S3-AA14-01A	BRCA	3.02192
TCGA-C8-A26V-01A	BRCA	3.02192
TCGA-BH-A1FB-01A	BRCA	7.01164
TCGA-D8-A1JP-01A	BRCA	1.90602
TCGA-E2-A14X-01A	BRCA	2.16462
TCGA-BH-A0E2-01A	BRCA	3.29728
TCGA-PL-A8LZ-01A	BRCA	1.90602
TCGA-LL-A740-01A	BRCA	3.74463
TCGA-D8-A1X7-01A	BRCA	1.36529
TCGA-AO-A0JD-01A	BRCA	1.36529
TCGA-D8-A1X5-01A	BRCA	3.29728
TCGA-E9-A22E-01A	BRCA	5.02248
TCGA-AC-A23E-01A	BRCA	7.01164
TCGA-AR-A0U2-01A	BRCA	1.90602
TCGA-A2-A1FV-01A	BRCA	2.16462
TCGA-A8-A09B-01A	BRCA	1.90602
TCGA-AN-A0XO-01A	BRCA	3.02192
TCGA-A7-A425-01A	BRCA	5.22771
TCGA-A2-A0CZ-01A	BRCA	3.02192
TCGA-GM-A3NY-01A	BRCA	0.716306
TCGA-AR-A0U0-01A	BRCA	2.63506
TCGA-AR-A24P-01A	BRCA	3.02192
TCGA-AN-A0G0-01A	BRCA	2.36186
TCGA-AN-A0AM-01A	BRCA	1.36529
TCGA-BH-A0E6-01A	BRCA	0.716306
TCGA-E9-A248-01A	BRCA	1.36529
TCGA-B6-A1KN-01A	BRCA	2.55645
TCGA-LL-A9Q3-01A	BRCA	1
TCGA-A8-A08B-01A	BRCA	0.716306
TCGA-A1-A0SG-01A	BRCA	3.02192
TCGA-BH-A0H0-01A	BRCA	3.02192
TCGA-D8-A1XR-01A	BRCA	1.90602
TCGA-C8-A12P-01A	BRCA	5.02248
TCGA-LL-A50Y-01A	BRCA	1
TCGA-AO-A03N-01B	BRCA	1.36529
TCGA-E2-A1IU-01A	BRCA	3.02192
TCGA-EW-A1IX-01A	BRCA	5.22771
TCGA-A2-A0EV-01A	BRCA	1.90602
TCGA-AC-A3W5-01A	BRCA	5.22771
TCGA-AR-A2LN-01A	BRCA	3.02192
TCGA-E9-A1QZ-01A	BRCA	3.02192
TCGA-BH-A8FY-01A	BRCA	1.36529
TCGA-AC-A6IX-06A	BRCA	1.90602
TCGA-AR-A1AL-01A	BRCA	7.01164
TCGA-BH-A42T-01A	BRCA	3.02192
TCGA-BH-A0B9-01A	BRCA	0.716306
TCGA-AO-A0J8-01A	BRCA	1.90602
TCGA-BH-A2L8-01A	BRCA	3.02192
TCGA-E9-A1N5-01A	BRCA	2.74273
TCGA-A8-A075-01A	BRCA	1.90602
TCGA-AN-A0FZ-01A	BRCA	3.02192
TCGA-D8-A1XJ-01A	BRCA	1.90602
TCGA-E2-A15F-01A	BRCA	3.02192
TCGA-A2-A0EP-01A	BRCA	2.63506
TCGA-BH-A18K-01A	BRCA	3.29728
TCGA-AR-A5QN-01A	BRCA	5.22771
TCGA-E9-A244-01A	BRCA	5.02248
TCGA-A8-A0A2-01A	BRCA	3.02192
TCGA-B6-A40C-01A	BRCA	3.29728
TCGA-AR-A2LQ-01A	BRCA	5.22771
TCGA-EW-A1J6-01A	BRCA	1
TCGA-EW-A1IZ-01A	BRCA	0.960742
TCGA-AC-A2FG-01A	BRCA	5.22771
TCGA-A8-A09Z-01A	BRCA	1
TCGA-EW-A1P1-01A	BRCA	7.01164
TCGA-A8-A0A9-01A	BRCA	5.22771
TCGA-BH-A0DT-01A	BRCA	3.02192
TCGA-A2-A0T2-01A	BRCA	7.01164
TCGA-A7-A4SA-01A	BRCA	1.90602
TCGA-D8-A27F-01A	BRCA	2.55645
TCGA-D8-A146-01A	BRCA	5.22771
TCGA-D8-A27E-01A	BRCA	3.02192
TCGA-C8-A138-01A	BRCA	2.36186
TCGA-E2-A14V-01A	BRCA	1.90602
TCGA-AC-A5EH-01A	BRCA	4.05314
TCGA-A2-A0YL-01A	BRCA	5.22771
TCGA-E2-A1LK-01A	BRCA	7.01164
TCGA-D8-A13Z-01A	BRCA	2.36186
TCGA-D8-A27V-01A	BRCA	5.22771
TCGA-EW-A3U0-01A	BRCA	1.90602
TCGA-A2-A4S2-01A	BRCA	1.90602
TCGA-D8-A1XV-01A	BRCA	1.36529
TCGA-BH-A1F0-01A	BRCA	7.01164
TCGA-AN-A0FT-01A	BRCA	1.36529
TCGA-E2-A15K-01A	BRCA	1.90602
TCGA-BH-A0DL-01A	BRCA	7.01164
TCGA-A2-A0EY-01A	BRCA	1.90602
TCGA-B6-A0IG-01A	BRCA	1.36529
TCGA-BH-A0HI-01A	BRCA	1.90602
TCGA-E2-A576-01A	BRCA	1.36529
TCGA-BH-A201-01A	BRCA	7.01164
TCGA-D8-A1JB-01A	BRCA	2.55645
TCGA-A1-A0SN-01A	BRCA	1.90602
TCGA-A8-A08A-01A	BRCA	1.90602
TCGA-A2-A0YI-01A	BRCA	1.90602
TCGA-AR-A1AN-01A	BRCA	7.01164
TCGA-AR-A2LM-01A	BRCA	3.02192
TCGA-AR-A5QQ-01A	BRCA	7.01164
TCGA-AR-A0TR-01A	BRCA	1.90602
TCGA-GM-A3XG-01A	BRCA	5.02248
TCGA-BH-A1FC-01A	BRCA	2.74273
TCGA-A2-A0D1-01A	BRCA	2.16462
TCGA-EW-A1P7-01A	BRCA	5.02248
TCGA-AR-A1AP-01A	BRCA	3.02192
TCGA-E2-A150-01A	BRCA	5.02248
TCGA-EW-A2FW-01A	BRCA	1.90602
TCGA-AR-A1AV-01A	BRCA	2.16462
TCGA-A2-A0T1-01A	BRCA	3.74463
TCGA-AO-A0JF-01A	BRCA	7.01164
TCGA-OL-A6VR-01A	BRCA	3.02192
TCGA-A8-A090-01A	BRCA	5.22771
TCGA-BH-A0BG-01A	BRCA	2.63506
TCGA-AO-A1KP-01A	BRCA	1.36529
TCGA-LL-A441-01A	BRCA	1.36529
TCGA-C8-A133-01A	BRCA	1
TCGA-BH-A8FZ-01A	BRCA	3.02192
TCGA-E2-A1II-01A	BRCA	1.90602
TCGA-EW-A6SC-01A	BRCA	5.22771
TCGA-AN-A0XT-01A	BRCA	3.02192
TCGA-BH-A0RX-01A	BRCA	2.36186
TCGA-A8-A08X-01A	BRCA	7.01164
TCGA-AO-A03V-01A	BRCA	3.02192
TCGA-EW-A1PH-01A	BRCA	3.74463
TCGA-A2-A0ST-01A	BRCA	0.716306
TCGA-BH-A0BC-01A	BRCA	5.22771
TCGA-E9-A1NH-01A	BRCA	5.22771
TCGA-B6-A0X5-01A	BRCA	2.16462
TCGA-AC-A4ZE-01A	BRCA	3.02192
TCGA-A8-A07Z-01A	BRCA	1
TCGA-OL-A66P-01A	BRCA	1.58546
TCGA-E2-A1LE-01A	BRCA	1.90602
TCGA-C8-A8HR-01A	BRCA	5.22771
TCGA-A8-A09T-01A	BRCA	3.02192
TCGA-BH-A0HB-01A	BRCA	7.01164
TCGA-A8-A08G-01A	BRCA	1.90602
TCGA-A2-A0EQ-01A	BRCA	0.716306
TCGA-A8-A081-01A	BRCA	1.58546
TCGA-AO-A1KO-01A	BRCA	4.05314
TCGA-BH-A0HW-01A	BRCA	3.02192
TCGA-OL-A66H-01A	BRCA	1.90602
TCGA-A2-A0T0-01A	BRCA	3.16784
TCGA-AN-A04C-01A	BRCA	1.90602
TCGA-E2-A573-01A	BRCA	2.36186
TCGA-AN-A0XS-01A	BRCA	3.02192
TCGA-D8-A3Z6-01A	BRCA	1.90602
TCGA-EW-A3E8-01B	BRCA	1.58546
TCGA-C8-A137-01A	BRCA	7.01164
TCGA-GM-A4E0-01A	BRCA	7.01164
TCGA-E2-A1B4-01A	BRCA	2.16462
TCGA-EW-A2FS-01A	BRCA	1.13567
TCGA-S3-A6ZG-01A	BRCA	1.90602
TCGA-GM-A3XN-01A	BRCA	5.22771
TCGA-EW-A1P8-01A	BRCA	2.36186
TCGA-E2-A156-01A	BRCA	3.02192
TCGA-AC-A8OP-01A	BRCA	1.90602
TCGA-AN-A0FS-01A	BRCA	5.22771
TCGA-B6-A0IM-01A	BRCA	3.02192
TCGA-E9-A3HO-01A	BRCA	1.36529
TCGA-D8-A27K-01A	BRCA	3.02192
TCGA-E9-A2JT-01A	BRCA	1.34125
TCGA-GM-A2DK-01A	BRCA	3.74463
TCGA-AR-A1AK-01A	BRCA	3.02192
TCGA-E2-A15R-01A	BRCA	1.90602
TCGA-BH-A18Q-01A	BRCA	5.02248
TCGA-E2-A153-01A	BRCA	4.05314
TCGA-BH-A0BT-01A	BRCA	3.02192
TCGA-E9-A54Y-01A	BRCA	1
TCGA-E2-A14Q-01A	BRCA	3.29728
TCGA-BH-A0HN-01A	BRCA	1.90602
TCGA-E2-A1IK-01A	BRCA	1.90602
TCGA-E2-A10C-01A	BRCA	0.716306
TCGA-A8-A095-01A	BRCA	1.90602
TCGA-A7-A0DB-01A	BRCA	4.05314
TCGA-BH-A18J-01A	BRCA	3.02192
TCGA-BH-A28O-01A	BRCA	5.22771
TCGA-AC-A3TN-01A	BRCA	1.90602
TCGA-A7-A13E-01A	BRCA	5.02248
TCGA-BH-A0W5-01A	BRCA	4.05314
TCGA-GM-A2DD-01A	BRCA	1.13567
TCGA-AN-A0XV-01A	BRCA	4.05314
TCGA-E2-A1IL-01A	BRCA	3.02192
TCGA-EW-A2FR-01A	BRCA	3.74463
TCGA-3C-AAAU-01A	BRCA	3.02192
TCGA-AR-A24W-01A	BRCA	7.01164
TCGA-OL-A5RZ-01A	BRCA	1.90602
TCGA-E9-A1RB-01A	BRCA	1.90602
TCGA-AN-A0AJ-01A	BRCA	1.90602
TCGA-AR-A1AT-01A	BRCA	3.02192
TCGA-A8-A09Q-01A	BRCA	4.05314
TCGA-A8-A083-01A	BRCA	1
TCGA-AN-A0XL-01A	BRCA	5.22771
TCGA-E9-A1RC-01A	BRCA	3.02192
TCGA-D8-A27I-01A	BRCA	3.02192
TCGA-A2-A04Y-01A	BRCA	1.36529
TCGA-PE-A5DC-01A	BRCA	3.02192
TCGA-OL-A5D8-01A	BRCA	1.90602
TCGA-A7-A26E-01A	BRCA	7.01164
TCGA-AN-A0FL-01A	BRCA	1.36529
TCGA-A8-A0A1-01A	BRCA	1.90602
TCGA-AN-A0FN-01A	BRCA	3.74463
TCGA-D8-A1J9-01A	BRCA	5.22771
TCGA-BH-A1EO-01A	BRCA	4.05314
TCGA-B6-A0I2-01A	BRCA	0.716306
TCGA-E9-A5UP-01A	BRCA	1.58546
TCGA-A2-A0T5-01A	BRCA	2.55645
TCGA-A7-A0DA-01A	BRCA	7.01164
TCGA-B6-A0IC-01A	BRCA	1
TCGA-BH-A5J0-01A	BRCA	0.716306
TCGA-A2-A0CY-01A	BRCA	1.36529
TCGA-E9-A245-01A	BRCA	1.90602
TCGA-GM-A3NW-01A	BRCA	3.02192
TCGA-A1-A0SB-01A	BRCA	5.22771
TCGA-OL-A66N-01A	BRCA	3.74463
TCGA-A2-A0CQ-01A	BRCA	1
TCGA-C8-A1HG-01A	BRCA	1.36529
TCGA-AC-A2BK-01A	BRCA	3.02192
TCGA-A8-A08J-01A	BRCA	3.02192
TCGA-A8-A09V-01A	BRCA	3.02192
TCGA-A2-A0T3-01A	BRCA	1.90602
TCGA-C8-A1HK-01A	BRCA	1.36529
TCGA-AN-A04A-01A	BRCA	4.05314
TCGA-E9-A1RG-01A	BRCA	1
TCGA-JL-A3YW-01A	BRCA	3.74463
TCGA-E2-A154-01A	BRCA	1.90602
TCGA-A2-A04U-01A	BRCA	1.36529
TCGA-BH-A0EE-01A	BRCA	1.23916
TCGA-BH-A0H5-01A	BRCA	1
TCGA-EW-A1IW-01A	BRCA	5.22771
TCGA-AO-A0J4-01A	BRCA	7.01164
TCGA-A7-A3J1-01A	BRCA	3.02192
TCGA-E9-A243-01A	BRCA	1.90602
TCGA-C8-A134-01A	BRCA	1.90602
TCGA-D8-A1Y1-01A	BRCA	4.05314
TCGA-AO-A12A-01A	BRCA	1.90602
TCGA-E2-A108-01A	BRCA	7.01164
TCGA-BH-A0E1-01A	BRCA	1.90602
TCGA-E2-A14U-01A	BRCA	3.02192
TCGA-BH-A0HL-01A	BRCA	1.90602
TCGA-E9-A229-01A	BRCA	3.29728
TCGA-A8-A08T-01A	BRCA	2.55645
TCGA-E9-A1RF-01A	BRCA	1.90602
TCGA-A2-A04T-01A	BRCA	1.72993
TCGA-E2-A15P-01A	BRCA	3.02192
TCGA-C8-A3M8-01A	BRCA	3.02192
TCGA-LL-A5YO-01A	BRCA	0.716306
TCGA-OL-A66L-01A	BRCA	1.58546
TCGA-OL-A66K-01A	BRCA	1.36529
TCGA-E2-A1LG-01A	BRCA	1.90602
TCGA-E2-A1LS-01A	BRCA	1.36529
TCGA-A7-A426-01A	BRCA	5.22771
TCGA-BH-A0B7-01A	BRCA	2.16462
TCGA-AC-A2FO-01A	BRCA	3.02192
TCGA-D8-A27L-01A	BRCA	5.22771
TCGA-AC-A2FF-01A	BRCA	5.22771
TCGA-GM-A2D9-01A	BRCA	1.36529
TCGA-A2-A0D3-01A	BRCA	1.90602
TCGA-A2-A0EO-01A	BRCA	3.02192
TCGA-A2-A0T7-01A	BRCA	1.90602
TCGA-OL-A6VO-01A	BRCA	1.13567
TCGA-BH-A0EI-01A	BRCA	5.22771
TCGA-A8-A094-01A	BRCA	3.16784
TCGA-A8-A092-01A	BRCA	3.02192
TCGA-AC-A3W6-01A	BRCA	5.22771
TCGA-BH-A0BA-01A	BRCA	2.90328
TCGA-EW-A1OX-01A	BRCA	1.90602
TCGA-A2-A0CR-01A	BRCA	1
TCGA-D8-A1JD-01A	BRCA	1.90602
TCGA-C8-A26X-01A	BRCA	1.52322
TCGA-A1-A0SE-01A	BRCA	3.02192
TCGA-A7-A4SF-01A	BRCA	1.36529
TCGA-OL-A66O-01A	BRCA	1.90602
TCGA-C8-A26W-01A	BRCA	1.90602
TCGA-E2-A9RU-01A	BRCA	1
TCGA-AN-A0FW-01A	BRCA	1.90602
TCGA-D8-A1JC-01A	BRCA	1.90602
TCGA-C8-A12V-01A	BRCA	1.72993
TCGA-A2-A04P-01A	BRCA	0.960742
TCGA-BH-A0W3-01A	BRCA	3.02192
TCGA-BH-A0B5-01A	BRCA	3.02192
TCGA-S3-AA10-01A	BRCA	3.67868
TCGA-BH-A0B0-01A	BRCA	5.22771
TCGA-E2-A574-01A	BRCA	1.66202
TCGA-AN-A0XN-01A	BRCA	7.01164
TCGA-AN-A0XW-01A	BRCA	4.42247
TCGA-C8-A1HF-01A	BRCA	2.36186
TCGA-AR-A2LO-01A	BRCA	5.22771
TCGA-D8-A1XA-01A	BRCA	3.02192
TCGA-BH-A0BL-01A	BRCA	5.22771
TCGA-EW-A1J2-01A	BRCA	7.01164
TCGA-BH-A0AZ-01A	BRCA	5.22771
TCGA-E9-A227-01A	BRCA	1.90602
TCGA-A2-A0D2-01A	BRCA	5.22771
TCGA-D8-A1XM-01A	BRCA	3.29728
TCGA-D8-A1Y3-01A	BRCA	1
TCGA-C8-A275-01A	BRCA	3.29728
TCGA-E2-A3DX-01A	BRCA	3.02192
TCGA-C8-A1HM-01A	BRCA	1
TCGA-E2-A158-01A	BRCA	1.90602
TCGA-AR-A0TP-01A	BRCA	4.42247
TCGA-A7-A26F-01B	BRCA	7.01164
TCGA-A2-A1FW-01A	BRCA	3.02192
TCGA-E2-A15A-06A	BRCA	1.90602
TCGA-BH-A0C7-01B	BRCA	1.90602
TCGA-AR-A1AJ-01A	BRCA	1.72993
TCGA-E9-A1R5-01A	BRCA	3.02192
TCGA-A8-A09A-01A	BRCA	5.22771
TCGA-GM-A2DC-01A	BRCA	1.90602
TCGA-A2-A3KC-01A	BRCA	3.02192
TCGA-AO-A0J9-01A	BRCA	1.66202
TCGA-E2-A14Y-01A	BRCA	2.36186
TCGA-D8-A4Z1-01A	BRCA	5.22771
TCGA-3C-AALI-01A	BRCA	1
TCGA-E2-A159-01A	BRCA	4.42247
TCGA-E2-A155-01A	BRCA	1.90602
TCGA-A8-A082-01A	BRCA	5.22771
TCGA-E2-A14R-01A	BRCA	2.16462
TCGA-D8-A141-01A	BRCA	5.22771
TCGA-BH-A204-01A	BRCA	1.90602
TCGA-E2-A109-01A	BRCA	1.90602
TCGA-C8-A1HJ-01A	BRCA	3.16784
TCGA-BH-A0C1-01B	BRCA	2.16462
TCGA-D8-A1Y2-01A	BRCA	7.01164
TCGA-AR-A2LJ-01A	BRCA	1
TCGA-AC-A2QH-01B	BRCA	3.02192
TCGA-A2-A0YK-01A	BRCA	7.01164
TCGA-E9-A22H-01A	BRCA	1.90602
TCGA-E2-A1L8-01A	BRCA	5.02248
TCGA-BH-A0B8-01A	BRCA	5.22771
TCGA-BH-A18G-01A	BRCA	3.16784
TCGA-JL-A3YX-01A	BRCA	1.36529
TCGA-S3-AA17-01A	BRCA	1.58546
TCGA-E2-A15M-01A	BRCA	3.16784
TCGA-E2-A56Z-01A	BRCA	1.90602
TCGA-A7-A0CH-01A	BRCA	1.90602
TCGA-AR-A0TZ-01A	BRCA	1.90602
TCGA-E2-A15I-01A	BRCA	1.90602
TCGA-BH-A0B4-01A	BRCA	3.02192
TCGA-E2-A15K-06A	BRCA	1.90602
TCGA-BH-A0WA-01A	BRCA	3.29728
TCGA-A2-A0ET-01A	BRCA	1.90602
TCGA-OL-A5RW-01A	BRCA	5.22771
TCGA-A7-A13D-01B	BRCA	5.02248
TCGA-AN-A0FD-01A	BRCA	1.90602
TCGA-BH-A0H7-01A	BRCA	1.90602
TCGA-LL-A5YL-01A	BRCA	0.716306
TCGA-A2-A0D0-01A	BRCA	1.66202
TCGA-AO-A129-01A	BRCA	1.23916
TCGA-BH-A1EW-01A	BRCA	3.02192
TCGA-AO-A03M-01B	BRCA	1.90602
TCGA-B6-A0RP-01A	BRCA	3.02192
TCGA-E2-A15T-01A	BRCA	2.55645
TCGA-A2-A4RW-01A	BRCA	1.90602
TCGA-A8-A08O-01A	BRCA	5.22771
TCGA-BH-A18I-01A	BRCA	3.02192
TCGA-BH-A0BM-01A	BRCA	4.05314
TCGA-E2-A14N-01A	BRCA	1.66202
TCGA-5L-AAT0-01A	BRCA	1.90602
TCGA-BH-A6R9-01A	BRCA	5.22771
TCGA-EW-A1PG-01A	BRCA	7.01164
TCGA-AN-A03Y-01A	BRCA	1.90602
TCGA-B6-A0RT-01A	BRCA	1
TCGA-A2-A25D-01A	BRCA	3.02192
TCGA-A7-A56D-01A	BRCA	1.72993
TCGA-D8-A73W-01A	BRCA	3.02192
TCGA-AO-A0J5-01A	BRCA	5.22771
TCGA-A2-A1G6-01A	BRCA	7.01164
TCGA-AC-A3OD-01B	BRCA	3.02192
TCGA-A7-A0CJ-01A	BRCA	1.90602
TCGA-A8-A07U-01A	BRCA	1.58546
TCGA-D8-A1XS-01A	BRCA	4.05314
TCGA-B6-A0I8-01A	BRCA	3.02192
TCGA-LL-A5YM-01A	BRCA	1.72993
TCGA-E2-A15E-01A	BRCA	4.05314
TCGA-D8-A27G-01A	BRCA	5.22771
TCGA-BH-A1EX-01A	BRCA	7.01164
TCGA-A8-A076-01A	BRCA	1.90602
TCGA-EW-A1OV-01A	BRCA	0.960742
TCGA-B6-A0X7-01A	BRCA	3.02192
TCGA-B6-A0WT-01A	BRCA	3.29728
TCGA-A2-A4S3-01A	BRCA	3.02192
TCGA-BH-A0BZ-01A	BRCA	3.29728
TCGA-OL-A5RU-01A	BRCA	1
TCGA-D8-A73U-01A	BRCA	1.23916
TCGA-A2-A0YT-01A	BRCA	1.90602
TCGA-A1-A0SK-01A	BRCA	4.42247
TCGA-E9-A295-01A	BRCA	5.22771
TCGA-AR-A1AR-01A	BRCA	1.66202
TCGA-D8-A1XY-01A	BRCA	3.02192
TCGA-LL-A8F5-01A	BRCA	2.32026
TCGA-E9-A1R6-01A	BRCA	3.02192
TCGA-BH-A1FL-01A	BRCA	3.02192
TCGA-E9-A1RE-01A	BRCA	3.02192
TCGA-D8-A1JN-01A	BRCA	1.36529
TCGA-D8-A145-01A	BRCA	5.22771
TCGA-B6-A0IK-01A	BRCA	3.29728
TCGA-C8-A1HE-01A	BRCA	3.02192
TCGA-A8-A0AB-01A	BRCA	3.02192
TCGA-EW-A1J3-01A	BRCA	1.8312
TCGA-GI-A2C8-01A	BRCA	3.02192
TCGA-A2-A0YJ-01A	BRCA	5.02248
TCGA-A8-A0A7-01A	BRCA	1.72993
TCGA-A8-A08L-01A	BRCA	1.90602
TCGA-BH-A0H6-01A	BRCA	3.02192
TCGA-D8-A1XL-01A	BRCA	1
TCGA-E2-A10B-01A	BRCA	1.90602
TCGA-E9-A228-01A	BRCA	1.90602
TCGA-A2-A3KD-01A	BRCA	3.02192
TCGA-AQ-A7U7-01A	BRCA	3.02192
TCGA-AO-A1KS-01A	BRCA	1.36529
TCGA-A7-A0DC-01B	BRCA	3.02192
TCGA-BH-A0EB-01A	BRCA	5.22771
TCGA-C8-A12W-01A	BRCA	3.02192
TCGA-AR-A24L-01A	BRCA	5.22771
TCGA-EW-A1PB-01A	BRCA	1.72993
TCGA-D8-A1JJ-01A	BRCA	3.29728
TCGA-C8-A12Z-01A	BRCA	3.29728
TCGA-A8-A09X-01A	BRCA	4.05314
TCGA-AC-A62Y-01A	BRCA	1.8312
TCGA-AC-A3YJ-01A	BRCA	1.36529
TCGA-E9-A22G-01A	BRCA	0.716306
TCGA-GM-A5PX-01A	BRCA	3.02192
TCGA-A2-A4RX-01A	BRCA	5.02248
TCGA-B6-A0WW-01A	BRCA	1.90602
TCGA-A2-A0SV-01A	BRCA	2.55645
TCGA-AR-A24U-01A	BRCA	4.05314
TCGA-B6-A0X0-01A	BRCA	0.716306
TCGA-BH-A0EA-01A	BRCA	7.01164
TCGA-LL-A440-01A	BRCA	7.01164
TCGA-A1-A0SQ-01A	BRCA	1.90602
TCGA-A8-A09N-01A	BRCA	3.02192
TCGA-AC-A3QQ-01B	BRCA	3.02192
TCGA-BH-A18V-06A	BRCA	1
TCGA-BH-A18H-01A	BRCA	3.02192
TCGA-E2-A1LH-01A	BRCA	2.63506
TCGA-C8-A27A-01A	BRCA	1.90602
TCGA-E9-A1R4-01A	BRCA	1.90602
TCGA-A2-A3XU-01A	BRCA	3.16784
TCGA-HN-A2NL-01A	BRCA	1.90602
TCGA-BH-A0BO-01A	BRCA	7.01164
TCGA-D8-A1Y0-01A	BRCA	5.22771
TCGA-B6-A40B-01A	BRCA	5.22771
TCGA-PL-A8LX-01A	BRCA	1.90602
TCGA-B6-A1KF-01A	BRCA	2.36186
TCGA-AO-A0J7-01A	BRCA	1.90602
TCGA-EW-A2FV-01A	BRCA	3.02192
TCGA-AR-A252-01A	BRCA	1.90602
TCGA-AN-A0XR-01A	BRCA	1.90602
TCGA-A2-A0YC-01A	BRCA	1.90602
TCGA-A8-A07P-01A	BRCA	3.02192
TCGA-E9-A3X8-01A	BRCA	1.72993
TCGA-AC-A2B8-01A	BRCA	4.05314
TCGA-AO-A0JL-01A	BRCA	1.36529
TCGA-D8-A27W-01A	BRCA	1.90602
TCGA-B6-A0RO-01A	BRCA	1.90602
TCGA-BH-A0DE-01A	BRCA	7.01164
TCGA-D8-A147-01A	BRCA	3.74463
TCGA-BH-A202-01A	BRCA	1.90602
TCGA-BH-A18R-01A	BRCA	2.55645
TCGA-B6-A0RV-01A	BRCA	3.02192
TCGA-D8-A27P-01A	BRCA	1.90602
TCGA-BH-A0W7-01A	BRCA	3.29728
TCGA-AC-A7VB-01A	BRCA	1.90602
TCGA-AN-A046-01A	BRCA	3.02192
TCGA-A2-A0SX-01A	BRCA	2.16462
TCGA-A8-A06N-01A	BRCA	3.02192
TCGA-BH-A8G0-01A	BRCA	5.22771
TCGA-BH-A0HP-01A	BRCA	3.02192
TCGA-BH-A18U-01A	BRCA	2.55645
TCGA-AN-A0AS-01A	BRCA	7.01164
TCGA-AO-A0JC-01A	BRCA	0.960742
TCGA-BH-A1F2-01A	BRCA	2.90328
TCGA-BH-A18M-01A	BRCA	5.22771
TCGA-C8-A12L-01A	BRCA	1.90602
TCGA-E9-A1R7-01A	BRCA	1.90602
TCGA-BH-A1FH-01A	BRCA	5.22771
TCGA-AR-A24V-01A	BRCA	3.02192
TCGA-AC-A6IX-01A	BRCA	3.02192
TCGA-D8-A1JH-01A	BRCA	5.22771
TCGA-BH-A1FE-01A	BRCA	3.02192
TCGA-A2-A25C-01A	BRCA	1.36529
TCGA-B6-A0IQ-01A	BRCA	1.36529
TCGA-AO-A0JI-01A	BRCA	3.02192
TCGA-B6-A0IA-01A	BRCA	1
TCGA-E2-A1L7-01A	BRCA	1.90602
TCGA-BH-A18F-01A	BRCA	7.01164
TCGA-C8-A1HI-01A	BRCA	4.42247
TCGA-A2-A0YD-01A	BRCA	5.22771
TCGA-A8-A06U-01A	BRCA	1.90602
TCGA-BH-A18S-01A	BRCA	3.02192
TCGA-A8-A08S-01A	BRCA	3.02192
TCGA-A8-A08C-01A	BRCA	1.90602
TCGA-C8-A1HO-01A	BRCA	1.90602
TCGA-AO-A0JG-01A	BRCA	4.05314
TCGA-E9-A1NF-01A	BRCA	7.01164
TCGA-AO-A0J6-01A	BRCA	3.67868
TCGA-LL-A5YP-01A	BRCA	3.29728
TCGA-BH-A0DI-01A	BRCA	5.22771
TCGA-BH-A1FJ-01A	BRCA	3.02192
TCGA-UU-A93S-01A	BRCA	0.716306
TCGA-A2-A0YE-01A	BRCA	1.90602
TCGA-BH-A209-01A	BRCA	0.960742
TCGA-OL-A5RX-01A	BRCA	5.02248
TCGA-E2-A15D-01A	BRCA	3.02192
TCGA-D8-A27H-01A	BRCA	7.01164
TCGA-BH-A1F6-01A	BRCA	7.01164
TCGA-A1-A0SD-01A	BRCA	3.02192
TCGA-A7-A26J-01B	BRCA	2.55645
TCGA-D8-A1XC-01A	BRCA	1.90602
TCGA-A2-A04R-01A	BRCA	1.90602
TCGA-LD-A66U-01A	BRCA	1
TCGA-E2-A15O-01A	BRCA	1.36529
TCGA-AR-A24T-01A	BRCA	3.02192
TCGA-BH-A0HO-01A	BRCA	1.90602
TCGA-A7-A6VW-01A	BRCA	1.96463
TCGA-BH-A0HY-01A	BRCA	3.02192
TCGA-3C-AALJ-01A	BRCA	3.29728
TCGA-BH-AB28-01A	BRCA	3.02192
TCGA-A7-A0CG-01A	BRCA	3.02192
TCGA-A8-A08H-01A	BRCA	7.01164
TCGA-B6-A0WV-01A	BRCA	1.90602
TCGA-D8-A1XF-01A	BRCA	1.90602
TCGA-BH-A0BQ-01A	BRCA	5.22771
TCGA-EW-A1PC-01B	BRCA	1.90602
TCGA-A8-A08I-01A	BRCA	1
TCGA-B6-A0X4-01A	BRCA	1.90602
TCGA-E9-A2JS-01A	BRCA	1.90602
TCGA-A8-A096-01A	BRCA	7.01164
TCGA-B6-A0WY-01A	BRCA	5.22771
TCGA-A8-A09E-01A	BRCA	3.02192
TCGA-BH-A1ES-06A	BRCA	0.716306
TCGA-EW-A1OW-01A	BRCA	2.36186
TCGA-D8-A1XD-01A	BRCA	1.90602
TCGA-E9-A54X-01A	BRCA	1.36529
TCGA-B6-A0RG-01A	BRCA	3.29728
TCGA-A8-A097-01A	BRCA	4.05314
TCGA-A2-A0CX-01A	BRCA	1.90602
TCGA-E9-A5FK-01A	BRCA	0.716306
TCGA-C8-A8HQ-01A	BRCA	5.22771
TCGA-BH-A0BP-01A	BRCA	7.01164
TCGA-B6-A0RL-01A	BRCA	1.90602
TCGA-A8-A08F-01A	BRCA	7.01164
TCGA-A2-A0CK-01A	BRCA	3.02192
TCGA-E9-A1N4-01A	BRCA	4.42247
TCGA-D8-A1XZ-01A	BRCA	1.90602
TCGA-AR-A1AS-01A	BRCA	2.55645
TCGA-EW-A424-01A	BRCA	2.16462
TCGA-A7-A3RF-01A	BRCA	1.90602
TCGA-AR-A24H-01A	BRCA	2.55645
TCGA-A8-A06T-01A	BRCA	1.90602
TCGA-C8-A1HL-01A	BRCA	1.36529
TCGA-D8-A1X8-01A	BRCA	3.02192
TCGA-AO-A1KT-01A	BRCA	3.02192
TCGA-B6-A0RQ-01A	BRCA	7.01164
TCGA-AR-A1AQ-01A	BRCA	2.36186
TCGA-OL-A5D6-01A	BRCA	2.16462
TCGA-A8-A091-01A	BRCA	3.02192
TCGA-A7-A4SE-01A	BRCA	3.29728
TCGA-AC-A2FE-01A	BRCA	3.02192
TCGA-C8-A26Z-01A	BRCA	1.90602
TCGA-C8-A12Y-01A	BRCA	1.72993
TCGA-A7-A13F-01A	BRCA	3.02192
TCGA-BH-A28Q-01A	BRCA	3.02192
TCGA-GM-A5PV-01A	BRCA	1.36529
TCGA-A7-A4SC-01A	BRCA	3.02192
TCGA-A8-A09G-01A	BRCA	1.90602
TCGA-E2-A15H-01A	BRCA	1.90602
TCGA-A7-A13E-01B	BRCA	2.90328
TCGA-B6-A0IH-01A	BRCA	3.02192
TCGA-A2-A1G4-01A	BRCA	4.05314
TCGA-A8-A093-01A	BRCA	3.02192
TCGA-C8-A12O-01A	BRCA	3.02192
TCGA-AO-A1KQ-01A	BRCA	0.716306
TCGA-AR-A256-01A	BRCA	3.67868
TCGA-OL-A66I-01A	BRCA	1
TCGA-C8-A3M7-01A	BRCA	3.74463
TCGA-A2-A04W-01A	BRCA	3.74463
TCGA-OL-A97C-01A	BRCA	3.02192
TCGA-AR-A1AM-01A	BRCA	5.22771
TCGA-AR-A2LR-01A	BRCA	5.22771
TCGA-EW-A1OZ-01A	BRCA	3.02192
TCGA-A1-A0SF-01A	BRCA	2.16462
TCGA-A1-A0SJ-01A	BRCA	3.02192
TCGA-D8-A1JU-01A	BRCA	7.01164
TCGA-A8-A07F-01A	BRCA	1.36529
TCGA-A7-A6VY-01A	BRCA	3.74463
TCGA-A2-A0CU-01A	BRCA	3.02192
TCGA-E9-A1NE-01A	BRCA	1.90602
TCGA-A7-A0D9-01A	BRCA	5.22771
TCGA-C8-A12K-01A	BRCA	2.32026
TCGA-A8-A07O-01A	BRCA	1.58546
TCGA-C8-A12U-01A	BRCA	1
TCGA-C8-A8HP-01A	BRCA	1.72993
TCGA-A2-A3XV-01A	BRCA	3.02192
TCGA-BH-A0AW-01A	BRCA	1.36529
TCGA-AN-A0FF-01A	BRCA	1.90602
TCGA-AR-A24M-01A	BRCA	2.55645
TCGA-E2-A2P6-01A	BRCA	1.36529
TCGA-C8-A130-01A	BRCA	3.02192
TCGA-C8-A274-01A	BRCA	1.36529
TCGA-D8-A73X-01A	BRCA	3.02192
TCGA-AO-A0JA-01A	BRCA	1.90602
TCGA-LL-A5YN-01A	BRCA	0.716306
TCGA-D8-A1XB-01A	BRCA	3.02192
TCGA-LL-A6FP-01A	BRCA	1.90602
TCGA-A7-A26E-01B	BRCA	2.90328
TCGA-A7-A6VX-01A	BRCA	3.02192
TCGA-AC-A6IW-01A	BRCA	2.12649
TCGA-BH-A0C3-01A	BRCA	5.22771
TCGA-E2-A1L9-01A	BRCA	3.16784
TCGA-BH-A1EV-01A	BRCA	4.05314
TCGA-A2-A3XX-01A	BRCA	3.74463
TCGA-E9-A1NA-01A	BRCA	1.90602
TCGA-EW-A1OY-01A	BRCA	1.90602
TCGA-BH-A0AU-01A	BRCA	1.90602
TCGA-B6-A0WS-01A	BRCA	3.02192
TCGA-B6-A0I5-01A	BRCA	0.716306
TCGA-E2-A14P-01A	BRCA	1.36529
TCGA-GM-A2DF-01A	BRCA	5.02248
TCGA-AQ-A04H-01B	BRCA	1.90602
TCGA-AC-A6NO-01A	BRCA	3.02192
TCGA-BH-A0E9-01B	BRCA	3.02192
TCGA-BH-A0B1-01A	BRCA	5.22771
TCGA-AR-A0TW-01A	BRCA	2.55645
TCGA-AN-A0FX-01A	BRCA	7.01164
TCGA-BH-A0BD-01A	BRCA	1
TCGA-D8-A1JA-01A	BRCA	2.90328
TCGA-S3-AA11-01A	BRCA	1.36529
TCGA-AO-A03T-01A	BRCA	1
TCGA-AC-A3YI-01A	BRCA	5.22771
TCGA-BH-A0B2-01A	BRCA	3.02192
TCGA-LL-A7T0-01A	BRCA	1
TCGA-BH-A0DH-01A	BRCA	3.02192
TCGA-AC-A8OQ-01A	BRCA	5.22771
TCGA-C8-A12N-01A	BRCA	1.90602
TCGA-AO-A03U-01B	BRCA	7.01164
TCGA-C8-A12T-01A	BRCA	7.01164
TCGA-AO-A0J2-01A	BRCA	1.36529
TCGA-D8-A27R-01A	BRCA	1.90602
TCGA-A2-A0EU-01A	BRCA	2.16462
TCGA-AO-A12D-01A	BRCA	2.36186
TCGA-D8-A1XT-01A	BRCA	3.02192
TCGA-A2-A0CW-01A	BRCA	1.90602
TCGA-E2-A10F-01A	BRCA	3.02192
TCGA-BH-A0E7-01A	BRCA	3.02192
TCGA-D8-A1XG-01A	BRCA	3.29728
TCGA-E9-A1N8-01A	BRCA	3.02192
TCGA-E2-A2P5-01A	BRCA	1.36529
TCGA-C8-A278-01A	BRCA	2.16462
TCGA-A8-A08R-01A	BRCA	7.01164
TCGA-E2-A15A-01A	BRCA	1.90602
TCGA-D8-A1JT-01A	BRCA	2.16462
TCGA-D8-A142-01A	BRCA	5.02248
TCGA-A2-A3Y0-01A	BRCA	1.23916
TCGA-AQ-A0Y5-01A	BRCA	3.02192
TCGA-A8-A07W-01A	BRCA	3.02192
TCGA-A1-A0SM-01A	BRCA	5.02248
TCGA-AC-A3EH-01A	BRCA	3.02192
TCGA-MS-A51U-01A	BRCA	5.22771
TCGA-AR-A24K-01A	BRCA	2.55645
TCGA-AC-A2BM-01A	BRCA	1.90602
TCGA-A2-A3XY-01A	BRCA	5.22771
TCGA-E2-A14W-01A	BRCA	1.90602
TCGA-BH-A1F8-01A	BRCA	2.90328
TCGA-E9-A1RA-01A	BRCA	4.05314
TCGA-A8-A0A6-01A	BRCA	1.90602
TCGA-AC-A7VC-01A	BRCA	3.02192
TCGA-C8-A27B-01A	BRCA	2.32026
TCGA-S3-AA15-01A	BRCA	3.02192
TCGA-BH-A1ES-01A	BRCA	5.22771
TCGA-E2-A1L6-01A	BRCA	3.02192
TCGA-E9-A1R0-01A	BRCA	3.02192
TCGA-BH-A0B6-01A	BRCA	1
TCGA-B6-A0RN-01A	BRCA	1.90602
TCGA-A8-A09W-01A	BRCA	3.02192
TCGA-EW-A1P3-01A	BRCA	3.02192
TCGA-A2-A0T6-01A	BRCA	4.05314
TCGA-A7-A5ZW-01A	BRCA	2.16462
TCGA-BH-A203-01A	BRCA	1.90602
TCGA-DS-A7WI-01A	CESC	2.32026
TCGA-EX-A449-01A	CESC	1.66202
TCGA-VS-A958-01A	CESC	2.74273
TCGA-MY-A5BE-01A	CESC	1
TCGA-C5-A905-01A	CESC	3.67868
TCGA-Q1-A73Q-01A	CESC	4.42247
TCGA-BI-A0VR-01A	CESC	3.67868
TCGA-EK-A2PK-01A	CESC	2.32026
TCGA-FU-A3WB-01A	CESC	3.67868
TCGA-MA-AA41-01A	CESC	1.72993
TCGA-IR-A3LK-01A	CESC	2.74273
TCGA-VS-A952-01A	CESC	1.66202
TCGA-C5-A8YT-01A	CESC	3.29728
TCGA-EA-A5ZD-01A	CESC	3.67868
TCGA-C5-A1MI-01A	CESC	3.29728
TCGA-EK-A2RO-01A	CESC	3.67868
TCGA-FU-A3YQ-01A	CESC	3.67868
TCGA-C5-A7CL-01A	CESC	2.32026
TCGA-VS-A9UB-01A	CESC	2.32026
TCGA-C5-A1BM-01A	CESC	3.67868
TCGA-C5-A2LY-01A	CESC	1
TCGA-EA-A50E-01A	CESC	7.01164
TCGA-ZJ-AAXU-01A	CESC	3.67868
TCGA-HM-A6W2-01A	CESC	1.90602
TCGA-C5-A1MQ-01A	CESC	1.72993
TCGA-C5-A1BE-01B	CESC	7.01164
TCGA-C5-A1MN-01A	CESC	3.67868
TCGA-VS-A9U7-01A	CESC	1.72993
TCGA-ZJ-AB0I-01A	CESC	3.67868
TCGA-LP-A4AX-01A	CESC	2.32026
TCGA-JW-A5VH-01A	CESC	2.55645
TCGA-C5-A902-01A	CESC	1.72993
TCGA-FU-A23L-01A	CESC	3.67868
TCGA-FU-A3NI-01A	CESC	7.01164
TCGA-VS-A9UT-01A	CESC	1
TCGA-C5-A8YR-01A	CESC	4.42247
TCGA-VS-A94X-01A	CESC	2.74273
TCGA-VS-A8EK-01A	CESC	2.32026
TCGA-FU-A3HZ-01A	CESC	4.42247
TCGA-ZJ-AAXT-01A	CESC	2.32026
TCGA-C5-A2LT-01A	CESC	3.67868
TCGA-WL-A834-01A	CESC	3.67868
TCGA-FU-A40J-01A	CESC	2.32026
TCGA-MU-A5YI-01A	CESC	7.01164
TCGA-MA-AA3W-01A	CESC	1.58546
TCGA-EK-A2PG-01A	CESC	3.67868
TCGA-UC-A7PG-06A	CESC	3.67868
TCGA-EA-A5ZE-01A	CESC	1
TCGA-4J-AA1J-01A	CESC	5.22771
TCGA-C5-A7CH-01A	CESC	3.67868
TCGA-C5-A8XH-01A	CESC	1.23916
TCGA-JW-A69B-01A	CESC	0.716306
TCGA-ZX-AA5X-01A	CESC	7.01164
TCGA-VS-A9V0-01A	CESC	1
TCGA-EA-A97N-01A	CESC	7.01164
TCGA-Q1-A73S-01A	CESC	5.22771
TCGA-ZJ-AAXA-01A	CESC	7.01164
TCGA-DS-A0VL-01A	CESC	1.72993
TCGA-C5-A1BN-01B	CESC	3.67868
TCGA-EK-A2IR-01A	CESC	7.01164
TCGA-C5-A2M1-01A	CESC	2.32026
TCGA-C5-A7CJ-01A	CESC	7.01164
TCGA-EA-A1QT-01A	CESC	2.32026
TCGA-VS-A957-01A	CESC	3.67868
TCGA-JW-A5VK-01A	CESC	2.32026
TCGA-EK-A2R7-01A	CESC	1.72993
TCGA-EA-A4BA-01A	CESC	1.23916
TCGA-EA-A411-01A	CESC	3.67868
TCGA-HM-A6W2-06A	CESC	1.23916
TCGA-C5-A7UE-01A	CESC	3.67868
TCGA-JW-A5VI-01A	CESC	2.32026
TCGA-VS-A9UD-01A	CESC	1.23916
TCGA-DS-A0VN-01A	CESC	3.67868
TCGA-HM-A3JK-01A	CESC	2.74273
TCGA-LP-A5U3-01A	CESC	2.32026
TCGA-DG-A2KH-01A	CESC	2.32026
TCGA-C5-A2LS-01A	CESC	1.23916
TCGA-IR-A3LH-01A	CESC	2.32026
TCGA-Q1-A5R3-01A	CESC	1.72993
TCGA-MA-AA3X-01A	CESC	7.01164
TCGA-VS-A954-01A	CESC	2.55645
TCGA-EA-A3HS-01A	CESC	3.67868
TCGA-EA-A3HR-01A	CESC	7.01164
TCGA-ZJ-AB0H-01A	CESC	3.67868
TCGA-JX-A3Q0-01A	CESC	3.67868
TCGA-DS-A3LQ-01A	CESC	7.01164
TCGA-EK-A2R8-01A	CESC	1.72993
TCGA-FU-A3TX-01A	CESC	1
TCGA-EA-A556-01A	CESC	3.29728
TCGA-VS-A9UO-01A	CESC	1
TCGA-EX-A3L1-01A	CESC	2.32026
TCGA-C5-A7CM-01A	CESC	3.29728
TCGA-ZJ-AAXF-01A	CESC	3.67868
TCGA-2W-A8YY-01A	CESC	1.66202
TCGA-VS-A9UR-01A	CESC	1.72993
TCGA-C5-A7X3-01A	CESC	2.32026
TCGA-HM-A4S6-01A	CESC	2.32026
TCGA-FU-A770-01A	CESC	3.67868
TCGA-VS-A9UC-01A	CESC	4.42247
TCGA-DS-A1OC-01A	CESC	5.22771
TCGA-EX-A69M-01A	CESC	1
TCGA-C5-A1MK-01A	CESC	7.01164
TCGA-JW-A5VJ-01A	CESC	2.74273
TCGA-EX-A1H6-01B	CESC	3.67868
TCGA-EA-A3Y4-01A	CESC	1.23916
TCGA-JW-A5VL-01A	CESC	2.32026
TCGA-EA-A1QS-01A	CESC	3.29728
TCGA-EK-A2PM-01A	CESC	4.42247
TCGA-JX-A3PZ-01A	CESC	1.72993
TCGA-DG-A2KK-01A	CESC	1.72993
TCGA-VS-A8QM-01A	CESC	3.67868
TCGA-C5-A7CO-01A	CESC	3.67868
TCGA-VS-A9UH-01A	CESC	3.67868
TCGA-EA-A439-01A	CESC	3.29728
TCGA-EK-A3GJ-01A	CESC	2.32026
TCGA-EA-A3HQ-01A	CESC	2.74273
TCGA-EA-A6QX-01A	CESC	1.72993
TCGA-C5-A7UI-01A	CESC	1.34125
TCGA-ZJ-AAXD-01A	CESC	7.01164
TCGA-LP-A4AV-01A	CESC	2.32026
TCGA-VS-A950-01A	CESC	4.42247
TCGA-C5-A3HD-01B	CESC	2.74273
TCGA-DS-A5RQ-01A	CESC	3.67868
TCGA-VS-A9UP-01A	CESC	3.29728
TCGA-C5-A7CG-01A	CESC	2.63506
TCGA-MY-A5BD-01A	CESC	2.32026
TCGA-C5-A1M6-01A	CESC	3.29728
TCGA-VS-A8QF-01A	CESC	2.32026
TCGA-EK-A2RE-01A	CESC	3.67868
TCGA-UC-A7PG-01A	CESC	7.01164
TCGA-VS-AA62-01A	CESC	1.72993
TCGA-C5-A2M2-01A	CESC	2.32026
TCGA-MA-AA3Y-01A	CESC	3.67868
TCGA-MY-A913-01A	CESC	2.74273
TCGA-C5-A7CK-01A	CESC	7.01164
TCGA-UC-A7PI-01A	CESC	1.72993
TCGA-C5-A7X5-01A	CESC	7.01164
TCGA-DG-A2KJ-01A	CESC	1
TCGA-VS-A9V3-01A	CESC	1.72993
TCGA-DS-A7WF-01A	CESC	2.36186
TCGA-C5-A8XK-01A	CESC	2.32026
TCGA-EA-A5FO-01A	CESC	1.72993
TCGA-VS-A9UZ-01A	CESC	1.72993
TCGA-EK-A2IP-01A	CESC	2.63506
TCGA-VS-A94W-01A	CESC	1
TCGA-DS-A1OB-01A	CESC	5.02248
TCGA-EA-A410-01A	CESC	1.90602
TCGA-EX-A8YF-01A	CESC	1.72993
TCGA-EK-A2H0-01A	CESC	1.66202
TCGA-VS-A9UV-01A	CESC	3.67868
TCGA-LP-A7HU-01A	CESC	2.32026
TCGA-VS-A8EI-01A	CESC	1.72993
TCGA-BI-A0VS-01A	CESC	4.42247
TCGA-DS-A0VM-01A	CESC	1.72993
TCGA-IR-A3LB-01A	CESC	1.66202
TCGA-VS-A8EC-01A	CESC	7.01164
TCGA-VS-A9V2-01A	CESC	1.72993
TCGA-EK-A3GN-01A	CESC	1
TCGA-IR-A3LA-01A	CESC	3.29728
TCGA-C5-A7X8-01A	CESC	3.29728
TCGA-EK-A2RL-01A	CESC	1.72993
TCGA-C5-A0TN-01A	CESC	2.32026
TCGA-FU-A57G-01A	CESC	3.74463
TCGA-EK-A2PI-01A	CESC	5.22771
TCGA-Q1-A73P-01A	CESC	1.23916
TCGA-C5-A1MP-01A	CESC	1
TCGA-VS-A8EL-01A	CESC	3.67868
TCGA-C5-A1BQ-01C	CESC	3.67868
TCGA-ZJ-AAXI-01A	CESC	0.716306
TCGA-FU-A23K-01A	CESC	1.72993
TCGA-Q1-A6DT-01A	CESC	2.32026
TCGA-EK-A2H1-01A	CESC	2.32026
TCGA-C5-A1M5-01A	CESC	3.67868
TCGA-EA-A44S-01A	CESC	3.67868
TCGA-EA-A78R-01A	CESC	1.72993
TCGA-C5-A7XC-01A	CESC	2.32026
TCGA-VS-A9V4-01A	CESC	0.716306
TCGA-EK-A2RA-01A	CESC	2.32026
TCGA-EX-A1H5-01A	CESC	7.01164
TCGA-VS-A953-01A	CESC	3.67868
TCGA-MA-AA3Z-01A	CESC	2.74273
TCGA-VS-A959-01A	CESC	5.22771
TCGA-FU-A3EO-01A	CESC	1.23916
TCGA-BI-A20A-01A	CESC	2.74273
TCGA-DS-A1OD-01A	CESC	0.716306
TCGA-C5-A1M9-01A	CESC	1.72993
TCGA-Q1-A6DW-01A	CESC	3.67868
TCGA-C5-A3HF-01A	CESC	3.67868
TCGA-VS-A8Q9-01A	CESC	1.72993
TCGA-Q1-A5R2-01A	CESC	2.32026
TCGA-VS-A8Q8-01A	CESC	1.66202
TCGA-C5-A1BJ-01A	CESC	3.67868
TCGA-Q1-A6DV-01A	CESC	2.63506
TCGA-EK-A3GK-01A	CESC	3.67868
TCGA-IR-A3LF-01A	CESC	1.23916
TCGA-C5-A1M7-01A	CESC	1.66202
TCGA-EK-A2PL-01A	CESC	3.67868
TCGA-LP-A4AU-01A	CESC	3.67868
TCGA-ZJ-AAXJ-01A	CESC	2.63506
TCGA-VS-A94Z-01A	CESC	2.32026
TCGA-EK-A2GZ-01A	CESC	5.22771
TCGA-JW-A852-01A	CESC	1.72993
TCGA-VS-A9V5-01A	CESC	1.72993
TCGA-ZJ-AAXB-01A	CESC	4.42247
TCGA-EK-A2R9-01A	CESC	1
TCGA-C5-A3HE-01A	CESC	1.72993
TCGA-ZJ-A8QR-01A	CESC	3.67868
TCGA-EK-A2RC-01A	CESC	2.74273
TCGA-C5-A1ML-01A	CESC	5.22771
TCGA-FU-A5XV-01A	CESC	3.67868
TCGA-EA-A43B-01A	CESC	1.72993
TCGA-MA-AA42-01A	CESC	2.32026
TCGA-VS-A9UJ-01A	CESC	7.01164
TCGA-VS-A9V1-01A	CESC	1
TCGA-JW-AAVH-01A	CESC	2.32026
TCGA-VS-A8EJ-01A	CESC	1.72993
TCGA-Q1-A73O-01A	CESC	3.67868
TCGA-FU-A2QG-01A	CESC	2.32026
TCGA-DS-A1O9-01A	CESC	1.23916
TCGA-VS-A8QA-01A	CESC	1.72993
TCGA-C5-A1MH-01A	CESC	3.67868
TCGA-XS-A8TJ-01A	CESC	3.67868
TCGA-C5-A1ME-01A	CESC	1.72993
TCGA-C5-A2LZ-01A	CESC	3.67868
TCGA-GH-A9DA-01A	CESC	3.67868
TCGA-VS-A8QH-01A	CESC	1.13567
TCGA-VS-A9U6-01A	CESC	1.72993
TCGA-C5-A8YQ-01A	CESC	3.67868
TCGA-DS-A1OA-01A	CESC	3.67868
TCGA-HG-A2PA-01A	CESC	4.42247
TCGA-EA-A3QD-01A	CESC	2.63506
TCGA-C5-A7UC-01A	CESC	5.02248
TCGA-MA-AA43-01A	CESC	7.01164
TCGA-Q1-A73R-01A	CESC	1.72993
TCGA-PN-A8MA-01A	CESC	1.36529
TCGA-C5-A2LV-01A	CESC	2.32026
TCGA-VS-A9UQ-01A	CESC	2.32026
TCGA-MY-A5BF-01A	CESC	3.67868
TCGA-JX-A3Q8-01A	CESC	2.74273
TCGA-VS-A9UM-01A	CESC	2.32026
TCGA-VS-A8EH-01A	CESC	1.72993
TCGA-LP-A4AW-01A	CESC	7.01164
TCGA-C5-A1MJ-01A	CESC	2.36186
TCGA-UC-A7PD-01A	CESC	2.32026
TCGA-EK-A2RK-01A	CESC	3.67868
TCGA-Q1-A5R1-01A	CESC	3.67868
TCGA-VS-A9U5-01A	CESC	3.67868
TCGA-EA-A3QE-01A	CESC	3.67868
TCGA-EK-A3GM-01A	CESC	1
TCGA-EA-A3HT-01A	CESC	7.01164
TCGA-IR-A3L7-01A	CESC	5.22771
TCGA-C5-A2LX-01A	CESC	1
TCGA-MU-A51Y-01A	CESC	3.67868
TCGA-JX-A5QV-01A	CESC	3.67868
TCGA-FU-A3HY-01A	CESC	3.67868
TCGA-MU-A8JM-01A	CESC	3.67868
TCGA-RA-A741-01A	CESC	1.72993
TCGA-C5-A1BF-01B	CESC	2.32026
TCGA-C5-A3HL-01A	CESC	3.67868
TCGA-EK-A2RN-01A	CESC	1.66202
TCGA-C5-A901-01A	CESC	7.01164
TCGA-VS-A9UI-01A	CESC	3.67868
TCGA-VS-A9UY-01A	CESC	3.67868
TCGA-C5-A1MF-01A	CESC	1
TCGA-VS-A9UL-01A	CESC	1.90602
TCGA-ZJ-AAXN-01A	CESC	3.67868
TCGA-ZJ-A8QQ-01A	CESC	2.32026
TCGA-C5-A8XI-01A	CESC	2.74273
TCGA-C5-A8XJ-01A	CESC	5.22771
TCGA-EA-A5ZF-01A	CESC	3.29728
TCGA-IR-A3LC-01A	CESC	2.32026
TCGA-C5-A1BK-01B	CESC	1.66202
TCGA-DR-A0ZM-01A	CESC	1.23916
TCGA-EK-A2RB-01A	CESC	3.67868
TCGA-VS-A8EB-01A	CESC	1
TCGA-VS-A94Y-01A	CESC	7.01164
TCGA-ZJ-AAX8-01A	CESC	3.67868
TCGA-VS-A8QC-01A	CESC	3.67868
TCGA-C5-A907-01A	CESC	2.32026
TCGA-EK-A2RM-01A	CESC	3.29728
TCGA-VS-A9UU-01A	CESC	3.67868
TCGA-C5-A7UH-01A	CESC	2.32026
TCGA-C5-A1M8-01A	CESC	4.42247
TCGA-DS-A7WH-01A	CESC	7.01164
TCGA-IR-A3LI-01A	CESC	1.23916
TCGA-DR-A0ZL-01A	CESC	3.67868
TCGA-DS-A0VK-01A	CESC	1.72993
TCGA-IR-A3LL-01A	CESC	2.63506
TCGA-HM-A3JJ-01A	CESC	2.74273
TCGA-EK-A2RJ-01A	CESC	2.32026
TCGA-FU-A3TQ-01A	CESC	2.63506
TCGA-DG-A2KL-01A	CESC	3.67868
TCGA-C5-A8ZZ-01A	CESC	7.01164
TCGA-EA-A5O9-01A	CESC	3.67868
TCGA-LP-A5U2-01A	CESC	1.23916
TCGA-JW-A5VG-01A	CESC	2.32026
TCGA-ZJ-AAX4-01A	CESC	3.67868
TCGA-EA-A3HU-01A	CESC	2.32026
TCGA-R2-A69V-01A	CESC	2.32026
TCGA-DG-A2KM-01A	CESC	3.67868
TCGA-EX-A69L-01A	CESC	1.72993
TCGA-ZJ-A8QO-01A	CESC	1
TCGA-C5-A1BL-01A	CESC	3.67868
TCGA-C5-A1BI-01B	CESC	3.67868
TCGA-UC-A7PF-01A	CESC	2.74273
TCGA-VS-A8EG-01A	CESC	3.67868
TCGA-ZD-A8I3-01A	CHOL	1
TCGA-W5-AA30-01A	CHOL	1
TCGA-W5-AA38-01A	CHOL	1
TCGA-YR-A95A-01A	CHOL	1
TCGA-W5-AA36-01A	CHOL	1
TCGA-W5-AA2U-01A	CHOL	1.58546
TCGA-ZH-A8Y2-01A	CHOL	1
TCGA-3X-AAVB-01A	CHOL	2.74273
TCGA-W5-AA2Q-01A	CHOL	1.90602
TCGA-W5-AA2Z-01A	CHOL	1.90602
TCGA-3X-AAVA-01A	CHOL	1.34125
TCGA-ZH-A8Y6-01A	CHOL	3.02192
TCGA-ZH-A8Y1-01A	CHOL	1
TCGA-ZU-A8S4-01A	CHOL	2.32026
TCGA-W5-AA2R-01A	CHOL	1
TCGA-W5-AA2H-01A	CHOL	0.716306
TCGA-W5-AA39-01A	CHOL	1
TCGA-W5-AA2O-01A	CHOL	1
TCGA-3X-AAVC-01A	CHOL	1
TCGA-3X-AAVE-01A	CHOL	1
TCGA-W5-AA2X-01A	CHOL	1
TCGA-ZH-A8Y5-01A	CHOL	1
TCGA-W5-AA33-01A	CHOL	2.12649
TCGA-ZH-A8Y8-01A	CHOL	1
TCGA-WD-A7RX-01A	CHOL	1
TCGA-W5-AA34-01A	CHOL	1
TCGA-W6-AA0S-01A	CHOL	2.12649
TCGA-4G-AAZO-01A	CHOL	1
TCGA-W5-AA31-01A	CHOL	1
TCGA-W5-AA2W-01A	CHOL	1
TCGA-ZH-A8Y4-01A	CHOL	1
TCGA-W5-AA2T-01A	CHOL	1
TCGA-4G-AAZT-01A	CHOL	1
TCGA-3X-AAV9-01A	CHOL	2.74273
TCGA-W5-AA2I-01A	CHOL	1
TCGA-W5-AA2G-01A	CHOL	1
TCGA-DM-A288-01A	COAD	0.716306
TCGA-QL-A97D-01A	COAD	0.716306
TCGA-CM-6164-01A	COAD	1.13567
TCGA-G4-6299-01A	COAD	0.716306
TCGA-F4-6463-01A	COAD	1.90602
TCGA-AZ-4615-01A	COAD	1.72993
TCGA-AA-3549-01A	COAD	1.13567
TCGA-AY-4071-01A	COAD	0.716306
TCGA-CM-4752-01A	COAD	0.716306
TCGA-DM-A1D9-01A	COAD	1.66202
TCGA-AA-3688-01A	COAD	0.716306
TCGA-AA-3854-01A	COAD	1
TCGA-A6-3809-01A	COAD	1.23916
TCGA-CM-6165-01A	COAD	1.36529
TCGA-CM-4751-01A	COAD	1.96463
TCGA-A6-5659-01A	COAD	0.716306
TCGA-AA-3494-01A	COAD	0.716306
TCGA-CM-4750-01A	COAD	1.58546
TCGA-AZ-4682-01B	COAD	0.716306
TCGA-G4-6625-01A	COAD	0.716306
TCGA-DM-A0XF-01A	COAD	1.23916
TCGA-AA-3529-01A	COAD	2.74273
TCGA-AA-3949-01A	COAD	1.23916
TCGA-AA-3848-01A	COAD	1
TCGA-CA-6715-01A	COAD	0.716306
TCGA-AA-3818-01A	COAD	1.13567
TCGA-AA-3710-01A	COAD	1.23916
TCGA-AA-3950-01A	COAD	1
TCGA-AA-A00N-01A	COAD	1.13567
TCGA-A6-6138-01A	COAD	0.716306
TCGA-DM-A28E-01A	COAD	0.716306
TCGA-D5-6538-01A	COAD	0.716306
TCGA-AA-A00K-01A	COAD	1.13567
TCGA-AA-3715-01A	COAD	2.74273
TCGA-AA-3506-01A	COAD	1
TCGA-AU-3779-01A	COAD	0.716306
TCGA-CK-5916-01A	COAD	1.72993
TCGA-QG-A5Z1-01A	COAD	2.16462
TCGA-AD-6890-01A	COAD	1.96463
TCGA-A6-2685-01A	COAD	2.74273
TCGA-AA-A00W-01A	COAD	1
TCGA-CK-5914-01A	COAD	0.716306
TCGA-A6-2686-01A	COAD	0.716306
TCGA-CA-5255-01A	COAD	0.716306
TCGA-A6-A5ZU-01A	COAD	1.72993
TCGA-NH-A50V-01A	COAD	1.72993
TCGA-QG-A5YX-01A	COAD	0.960742
TCGA-A6-2677-01A	COAD	2.63506
TCGA-CA-6717-01A	COAD	2.16462
TCGA-A6-6649-01A	COAD	3.02192
TCGA-NH-A6GC-01A	COAD	3.29728
TCGA-AA-3562-01A	COAD	0.716306
TCGA-A6-4105-01A	COAD	0.716306
TCGA-A6-6141-01A	COAD	0.716306
TCGA-AA-A00R-01A	COAD	1
TCGA-AZ-4684-01A	COAD	1.72993
TCGA-CK-6747-01A	COAD	0.716306
TCGA-AU-6004-01A	COAD	1
TCGA-A6-2672-01B	COAD	1.58546
TCGA-QG-A5Z2-01A	COAD	1.13567
TCGA-A6-6780-01A	COAD	1.66202
TCGA-F4-6459-01A	COAD	3.02192
[truncated: 8,329 more rows]
